# Supplementary material
Source: PubMed Central journal article supplement (PMC9641975)
Supplement: NIHMS1844032-supplement-1.pdf [file NIHMS1844032-supplement-1.pdf]

## Supplementary Web Appendix

### **Table of Contents**

1. Additional Methods
3. Additional Safety Data Unrelated to CED
4. Additional Molecular Results
5. Supplementary Figure S1
7. Supplementary Figure S2
8. Supplementary Figure S3-4
9. Supplementary Figure S5
10. Supplementary Figure S6
11. Supplementary References
12. Supplementary Table S1: Supplemental Clinical Information
  12. S1A: Basic Clinical and Demographic Data
  13. S1B: History of Treatments
  14. S1C: Pathology Reports
  19. S1D: Symptoms pre- and post-trial
  22. S1E: Concomitant medications
  23. S1F: Serious adverse events
  24. S1G: Karnofsky Performance Score (KPS)
  25. S1H: Neuro-cognitive assessments
  26. S1I: Quality of Life (QoL) assessments
27. Supplementary Table S2: Radiographic Volume of Distribution
28. Supplementary Table S3: Differential Gene Expression Analysis Post-CED vs. Pre-CED (fdr<0.05)
65. Supplementary Table S4: Gene Set Enrichment Analysis Post-CED vs. Pre-CED
67. Supplementary Table S5: Glioma Tumor Cell State Classification
68. Trial Protocol

## ADDITIONAL METHODS

**MR & PET Imaging acquisition.** MR imaging was performed on a 3T GE Signa HDxt scanner (software version HD23.0\_V03\_1614.b). Sagittal volumetric gradient echo T1-weighted (T1w) MRIs (TR = 7.27 ms, TE = 2.7, inversion time = 450 ms, matrix = 224 x 512 x 512, voxel = 0.7 x 0.47 x 0.47 mm) were obtained pre-operatively and on post-operative day 0 or 1 following catheter implantation to confirm catheter placement prior to infusion initiation. For the first infusion, MRIs were collected ~8 hours, ~14 hours, ~24 hours, and ~48 hours after the start of infusion, and ~8 hours, ~14 hours, and ~24 hours after completion. For the remaining infusions, MRIs were collected immediately prior to and ~48 hours after the start of each infusion. <sup>18</sup>F-FDG PET imaging was performed on Patients 3, 4 and 5 using a Siemens Biograph 64\_mCT (software version VG60A; matrix = 400 x 400 x 148, voxel = 1.0 x 1.0 x 1.5 mm) pre-operatively, ~48 hours after start of pulse 1, and ~24 hours after start of pulse 4.

**MR & PET Imaging analysis.** MRI data were processed with FMRIB Software Library (FSL version 6.0.0) (1) and Matlab (2020b, MathWorks) software. T1w and PET images from all scanning sessions were co-registered to the pre-implantation T1w scan using FSL-FLIRT (linear, 6 degrees of freedom). T1w images were intensity normalized using histogram matching to a healthy control subject. To calculate the spatial distribution of the infused gadolinium contrast, the pre-implantation T1w image was subtracted from all subsequent T1w images. The difference images were then thresholded and binarized to create a 3D mask of the infused volume at each time point and the mask volumes were then plotted as a function of time for each patient. To estimate the time to peak volume and maximum achieved volume, the time course for each patient's first infusion was fit to a three-parameter gamma function

$$y_{fit} = y_{max} * \left( \frac{t}{t_{max}} \right)^{b * t_{max}} * e^{b * (t_{max} - t)}$$

where  $y_{max}$  represents the peak volume,  $t_{max}$  represents the time of peak volume and  $b$  represents the shape of the function. To estimate backflow from the catheter, a mask was drawn around the infused volume located in the subdural CSF at the base of the catheter and the volume plotted as a function of time. All <sup>18</sup>F-FDG-metabolism images were intensity normalized to the patient's pre-infusion, contralesional hemisphere using histogram matching. Post-infusion <sup>18</sup>F-FDG-metabolism images were converted to percent signal change by dividing by the pre-infusion image. The maximum infusion mask was used to estimate the effect of TPT on <sup>18</sup>F-FDG metabolism.

**Immunohistochemistry.** Paraffin embedded tissue was serially sectioned into 5µM sections mounted on immunoblock slides. Immunoperoxidase was performed using Antibodies to Sox2 (Rabbit, abcam #ab92494), Ki67 (Rabbit, Cell Signaling #9129), CD68 (Mouse, abcam #ab955), Neun (Mouse IgG1, Millipore #MAB377) under a standard staining protocol with deparaffinization, antigen retrieval using 10mM sodium citrate buffer, Vectastain ABC Kit (PK4001 for rabbit, PK4002 for mouse) and Dako DAB+ liquid substrate (#K3468). After peroxidase staining, slides were immersed in dH<sub>2</sub>O, counterstained with hematoxylin, dehydrated and coverslips were mounted using Permount mounting medium (Fisher Chemical #SP15-100).

**Immunohistochemistry quantification.** Stained slides were scanned and digitized using a Leica SCN400 automated image digitizing system. A total of 87 MRI-localized biopsies were quantified for each stain, including pre-CED (n=37) and post-CED (n=50). For each SCN file, ImageJ was used to outline tissue area at 20x magnification. Semi-automated quantification of DAB-stained cells and nuclei was performed as follows. Images were split into blue channels for nuclei quantification and red channels for DAB quantification. Images were converted to 8-bit, normalized and thresholded using the local thresholding algorithm first described by Phansalkar et al.<sup>15</sup> The local threshold is determined using the following algorithm:  $t = \text{mean} * (1 + p * \exp(-q * \text{mean}) + k * ((\text{stdev}/r) - 1))$  where mean and STD are calculated from a 3x3 square of pixels centered on the pixel of interest. Values of k, r are optimized based on multiple high-powered fields of masks ensuring accurate quantification on each image. Concordance between manual and semi-automated quantification was confirmed for each stain with  $r^2$  value greater than 0.90 in images from each patient before application to all biopsies. Labeling indices were calculated from dividing DAB+ cells over total number of cells (nuclei). Labeling indices pre-CED and post-CED were compared statistically using an unpaired student's T-test, as there were an unequal number of samples between pre- and post-resection due to the nature of the study design.

**RNA isolation, quantification and sequencing.** Biopsies (n=86) were lysed using a 5mm stainless steel bead (QIAGEN, 69989). RNA was extracted from tissue lysate using the RNeasy Mini kit (QIAGEN, 74106). Only samples with RNA Integrity Number (RIN) greater than 6 were used for sequencing. Expression profiles were generated using the Illumina TruSeq v2 RNA-Seq kit with 80 million paired end base reads on a Novaseq 6000 sequencer. Alignment and mapping of RNA sequencing reads was done in partnership with the Columbia Sulzberger Genome Center. Transcripts were pseudo-aligned, mapped and quantified to counts using the Kallisto pipeline.<sup>16</sup>

**RNaseq normalization, Differential gene expression analysis, and gene set enrichment analysis.** All downstream RNA sequencing analysis was performed in the statistical programming language R (version 4.0.3). Raw transcript counts for each sample were normalized via the "DESeq2" package after filtering out genes that are not protein-coding. Differential gene expression analysis was also performed via DESeq2, comparing post-treatment biopsies (n=51) to pre-treatment biopsies (n=35), both on a patient-by-patient level, as well as by pooling samples across all patients (2). Volcano plot and heatmap were generated based on normalized expression between pre- and post-CED biopsies, generated via "EnhancedVolcano" package(3). Gene Set Enrichment Analysis

(implemented via the GSEA desktop version 4.1.0) was performed using the 50 Cancer Hallmarks gene sets patient-by-patient comparing pre-treatment and post-treatment MRI-localized biopsies. Fisher p-integration was performed on FDR-adjusted p-values across all patients for each pathway, and significant pathways ( $p < 0.05$ ) were visualized on a heatmap with normalized enrichment scores for each patient.

**Glioma State Analysis.** GSVA analysis(4) was performed on all MRI-localized biopsies (86 samples) using gene signatures for six distinct glioma cell states derived from single-nuclei RNA sequencing (snRNAseq) (5), as well as scRNAseq signatures derived from Neftel et al(6), and a heatmap was generated displaying the enrichment scores for each gene set for each biopsy, scaled across all samples. Each biopsy was annotated by the glioma cell state it was most enriched in (**Supplementary Table S4**), and Pearson's chi-squared test was performed to statistically quantify change in phenotype between conditions.

**Measurement of TPT concentrations.** TPT concentrations were measured in tissue samples using matrix-assisted laser desorption/ionization mass spectrometric imaging (MALDI MSI) methodology.

#### *MALDI tissue preparation*

The MALDI MSI tissue mimetic for drug quantification of TPT was adopted from Groseclose and Castellino (7) and has been further developed for several MALDI MSI studies (8, 9). Here, a tissue microarray (TMA) mold with 1.5 mm core diameter channels composed of 40% gelatin was used to create a concentration ladder of TPT. To account for the tissue matrix, human autopsy brain homogenates were spiked with varying concentrations of TPT ranging from 1 - 20  $\mu\text{M}$ . The spiked homogenates were punched into the TMA channels and frozen at  $-80\text{ }^\circ\text{C}$ . Brain specimens and TMA were sectioned at 10  $\mu\text{m}$  thickness, and thaw mounted directly onto indium tin oxide (ITO) slides. Serial sections were used for MALDI MRM MSI and brightfield microscopy imaging (Zeiss Observer Z.1, Oberkochen, Germany) of hematoxylin and eosin (H&E) staining. To avoid TPT interconversion between the lactone and carboxylate forms, a low pH phosphate solution was sprayed first on the tissues using a TM-sprayer (HTX imaging, Carboro, NC). Two coats of the phosphate buffer solution (pH 3) were sprayed at a flow rate (0.05 mL/min), spray nozzle velocity (1200 mm/min), nitrogen gas pressure (10 psi), spray nozzle temperature ( $80\text{ }^\circ\text{C}$ ), and track spacing (2 mm) were sprayed on the tissue samples. The MALDI matrix 2,5-dihydroxybenzoic acid (160 mg/mL) was dissolved in 70:30 methanol: 0.1% TFA with 1% DMSO. The ITO slides with tissue and mimetic sections coated with phosphate solution were sprayed with the matrix using a TM sprayer with a two-pass cycle at a flow rate (0.18 mL/min), spray nozzle velocity (1200 mm/min), nitrogen gas pressure (10 psi), spray nozzle temperature ( $75\text{ }^\circ\text{C}$ ), and track spacing (2 mm).

#### *MALDI mass spectrometry imaging*

Matrix assisted laser desorption ionization (MALDI) MS imaging and quantitation of TPT from clinical specimens was performed using a timsTOF fleX mass spectrometer (Bruker Daltonics, Billerica, MA) operating in positive ion mode. A multiple reaction monitoring (MRM) method was applied to improve sensitivity and selectivity for quantitation. Using the ESI configuration on the dual-source instrument, a method for TPT was developed in which the ion transfer funnels, quadrupole, collision cell, and focus pre-TOF settings were optimized. Calibration of the mass range for each method was performed through the direct infusion of an Agilent tune mix solution (Agilent Technologies, Santa Clara, CA) and the MRM settings were optimized with direct infusions of TPT. The optimal collision energy of 20 eV for TPT was determined with an isolation width of 3  $m/z$ . The mass range was selected to encompass both the precursor and product ions and was set to  $m/z$  300-600 for TPT. For MALDI MSI quantitation, the transition of precursor to product was  $m/z$  422.171  $\rightarrow$  377.111 for TPT. A spatial resolution of 100  $\mu\text{m}$  was implemented for MALDI MSI sequences. A 5,000 Hz laser repetition rate and 3,000 laser shots per pixel were used. The 12 biopsies and a triplicate of the TPT mimetic were imaged and data analysis and visualization were performed using the SCiLS Lab software (version 2020a premium, Bruker Daltonics, Billerica, MA). The data was normalized using total ion current (TIC). Using the three technical sections of the TPT mimetic, the pixels of each concentration channels were averaged. The MALDI signal intensity was calibrated for quantitation of TPT using a linear regression of the averaged ion intensity from each mimetic concentration. Relative standard deviation (RSD) for each concentration was calculated (0  $\mu\text{M}$ - 18.3%, 1  $\mu\text{M}$ - 11.5%, 3  $\mu\text{M}$ - 27.9%, 5  $\mu\text{M}$ - 16.9%, 10  $\mu\text{M}$ - 10.3%, and 20  $\mu\text{M}$ - 12.1%.) and the limit of detection (LOD) and limit of quantification (LOQ) were based on signal-to-noise (S/N) ratio of  $> 3$  and  $> 10$  respectively.

#### **Additional Safety Data Unrelated to CED**

Patient 4 safely tolerated CED of TPT but suffered a stroke during surgical resection of the tumor; this adverse reaction is not directly related to the treatment delivery but affected the patient's postoperative Quality of Life (QoL) and performance outcomes. Patient 5 had arm and face weakness five days after completion of treatment due to a middle cerebral artery stroke which was attributed to a radiographically confirmed stenosis of the M2 branch from prior radiation therapy. SAEs and symptoms **prior** to and after enrollment in the trial are further summarized in **Supplementary Table 1**. Neither hematologic nor hepatic effects of the treatment were noted (**Supplementary Fig. S2**).

Patient 4 had a decrease in KPS to 40% due to the stroke during post-treatment tumor resection described above. Patient 5 maintained the baseline KPS of 80% despite the transient stroke after completion of treatment. No cognitive side effects were noted during or at the completion of the 4 treatment cycles (**Supplementary Table S1, Supplementary Fig. S1E**). A decrease in neurocognitive assessment score was noted in patient 3 after pulse 3 but recovered during pulse 4. These scores were not reflected in clinically significant cognitive deficits. A similar course was noted in patient 4 which was attributed to the overall declining health of the patient. Patient 4 had a very poor clinical course overall with only 5 months survival after CED and 13 months overall survival.

### **Additional molecular results**

**Chronic CED of TPT effectively targets proliferating tumor cells and shifts glioma phenotype.** To understand the effects of TPT infusion on specific subpopulations of glioma cells, single-sample gene set enrichment analysis (GSVA) was performed on all 86 MRI-localized biopsies using gene signatures derived from snRNAseq for distinct glioma cell states, including proliferative states (gl\_Pro1 and gl\_Pro2), Proneural states (gl\_PN1 and gl\_PN2) and Mesenchymal states (gl\_Mes1 and gl\_Mes2) (Fig. 3J). In order to fully ascertain the spectrum of treatment effects, post-CED biopsies were further stratified by whether they were inside or outside the maximum volume of distribution, as described above. When comparing post-CED biopsies taken from within the treatment volume to the pre-CED biopsies, there was a significant shift in the enrichment scores for these glioma cell states, with a significant decrease in the samples showing highest enrichment for the proliferative or proneural signatures and a significant increase in the samples showing highest enrichment for mesenchymal signatures ( $p < 0.001$ ). Notably, the majority of post-CED samples from within the treatment volume showed the highest enrichment for the gl\_Mes2 snRNAseq signature, and none showed highest enrichment for the proliferative signatures (gl\_Pro1 and gl\_Pro2). This analysis was repeated using glioma cell state gene sets derived by single-cell RNA sequencing (scRNAseq) as reported by Neftel et al, also demonstrating a significant enrichment ( $p = 0.01$ ) of mesenchymal signature after treatment (Supplementary Figure 5A), Canonical mesenchymal genes were significantly upregulated post-CED within the treatment volume, and proliferation-associated and glioma progenitor genes were significantly negatively differentially expressed (Figure 3I, Supplemental Table S5). In contrast, comparing the pre-CED samples to the post-CED samples taken outside the treatment volume did not show a significant change in the distribution of enrichment scores for the glioma cell state signatures ( $p = 0.07$ ). These results show that chronic CED of TPT causes a significant depletion of proliferating/proneural signatures and an increase in mesenchymal signatures selectively within the treatment volume.

Supplemental Figure S1

**A**

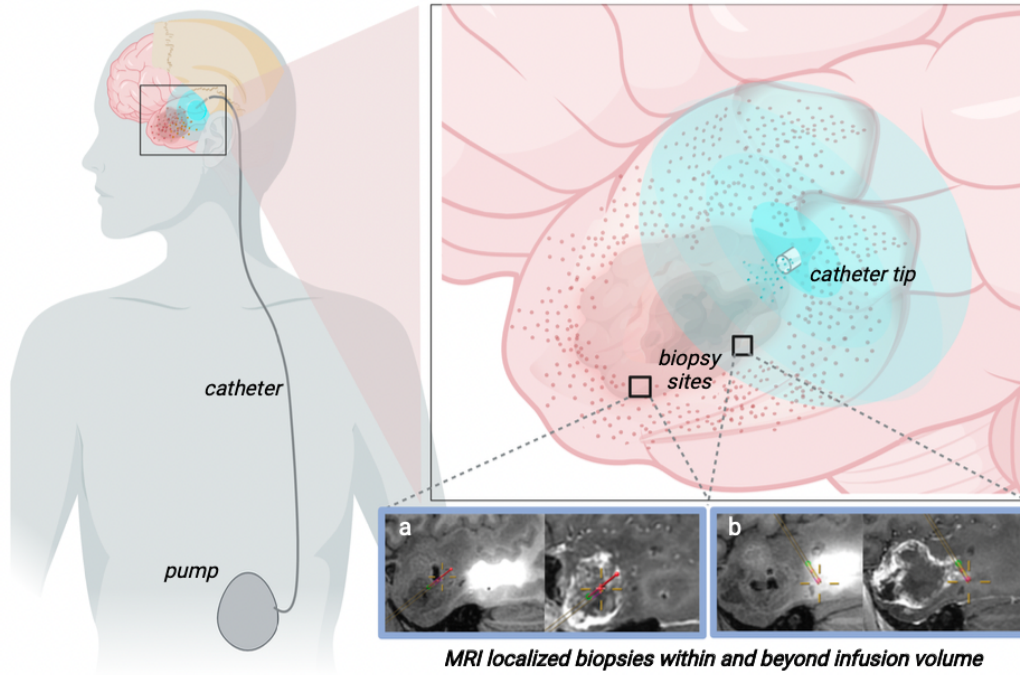

**B**

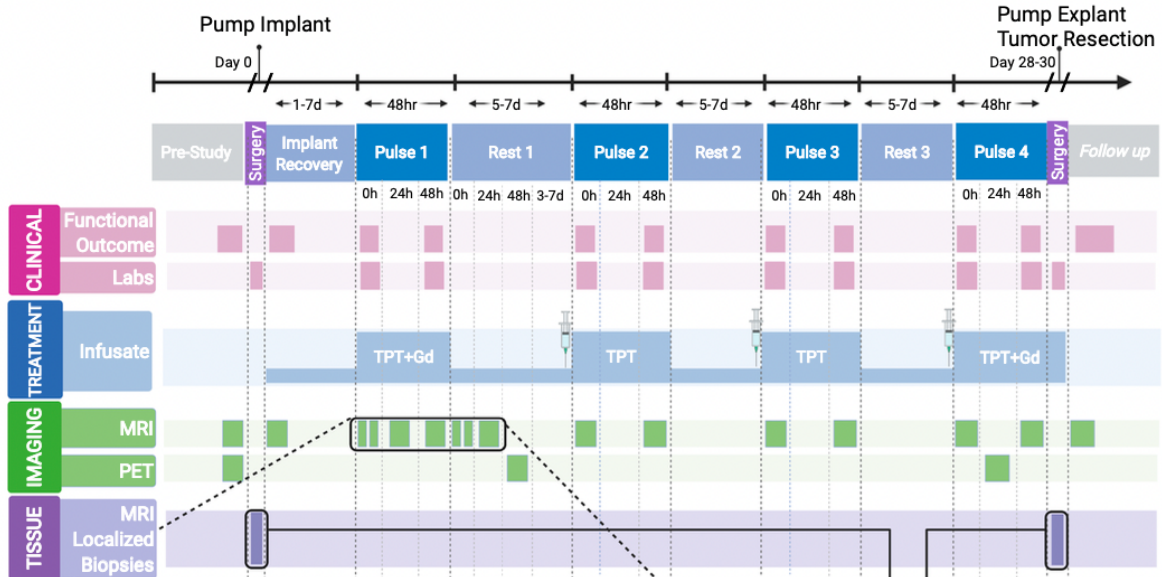

**C**

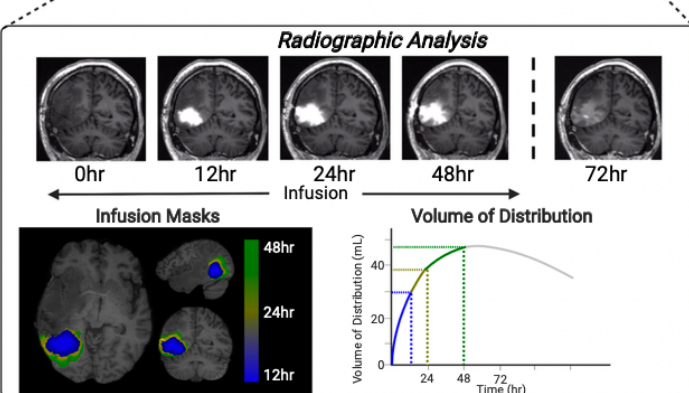

**D**

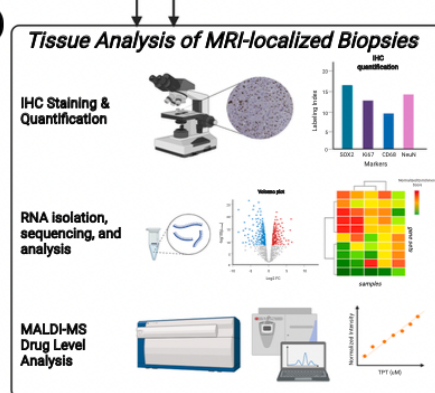

**A:** Overview of the implantable chronic CED pump-catheter system, as well as drug infusion and acquisition of MRI-localized biopsies. Clinical Trial Protocol is available as part of the Supplementary Material. A thin catheter was stereotactically placed midway between the tumor margin and the margin of the expected resection cavity, connected to silastic tubing that was tunneled subcutaneously and connected to a microinfusion pump implanted into the abdomen. MRI-localized biopsies were taken both at time of catheter implant and after treatment at explant. At explant, biopsies were taken both within and outside the volume of infused contrast. **B:** Schematic timeline describing the overall flow of the clinical trial. Patients enrolled in the trial underwent a baseline MRI and PET scan prior to undergoing stereotactically MRI-guided biopsies and implantation of the catheter with subcutaneous pump placement. TPT was delivered over 48 hours at 200 uL/mL in 4 cycles, with the pump refilled subcutaneously before cycles 2, 3 and 4 (syringe), and 5-7 days of rest between infusions. MRIs were performed at set time points throughout the four cycles. Functional outcome measurements, physical exams, and basic lab panels were collected and assessed throughout the duration of treatment. At the completion of the 4 cycles the pump was explanted, further MRI-localized biopsies were acquired, and the tumor was resected. **C:** Several MRIs were performed during the first pulse of TPT+Gd to characterize volume of distribution of the infusate, as well as to build radiographically-defined maximum infusion masks for further analyses. **D:** MRI localized biopsies collected before and after CED underwent tissue analysis, including immunohistochemical staining and quantification, as well as RNA isolation, sequencing and analysis. On a small subset of these biopsies, MALDI-MSI was performed to quantify concentration of TPT in the tissue after infusion.

Supplemental Figure S2

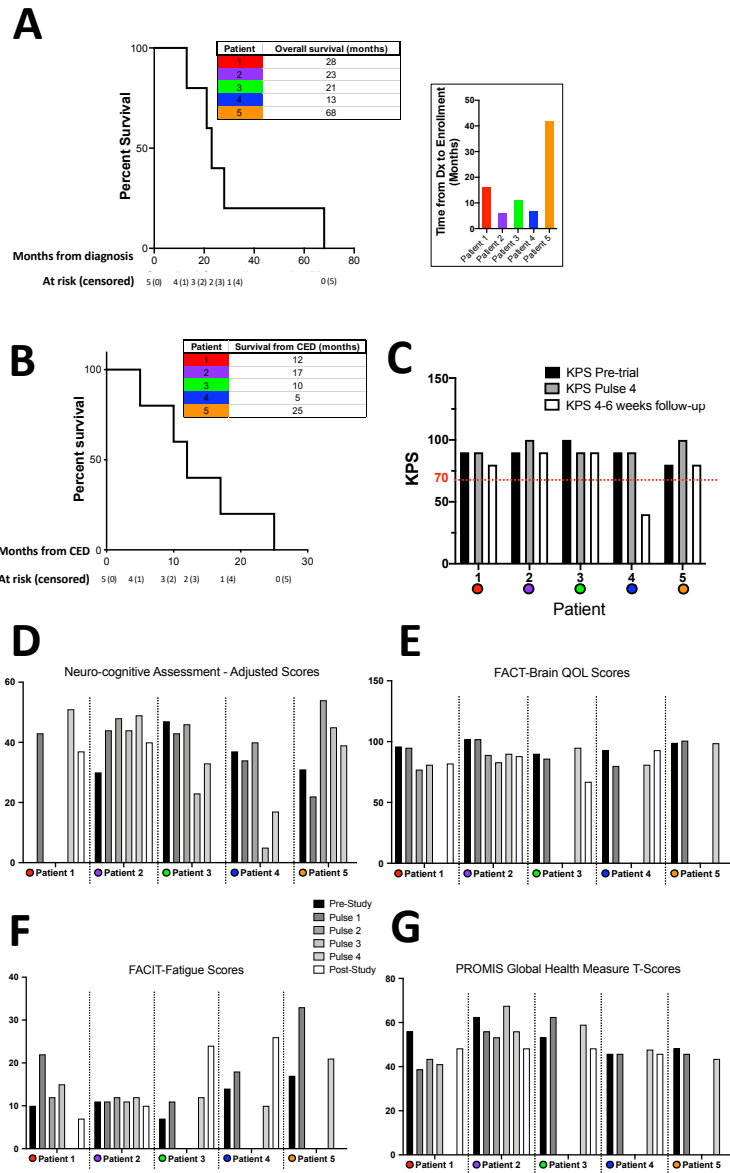

**A:** Kaplan Meier curve demonstrating overall survival from initial diagnosis, with accompanying bar graph depicting time from initial diagnosis to enrollment in the clinical trial /overall survival. **B:** Kaplan Meier curve demonstrating survival from initiation of CED TPT. **C:** Bar graphs showing KPS scores pre-trial, at the end of Pulse 4 and at 4-6 weeks follow-up. Red line marks a KPS of 70 considered to be the cutoff for significant changes in functional status. **D:** Bar graphs showing neurocognitive assessments throughout treatment. **E-G:** Bar graphs showcasing QoL assessment scores throughout treatment for all 5 patients.



**Supplemental Figure S3**

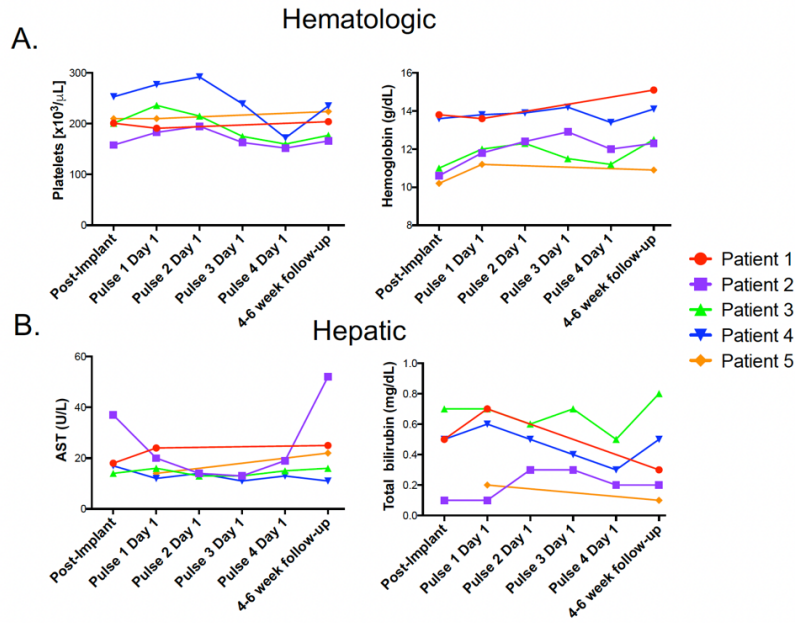

**A-B:** Laboratory values throughout the 4 pulses for platelets, hemoglobin, AST and total bilirubin to demonstrate systemic hematologic and hepatic safety.

**Supplemental Figure S4**

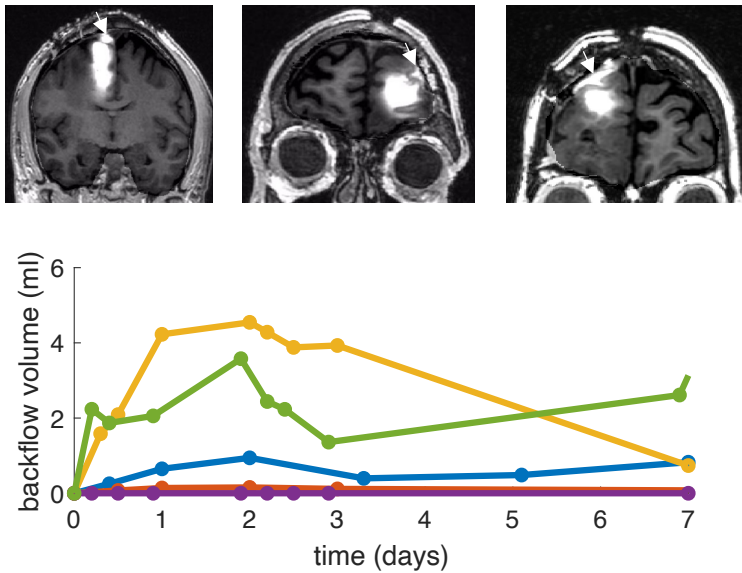

A small volume of contrast flowed back along the catheter to the brain surface (white arrows), with a time course similar to the volume infused into the brain. The maximum backflow volume was 8.8% (1.8 mL) of the volume infused into the brain suggesting that most of the drug was successfully delivered to the targeted tissue.



**Supplemental Figure S5**

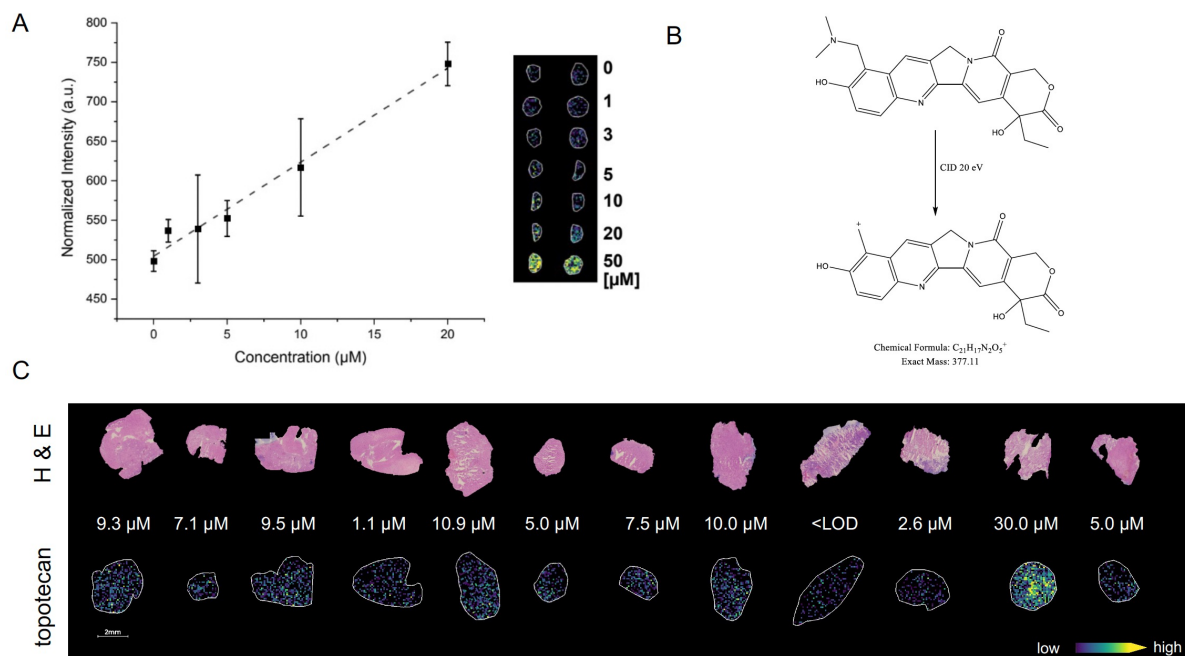

**A:** Calibration curve for TPT MALDI MSI quantification with an  $R^2 = 0.984$ . **B:** The chemical structure of TPT precursor and product ion used for tissue quantification. **C:** H&E and TPT ion image of 12 post-CED biopsies, accompanied by estimates of average TPT concentration for each sample with detectable levels of TPT with maximum pixel values above the LOD (3.2  $\mu\text{M}$ ).

Supplemental Figure S6

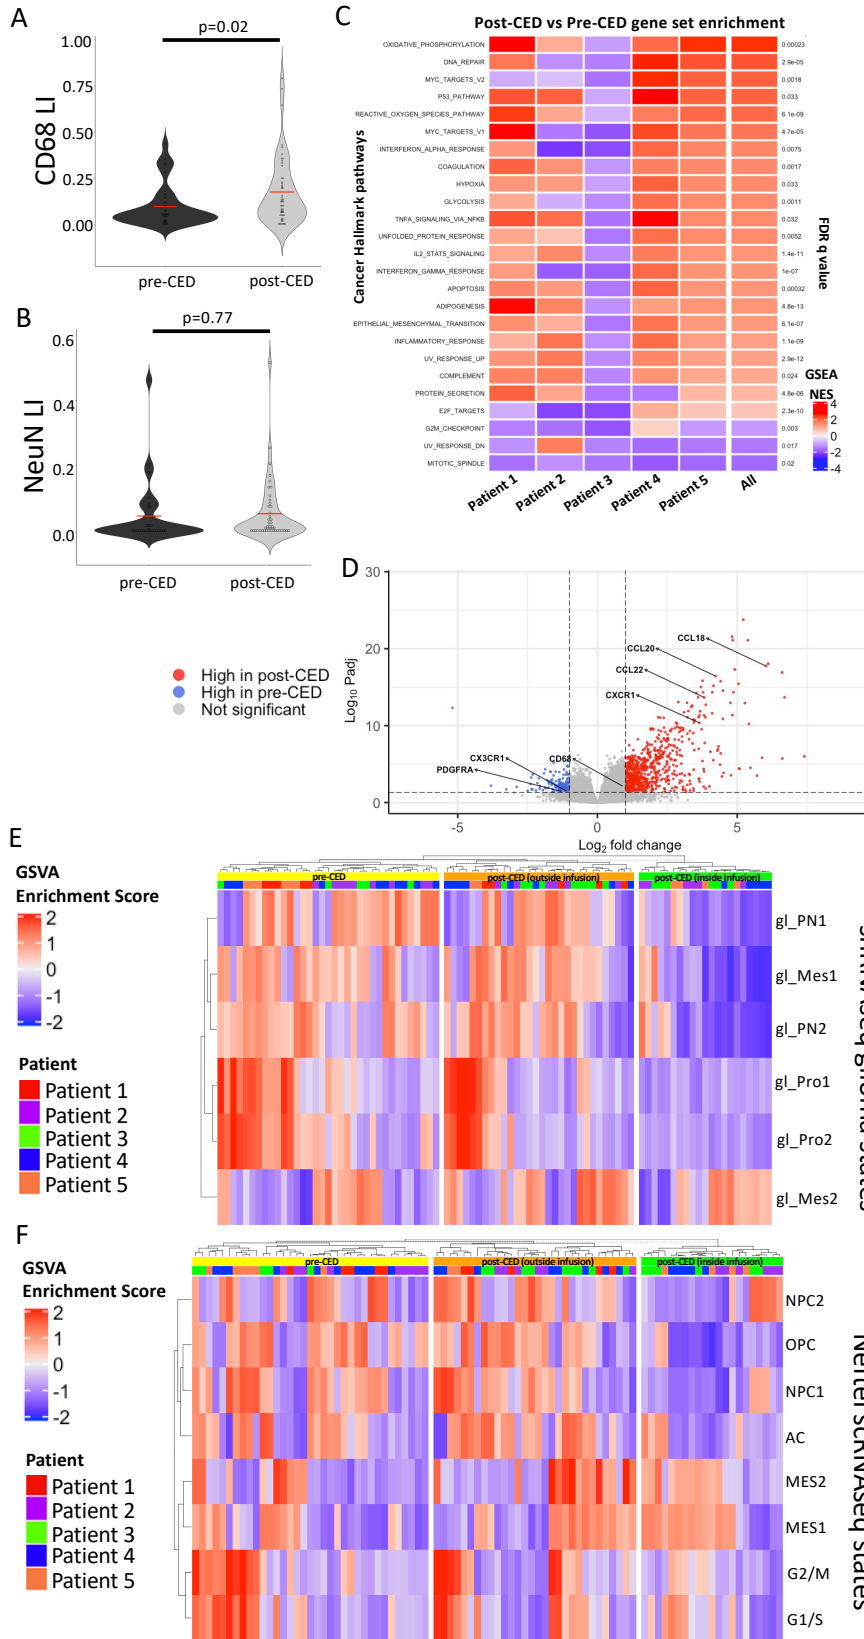

**A:** Violin plot displaying quantification of CD68 by labeling index across all MRI-localized biopsies from all patients, comparing biopsies taken pre- and post-CED using a student's T-test (n=87). **B:** Violin plot displaying quantification of NeuN by labeling index across all MRI-localized biopsies from all patients, comparing biopsies taken pre- and post-CED using a student's T-test (n=87). **C:** Heatmap displaying patient-by-patient gene set enrichment analysis (GSEA) comparing MRI-localized biopsies before and after treatment for MSigDb "Cancer Hallmarks" ontologies. Red indicates a pathway is enriched post-CED, while blue indicates the pathway is enriched pre-CED. Significantly enriched gene sets across all patients via Fisher integration are displayed on the left of the heatmap, with the corresponding adjusted FDR q-value to the right. **D:** Volcano plot displaying differentially expressed genes between pre-CED and post-CED MRI-localized biopsies within volume of treatment across all 5 patients (n = 56). Cutoffs were log<sub>2</sub>-fold-change > |1| and adjusted p-value < 0.05. Select significantly differentially expressed lineage-associated genes are marked. **E:** Heatmap displaying GSEA analysis of MRI-localized biopsies for six snRNAseq-derived glioma cell state signatures. GSEA scores for a given gene set are scaled across all samples. On the top of the heatmap, each biopsy is annotated by patient, as well as whether the biopsy was taken pre-CED or post-CED. The post-CED biopsies were further radiographically stratified by whether they were inside or outside the maximum volume of distribution. GSEA scores for a given gene set are scaled across all samples. On the top of the heatmap, each biopsy is annotated by patient, as well as whether the biopsy was taken pre-CED or post-CED. The post-CED biopsies were further radiographically stratified by whether they were inside or outside the maximum volume of distribution. **F:** Same analysis as E except with Neftel et al scRNAseq-derived glioma state signatures.

### References for Supplementary Appendix

1. Jenkinson M, Beckmann CF, Behrens TE, Woolrich MW, Smith SM. *Fsl. Neuroimage.* 2012;62(2):782-90.
2. Love MI, Huber W, Anders S. Moderated estimation of fold change and dispersion for RNA-seq data with DESeq2. *Genome Biol.* 2014;15(12):550.
3. Blighe K, Rana S, Lewis M. Enhanced Volcano: Publication-ready volcano plots with enhanced colouring and labeling. R Package Version 1. 2019.
4. Hanzelmann S, Castelo R, Guinney J. GSEA: gene set variation analysis for microarray and RNA-seq data. *BMC Bioinformatics.* 2013;14:7.
5. Al-Dalahmah O, Argenziano M, Boyett D, Save A, Mahajan A, Khan F, et al. Re-convolving the compositional landscape of primary and recurrent glioblastoma using single nucleus RNA sequencing. *bioRxiv.* 2021.
6. Neftel C, Laffy J, Filbin MG, Hara T, Shore ME, Rahme GJ, et al. An Integrative Model of Cellular States, Plasticity, and Genetics for Glioblastoma. *Cell.* 2019;178(4):835-49 e21.
7. Groseclose MR, Castellino S. A mimetic tissue model for the quantification of drug distributions by MALDI imaging mass spectrometry. *Anal Chem.* 2013;85(21):10099-106.
8. Chaudhuri S, Fowler MJ, Baker C, Stopka SA, Regan MS, Sablatura L, et al. beta-Cyclodextrin-poly (beta-Amino Ester) Nanoparticles Are a Generalizable Strategy for High Loading and Sustained Release of HDAC Inhibitors. *ACS Appl Mater Interfaces.* 2021;13(18):20960-73.
9. Marin BM, Porath KA, Jain S, Kim M, Conage-Pough JE, Oh JH, et al. Heterogeneous delivery across the blood-brain barrier limits the efficacy of an EGFR-targeting antibody drug conjugate in glioblastoma. *Neuro Oncol.* 2021;23(12):2042-53.

| Patient   | Sex | Race  | Initial Diagnosis              |
|-----------|-----|-------|--------------------------------|
| Patient 1 | M   | White | Anaplastic astrocytoma Grade 3 |
| Patient 2 | F   | White | GBM Grade 4                    |
| Patient 3 | M   | White | GBM Grade 4                    |
| Patient 4 | M   | White | GBM Grade 4                    |
| Patient 5 | F   | White | GBM Grade 4                    |

| Patient   | Tumor Location | Tumor Size         | Date first resection |
|-----------|----------------|--------------------|----------------------|
| Patient 1 | R, Frontal     | 1.6 x 1.5 x 1.9 cm | 9/8/16               |
| Patient 2 | R, Temporal    | 4.0 x 2.8 cm       | 3/14/18              |
| Patient 3 | L, Frontal     | 2.3 x 2.2 cm       | 2/23/18              |
| Patient 4 | R, Temporal    | 2.0 x 1.6 cm       | 6/22/18              |
| Patient 5 | R, Frontal     | 3.5 x 2.6 cm       | 12/16/15             |

| Patient   | Age at diagnosis | Date of pump placement | Age at enrollment |
|-----------|------------------|------------------------|-------------------|
| Patient 1 | 2/2/00           | 1/22/18                | 34                |
| Patient 2 | 2/26/00          | 9/17/18                | 58                |
| Patient 3 | 2/29/00          | 1/24/19                | 61                |
| Patient 4 | 2/25/00          | 2/14/19                | 56                |
| Patient 5 | 2/17/00          | 7/8/19                 | 51                |

| Patient   | Time Dx to enrollment (months) | Date of pump explant/resection | Date of Death |
|-----------|--------------------------------|--------------------------------|---------------|
| Patient 1 | 16                             | 2/22/18                        | 2/2/19        |
| Patient 2 | 6                              | 10/12/18                       | 3/4/20        |
| Patient 3 | 11                             | 2/20/19                        | 12/16/19      |
| Patient 4 | 7                              | 3/11/19                        | 7/23/19       |
| Patient 5 | 42                             | 7/31/19                        | 8/20/21       |

| Patient   | Time from first CED to Death (months) | Overall survival (months) |
|-----------|---------------------------------------|---------------------------|
| Patient 1 | 12                                    | 28                        |
| Patient 2 | 17                                    | 23                        |
| Patient 3 | 10                                    | 21                        |
| Patient 4 | 5                                     | 13                        |
| Patient 5 | 25                                    | 68                        |

| Patient   | Prior Treatments                                                                                                                                                                                                                                                                                                                                                                                                    |
|-----------|---------------------------------------------------------------------------------------------------------------------------------------------------------------------------------------------------------------------------------------------------------------------------------------------------------------------------------------------------------------------------------------------------------------------|
| Patient 1 | <ul style="list-style-type: none"> <li>• Concurrent RT/Temozolomide – 11/3/16 – 12/14/16</li> <li>• Adjuvant Temozolomide – January 2017 – 11/11/17 (11 cycles completed)</li> </ul>                                                                                                                                                                                                                                |
| Patient 2 | <ul style="list-style-type: none"> <li>• Concurrent RT/Temozolomide – 4/10/18 – 5/21/18</li> <li>• Neratinib 240mg PO daily (INSIGHT R5763 Trial) – 6/19/18 – 8/14/18</li> <li>• Concurrent RT/Temozolomide – 3/25/18 – 5/7/18</li> </ul>                                                                                                                                                                           |
| Patient 3 | <ul style="list-style-type: none"> <li>• Adjuvant Temozolomide (5 cycles) – 6/7/18 – 12/15/18</li> <li>• Pembrolizumab (Keytruda) IV – 4/10/18 – 4/10/18</li> <li>• Optune – 7/4/18 – 8/8/18</li> <li>• (Atorvastatin, Pravastatin, Doxycycline, Mebendazole, Metformin) + Astragalus – 7/22/18 – 8/31/19</li> <li>• Concurrent RT/Temozolomide – 7/23/18 – 8/31/18</li> <li>• Optune – 9/10/18 – 2/7/19</li> </ul> |
| Patient 4 | <ul style="list-style-type: none"> <li>• Adjuvant Temozolomide (4 cycles) – 10/1/18 – 12/28/18</li> <li>• Concurrent RT/Temozolomide – 1/13/16 – 2/25/16</li> <li>• Adjuvant Temozolomide – 4/5/16 – 9/18/16</li> <li>• Opdivo – 1/26/16 – 1/30/18</li> <li>• Optune – 4/8/16 – 6/10/19</li> </ul>                                                                                                                  |
| Patient 5 | <ul style="list-style-type: none"> <li>• Optune – 4/8/16 – 6/10/19</li> </ul>                                                                                                                                                                                                                                                                                                                                       |

|           | Primary tumor                                                                                                                                                                                                                                                                                                                                                                                                                                                                                                                             |                                                                                            | Recurrent tumor                                                                                                                                                                                                                                                                                                                                                                                                                                                                                                                                                                                                                   |                                                                                                                                                                                                                                                                                                                                                                                                                                                                                                                                                                                                                                  |                                                                    |
|-----------|-------------------------------------------------------------------------------------------------------------------------------------------------------------------------------------------------------------------------------------------------------------------------------------------------------------------------------------------------------------------------------------------------------------------------------------------------------------------------------------------------------------------------------------------|--------------------------------------------------------------------------------------------|-----------------------------------------------------------------------------------------------------------------------------------------------------------------------------------------------------------------------------------------------------------------------------------------------------------------------------------------------------------------------------------------------------------------------------------------------------------------------------------------------------------------------------------------------------------------------------------------------------------------------------------|----------------------------------------------------------------------------------------------------------------------------------------------------------------------------------------------------------------------------------------------------------------------------------------------------------------------------------------------------------------------------------------------------------------------------------------------------------------------------------------------------------------------------------------------------------------------------------------------------------------------------------|--------------------------------------------------------------------|
|           | Stereotactic biopsy                                                                                                                                                                                                                                                                                                                                                                                                                                                                                                                       | Catheter explant/tumor resection                                                           |                                                                                                                                                                                                                                                                                                                                                                                                                                                                                                                                                                                                                                   |                                                                                                                                                                                                                                                                                                                                                                                                                                                                                                                                                                                                                                  |                                                                    |
|           | IHC                                                                                                                                                                                                                                                                                                                                                                                                                                                                                                                                       | IHC                                                                                        | IHC                                                                                                                                                                                                                                                                                                                                                                                                                                                                                                                                                                                                                               |                                                                                                                                                                                                                                                                                                                                                                                                                                                                                                                                                                                                                                  |                                                                    |
| Patient   | IHC                                                                                                                                                                                                                                                                                                                                                                                                                                                                                                                                       | Molecular pathology                                                                        | Molecular pathology                                                                                                                                                                                                                                                                                                                                                                                                                                                                                                                                                                                                               | Molecular pathology                                                                                                                                                                                                                                                                                                                                                                                                                                                                                                                                                                                                              |                                                                    |
| Patient 1 | Diffusely infiltrating glial neoplasm of variably increased cellularity. The tumor cells show prominent nuclear pleomorphism with some tumor cells having large and markedly atypical nuclei. Three mitotic figure is seen. Vascular proliferation and necrosis are not identified. The Ki67 proliferation index is increased, with up to 3.2% (32/1000) of cells staining positive. Glial fibrillary acidic protein (GFAP): diffusely positive Epidermal growth factor receptor (EGFR): strongly positive Phosphatase and tensin homolog | IDH1 wt, MGMT unmethylated, - EGFR Amplification, Chromosome 7 polysomy, - 1p/19q deletion | Varying amounts of hypercellularity in brain parenchyma with scattered cells showing nuclear atypia indicative of infiltrating glioma cells. No mitotic figures were seen but the Ki-67 proliferative index was elevated up to approximately 6%. Reactive changes and hyalinized vasculature were seen, consistent with treatment effect. Mutated isocitrate dehydrogenase-1 (IDH-1; R132H mutation): Negative Alpha thalassaemia/mental retardation syndrome X-linked (ATRX): Labels a subset of nuclei Epidermal growth factor receptor (EGFR): Weakly stains a subset of cells Phosphatase and tensin homolog (PTEN): Negative | Variability in cellularity with glioma-infiltrated brain parenchyma and marked treatment effect that is causing necrosis, astrogliosis and microgliosis most prominent in the area adjacent to the catheter. The proliferation index varies across the specimen, and is highest in regions furthest from the catheter, in the most rostral portion of the specimen, where a Ki67 labeling index of up to 19% is seen. The Ki-67 proliferation index is elevated up to 12.0% (120 labeled cells of 1000 total cells). Glial fibrillary acidic protein (GFAP): Diffusely positive; highlights reactive gliosis Sox-2: Highlights a | IDH1 wt, MGMT unmethylated, + TERT, - EGFR VIII, - 1p/19q deletion |

|                                                                                                                                                                                                                                                                                                                                                                                                                                                                                                                     |                                                                                                 |                                                                                                                                                                                                                                                                                                                                                                                                                                                                                                                                                                                                                                                      |                                                                                                                                                                                                                                                                                                                                                                                                                                                                                                                                                                                               |
|---------------------------------------------------------------------------------------------------------------------------------------------------------------------------------------------------------------------------------------------------------------------------------------------------------------------------------------------------------------------------------------------------------------------------------------------------------------------------------------------------------------------|-------------------------------------------------------------------------------------------------|------------------------------------------------------------------------------------------------------------------------------------------------------------------------------------------------------------------------------------------------------------------------------------------------------------------------------------------------------------------------------------------------------------------------------------------------------------------------------------------------------------------------------------------------------------------------------------------------------------------------------------------------------|-----------------------------------------------------------------------------------------------------------------------------------------------------------------------------------------------------------------------------------------------------------------------------------------------------------------------------------------------------------------------------------------------------------------------------------------------------------------------------------------------------------------------------------------------------------------------------------------------|
| <p>virtuously infiltrating hypercellular glial neoplasm with numerous mitotic figures, glomeruloid vasculature and occasionally pseudopalisading necrosis. Scattered microcalcifications are seen. The neoplastic cells are moderately pleomorphic with hyperchromatic nuclei. Ki-67 is variably increased with up to approximately 30-40% of tumor cells. Mutated isocitrate dehydrogenase-1 (IDH-1; R132H mutation): Negative Alpha thalassemia/mental retardation syndrome X-linked (ATRX): <i>Præservat</i></p> | <p>IDH1 wt, MGMT unmethylated, + TERT, - EGFR vIII, - 1p/19q deletion</p>                       | <p>Diffusely infiltrating glioma in the setting of treatment effect. reactive astrocytosis (highlighted with immunostains for GFAP), patchy microgliosis (highlighted with immunostains for CD68) and a modest lymphocytic infiltrate (highlighted with immunostains for CD3). A subset of tumor cells show marked cellular atypia with large hyperchromatic nuclei. Gemistocytes, with abundant eosinophilic cytoplasm are also seen. No mitotic figures are seen. No glomeruloid-type vascular proliferation is identified, however reactive vascular changes, including thick hyalinized vessels, are noted. Necrosis is also seen. The Ki-67</p> | <p>diffusely infiltrating glioma and reactive changes consistent with treatment effect. In some areas the recurrent glial neoplasm exhibits the histopathologic hallmarks of glioblastoma, with marked nuclear atypia, pseudo-palisading necrosis, and microvascular proliferation. Many areas also show reactive changes associated with treatment effects, including fibrosis, vascular hyalinization, lymphocytic inflammation, and numerous macrophages. Neoplastic cells show fibrillary processes in some areas and have hyperchromatic pleomorphic nuclei. Mitotic figures are not</p> |
| <p>Patient 2</p>                                                                                                                                                                                                                                                                                                                                                                                                                                                                                                    | <p>IDH1 wt, MGMT unmethylated, - TERT, - EGFR vIII, + EGFR amplification, - 1p/19q deletion</p> | <p>diffusely infiltrating glioma and reactive changes consistent with treatment effect. In some areas the recurrent glial neoplasm exhibits the histopathologic hallmarks of glioblastoma, with marked nuclear atypia, pseudo-palisading necrosis, and microvascular proliferation. Many areas also show reactive changes associated with treatment effects, including fibrosis, vascular hyalinization, lymphocytic inflammation, and numerous macrophages. Neoplastic cells show fibrillary processes in some areas and have hyperchromatic pleomorphic nuclei. Mitotic figures are not</p>                                                        | <p>IDH1 wt, MGMT unmethylated, - TERT, - EGFR vIII, + EGFR amplification, - 1p/19q deletion</p>                                                                                                                                                                                                                                                                                                                                                                                                                                                                                               |



|                                                                                                                                                                                                                                                                                                                                                                                                                                                                                                            |                                                      |                                                                                                                                                                                                                                                                                                                                                                                                                                                                                                                                                                                                                                                         |                                                                                                                                                                                                                                                                                                                                                                                                                                                                                                                                                                                                    |
|------------------------------------------------------------------------------------------------------------------------------------------------------------------------------------------------------------------------------------------------------------------------------------------------------------------------------------------------------------------------------------------------------------------------------------------------------------------------------------------------------------|------------------------------------------------------|---------------------------------------------------------------------------------------------------------------------------------------------------------------------------------------------------------------------------------------------------------------------------------------------------------------------------------------------------------------------------------------------------------------------------------------------------------------------------------------------------------------------------------------------------------------------------------------------------------------------------------------------------------|----------------------------------------------------------------------------------------------------------------------------------------------------------------------------------------------------------------------------------------------------------------------------------------------------------------------------------------------------------------------------------------------------------------------------------------------------------------------------------------------------------------------------------------------------------------------------------------------------|
| <p>virtuously infiltrating glial neoplasm with areas of high cellularity, glomeruloid vascular proliferation and necrosis. Numerous mitotic figures are identified. The tumor cells are atypical and have pleomorphic hyperchromatic nuclei. In areas, prominent perivascular lymphocytic infiltrates are noted. Ki67 proliferation index is variably increased, with up to approximately 30% of tumor cells. Mutated isocitrate dehydrogenase-1 (IDH-1; R132H mutation): negative p53: accumulated in</p> | <p>IDH1 wt, MGMT methylated, + TERT, - EGFR VIII</p> | <p>Recurrent high grade glioma with variable mitotic activity, atypia, and increased cellularity. The Ki67 labeling index is increased, with up to 30-40% contralateral to prior tumor, and 5-10% ipsilateral to prior tumor. Treatment associated changes including astrogliosis, microgliosis, vascular hyalinization, and foamy macrophages are variably represented in the biopsies. No necrosis is seen. Glomeruloid-type vascular proliferation is not identified, however, hypertrophic reactive-type vasculature is evident. Mutated isocitrate dehydrogenase-1 (IDH-1; R132H mutation): Negative ATRX: Preserved P53: Positive in a subset</p> | <p>Diffusely infiltrating glial neoplasm, with areas of high cellularity and pleomorphism, amid many areas showing gliosis, numerous macrophages, necrosis, vascular hyalinization, and perivascular inflammation. The leptomeninges are edematous, fibrotic, and inflamed. Pseudo-palisading necrosis and glomeruloid vascular proliferation are not evident. The neoplastic cells show fibrillary processes in some areas and have hyperchromatic, pleomorphic nuclei. Occasional mitotic figures are seen. The Ki67 proliferation index is variably increased, with up to approximately 20%</p> |
| <p><b>Patient 3</b></p>                                                                                                                                                                                                                                                                                                                                                                                                                                                                                    |                                                      |                                                                                                                                                                                                                                                                                                                                                                                                                                                                                                                                                                                                                                                         |                                                                                                                                                                                                                                                                                                                                                                                                                                                                                                                                                                                                    |

|                                  |                                                       |                                                                                                                                                                                                                                                                                                                                                                                                                                                                                                                                                                                                                                                                                |                                                       |
|----------------------------------|-------------------------------------------------------|--------------------------------------------------------------------------------------------------------------------------------------------------------------------------------------------------------------------------------------------------------------------------------------------------------------------------------------------------------------------------------------------------------------------------------------------------------------------------------------------------------------------------------------------------------------------------------------------------------------------------------------------------------------------------------|-------------------------------------------------------|
| Patient 4 surgery performed at ( | <p>IDH1 wt, MGMT unmethylated, + TERT, -EGFR VIII</p> | <p>A highly cellular, partially necrotic, primitive appearing neoplasm arranged in nests, cords, and sheets with deposition of myxoid matrix in the background. The neoplastic cells are highly atypical, with high nuclear to cytoplasmic ratios and a small amounts of eosinophilic cytoplasm. Only few cells show fibrillar processes. The nuclei are irregular, round to oval, hyperchromatic, with no conspicuous nucleoli, and show molding in many areas. In some areas, the neoplastic cells show more noticeable cytoplasm with eccentric nuclei. In other areas, gemistocytic cells are noted. There are abundant mitotic figures. Multiple areas with apoptotic</p> | <p>IDH1 wt, MGMT unmethylated, + TERT, -EGFR VIII</p> |
|                                  |                                                       | <p>Highly cellular, biphasic glial neoplasm arranged in nests, cords, and sheets in a background of rarefied white matter containing gemistocytes and inflammatory cells. Geographic necrosis, pseudopalisading necrosis and glomeruloid vascular proliferation are seen. The predominant population of neoplastic cells has high nuclear to cytoplasmic ratios and a small amount of eosinophilic cytoplasm. The nuclei are irregular, round to oval, hyperchromatic, with no conspicuous nucleoli, and may show molding. Frequent mitoses are noted. The Ki-67 proliferation index is variably increased, with labeling up to 50%.</p>                                       |                                                       |

|                                                                                                                                                                                                                                                                                                                                                                                                                                                                                                                                                                                   |                                                                          |                                                                                                                                                                                                                                                                                                                                                                                                                                                                                                                                                                                                                                                                             |                                                                                                                                                                                                                                                                                                                                                                                                                                                                                                                                                                                                                    |
|-----------------------------------------------------------------------------------------------------------------------------------------------------------------------------------------------------------------------------------------------------------------------------------------------------------------------------------------------------------------------------------------------------------------------------------------------------------------------------------------------------------------------------------------------------------------------------------|--------------------------------------------------------------------------|-----------------------------------------------------------------------------------------------------------------------------------------------------------------------------------------------------------------------------------------------------------------------------------------------------------------------------------------------------------------------------------------------------------------------------------------------------------------------------------------------------------------------------------------------------------------------------------------------------------------------------------------------------------------------------|--------------------------------------------------------------------------------------------------------------------------------------------------------------------------------------------------------------------------------------------------------------------------------------------------------------------------------------------------------------------------------------------------------------------------------------------------------------------------------------------------------------------------------------------------------------------------------------------------------------------|
| <p><b>Patient 5</b></p> <p>Diffusely infiltrating glial neoplasm with areas of high cellularity and frequent mitotic figures. A small focus of glomeruloid vascular proliferation and pseudopalisading necrosis. The neoplastic cells are atypical and highly pleomorphic, with angulated, hyperchromatic nuclei. Bizarre, occasionally multinucleated, giant cells are scattered throughout the specimens. The Ki67 proliferation index is variably increased, with up to 22.8% of cells staining positive. Glial fibrillary acidic protein (GFAP): <i>strongly positive</i></p> | <p>IDH1 wt, MGMT methylated, + TERT, + EGFR vlll, no 1p/19q deletion</p> | <p>Diffusely infiltrating glial neoplasm with areas of increased cellularity, frequent mitotic figures, and robust microvascular proliferation. Frank necrosis is not seen. The tumor cells are atypical and highly pleomorphic. The Ki67 proliferation index is variably increased, with focally up to 40% of tumor cells staining positive. On parts C, D, E, and F, highly atypical tumor cells with similar morphology extensively involve brain parenchyma, which appear to be the infiltrating border of the tumor. Glial fibrillary acidic protein (GFAP): diffusely, strongly positive<br/>Mutated isocitrate dehydrogenase-1 (IDH-1; R132H mutation): negative</p> | <p>neoplasm with variably-increased cellularity. Treatment effects are evident where an acutely necrotic cavitating lesion involving cortex and white matter surrounded by many macrophages is present; however, scattered atypical cells are also still seen. There are regions of high cellularity in the adjacent tissue, with many atypical cells and microvascular proliferation. The tumor cells have hyperchromatic, pleomorphic nuclei and frequent mitotic figures are seen. Microvascular proliferation including glomeruloid forms is seen. No palisading necrosis is evident. A combined GFAP-SOX2</p> |
|                                                                                                                                                                                                                                                                                                                                                                                                                                                                                                                                                                                   | <p>IDH1 wt, MGMT methylated, + TERT, - EGFR vlll, no 1p/19q deletion</p> |                                                                                                                                                                                                                                                                                                                                                                                                                                                                                                                                                                                                                                                                             |                                                                                                                                                                                                                                                                                                                                                                                                                                                                                                                                                                                                                    |

| Patient   | Symptoms at enrollment                                                                                                                                                                                           | Symptoms end of trial                                                                                                                                                                                                                                                                                                                                                                                                                                                                                                                                                                                                                                                                                                                                                                                                                                                                 |
|-----------|------------------------------------------------------------------------------------------------------------------------------------------------------------------------------------------------------------------|---------------------------------------------------------------------------------------------------------------------------------------------------------------------------------------------------------------------------------------------------------------------------------------------------------------------------------------------------------------------------------------------------------------------------------------------------------------------------------------------------------------------------------------------------------------------------------------------------------------------------------------------------------------------------------------------------------------------------------------------------------------------------------------------------------------------------------------------------------------------------------------|
| Patient 1 | <ul style="list-style-type: none"> <li>•Eczema – Grade 1</li> <li>•Myalgia (left upper thigh) – Grade 1</li> <li>•Seizure disorder – Grade 2</li> <li>•Anxiety – Grade 2</li> <li>•Insomnia – Grade 1</li> </ul> | <ul style="list-style-type: none"> <li>•Pain (incision site) – Grade 2</li> <li>•Fatigue – Grade 1</li> <li>•Photophobia – Grade 1</li> <li>•Localized edema, abdomen – Grade 1</li> <li>•Sinus tachycardia – Grade 2 and 1</li> <li>•Thromboembolic event (LLE DVT) – Grade 2</li> <li>•Thromboembolic event (RLE) – Grade 2</li> <li>•Thromboembolic event (RUE) – Grade 2</li> <li>•Thromboembolic event (LUE) – Grade 2</li> <li>•Cough – Grade 1</li> <li>•Upper respiratory infection – Grade 2</li> <li>•Constipation – Grade 1</li> <li>•Weight loss – Grade 1</li> <li>•SIADH – Grade 1</li> <li>•Seizure – Grade 1</li> <li>•Supplementary motor area (SMA) syndrome – Grade 2 and 1</li> <li>•Cerebral edema – Grade 2</li> <li>•Cognitive disturbance – Grade 1</li> <li>•Headache – Grade 1</li> <li>•Hypokalemia – Grade 1</li> <li>•Hvpoaanesemia – Grade 1</li> </ul> |

|           |                                                                                                                                                                                                                                                                                                                                                                                                                                                                                                                                                                                                                                                                                                                                                                                                                                                                                                                                                                                                                                                                                                                  |                                                                                                                                                                                                                                                                                                                                    |
|-----------|------------------------------------------------------------------------------------------------------------------------------------------------------------------------------------------------------------------------------------------------------------------------------------------------------------------------------------------------------------------------------------------------------------------------------------------------------------------------------------------------------------------------------------------------------------------------------------------------------------------------------------------------------------------------------------------------------------------------------------------------------------------------------------------------------------------------------------------------------------------------------------------------------------------------------------------------------------------------------------------------------------------------------------------------------------------------------------------------------------------|------------------------------------------------------------------------------------------------------------------------------------------------------------------------------------------------------------------------------------------------------------------------------------------------------------------------------------|
| Patient 2 | <ul style="list-style-type: none"> <li>• Fatigue – Grade 1</li> <li>• Elevated intraocular pressure – Grade 1</li> <li>• Ptosis (left eye) – Grade 1</li> <li>• Tinnitus – Grade 1</li> <li>• Alopecia – Grade 1</li> <li>• Dry eye – Grade 2</li> <li>• Blepharitis – Grade 1</li> <li>• Left hemianopsia – Grade 1</li> <li>• Pruritus – Grade 1</li> <li>• Sinus bradycardia – Grade 1</li> <li>• Flatulence – Grade 1</li> <li>• Dyspepsia – Grade 2</li> <li>• Constipation – Grade 2</li> <li>• Arthritis – Grade 1</li> <li>• Seizure disorder – Grade 2</li> <li>• Headache – Grade 1</li> <li>• Depression – Grade 2</li> <li>• Anxiety – Grade 2</li> <li>• Lymphocyte count decreased – Grade 2</li> <li>• Platelets decreased – Grade 1</li> <li>• Fatigue – Grade 1</li> <li>• Hearing impaired – Grade 2</li> <li>• Thromboembolic event (Pulmonary embolism) – Grade 3</li> <li>• Atrial fibrillation – Grade 2</li> <li>• Hyperlipidemia – Grade 2</li> <li>• Factor 5 Leiden mutation (heterozygous type) – Grade 2</li> <li>• Back pain – Grade 2</li> <li>• Osteoporosis – Grade 2</li> </ul> | <ul style="list-style-type: none"> <li>• Pain (incision site) – Grade 2 and 1</li> <li>• Blurred vision – Grade 1</li> <li>• Lip infection – Grade 2</li> <li>• Constipation – Grade 2</li> <li>• Hemorrhoids – Grade 2 and 1</li> <li>• Cerebral edema – Grade 2</li> <li>• Lymphocyte count decreased – Grade 3 and 2</li> </ul> |
| Patient 3 | <ul style="list-style-type: none"> <li>• Pain (incision site) – Grade 2</li> <li>• Insomnia – Grade 2</li> <li>• Sinus bradycardia – Grade 1</li> <li>• Nausea – Grade 2</li> <li>• Cerebral edema – Grade 2</li> <li>• Headache – Grade 1</li> </ul>                                                                                                                                                                                                                                                                                                                                                                                                                                                                                                                                                                                                                                                                                                                                                                                                                                                            |                                                                                                                                                                                                                                                                                                                                    |

|           |                                                                                                                                                                                                                                                                                                                                   |                                                                                                                                                                                                                                                                                                                                                                                                                                                                                                                                                                                                                                                                                                                                                                                                                                     |
|-----------|-----------------------------------------------------------------------------------------------------------------------------------------------------------------------------------------------------------------------------------------------------------------------------------------------------------------------------------|-------------------------------------------------------------------------------------------------------------------------------------------------------------------------------------------------------------------------------------------------------------------------------------------------------------------------------------------------------------------------------------------------------------------------------------------------------------------------------------------------------------------------------------------------------------------------------------------------------------------------------------------------------------------------------------------------------------------------------------------------------------------------------------------------------------------------------------|
| Patient 4 | <ul style="list-style-type: none"> <li>• Fatigue – Grade 1</li> </ul>                                                                                                                                                                                                                                                             | <ul style="list-style-type: none"> <li>• Fatigue – Grade 2</li> <li>• Lethargy – Grade 2</li> <li>• Pain (incision site) – Grade 2</li> <li>• Insomnia – Grade 2</li> <li>• Constipation – Grade 2</li> <li>• Urinary retention – Grade 2</li> <li>• Back pain – Grade 1</li> <li>• Hyperglycemia – Grade 1</li> <li>• Cerebral edema – Grade 2</li> <li>• Left hemiplegia – Grade 3</li> <li>• Dysphasia – Grade 2 and 1</li> <li>• Dysarthria – Grade 2</li> <li>• Stroke – Grade 3</li> <li>• Anxiety – Grade 1</li> <li>• Depression – Grade 2</li> <li>• Pain (incision site) – Grade 2</li> <li>• Fatigue – Grade 2</li> <li>• Pain (bilateral knees) – Grade 2</li> <li>• Cerebral edema – Grade 2</li> <li>• Fronto-temporal fluid collection – Grade 1</li> <li>• Stroke – Grade 2</li> <li>• Seizure – Grade 2</li> </ul> |
| Patient 5 | <ul style="list-style-type: none"> <li>• Insomnia – Grade 1</li> <li>• Nausea – Grade 1</li> <li>• Constipation – Grade 1</li> <li>• Back Pain – Grade 1</li> <li>• Hypothyroidism – Grade 2</li> <li>• Restless leg syndrome</li> <li>• Headache – Grade 1</li> <li>• Migraine – Grade 1</li> <li>• Anxiety – Grade 1</li> </ul> |                                                                                                                                                                                                                                                                                                                                                                                                                                                                                                                                                                                                                                                                                                                                                                                                                                     |

| Patient   | Date of pump placement | Date of pump explant/resection | Concomitant medications                                                                                                                                                                                                                                                                                                                                                                                                                                                                                                                                                                                                                                                                                 |
|-----------|------------------------|--------------------------------|---------------------------------------------------------------------------------------------------------------------------------------------------------------------------------------------------------------------------------------------------------------------------------------------------------------------------------------------------------------------------------------------------------------------------------------------------------------------------------------------------------------------------------------------------------------------------------------------------------------------------------------------------------------------------------------------------------|
| Patient 1 | 1/22/18                | 2/22/18                        | <b>AEDs:</b><br>•Carbamazepine ER 800 mg PO BID<br>•Clobazam 20 mg PO qHS<br><b>Steroids:</b><br>•Dexamethasone 10/6/4/2 mg PO q6hr<br><b>Other:</b><br>•2%/3% hypertonic saline IV PRN<br>•Enoxaparine 40 mg SQ qD<br><b>AEDs:</b><br>•Levetiracetam 500 mg PO BID<br><b>Steroids:</b><br>•Dexamethasone 10/6/4 mg PO q6hr<br><b>AEDs:</b><br>•Levetiracetam 500 mg PO BID<br><b>Steroids:</b><br>•Dexamethasone 10/6/4/2 mg PO q6hr<br><b>AEDs:</b><br>•Levetiracetam 1500/1000 mg PO BID<br><b>Steroids:</b><br>•Dexamethasone 10/6 mg PO q6hr<br><b>Other:</b><br>•Lorazepam 1 mg IV PUSH<br><b>AEDs:</b><br>•Levetiracetam 500 mg PO BID<br><b>Steroids:</b><br>•Dexamethasone 10/6/4/2 mg PO q6hr |
|           | 9/17/18                | 10/12/18                       |                                                                                                                                                                                                                                                                                                                                                                                                                                                                                                                                                                                                                                                                                                         |
| Patient 2 | 1/24/19                | 2/20/19                        |                                                                                                                                                                                                                                                                                                                                                                                                                                                                                                                                                                                                                                                                                                         |
| Patient 3 | 2/14/19                | 3/11/19                        |                                                                                                                                                                                                                                                                                                                                                                                                                                                                                                                                                                                                                                                                                                         |
| Patient 4 | 7/8/19                 | 7/31/19                        |                                                                                                                                                                                                                                                                                                                                                                                                                                                                                                                                                                                                                                                                                                         |
| Patient 5 |                        |                                |                                                                                                                                                                                                                                                                                                                                                                                                                                                                                                                                                                                                                                                                                                         |



**Serious Adverse Events**

|           |                                                                                                          |
|-----------|----------------------------------------------------------------------------------------------------------|
| Patient 1 | Nervous System Disorders Other: Supplementary motor area (SMA) syndrome, Grade 3 DLT – 1/26/18 – 1/28/18 |
| Patient 2 | No SAEs reported during trial                                                                            |
| Patient 3 | No SAEs reported during trial                                                                            |
| Patient 4 | Stroke, Grade 3 – 3/11/19 – 3/11/19 (Intraoperative)                                                     |
| Patient 5 | Stroke, Grade 2 – 8/14/19 – 9/3/19                                                                       |

| Karnofsky Performance Scores (KPS) |                  |                                   |    |                                                                              | Comments |
|------------------------------------|------------------|-----------------------------------|----|------------------------------------------------------------------------------|----------|
| KPS Pre-Trial                      | KPS End infusion | KPS Post-Trial (4-6 wk follow-up) |    |                                                                              |          |
| Patient 1                          | 90               | 90                                | 80 | Transient decrease in KPS during Pulse 2 secondary to transient SMA syndrome |          |
| Patient 2                          | 90               | 100                               | 90 |                                                                              |          |
| Patient 3                          | 100              | 90                                | 90 |                                                                              |          |
| Patient 4                          | 90               | 90                                | 40 | Postoperative decrease in KPS secondary to intraoperative stroke             |          |
| Patient 5                          | 80               | 100                               | 80 |                                                                              |          |

| Neuro-Cognitive Assessments - Raw Scores |           |         |         |                    |                    |                    |
|------------------------------------------|-----------|---------|---------|--------------------|--------------------|--------------------|
|                                          | Pre-Study | Pulse 1 | Pulse 4 | 1-4d Post-Infusion | 1-2w Post-Infusion | 4-6w Post-Infusion |
| Patient 1                                |           | 43      |         |                    | 51                 | 37                 |
| Patient 2                                | 29        | 43      | 47      | 43                 | 48                 | 39                 |
| Patient 3                                | 44        | 40      | 43      | 20                 | 30                 |                    |
| Patient 4                                | 36        | 33      | 39      | 4                  | 16                 |                    |
| Patient 5                                | 31        | 22      | 54      | 45                 | 39                 |                    |

| Neuro-Cognitive Assessments - Adjusted Scores |           |         |         |                    |                    |                    |
|-----------------------------------------------|-----------|---------|---------|--------------------|--------------------|--------------------|
|                                               | Pre-Study | Pulse 1 | Pulse 4 | 1-4d Post-Infusion | 1-2w Post-Infusion | 4-6w Post-Infusion |
| Patient 1                                     |           | 43      |         |                    | 51                 | 37                 |
| Patient 2                                     | 30        | 44      | 48      | 44                 | 49                 | 40                 |
| Patient 3                                     | 47        | 43      | 46      | 23                 | 33                 |                    |
| Patient 4                                     | 37        | 34      | 40      | 5                  | 17                 |                    |
| Patient 5                                     | 31        | 22      | 54      | 45                 | 39                 |                    |

| Percentiles |           |         |         |                    |                    |                    |
|-------------|-----------|---------|---------|--------------------|--------------------|--------------------|
|             | Pre-Study | Pulse 1 | Pulse 4 | 1-4d Post-Infusion | 1-2w Post-Infusion | 4-6w Post-Infusion |
| Patient 1   |           | 67      |         |                    | 87                 | 43                 |
| Patient 2   | 16        | 69      |         | 69                 | 82                 | 58                 |
| Patient 3   | 78        | 43      | 76      | 4                  | 27                 |                    |
| Patient 4   | 43        | 30      | 58      | 1                  | 1                  |                    |
| Patient 5   | 19        | 3       | 92      | 72                 | 50.3               |                    |

|           | FACT-Brain QOL Scores |         |         |         |         |            |
|-----------|-----------------------|---------|---------|---------|---------|------------|
|           | Pre-Study             | Pulse 1 | Pulse 2 | Pulse 3 | Pulse 4 | Post-Study |
| Patient 1 | 96                    | 95      | 77      | 81      |         | 82         |
| Patient 2 | 102                   | 102     | 89      | 83      | 90      | 88         |
| Patient 3 | 90                    | 86      |         |         | 95      | 67         |
| Patient 4 | 93                    | 80      |         |         | 81      | 93         |
| Patient 5 | 99                    | 100.83  |         |         | 98.67   |            |

FACT-Br score range 0-200

|           | FACIT-Fatigue scale |         |         |         |         |            |
|-----------|---------------------|---------|---------|---------|---------|------------|
|           | Pre-Study           | Pulse 1 | Pulse 2 | Pulse 3 | Pulse 4 | Post-Study |
| Patient 1 | 10                  | 22      | 12      | 15      |         | 7          |
| Patient 2 | 11                  | 11      | 12      | 11      | 12      | 10         |
| Patient 3 | 7                   | 11      |         |         | 12      | 24         |
| Patient 4 | 14                  | 18      |         |         | 10      | 26         |
| Patient 5 | 17                  | 33      |         |         | 21      |            |

FACIT Fatigue scale 0-52

|           | PROMIS Global health measure (T-Score) |         |         |         |         |            |
|-----------|----------------------------------------|---------|---------|---------|---------|------------|
|           | Pre-Study                              | Pulse 1 | Pulse 2 | Pulse 3 | Pulse 4 | Post-Study |
| Patient 1 | 56                                     | 38.8    | 43.5    | 41.1    |         | 48.3       |
| Patient 2 | 62.5                                   | 56      | 53.3    | 67.6    | 56      | 48.3       |
| Patient 3 | 53.3                                   | 62.5    |         |         | 59      | 48.3       |
| Patient 4 | 45.8                                   | 45.8    |         |         | 47.7    | 45.8       |
| Patient 5 | 48.3                                   | 45.8    |         |         | 43.5    |            |

PROMIS Global health: Higher T-Score is healthier

| <b>Patient</b> | <b>Volume of distribution* (Vd)</b> | <b>Volume of infusion* (Vi)</b> | <b>Vd/Vi*</b> | <b>Total volume of infusion</b> |
|----------------|-------------------------------------|---------------------------------|---------------|---------------------------------|
| Patient 1      | 13.1 mL                             | 5.4 mL                          | 2.44          | 21.6 mL                         |
| Patient 2      | 35.9 mL                             | 11.1 mL                         | 3.23          | 38.4 mL                         |
| Patient 3      | 14.6 mL                             | 7.2 mL                          | 2.03          | 38.4 mL                         |
| Patient 4      | 26.6 mL                             | 9.7 mL                          | 2.73          | 38.4 mL                         |
| Patient 5      | 12.0 mL                             | 9.6 mL                          | 1.24          | 38.4 mL                         |

(\* = measured at the time of maximum volume of distribution)

| Gene       | baseMean    | log2FoldChange | lfcSE       | stat          | pvalue      | neg         |
|------------|-------------|----------------|-------------|---------------|-------------|-------------|
| DKI1       | 746.565727  | 5.21595832     | 0.46882098  | 11.1256928    | 9.40721E-29 | 1.73366E-24 |
| WNK4       | 535.67552   | 4.81647153     | 0.45432283  | 10.6014192    | 2.93492E-26 | 2.70438E-22 |
| NECTIN4    | 319.4882503 | 4.83799314     | 0.46246739  | 10.46126311   | 1.30190E-25 | 7.92623E-22 |
| NCEP1      | 196.111039  | 5.38292139     | 0.51604658  | 10.43108886   | 1.78842E-25 | 8.23971E-22 |
| HCAR3      | 161.9730513 | 6.10907577     | 0.62854004  | 9.71940824    | 2.49226E-22 | 9.18596E-19 |
| COL12      | 8767.073074 | 6.02987331     | 0.626056854 | 9.63151074    | 5.88577E-22 | 1.80781E-18 |
| ANKRD1     | 483.1837738 | 4.91483679     | 0.516853738 | 9.50914431    | 1.92378E-21 | 5.06106E-18 |
| RNASE7     | 91.88871869 | 6.605940165    | 0.702748969 | 9.400142097   | 5.44894E-21 | 1.25232E-17 |
| COL20      | 504.9079605 | 4.22632338     | 0.455661041 | 9.27514753    | 1.77373E-20 | 3.63202E-17 |
| IGFBP6     | 5847.525994 | 3.75880079     | 0.412494897 | 9.11235704    | 8.06112E-20 | 1.48558E-16 |
| GDF15      | 5104.918033 | 4.40737178     | 0.485027458 | 9.086007063   | 1.02743E-19 | 1.72132E-16 |
| HCA2       | 151.4654788 | 5.047967281    | 0.561376017 | 8.992132064   | 2.4248E-19  | 3.72389E-16 |
| HBA1       | 7620.9292   | 4.15282587     | 0.465487559 | 8.921454029   | 4.62026E-19 | 6.52395E-16 |
| COL11      | 477.688095  | 3.70454381     | 0.417591959 | 8.871204919   | 7.23587E-19 | 9.52488E-16 |
| C15orf48   | 697.946883  | 4.48752654     | 0.513380911 | 8.741124665   | 2.30801E-18 | 2.83562E-15 |
| HBA2       | 158638.8161 | 4.108053462    | 0.474088433 | 8.66614453    | 4.50941E-18 | 4.61688E-15 |
| MMP7       | 1129.021408 | 4.889475807    | 0.56168038  | 8.669478197   | 4.34105E-18 | 4.61688E-15 |
| TMM3F19    | 81.78149146 | 3.778182659    | 0.435578605 | 8.673993946   | 4.17421E-18 | 4.61688E-15 |
| FXYD2      | 230.7816238 | 3.536696983    | 0.409548787 | 8.635593833   | 5.84227E-18 | 5.6667E-15  |
| G0S2       | 1651.998321 | 3.601872054    | 0.42471032  | 8.480773569   | 2.23702E-17 | 2.06133E-14 |
| COL22      | 280.1877079 | 3.820516393    | 0.451396152 | 8.463777047   | 2.58854E-17 | 2.16838E-14 |
| LCE1C      | 174.1032885 | 6.693593902    | 0.790370949 | 8.46892715    | 2.47664E-17 | 2.16838E-14 |
| FKBP       | 4843.728134 | 2.892391272    | 0.348517107 | 8.297837187   | 1.06024E-16 | 8.49528E-14 |
| TP53I3     | 4414.757994 | 3.205756368    | 0.387886378 | 8.264678908   | 1.40071E-16 | 1.07557E-13 |
| CD70       | 401.1973522 | 4.760594062    | 0.57654432  | 8.25711727    | 1.49233E-16 | 1.10008E-13 |
| CEACAM6    | 96.87577459 | 5.276709389    | 0.639925758 | 8.245814963   | 1.64038E-16 | 1.16272E-13 |
| TFPI2      | 361.9941551 | 3.77695878     | 0.474002031 | 8.180789007   | 2.81991E-16 | 1.92475E-13 |
| ADP9       | 1106.654774 | 3.385118821    | 0.415629688 | 8.144795515   | 3.79923E-16 | 2.50057E-13 |
| IL12D      | 170.5833992 | 3.357901493    | 0.41523344  | 8.085780514   | 6.12625E-16 | 3.89312E-13 |
| KRT5       | 296.9766352 | -5.188275975   | 0.644339667 | -8.052128463  | 8.13644E-16 | 4.99834E-13 |
| LRG1       | 257.7482472 | 3.251579459    | 0.40978952  | 7.934755042   | 2.10911E-15 | 1.25383E-12 |
| KRT7       | 501.8556161 | 3.676853164    | 0.464137779 | 7.921900196   | 2.33908E-15 | 1.34709E-12 |
| RRAD       | 2041.088539 | 3.096039333    | 0.392976517 | 7.878433448   | 3.31511E-15 | 1.85134E-12 |
| S100AL2    | 118.0813302 | 4.107454452    | 0.524097079 | 7.837201576   | 4.60698E-15 | 2.49712E-12 |
| LADI       | 80.49092629 | 4.828589171    | 0.621886116 | 7.764426716   | 8.20153E-15 | 4.31846E-12 |
| PAM4       | 93.98103155 | 3.812085103    | 0.491495881 | 7.756090748   | 8.75874E-15 | 4.48374E-12 |
| CLDN1      | 581.8876037 | 3.650159869    | 0.470899521 | 7.751462262   | 9.80038E-15 | 4.52459E-12 |
| ACPS       | 5751.530347 | 3.618711267    | 0.471167208 | 7.680312223   | 1.58701E-14 | 7.6966E-12  |
| CD2        | 1671.340291 | 3.212661732    | 0.419950701 | 7.671523636   | 1.69965E-14 | 8.03151E-12 |
| PLIN2      | 6407.175288 | 2.175412047    | 0.283929328 | 7.661808177   | 1.83333E-14 | 8.24061E-12 |
| SFN        | 3998.409107 | 3.861643534    | 0.503808675 | 7.66490083    | 1.78969E-14 | 8.24061E-12 |
| COX8B      | 1027.762308 | 2.245575017    | 0.29373732  | 7.64484046    | 2.09205E-14 | 9.1796E-12  |
| SERTAD1    | 2222.54772  | 2.372249071    | 0.310720539 | 7.634661119   | 2.26415E-14 | 9.70373E-12 |
| COL23      | 73.12703954 | 4.486896264    | 0.590864629 | 7.592241901   | 3.14417E-14 | 1.31691E-11 |
| SLAMF7     | 744.7685661 | 3.422807078    | 0.452739432 | 7.560214193   | 4.02406E-14 | 1.64799E-11 |
| FCN1       | 404.5827848 | 3.48240168     | 0.461573139 | 7.544636776   | 4.5355E-14  | 1.81706E-11 |
| S100P      | 67.53523437 | 3.45316154     | 0.463904753 | 7.443686482   | 9.79137E-14 | 3.83926E-11 |
| LILRB5     | 1212.944492 | 2.812546865    | 0.37866254  | 7.427581478   | 1.10601E-13 | 4.2464E-11  |
| CXCR1      | 84.74482919 | 3.648812592    | 0.491589615 | 7.422476961   | 1.1495E-13  | 4.32329E-11 |
| RHO D      | 507.7557865 | 2.851258858    | 0.386112772 | 7.384523552   | 1.53E-13    | 5.63928E-11 |
| LCE1E      | 64.34531981 | 5.416405249    | 0.734670982 | 7.37255912    | 1.67383E-13 | 6.04845E-11 |
| DOK2       | 482.3134046 | 2.850600599    | 0.393047892 | 7.25253072    | 4.09888E-13 | 1.44947E-10 |
| GFP        | 575.5028852 | 2.380592694    | 0.3301115   | 7.211480642   | 5.53467E-13 | 1.85452E-10 |
| PMW1       | 491.4491538 | 2.928507964    | 0.405959961 | 7.213856298   | 5.43892E-13 | 1.85452E-10 |
| COL3       | 264.0469779 | 2.981474391    | 0.413760548 | 7.214514923   | 5.41266E-13 | 1.85452E-10 |
| MFAP5      | 381.3972013 | 2.71532300     | 0.385688567 | 7.19371285    | 6.30527E-13 | 2.075E-10   |
| EVHA1A     | 714.242522  | 3.063898782    | 0.426401933 | 7.18547113    | 6.69758E-13 | 2.16543E-10 |
| NFKBIE     | 1579.258667 | 1.897801447    | 0.264915706 | 7.16379633    | 7.84745E-13 | 2.4512E-10  |
| DHX1       | 133.5822254 | 1.974255793    | 0.27552291  | 7.164722842   | 7.79441E-13 | 2.4512E-10  |
| C22orf68   | 41.70516783 | 2.662145178    | 0.372334317 | 7.149878541   | 6.88547E-13 | 2.66774E-10 |
| SPIN1      | 434.7616238 | 1.995874243    | 0.279774214 | 7.13387491    | 9.7582E-13  | 2.9481E-10  |
| SELE       | 171.925079  | 3.729278624    | 0.523109971 | 7.129052845   | 1.01062E-12 | 3.00398E-10 |
| COMTD1     | 810.7768498 | 1.915590164    | 0.269196922 | 7.115943793   | 1.1115E-12  | 3.25139E-10 |
| LILRB4     | 280.9979821 | 3.07306272     | 0.433426392 | 7.090160577   | 1.33956E-12 | 3.85732E-10 |
| APOB       | 1801.254154 | 2.189328214    | 0.309127158 | 7.082290105   | 1.41791E-12 | 4.02011E-10 |
| CLEC4E     | 746.5147551 | 2.988833334    | 0.422797951 | 7.069181214   | 1.55851E-12 | 4.35177E-10 |
| TNFRSF10C  | 633.3626132 | 2.601458365    | 0.368158032 | 7.066145896   | 1.52966E-12 | 4.38159E-10 |
| FAM83G     | 497.6251949 | 2.618548024    | 0.371742595 | 7.043976782   | 1.86829E-12 | 4.98997E-10 |
| MMP8       | 84.3665837  | 3.309007812    | 0.469737775 | 7.044447379   | 1.86199E-12 | 4.98997E-10 |
| SERINC2    | 1019.30468  | 2.28158090     | 0.324710542 | 7.029365209   | 2.07475E-12 | 5.46223E-10 |
| TIMP1      | 72367.79362 | 2.92062444     | 0.417490905 | 6.996469555   | 2.62493E-12 | 6.81335E-10 |
| IL1ML1     | 182.910188  | 2.429698667    | 0.34746792  | 6.992584145   | 2.69869E-12 | 6.90751E-10 |
| ALAS2      | 138.5786913 | 3.428464922    | 0.493465586 | 6.947728508   | 3.71214E-12 | 9.37139E-10 |
| SLC22A1    | 296.0374861 | 3.217823705    | 0.464791788 | 6.923150942   | 4.41707E-12 | 1.10003E-09 |
| B3GNT8     | 197.8743357 | 2.509942592    | 0.3646359   | 6.883421495   | 5.84318E-12 | 1.43579E-09 |
| CDKN1A     | 14642.6047  | 2.200873737    | 0.320455136 | 6.867962121   | 6.51255E-12 | 1.57921E-09 |
| KCNK15     | 127.2803018 | 3.027047969    | 0.44590052  | 6.793347287   | 1.09561E-11 | 2.62221E-09 |
| EEF1MKM4   | 140.1020534 | 2.134507223    | 0.316175019 | 6.751030592   | 1.46799E-11 | 3.4684E-09  |
| GPI3       | 1304.7993   | 2.524616254    | 0.375537385 | 6.722024694   | 1.79217E-11 | 4.18074E-09 |
| FDSL1      | 857.2842845 | 2.369291903    | 0.353101838 | 6.709939314   | 1.94705E-11 | 4.48528E-09 |
| HST1H2B    | 111.7100214 | 2.486521518    | 0.371480615 | 6.693543126   | 2.17831E-11 | 4.95605E-09 |
| SIRPB      | 698.4685452 | 2.187012318    | 0.327454513 | 6.678827835   | 2.40861E-11 | 5.4132E-09  |
| SESN2      | 1909.792321 | 1.448703164    | 0.217380961 | 6.664363906   | 2.65814E-11 | 5.90203E-09 |
| IFI30      | 2175.693    | 2.19021016     | 0.378131768 | 6.656401145   | 2.8061E-11  | 6.08395E-09 |
| CSF3       | 85.1568828  | 3.28009697     | 0.492687252 | 6.657564174   | 2.78401E-11 | 6.08395E-09 |
| CD30E      | 257.7681783 | 2.769991195    | 0.415922949 | 6.650249653   | 2.92597E-11 | 6.27009E-09 |
| IL1RN      | 721.104675  | 2.91236265     | 0.439063414 | 6.633125128   | 3.28653E-11 | 6.96177E-09 |
| LAMC2      | 138.8642344 | 2.52389576     | 0.381059647 | 6.623357924   | 3.51129E-11 | 7.27075E-09 |
| MPO1G      | 1417.944788 | 2.401910104    | 0.362556005 | 6.624926736   | 3.47422E-11 | 7.27075E-09 |
| S100A3     | 581.9461272 | 2.478219222    | 0.377636466 | 6.562446804   | 5.29319E-11 | 1.08387E-08 |
| STAP2      | 397.3148807 | 2.070929588    | 0.315916304 | 6.555310899   | 5.5261E-11  | 1.11227E-08 |
| COLR2      | 825.3985318 | 2.289840457    | 0.349251556 | 6.556421639   | 5.51143E-11 | 1.11227E-08 |
| CCR7       | 220.5990017 | 3.032105575    | 0.463697855 | 6.538968299   | 6.19447E-11 | 1.2275E-08  |
| TNFRSF9    | 557.1241927 | 2.270112451    | 0.347442195 | 6.533784572   | 6.41282E-11 | 1.25725E-08 |
| BBC3       | 1091.513018 | 1.780087931    | 0.273752683 | 6.502540581   | 7.89747E-11 | 1.53203E-08 |
| CAMP       | 60.1966797  | 3.388583398    | 0.592486617 | 6.479232254   | 9.21905E-11 | 1.76977E-08 |
| LILRB3     | 66.90358898 | 3.40399398     | 0.527379852 | 6.454539068   | 1.08549E-10 | 2.06231E-08 |
| S100B      | 38182.4926  | 1.730897328    | 0.2020196   | 6.405067693   | 1.49321E-10 | 2.80799E-08 |
| NFKB2      | 2347.577252 | 1.805492131    | 0.282144437 | 6.399176775   | 1.56217E-10 | 2.808E-08   |
| CLDN4      | 149.342183  | 2.562975247    | 0.400782477 | 6.394928405   | 1.60623E-10 | 2.96011E-08 |
| CYSRT1     | 160.6288473 | 1.948397378    | 0.305258158 | 6.382785611   | 1.73895E-10 | 3.17299E-08 |
| SPR        | 945.5792078 | 1.137258875    | 0.178728464 | 6.363054076   | 1.97781E-10 | 3.53874E-08 |
| BN1        | 58.09154065 | 2.634767824    | 0.414013818 | 6.363991086   | 1.96616E-10 | 3.53874E-08 |
| AL049629.2 | 211.303462  | 2.729247768    | 0.429450586 | 6.355207923   | 2.08145E-10 | 3.68837E-08 |
| LILRB6     | 589.592039  | 2.3084299      | 0.363885334 | 6.343835343   | 2.24144E-10 | 3.93353E-08 |
| PGLRP1     | 20.29927718 | 4.333099175    | 0.687604045 | 6.302652625   | 2.92594E-10 | 5.087E-08   |
| DOX1       | 61.55534497 | 2.761163583    | 0.438229465 | 6.30072554    | 2.96256E-10 | 5.10252E-08 |
| HST1H1C    | 1586.085693 | 1.759937513    | 0.279746918 | 6.291177486   | 3.15067E-10 | 5.37627E-08 |
| HES2       | 75.07745966 | 2.50993224     | 0.400204638 | 6.27177445    | 3.59956E-10 | 6.03158E-08 |
| HK1        | 224.8789164 | 2.253416578    | 0.360974233 | 6.242596764   | 4.30365E-10 | 7.21018E-08 |
| TNFRSF10A  | 272.278472  | 2.05766301     | 0.330112388 | 6.227558303   | 4.7376E-10  | 7.8657E-08  |
| SUCRA1     | 121.136652  | 2.84949605     | 0.456953882 | 6.226116433   | 4.78139E-10 | 7.86752E-08 |
| COL2A1     | 1134.591477 | 2.438116582    | 0.392846153 | 6.206288547   | 5.42505E-10 | 8.44764E-08 |
| ACTL10     | 110.3745627 | 1.691770588    | 0.273529784 | 6.184999129</ |             |             |

|           |             |              |             |              |             |             |
|-----------|-------------|--------------|-------------|--------------|-------------|-------------|
| FGR       | 1745.699300 | 1.810715477  | 0.293904523 | 6.160896044  | 7.233415-10 | 1.149188-07 |
| FRSS57    | 12.33719163 | 4.311099660  | 0.700741723 | 6.152189214  | 7.642066-10 | 1.203726-07 |
| HTRM      | 898.1972933 | 2.030387773  | 0.331639735 | 6.122269124  | 9.225196-10 | 1.440776-07 |
| SERPIN B2 | 47.45103551 | 2.945382112  | 0.481884189 | 6.112219963  | 9.825466-10 | 1.521636-07 |
| AREG      | 201.8126181 | 3.464782725  | 0.567120595 | 6.109427735  | 9.998986-10 | 1.522896-07 |
| MWP2K3    | 2158.23506  | 1.286550751  | 0.210566321 | 6.109955029  | 9.969924-10 | 1.522896-07 |
| CL10B6    | 2670.338241 | 1.636625351  | 0.267966634 | 6.107571398  | 1.011596-09 | 1.528076-07 |
| KRT18     | 130.6604169 | 2.232846804  | 0.365841557 | 6.103316487  | 1.03896-09  | 1.556576-07 |
| COXR2     | 208.9247896 | 2.166860115  | 0.355394823 | 6.097050309  | 1.080446-09 | 1.605756-07 |
| CE51      | 873.3879635 | 2.689249309  | 0.442459626 | 6.077954122  | 1.212766-09 | 1.780386-07 |
| NEUPL3    | 174.4934217 | 2.056859994  | 0.338403728 | 6.078124513  | 1.215966-09 | 1.780386-07 |
| S100A2    | 278.7278143 | 2.149836905  | 0.3540272   | 6.072519019  | 1.259196-09 | 1.812946-07 |
| HROX1     | 392.9498299 | 1.803023628  | 0.296893113 | 6.072971875  | 1.255646-09 | 1.812946-07 |
| BAET14    | 27.7520246  | 4.29516778   | 0.707802055 | 6.070219961  | 1.277356-09 | 1.824836-07 |
| SEPH2     | 3172.38900  | 0.869032443  | 0.143767678 | 6.04469998   | 1.496886-09 | 2.122016-07 |
| IL41      | 991.8755029 | 2.294281521  | 0.379802318 | 6.040725435  | 1.534236-09 | 2.158446-07 |
| ITLN1     | 15.67496327 | 0.404013911  | 0.671722692 | 6.020362212  | 1.740276-09 | 2.429666-07 |
| S1PR4     | 162.2441547 | 2.401006345  | 0.399125268 | 6.015671098  | 1.791436-09 | 2.482286-07 |
| HBB       | 86007.81669 | 2.837293424  | 0.471992427 | 6.011311327  | 1.840296-09 | 2.530946-07 |
| PROCR     | 945.2700803 | 1.900758682  | 0.316362539 | 6.008114833  | 1.876936-09 | 2.562226-07 |
| CITED1    | 1275.805933 | 2.201022708  | 0.370240053 | 5.944865198  | 2.766846-09 | 3.749286-07 |
| OSCAR     | 1316.567763 | 1.800583322  | 0.302946072 | 5.943583666  | 2.788576-09 | 3.751146-07 |
| LLLR83    | 990.286809  | 2.357317175  | 0.3968214   | 5.940499926  | 2.841544-09 | 3.794696-07 |
| DGAT2     | 549.2116488 | 1.82619135   | 0.307850121 | 5.93207936   | 2.991226-09 | 3.965846-07 |
| NPB       | 770.3105979 | 1.830751878  | 0.30873303  | 5.929886659  | 3.031444-09 | 3.990466-07 |
| IL23A     | 125.9456127 | 2.59484402   | 0.437830101 | 5.926600325  | 3.09276-09  | 4.013766-07 |
| DEFA1     | 23.05570688 | 4.411166217  | 0.744223903 | 5.927203093  | 3.081386-09 | 4.013766-07 |
| TNPSF9    | 429.861207  | 1.793758006  | 0.302680795 | 5.924585423  | 3.130866-09 | 4.034876-07 |
| ETM       | 452.0022939 | 1.58743217   | 0.268088323 | 5.921745743  | 3.18546-09  | 4.076556-07 |
| GLL14     | 39.79816022 | 2.356599252  | 0.399557208 | 5.8981765    | 3.675416-09 | 4.671326-07 |
| CEACM1    | 212.8878653 | 2.331565401  | 0.395444949 | 5.896055586  | 3.722946-09 | 4.699316-07 |
| COCL5     | 347.981597  | 2.342768278  | 0.398867832 | 5.873545296  | 4.265726-09 | 5.347836-07 |
| GLALR2    | 25.28504    | 2.840828674  | 0.484647378 | 5.861640453  | 4.583176-09 | 5.706976-07 |
| RHCG      | 226.9021383 | 2.081509707  | 0.35544724  | 5.856030024  | 4.740636-09 | 5.863426-07 |
| PTGES     | 308.9790242 | 1.868871872  | 0.319586585 | 5.847779484  | 4.981786-09 | 6.120626-07 |
| SRGAP2    | 3525.122073 | -0.693825748 | 0.118839738 | -5.838331157 | 5.272636-09 | 6.435056-07 |
| RETN      | 32.73890384 | 2.949244262  | 0.50689156  | 5.829795348  | 5.549546-09 | 6.728456-07 |
| PALD1     | 2828.95151  | -0.980759865 | 0.168280573 | -5.828122922 | 5.605436-09 | 6.751796-07 |
| CHMP4C    | 95.04227951 | 2.100421928  | 0.361473159 | 5.810727221  | 6.22026-09  | 7.443656-07 |
| ABC35     | 41.70399583 | 2.242436135  | 0.386288662 | 5.805078835  | 6.433576-09 | 7.600286-07 |
| NR1H9     | 1249.653811 | 1.246976853  | 0.214790034 | 5.805096046  | 6.43296-09  | 7.600286-07 |
| TA7T1     | 93.34500309 | 2.543404909  | 0.438474197 | 5.800580579  | 6.608576-09 | 7.757286-07 |
| RFXK1P1   | 446.0581827 | 2.291081189  | 0.395193467 | 5.797366051  | 6.736456-09 | 7.857356-07 |
| EPH4      | 275.6182392 | 1.864330007  | 0.321700993 | 5.795006049  | 6.828846-09 | 7.915016-07 |
| TRAF1     | 1599.09702  | 1.354792328  | 0.234055955 | 5.788326722  | 7.10916-09  | 8.188356-07 |
| MMGT1     | 1828.937653 | 0.346466976  | 0.059944612 | 5.779785121  | 7.479616-09 | 8.561666-07 |
| KRT23     | 44.13058411 | 3.014403183  | 0.521953604 | 5.775232055  | 7.684716-09 | 8.742076-07 |
| TMEM150B  | 155.7683648 | 2.095014381  | 0.363601771 | 5.761837662  | 8.32036-09  | 9.407046-07 |
| Clorf68   | 17.5974416  | 7.404284899  | 1.286754607 | 5.754232283  | 8.703646-09 | 9.721186-07 |
| S100A8    | 2696.46868  | 2.495932051  | 0.433734708 | 5.754513087  | 8.689196-09 | 9.721186-07 |
| LYPLA2    | 2896.789662 | 1.144863568  | 0.199458153 | 5.739868495  | 9.475016-09 | 1.05196-06  |
| RETREG3   | 2339.765227 | 0.601268245  | 0.10490994  | 5.731280013  | 9.967566-09 | 1.099956-06 |
| ADAMDEC1  | 348.7531828 | 2.561597772  | 0.448603897 | 5.710154974  | 1.128736-08 | 1.238186-06 |
| LSP1      | 3713.434998 | 1.900709669  | 0.333074977 | 5.706551976  | 1.152886-08 | 1.257186-06 |
| AP5B1     | 952.7154269 | 1.088010307  | 0.190820466 | 5.701749119  | 1.185846-08 | 1.270586-06 |
| NWE       | 114.7661203 | 2.173821179  | 0.381234093 | 5.702064571  | 1.183656-08 | 1.270586-06 |
| TMSB10    | 65205.27139 | 1.290752709  | 0.226303513 | 5.703634711  | 1.172796-08 | 1.270586-06 |
| S100B     | 6838.123029 | 2.328913015  | 0.408862295 | 5.696081789  | 1.225926-08 | 1.305926-06 |
| RGN15     | 132.7040673 | 1.486899762  | 0.261240672 | 5.691570738  | 1.258766-08 | 1.325586-06 |
| ST14      | 1967.854357 | 1.883857808  | 0.33094532  | 5.692353688  | 1.25316-08  | 1.325586-06 |
| ICAM3     | 545.6273448 | 1.484520782  | 0.260923436 | 5.689488809  | 1.274216-08 | 1.334236-06 |
| GNPDA1    | 3549.909808 | 0.881702432  | 0.155033259 | 5.687182463  | 1.291256-08 | 1.344726-06 |
| SLR       | 1882.061538 | 1.446236503  | 0.254448444 | 5.683899797  | 1.316656-08 | 1.363186-06 |
| NEU1      | 2988.218284 | 1.000189842  | 0.176045634 | 5.681423722  | 1.335786-08 | 1.375266-06 |
| LCE1B     | 11.43038794 | 5.890092372  | 1.038899923 | 5.669547416  | 1.431756-08 | 1.465886-06 |
| S1CA1     | 116.4657114 | 2.112037807  | 0.372833706 | 5.664825296  | 1.471746-08 | 1.490266-06 |
| CD44      | 114.354481  | 2.213705997  | 0.390746675 | 5.66532267   | 1.467486-08 | 1.490266-06 |
| CTSL      | 14591.88991 | 1.476902903  | 0.260826666 | 5.662391906  | 1.492776-08 | 1.50336-06  |
| TNIP2     | 1896.640523 | 1.173891211  | 0.207423503 | 5.659393436  | 1.519096-08 | 1.521486-06 |
| PHF23     | 1793.856639 | 0.6143534    | 0.108588617 | 5.657622476  | 1.534846-08 | 1.528956-06 |
| LIF       | 1000.880979 | 2.211449234  | 0.393172916 | 5.650056036  | 1.603966-08 | 1.589216-06 |
| PTGIR     | 267.7698844 | 1.685291065  | 0.298522727 | 5.645436381  | 1.647836-08 | 1.623756-06 |
| TSKU      | 931.8435564 | 1.25864443   | 0.217542428 | 5.635059085  | 1.749986-08 | 1.706376-06 |
| TGN2      | 2905.428188 | 1.251928438  | 0.222160434 | 5.635244821  | 1.748116-08 | 1.706376-06 |
| PBDC1     | 1117.850212 | 1.069863638  | 0.189925688 | 5.633059102  | 1.770416-08 | 1.717126-06 |
| MKGPRX3   | 37.2330813  | 2.249106959  | 0.399362388 | 5.631744568  | 1.783966-08 | 1.721296-06 |
| TSLP      | 137.7663863 | 2.07927633   | 0.369962827 | 5.621990867  | 1.887696-08 | 1.774916-06 |
| AP0BEC3C  | 2669.617614 | 1.645644499  | 0.292690619 | 5.622532962  | 1.881716-08 | 1.774916-06 |
| NKG1      | 239.3599679 | 1.491982782  | 0.265351238 | 5.622671266  | 1.880276-08 | 1.774916-06 |
| BATF      | 373.5098597 | 2.174082583  | 0.386596363 | 5.623649865  | 1.869646-08 | 1.774916-06 |
| FSTL3     | 3883.951876 | 1.507025814  | 0.267934647 | 5.624602227  | 1.859366-08 | 1.774916-06 |
| CST4      | 24.95587112 | 6.617505808  | 1.179362982 | 5.611084891  | 2.010626-08 | 1.88096-06  |
| S1LC2A19  | 1034.049417 | 1.160450299  | 0.20751959  | 5.592003627  | 2.246466-08 | 2.089226-06 |
| CEBPZ05   | 2096.616151 | 0.43603017   | 0.078080957 | 5.584314347  | 2.345976-08 | 2.172566-06 |
| TMSB92    | 26.13137947 | 2.153454713  | 0.386031476 | 5.578429009  | 2.42716-08  | 2.225246-06 |
| GLI26     | 53.19473979 | 2.650088225  | 0.475009575 | 5.578833466  | 2.421096-08 | 2.225246-06 |
| HEP2      | 1852.752268 | 0.806288401  | 0.144572726 | 5.576886878  | 2.448876-08 | 2.234176-06 |
| FUC1      | 4418.858917 | 1.658114753  | 0.297604698 | 5.572206234  | 2.515336-08 | 2.28356-06  |
| SMM4      | 856.2900566 | 1.152886954  | 0.207007969 | 5.569287784  | 2.557836-08 | 2.31076-06  |
| GRN       | 28243.70039 | 1.537928426  | 0.276625853 | 5.559597592  | 2.703976-08 | 2.430816-06 |
| FMNL3     | 3089.737029 | -0.620590638 | 0.111705012 | -5.55620332  | 2.766286-08 | 2.474746-06 |
| MAPK13    | 1102.571589 | 1.331091754  | 0.239675928 | 5.553714812  | 2.796626-08 | 2.477836-06 |
| LEP       | 25.38932301 | 2.618802652  | 0.471503587 | 5.554152135  | 2.789626-08 | 2.477836-06 |
| N5C       | 298.3505176 | 2.172855442  | 0.391550977 | 5.548844393  | 2.875646-08 | 2.535656-06 |
| NPM3      | 170.0584017 | 0.918804924  | 0.165636059 | 5.547311027  | 2.909956-08 | 2.548426-06 |
| EPHA2     | 867.2905854 | 1.639906623  | 0.296076669 | 5.538790436  | 3.045686-08 | 2.660136-06 |
| POU1F1    | 944.1748449 | 1.769020242  | 0.318149708 | 5.534822121  | 3.115446-08 | 2.708236-06 |
| SPK1      | 1750.448719 | 1.560026294  | 0.287148259 | 5.529101369  | 3.218756-08 | 2.78496-06  |
| TNIP3     | 69.44186309 | 1.805431098  | 0.327047789 | 5.520389311  | 3.382496-08 | 2.91296-06  |
| NMP3      | 37.07405552 | 2.804710537  | 0.509220609 | 5.506768409  | 3.654816-08 | 3.118266-06 |
| DEP1      | 14.26752688 | 4.24484913   | 0.75252822  | 5.507446795  | 3.640756-08 | 3.118266-06 |
| PF4       | 38.37988134 | 2.747449071  | 0.499680997 | 5.498406107  | 3.83246-08  | 3.239786-06 |
| PLAZG7    | 861.8866612 | 1.808222913  | 0.328847365 | 5.498669315  | 3.826686-08 | 3.239786-06 |
| PLI1M4    | 3079.744039 | 1.279850519  | 0.233162322 | 5.489096654  | 4.039956-08 | 3.399646-06 |
| PER3      | 1738.910214 | -1.064933557 | 0.194145457 | -5.485245879 | 4.128956-08 | 3.458746-06 |
| TNFRSF6B  | 1210.139796 | 1.718523902  | 0.313670843 | 5.47874927   | 4.283436-08 | 3.571916-06 |
| SIGLEC15  | 65.20401924 | 2.095368914  | 0.382555688 | 5.477291222  | 4.318866-08 | 3.585246-06 |
| EFNB1     | 1814.793352 | 1.218820704  | 0.222626757 | 5.474727097  | 4.381866-08 | 3.621236-06 |
| JANX8     | 75.58214328 | 2.007578341  | 0.366968232 | 5.470714262  | 4.482256-08 | 3.671276-06 |
| SHC1      | 6042.289699 | 1.400474917  | 0.255963406 | 5.471387251  | 4.465266-08 | 3.671276-06 |
| PPP1R15A  | 5334.603528 | 1.28710023   | 0.224573771 | 5.468874941  | 4.529016-08 | 3.693156-06 |
| KRT6B     | 13.95270233 | 3.759058522  | 0.689021737 | 5.45564578   | 4.879526-08 | 3.951446-06 |
| ATG101    | 1852.530751 | 0.87043051   | 0.16995063  | 5.454778513  | 4.903396-08 | 3.963366-06 |
| AGPAT2    | 1258.091369 | 1.170423144  | 0.214852339 | 5.447569747  |             |             |



|            |             |              |             |              |             |             |
|------------|-------------|--------------|-------------|--------------|-------------|-------------|
| PLA2G2D    | 54.84895427 | 2.480547761  | 0.45610437  | 5.438512933  | 5.37151E-08 | 4.26687E-08 |
| WPS18      | 3023.928732 | 0.833522258  | 0.153298934 | 5.43723454   | 5.41139E-08 | 4.28011E-08 |
| AN         | 1966.389437 | 1.208493131  | 0.222354398 | 5.434987242  | 5.48004E-08 | 4.29751E-08 |
| U1P1       | 3042.662752 | 1.166111591  | 0.214528242 | 5.435701981  | 5.45811E-08 | 4.29751E-08 |
| HP56       | 859.7440363 | 0.856885794  | 0.157970247 | 5.424439786  | 5.81666E-08 | 4.54213E-08 |
| ADAMB      | 1297.419267 | 1.73856675   | 0.321967336 | 5.399823379  | 6.67065E-08 | 5.18707E-08 |
| NKX        | 9717.890699 | 1.6560212    | 0.306935429 | 5.395340664  | 6.83937E-08 | 5.29591E-08 |
| SPATAZL    | 780.887814  | 0.95164788   | 0.176444078 | 5.393481601  | 6.91054E-08 | 5.32863E-08 |
| BAX        | 4797.750065 | 1.258299445  | 0.233695466 | 5.384355407  | 7.27047E-08 | 5.58281E-08 |
| FR2        | 200.3542912 | 2.50361304   | 0.466736004 | 5.364620009  | 8.11198E-08 | 6.20314E-08 |
| MYO15B     | 4526.086965 | -0.763247739 | 0.14235182  | -5.361699912 | 8.24424E-08 | 6.25239E-08 |
| WMP5       | 3614.836939 | 1.476519822  | 0.275364539 | 5.36205507   | 8.22804E-08 | 6.25239E-08 |
| NOP16      | 877.3877601 | 1.093851321  | 0.204154327 | 5.357962942  | 8.41655E-08 | 6.35691E-08 |
| GF11       | 29.86152294 | -1.564569911 | 0.292394007 | -5.350896021 | 8.75198E-08 | 6.55651E-08 |
| TIRAO2     | 1009.092801 | 0.702739915  | 0.131120988 | 5.351268965  | 8.73396E-08 | 6.5561E-08  |
| HST2H4B    | 476.6091528 | 1.109826973  | 0.207647918 | 5.344752212  | 9.05408E-08 | 6.75537E-08 |
| RK10       | 76.115253   | 1.620396188  | 0.303861371 | 5.341471672  | 9.2195E-08  | 6.85106E-08 |
| SYTL1      | 441.7533113 | 1.938892623  | 0.363237116 | 5.340568297  | 9.26557E-08 | 6.85764E-08 |
| RRAGD      | 2774.71421  | 0.489321946  | 0.091675897 | 5.337520123  | 9.42264E-08 | 6.946E-08   |
| IFITM2     | 5901.852427 | 1.414787945  | 0.265110541 | 5.336596334  | 9.47076E-08 | 6.95365E-08 |
| ETV7       | 354.8404993 | 1.999834688  | 0.374964004 | 5.333404446  | 9.63881E-08 | 7.02111E-08 |
| PNP        | 2293.346074 | 1.27713278   | 0.239451845 | 5.33358341   | 9.63013E-08 | 7.02111E-08 |
| TNN        | 6986.246274 | 1.00796215   | 0.1892612   | 5.325772804  | 1.00525E-07 | 7.29358E-08 |
| CLCN1      | 20.70756121 | 2.142831755  | 0.403123468 | 5.315571837  | 1.06323E-07 | 7.68402E-08 |
| HEXIM1     | 2998.377292 | 0.773720267  | 0.145836709 | 5.305387594  | 1.12434E-07 | 8.09392E-08 |
| WMP25      | 324.2184162 | 2.20289707   | 0.41537361  | 5.303393505  | 1.1367E-07  | 8.15103E-08 |
| NOP10      | 3475.077974 | 0.981005757  | 0.185159796 | 5.298157476  | 1.16977E-07 | 8.3557E-08  |
| TMEM11A    | 1016.63841  | 0.40979862   | 0.077588494 | 5.297365885  | 1.17465E-07 | 8.35818E-08 |
| FBSDCL     | 288.5252908 | 1.907973901  | 0.36045101  | 5.293286039  | 1.20131E-07 | 8.51499E-08 |
| AP151      | 4208.508132 | 0.87782673   | 0.165868569 | 5.292303038  | 1.20786E-07 | 8.52857E-08 |
| EXO5C4     | 1625.03767  | 1.158688615  | 0.219107378 | 5.28822274   | 1.23511E-07 | 8.65466E-08 |
| ADGRE3     | 2772715108  | 3.001565208  | 0.567859484 | 5.288547359  | 1.23292E-07 | 8.65466E-08 |
| FAM647B    | 156.4222381 | 1.677757625  | 0.317979699 | 5.276304217  | 1.31815E-07 | 9.2016E-08  |
| PTGER2     | 78.39246997 | 2.20903574   | 0.419470524 | 5.266247842  | 1.32942E-07 | 9.68324E-08 |
| ADC1       | 2844.01443  | 0.338932349  | 0.075917344 | 5.254791271  | 1.48192E-07 | 1.02671E-08 |
| ELL3       | 140.4280813 | 1.412843271  | 0.268963799 | 5.252953653  | 1.49679E-07 | 1.03312E-08 |
| TREM1      | 780.9232343 | 2.479601468  | 0.472636505 | 5.246318134  | 1.55169E-07 | 1.06702E-08 |
| ADRP       | 190.3074501 | 1.956891069  | 0.373061174 | 5.245496468  | 1.55862E-07 | 1.0678E-08  |
| CST8       | 9431.424861 | 1.034625245  | 0.197704284 | 5.23319588   | 1.66604E-07 | 1.13716E-08 |
| FURIN      | 4033.181479 | 0.876384383  | 0.167647461 | 5.22754342   | 1.71777E-07 | 1.15536E-08 |
| GPR87      | 25.11433397 | 4.388707898  | 0.839478119 | 5.227900286  | 1.71446E-07 | 1.15536E-08 |
| BST1       | 371.0602838 | 1.186343547  | 0.226919402 | 5.22803927   | 1.71317E-07 | 1.15536E-08 |
| MEP1       | 29697.67107 | 1.340761631  | 0.254412359 | 5.228297423  | 1.71078E-07 | 1.15536E-08 |
| ORAI1      | 1045.0932   | 1.135391842  | 0.217729095 | 5.214700620  | 1.84114E-07 | 1.22936E-08 |
| RM47       | 661.5519624 | 1.574023252  | 0.301841912 | 5.214788995  | 1.84057E-07 | 1.22936E-08 |
| SLC35E4    | 541.2193012 | 0.758211373  | 0.14548153  | 5.211748693  | 1.87069E-07 | 1.24458E-08 |
| MS4GE      | 36.73321986 | 2.718720052  | 0.5225687   | 5.202608772  | 1.9651E-07  | 1.30269E-08 |
| ZNF189     | 1958.570392 | -0.698371054 | 0.134312811 | -5.199586327 | 1.99733E-07 | 1.31859E-08 |
| FABP4      | 110.1638599 | 1.686669481  | 0.324420489 | 5.199022687  | 2.00339E-07 | 1.31859E-08 |
| ZNF593     | 1344.473794 | 1.195997868  | 0.230121214 | 5.197240399  | 2.02269E-07 | 1.32655E-08 |
| SRA1       | 3579.77238  | 0.989339372  | 0.190410762 | 5.195816452  | 2.03823E-07 | 1.33201E-08 |
| DRAM1      | 1183.448979 | 1.416553625  | 0.273005502 | 5.18873655   | 2.11726E-07 | 1.37876E-08 |
| SAC3D1     | 1214.476116 | 1.263209374  | 0.243753828 | 5.182316056  | 2.19147E-07 | 1.42207E-08 |
| NR1P2      | 59.60296424 | 1.54551216   | 0.298186003 | 5.179859421  | 2.22053E-07 | 1.42586E-08 |
| P2RY2      | 194.4035576 | 1.5655448    | 0.302208554 | 5.18037912   | 2.21435E-07 | 1.42586E-08 |
| NME1       | 4787.477291 | 0.973986553  | 0.187971176 | 5.181040769  | 2.20652E-07 | 1.42586E-08 |
| ORAI3      | 1534.632053 | 0.920387532  | 0.177712144 | 5.179091021  | 2.22969E-07 | 1.42677E-08 |
| SGAND1     | 5080.172127 | 1.193297652  | 0.230700607 | 5.172484627  | 2.30989E-07 | 1.47298E-08 |
| INTS5      | 912.5718638 | 0.71842425   | 0.138584074 | 5.169548943  | 2.3466E-07  | 1.49122E-08 |
| ZNF222     | 2009.405313 | 0.783124544  | 0.151551227 | 5.167390164  | 2.37385E-07 | 1.49821E-08 |
| CHMP7      | 2248.76411  | 0.525241105  | 0.101638841 | 5.167720334  | 2.36967E-07 | 1.49821E-08 |
| REL1       | 1342.60651  | 1.389881151  | 0.269418048 | 5.158827198  | 2.48502E-07 | 1.56302E-08 |
| MT2A       | 25365.03894 | 1.209124272  | 0.234490083 | 5.156398229  | 2.51745E-07 | 1.57268E-08 |
| TPRA1      | 2116.814803 | 0.792947801  | 0.153773441 | 5.156597877  | 2.51477E-07 | 1.57268E-08 |
| FKBP1A     | 10410.9148  | 0.64591364   | 0.125447472 | 5.148877311  | 2.6205E-07  | 1.63153E-08 |
| AL160269.1 | 826.6116948 | -1.088384527 | 0.211451401 | -5.147208874 | 2.64391E-07 | 1.64056E-08 |
| E1F6       | 4751.164186 | 0.96539504   | 0.187638691 | 5.14495788   | 2.67567E-07 | 1.65469E-08 |
| P4L0B3     | 538.776384  | 1.076199074  | 0.209838386 | 5.128704494  | 2.91743E-07 | 1.79218E-08 |
| SLC35F6    | 3078.802083 | 0.886079155  | 0.13375956  | 5.129397145  | 2.9088E-07  | 1.79218E-08 |
| TNFRSF10D  | 492.6844271 | 1.402081422  | 0.273533092 | 5.125820334  | 2.96245E-07 | 1.81379E-08 |
| TNFRSF14   | 4298.692781 | 1.173501208  | 0.229011091 | 5.124211254  | 2.98786E-07 | 1.82329E-08 |
| DNR3       | 532.4102438 | 1.446876113  | 0.282551299 | 5.120755599  | 3.04314E-07 | 1.85089E-08 |
| CL10R6     | 15.79628453 | 2.828995193  | 0.552824985 | 5.117343227  | 3.09869E-07 | 1.87848E-08 |
| PVR        | 1535.324962 | 1.020775508  | 0.199568144 | 5.114922102  | 3.1387E-07  | 1.8965E-08  |
| FAM83H     | 881.6131003 | 1.053397064  | 0.205977088 | 5.114146836  | 3.15162E-07 | 1.89808E-08 |
| PLAC8      | 167.5995969 | 1.76513639   | 0.345349764 | 5.111155624  | 3.20194E-07 | 1.91586E-08 |
| GPA73      | 115.4134386 | 1.646285227  | 0.32208461  | 5.111344102  | 3.19875E-07 | 1.91586E-08 |
| HER3       | 2084.457678 | 1.887101856  | 0.36937659  | 5.108883201  | 3.24069E-07 | 1.93277E-08 |
| YDC1       | 1088.666149 | 0.957303775  | 0.187577595 | 5.103508098  | 3.33414E-07 | 1.97572E-08 |
| FOXJ1      | 381.7522603 | 1.683911713  | 0.329925486 | 5.103915227  | 3.32697E-07 | 1.97572E-08 |
| RSPH9      | 621.2758286 | 0.657900861  | 0.12897092  | 5.100912492  | 3.3802E-07  | 1.99659E-08 |
| APOBEC3A   | 84.35135766 | 2.046951041  | 0.40145129  | 5.098877721  | 3.41673E-07 | 2.01172E-08 |
| CSKMT      | 192.4876824 | 0.932171464  | 0.182948888 | 5.095256234  | 3.4827E-07  | 2.04403E-08 |
| ACTR13     | 72.9635071  | 1.066273009  | 0.209513493 | 5.089280864  | 3.59424E-07 | 2.1028E-08  |
| POLR2L     | 6418.282856 | 1.144259938  | 0.224908308 | 5.087671377  | 3.62479E-07 | 2.11396E-08 |
| TNNI2      | 108.8361922 | 1.561771487  | 0.307104613 | 5.085470625  | 3.66716E-07 | 2.12522E-08 |
| HEXB       | 4727.146769 | 1.004618821  | 0.197834422 | 5.085791234  | 3.66031E-07 | 2.12522E-08 |
| TEXT4      | 51.85599687 | -1.058509793 | 0.208231216 | -5.08331647  | 3.70901E-07 | 2.14274E-08 |
| PRP8       | 46.20065594 | 2.40977916   | 0.47416628  | 5.082139458  | 3.73207E-07 | 2.14932E-08 |
| CSTA       | 586.3550061 | 1.924957997  | 0.379154379 | 5.076976829  | 3.83488E-07 | 2.20165E-08 |
| LRRRC15    | 148.6946486 | 2.573745478  | 0.507724883 | 5.069173392  | 3.99547E-07 | 2.27261E-08 |
| LUTP3      | 1436.409133 | 0.858699144  | 0.115629137 | 5.069709312  | 3.98424E-07 | 2.27261E-08 |
| S100A4     | 1920.545164 | 1.660627331  | 0.327552142 | 5.069810625  | 3.98212E-07 | 2.27261E-08 |
| BLVRA      | 2137.487986 | 0.812821009  | 0.160412518 | 5.067067712  | 4.03991E-07 | 2.29081E-08 |
| IL1A       | 113.8695513 | 1.689409221  | 0.333713715 | 5.062450677  | 4.13901E-07 | 2.33981E-08 |
| ADM        | 2346.118392 | 1.610357914  | 0.318162653 | 5.061429742  | 4.16124E-07 | 2.34518E-08 |
| MIF1A      | 100.8114958 | 1.423148721  | 0.281284564 | 5.059462558  | 4.2044E-07  | 2.3628E-08  |
| EMX3       | 4027.410001 | 0.620012794  | 0.122625004 | 5.056169411  | 4.27761E-07 | 2.39611E-08 |
| MEIS2      | 1855.966322 | 0.789046095  | 0.153029707 | 5.05194747   | 4.37238E-07 | 2.44238E-08 |
| GNPNAT1    | 984.4409672 | 0.837410543  | 0.086609738 | 5.050363434  | 4.40977E-07 | 2.45518E-08 |
| ZNF185     | 75.09195288 | 1.141515613  | 0.226221237 | 5.04601216   | 4.51127E-07 | 2.50416E-08 |
| TNNT3      | 26.05851917 | 1.984265002  | 0.393534689 | 5.042160438  | 4.60305E-07 | 2.53223E-08 |
| INAFM1     | 2069.131541 | 1.11763885   | 0.221658415 | 5.04216747   | 4.60288E-07 | 2.53223E-08 |
| PINX1      | 578.2703509 | 0.787288213  | 0.156107167 | 5.043254776  | 4.57679E-07 | 2.53223E-08 |
| SDS        | 2121.309734 | 1.675557483  | 0.333232694 | 5.028190557  | 4.95131E-07 | 2.7157E-08  |
| CMBL       | 1310.412588 | 0.806094737  | 0.175243001 | 5.025627985  | 5.01958E-07 | 2.73686E-08 |
| RSR8       | 2805.003433 | 0.425227334  | 0.084603374 | 5.026127397  | 5.00483E-07 | 2.73686E-08 |
| PKOZ1      | 498.7156857 | 1.899130753  | 0.37802158  | 5.023868818  | 5.06409E-07 | 2.75298E-08 |
| CLEC11A    | 1100.805478 | 0.864091199  | 0.172069507 | 5.021756661  | 5.1201E-07  | 2.77525E-08 |
| ANPEP      | 399.0811631 | 1.367812366  | 0.272467587 | 5.020092048  | 5.16467E-07 | 2.79119E-08 |
| RAB11FP1   | 430.1595511 | 1.177976468  | 0.234743588 | 5.018411222  | 5.21738E-07 | 2.81144E-08 |
| ASIP       | 115.3654677 | 1.760276823  | 0.350890399 | 5.016600137  | 5.25939E-07 | 2.82581E-08 |
| NCTD11     | 1154.891511 | 1.070801115  | 0.200791231 | 5.015530777  | 5.28973E-07 | 2.83313E-08 |
| MEPE       | 3585.563788 | 0.646170562  | 0.128930208 | 5.01178649   | 5.3927E-07  | 2           |

|            |             |              |             |              |             |             |
|------------|-------------|--------------|-------------|--------------|-------------|-------------|
| TME03      | 3378.479477 | 0.85787264   | 0.171366193 | 5.00901671   | 5.471311-07 | 2.89744E-05 |
| TTPA       | 1077.57299  | 0.59117265   | 0.111732538 | 5.004068386  | 5.61128E-07 | 2.95563E-05 |
| FAM07A     | 1047.150113 | 0.101861758  | 0.203855481 | 5.004125434  | 5.61162E-07 | 2.95563E-05 |
| RH0B       | 26388.81968 | -0.62719459  | 0.125373933 | -5.002591658 | 5.65647E-07 | 2.96145E-05 |
| AZG P1     | 2113.018995 | 1.624381725  | 0.324695618 | 5.002783037  | 5.65085E-07 | 2.96145E-05 |
| MWP19      | 793.2385479 | 1.958559297  | 0.391566609 | 5.001854729  | 5.67814E-07 | 2.96437E-05 |
| GPR150     | 103.6573029 | 1.793107451  | 0.358710124 | 4.998764543  | 5.76988E-07 | 2.98689E-05 |
| HST1H2BD   | 355.0257067 | 1.268767432  | 0.253792565 | 4.999230103  | 5.75979E-07 | 2.98689E-05 |
| DU5P14     | 1031.103555 | 0.858462344  | 0.171718327 | 4.999247072  | 5.75546E-07 | 2.98689E-05 |
| CATSPEL1   | 36.96760371 | 1.683183902  | 0.336827477 | 4.997169493  | 5.81779E-07 | 3.00325E-05 |
| LCE1F      | 5.977872937 | 5.477000679  | 1.09659975  | 4.994530301  | 5.89791E-07 | 3.02765E-05 |
| APPCSL     | 2406.931249 | 0.699659597  | 0.140072605 | 4.99497794   | 5.88425E-07 | 3.02765E-05 |
| PERP       | 734.220123  | 1.358265045  | 0.27217815  | 4.990352982  | 6.02691E-07 | 3.08527E-05 |
| TNEM127    | 4556.695302 | 0.517237923  | 0.103716631 | 4.987029713  | 6.13146E-07 | 1.1301E-05  |
| GLA        | 1179.978346 | 0.879828017  | 0.17647638  | 4.985538633  | 6.17926E-07 | 3.14579E-05 |
| ILZRG      | 738.9370382 | 1.722230325  | 0.345612379 | 4.983126939  | 6.25649E-07 | 3.17633E-05 |
| STR6E      | 251.1455073 | 1.75892953   | 0.353516169 | 4.975587491  | 6.50668E-07 | 3.29428E-05 |
| GEMIN7     | 624.6155721 | 0.767765226  | 0.154389507 | 4.972910657  | 6.59551E-07 | 3.3301E-05  |
| BRAP       | 1317.550854 | 0.27522247   | 0.055032286 | 4.970218168  | 6.68776E-07 | 3.36745E-05 |
| GAL E      | 1106.507138 | 0.747079659  | 0.150341055 | 4.969232509  | 6.72184E-07 | 3.37539E-05 |
| HERSL      | 2704.269292 | 1.202137708  | 0.24240408  | 4.959230499  | 7.0773E-07  | 3.54422E-05 |
| QPA3       | 1253.997622 | 0.487982472  | 0.098415688 | 4.958380924  | 7.10831E-07 | 3.55011E-05 |
| TEAD4      | 456.3804958 | 1.463951058  | 0.295325069 | 4.957083607  | 7.15992E-07 | 3.56423E-05 |
| STGAL1     | 3340.276969 | -0.853472132 | 0.172193575 | -4.956469096 | 7.17858E-07 | 3.56588E-05 |
| ZNF19      | 2411.217189 | 0.846888207  | 0.171118519 | 4.949132391  | 7.4545E-07  | 3.69298E-05 |
| AP03C      | 4.255251318 | 5.067450981  | 1.024509148 | 4.945232361  | 7.56673E-07 | 3.73853E-05 |
| RPP25      | 892.3090126 | 0.88406444   | 0.179177123 | 4.934025206  | 8.0552E-07  | 3.95865E-05 |
| TRP10      | 1416.949489 | 0.88617214   | 0.179604295 | 4.934026135  | 8.05537E-07 | 3.95865E-05 |
| IL6        | 185.9930095 | 2.047646421  | 0.415171718 | 4.932046981  | 8.13723E-07 | 3.98833E-05 |
| RRTAP2-3   | 6.858058477 | 5.083483602  | 1.03202202  | 4.925751102  | 8.40369E-07 | 4.108E-05   |
| STARD10    | 2058.031134 | 1.160400579  | 0.236814845 | 4.923966681  | 8.49679E-07 | 4.14252E-05 |
| CDC14B     | 1730.432944 | -0.786373132 | 0.159795726 | -4.921114928 | 8.60526E-07 | 4.18433E-05 |
| SFMBT2     | 1486.268501 | -0.789342537 | 0.160511162 | -4.917680025 | 8.75799E-07 | 4.24005E-05 |
| ASG R2     | 142.4292121 | 1.669038749  | 0.339408303 | 4.917495347  | 8.76585E-07 | 4.24005E-05 |
| MDXL1BP    | 914.9588457 | 0.679202945  | 0.138154353 | 4.916261624  | 8.82125E-07 | 4.25568E-05 |
| KRT8       | 131.430647  | 1.122404132  | 0.228336358 | 4.91557342   | 8.8523E-07  | 4.2595E-05  |
| CTU1       | 617.1923642 | 1.069079087  | 0.217515993 | 4.91494474   | 8.88075E-07 | 4.26207E-05 |
| SFSWAP     | 3674.980605 | -0.506535105 | 0.103082064 | -4.913901454 | 8.92816E-07 | 4.27369E-05 |
| EO2        | 3262.693549 | 0.658359951  | 0.134082878 | 4.910097098  | 9.10313E-07 | 4.34616E-05 |
| TNEM91     | 790.8952383 | 0.945217639  | 0.192524853 | 4.909587638  | 9.12681E-07 | 4.3462E-05  |
| URAL D2    | 4880.796022 | 1.148626789  | 0.233895119 | 4.908881361  | 9.15974E-07 | 4.35064E-05 |
| BLVRB      | 3245.637699 | 0.998469152  | 0.203426072 | 4.908265401  | 9.18855E-07 | 4.3531E-05  |
| TNFS14     | 734.842768  | 1.577928605  | 0.321591227 | 4.906618238  | 9.26554E-07 | 4.37821E-05 |
| HDAC6      | 4322.774363 | -0.355033447 | 0.072367958 | -4.905948088 | 9.29771E-07 | 4.38229E-05 |
| ANG        | 825.6073878 | 1.275153265  | 0.249486188 | 4.903630421  | 9.40814E-07 | 4.42303E-05 |
| EVLB1B     | 1205.548454 | 1.287781505  | 0.262686897 | 4.902343887  | 9.46999E-07 | 4.44077E-05 |
| FAM6A      | 620.9292983 | -0.389374909 | 0.079446445 | -4.901210263 | 9.5248E-07  | 4.44386E-05 |
| FRAME8     | 21.66949306 | 3.800886088  | 0.775439727 | 4.901588035  | 9.50655E-07 | 4.44386E-05 |
| IMPQ2      | 5136.900719 | 0.76663455   | 0.156337634 | 4.900057894  | 9.58084E-07 | 4.45872E-05 |
| POLR2H     | 2031.618814 | 0.775616054  | 0.158935078 | 4.89671815   | 9.74505E-07 | 4.52371E-05 |
| RIN1       | 1750.918608 | 1.413300472  | 0.288875662 | 4.892417936  | 9.96047E-07 | 4.6121E-05  |
| ADAMTS14   | 966.152885  | 1.547892963  | 0.316590405 | 4.889265004  | 1.01215E-06 | 4.66325E-05 |
| AC008397.2 | 413.5767876 | 2.345091602  | 0.479624109 | 4.889436449  | 1.01125E-06 | 4.66325E-05 |
| S100A11    | 14389.0648  | 1.458157899  | 0.298313259 | 4.888008888  | 1.01861E-06 | 4.68128E-05 |
| COL24A1    | 149.5913853 | -1.868778259 | 0.382519649 | -4.885443833 | 1.03196E-06 | 4.73085E-05 |
| TSPO       | 5186.318322 | 1.072855747  | 0.219706802 | 4.881248669  | 1.04418E-06 | 4.76315E-05 |
| RNF198     | 1801.382445 | 0.722026129  | 0.147856893 | 4.883275707  | 1.04337E-06 | 4.76315E-05 |
| UCP1       | 4802.484572 | 1.317994626  | 0.269983439 | 4.881761091  | 1.05143E-06 | 4.78439E-05 |
| TNEM250    | 2101.010867 | 0.590018195  | 0.120896323 | 4.880965144  | 1.0589E-06  | 4.8066E-05  |
| AP251      | 4987.406097 | 0.839130973  | 0.171981294 | 4.879199084  | 1.06518E-06 | 4.82312E-05 |
| LAMB3      | 657.1593629 | 1.28292028   | 0.263057641 | 4.876955029  | 1.07736E-06 | 4.86634E-05 |
| C6orf141   | 412.9032261 | 1.619326391  | 0.332454712 | 4.870817983  | 1.11137E-06 | 5.00769E-05 |
| PLXDC1     | 1228.156142 | -1.201744804 | 0.246790795 | -4.869487949 | 1.11888E-06 | 5.02922E-05 |
| HDHB       | 1110.26534  | 0.711466748  | 0.146171386 | 4.867346263  | 1.13107E-06 | 5.07164E-05 |
| KRT80      | 69.73532187 | 2.552075249  | 0.524583331 | 4.864956814  | 1.14482E-06 | 5.12084E-05 |
| BAK1       | 1256.707889 | 0.907341778  | 0.186735722 | 4.858961998  | 1.18003E-06 | 5.24018E-05 |
| ACD01      | 12.4694576  | 3.445386701  | 0.709038885 | 4.859235188  | 1.1784E-06  | 5.24018E-05 |
| SAT1       | 25631.38244 | 1.055472719  | 0.217186283 | 4.85957735   | 1.17529E-06 | 5.24018E-05 |
| F11R       | 1866.998288 | 1.137907869  | 0.234372556 | 4.855117995  | 1.20315E-06 | 5.33002E-05 |
| RPP27      | 1183.366092 | 0.545796612  | 0.112440477 | 4.854093747  | 1.20939E-06 | 5.34479E-05 |
| NCFE1      | 543.9502385 | 1.681177145  | 0.346450045 | 4.853158977  | 1.2151E-06  | 5.3572E-05  |
| MRE11      | 822.7685532 | -0.408651923 | 0.084216695 | -4.852386123 | 1.21985E-06 | 5.36529E-05 |
| ANGPTL4    | 4599.999148 | 1.243905733  | 0.256520761 | 4.849142534  | 1.23996E-06 | 5.44078E-05 |
| BTN3A1     | 1823.621023 | -0.64898065  | 0.133902324 | -4.846802101 | 1.25467E-06 | 5.49226E-05 |
| RAB24      | 2540.704576 | 0.710505931  | 0.146698496 | 4.843307519  | 1.27695E-06 | 5.57654E-05 |
| LRRK1      | 1827.000009 | -0.582220754 | 0.120224386 | -4.842784174 | 1.28032E-06 | 5.57803E-05 |
| RHO C      | 13445.28691 | 0.923313196  | 0.190734933 | 4.84081853   | 1.29305E-06 | 5.62021E-05 |
| PELO       | 984.4178382 | 0.675907747  | 0.139656766 | 4.839778011  | 1.29844E-06 | 5.63642E-05 |
| CKAP4      | 3538.562224 | 0.928693234  | 0.192154995 | 4.833042848  | 1.34462E-06 | 5.81689E-05 |
| TSPAN4     | 1551.930806 | 0.963712762  | 0.199495219 | 4.830821551  | 1.35971E-06 | 5.84104E-05 |
| VDR        | 164.3684032 | 1.603931299  | 0.332009246 | 4.830983229  | 1.3686E-06  | 5.84104E-05 |
| LY6K       | 36.72651817 | 1.667779087  | 0.345179707 | 4.831625531  | 1.35423E-06 | 5.84104E-05 |
| RAP2B      | 2867.823183 | 0.913857796  | 0.189212796 | 4.829788551  | 1.36678E-06 | 5.85777E-05 |
| VWCE       | 1088.118441 | 1.32692473   | 0.274950486 | 4.827404977  | 1.39268E-06 | 5.95491E-05 |
| TSPAN17    | 2051.599302 | 0.951895502  | 0.120627031 | 4.824444491  | 1.40394E-06 | 5.98917E-05 |
| GLDN14     | 22.29576181 | 2.036222265  | 0.420991699 | 4.823425545  | 1.41113E-06 | 6.00959E-05 |
| AP0BEC2H   | 112.1717372 | 1.74420278   | 0.361785665 | 4.821096989  | 1.42771E-06 | 6.0629E-05  |
| DPPT       | 14610.83902 | 0.860707922  | 0.178655365 | 4.817699838  | 1.45223E-06 | 6.15243E-05 |
| SDSL       | 1767.63395  | 1.320792751  | 0.274263044 | 4.815788268  | 1.4662E-06  | 6.19738E-05 |
| PMPCA      | 2940.518291 | 0.49751538   | 0.103329625 | 4.814837775  | 1.4732E-06  | 6.2127E-05  |
| ORMDL3     | 3268.540792 | 0.4740128    | 0.098326242 | 4.810718485  | 1.50389E-06 | 6.32766E-05 |
| MSANTD3    | 1345.05813  | 0.801722074  | 0.166735939 | 4.808333929  | 1.52193E-06 | 6.389E-05   |
| PSMD2      | 8881.620931 | 0.478192824  | 0.099485837 | 4.806642211  | 1.53486E-06 | 6.42863E-05 |
| BDNF       | 98.95835307 | 1.669930244  | 0.347601364 | 4.804153312  | 1.55408E-06 | 6.49435E-05 |
| MDX        | 17.84404349 | 2.461685389  | 0.512954955 | 4.799208402  | 1.59437E-06 | 6.64766E-05 |
| DBF4B      | 770.903079  | -0.858165979 | 0.179190968 | -4.789114036 | 1.67519E-06 | 6.96888E-05 |
| BRS3       | 5745.339151 | 0.926263774  | 0.193534197 | 4.786047053  | 1.70098E-06 | 7.06022E-05 |
| SZT2       | 3289.459719 | -0.411593289 | 0.086010986 | -4.785362141 | 1.70679E-06 | 7.06842E-05 |
| TWIF2      | 3294.425204 | 0.746214998  | 0.156011118 | 4.783088519  | 1.72621E-06 | 7.12385E-05 |
| NADY       | 4186.436862 | 0.577629504  | 0.120851078 | 4.779680155  | 1.75574E-06 | 7.23861E-05 |
| PLEKHM1    | 23.21290803 | 2.205656403  | 0.46190062  | 4.775175254  | 1.79551E-06 | 7.38603E-05 |
| ABRAC      | 743.9467148 | 1.02718624   | 0.215274197 | 4.771525124  | 1.82836E-06 | 7.50443E-05 |
| TOM1       | 3564.531788 | 0.610561133  | 0.127976858 | 4.770871426  | 1.83431E-06 | 7.51209E-05 |
| CES2       | 4325.840724 | 0.807315422  | 0.169289088 | 4.768836541  | 1.85293E-06 | 7.57154E-05 |
| MRPS12     | 1494.342934 | 0.870786935  | 0.182633853 | 4.767938226  | 1.86121E-06 | 7.58854E-05 |
| ITGAS      | 4052.214909 | 1.31252501   | 0.275736169 | 4.760075597  | 1.9352E-06  | 7.85548E-05 |
| CIB1       | 4436.072101 | 0.867649458  | 0.182272685 | 4.760172686  | 1.93427E-06 | 7.85548E-05 |
| DISC1      | 661.731975  | -0.805335807 | 0.169290992 | -4.757112441 | 1.96382E-06 | 7.95411E-05 |
| CALCA      | 17.51469241 | 2.75239878   | 0.579185533 | 4.752188417  | 2.01227E-06 | 8.13247E-05 |
| LGALS3     | 8674.637661 | 1.046843493  | 0.220336491 | 4.751112667  | 2.023E-06   | 8.15979E-05 |
| LRRRC4     | 936.8067853 | 0.547655508  | 0.115403982 | 4.745551233  | 2.07939E-06 | 8.36706E-05 |
| SILC6A2    | 28.45678592 | 2.180918057  | 0.460124908 | 4.739222857  | 2.14116E-06 | 8.59684E-05 |
| FIG B      | 11120.4509  | 0.467782957  | 0.098772721 | 4.73595793   | 2.18028E-06 | 8.72487E-05 |
| BTSL       | 705.9831399 | 0.973260208  | 0.205552688 | 4.734844006  | 2.19        |             |

|          |             |              |             |              |             |             |
|----------|-------------|--------------|-------------|--------------|-------------|-------------|
| PTHH     | 260.423577  | 1.33837167   | 0.283240256 | 4.725217009  | 2.29876-06  | 9.13241E-05 |
| FAM177B  | 37.49621350 | -1.678235405 | 0.355494902 | -4.720842620 | 2.34876-06  | 9.30841E-05 |
| NCL1     | 1487.536773 | 1.76453852   | 0.312908129 | 4.718489926  | 2.37602E-06 | 9.39649E-05 |
| KRT75    | 120.3607713 | 2.486924985  | 0.527125019 | 4.717903527  | 2.38287E-06 | 9.40342E-05 |
| CAN11    | 2703.411768 | 0.772515659  | 0.163774752 | 4.716939887  | 2.39418E-06 | 9.42787E-05 |
| UACA     | 1502.492793 | -0.646097925 | 0.137021505 | -4.715303086 | 2.41351E-06 | 9.46353E-05 |
| CLU1L05  | 18.62554587 | 3.816464081  | 0.809352586 | 4.715453003  | 2.41174E-06 | 9.46353E-05 |
| CLQ1NF9  | 15.08707463 | -1.499298708 | 0.318221712 | -4.711480923 | 2.45911E-06 | 9.62186E-05 |
| RS1L01   | 4291.649239 | 0.505169522  | 0.107309474 | 4.707594781  | 2.50657E-06 | 9.78677E-05 |
| E1F1AD   | 937.241849  | 0.48747897   | 0.103588614 | 4.705912648  | 2.52733E-06 | 9.84669E-05 |
| CSAD     | 1443.555330 | -0.572060722 | 0.121740187 | -4.699202443 | 2.61401E-06 | 0.000101632 |
| COX13    | 5.203046847 | -1.683347343 | 0.358303225 | -4.698108264 | 2.62582E-06 | 0.000101876 |
| MC1R     | 755.4610779 | 0.993849109  | 0.211881469 | 4.695021792  | 2.66578E-06 | 0.000103209 |
| G55      | 3101.334721 | 0.829253211  | 0.176749599 | 4.691683928  | 2.70966E-06 | 0.000104688 |
| LYZ      | 7555.013776 | 1.924791208  | 0.410586349 | 4.687938483  | 2.75011E-06 | 0.000106192 |
| PWPT1    | 8127.540222 | 0.942376555  | 0.201015904 | 4.687996488  | 2.75893E-06 | 0.000106812 |
| SCIN     | 1560.287618 | -1.366691098 | 0.291934297 | -4.681518167 | 2.84758E-06 | 0.000108879 |
| HNRNPDL  | 14043.36728 | -0.297507652 | 0.063549499 | -4.681511041 | 2.84768E-06 | 0.000108879 |
| ABCD1    | 1715.667633 | 0.891622751  | 0.190427799 | 4.682208988  | 2.838E-06   | 0.000108879 |
| TMEM159  | 383.9335437 | 0.883690119  | 0.188831286 | 4.679786596  | 2.87174E-06 | 0.000109572 |
| HGF1     | 229.5684539 | -1.103709264 | 0.235904564 | -4.678626149 | 2.88803E-06 | 0.000109966 |
| SLCS2A2  | 1885.999128 | 0.793284467  | 0.169589454 | 4.677675679  | 2.90145E-06 | 0.000110249 |
| HST1H1H  | 40.32618123 | 2.095344194  | 0.448038398 | 4.676706732  | 2.91519E-06 | 0.000110543 |
| LTA4H    | 3580.701466 | 0.662891871  | 0.141854842 | 4.673030291  | 2.96788E-06 | 0.00011231  |
| FAM83F   | 80.62024613 | 1.396191213  | 0.298954533 | 4.670245003  | 3.00839E-06 | 0.000113378 |
| NRP518A  | 2285.813903 | 0.705899109  | 0.15113541  | 4.670640105  | 3.00263E-06 | 0.000113378 |
| ATP5VF   | 8318.084401 | 0.701209306  | 0.150321049 | 4.664744624  | 3.09001E-06 | 0.000115979 |
| IL27RA   | 301.149595  | 0.83901544   | 0.179637459 | 4.665037268  | 3.08561E-06 | 0.000115979 |
| DU15F1   | 684.3568993 | 1.463316121  | 0.313760712 | 4.663795538  | 3.10428E-06 | 0.000116278 |
| PGF      | 1007.836472 | 1.521508134  | 0.326514033 | 4.659855255  | 3.16432E-06 | 0.000118047 |
| RGN1     | 6447.628863 | 1.007425871  | 0.216190405 | 4.659899651  | 3.16384E-06 | 0.000118047 |
| RPS28    | 19819.20254 | 0.976991916  | 0.209701859 | 4.658956871  | 3.17816E-06 | 0.000118324 |
| SHBG RL3 | 12756.13944 | 0.921135441  | 0.197851629 | 4.656597694  | 3.21478E-06 | 0.000119446 |
| TRAPP3   | 3460.880433 | 0.926411814  | 0.199050136 | 4.654163182  | 3.25299E-06 | 0.000120622 |
| CCDC107  | 1742.232544 | 0.902418007  | 0.194023539 | 4.651074871  | 3.30209E-06 | 0.000121217 |
| SLC43A3  | 2136.647903 | 1.069823711  | 0.230151772 | 4.648340107  | 3.34617E-06 | 0.00012358  |
| FUT11    | 842.4660242 | 0.34472225   | 0.07425188  | 4.642605716  | 3.44043E-06 | 0.000126302 |
| AFM2     | 839.900879  | 0.661598213  | 0.142495798 | 4.642931378  | 3.435E-06   | 0.000126302 |
| NCO1N1   | 2740.281533 | 0.746031435  | 0.160665171 | 4.643392396  | 3.42735E-06 | 0.000126302 |
| ALAS1    | 2183.373379 | 0.471371165  | 0.101545005 | 4.641990566  | 3.45059E-06 | 0.000126427 |
| UVBRG    | 1266.64942  | -0.645913767 | 0.139211001 | -4.639818418 | 3.48715E-06 | 0.000127137 |
| FAM110B  | 3740.161977 | 0.622716583  | 0.134229399 | 4.639197029  | 3.49765E-06 | 0.000127137 |
| FAM1     | 959.4894701 | 0.338979722  | 0.073066570 | 4.639574641  | 3.49127E-06 | 0.000127137 |
| MGAT1    | 7308.824229 | 0.717140813  | 0.154551402 | 4.640142543  | 3.48109E-06 | 0.000127137 |
| DELE1    | 8126.700431 | -0.235374126 | 0.090746038 | -4.638279256 | 3.51327E-06 | 0.000127279 |
| SMPD2    | 513.3541793 | 0.614236273  | 0.132413124 | 4.638157382  | 3.51538E-06 | 0.000127279 |
| SFXN2    | 392.1863136 | -0.610148723 | 0.131568859 | -4.637485839 | 3.52673E-06 | 0.000127379 |
| ABVD14B  | 2250.270471 | 0.801829312  | 0.172913206 | 4.637177978  | 3.53198E-06 | 0.000127379 |
| ARM7     | 627.1803396 | 0.584536212  | 0.12609002  | 4.635864222  | 3.55449E-06 | 0.000127443 |
| HER5     | 2631.959599 | 1.091813427  | 0.235497046 | 4.63620858   | 3.54858E-06 | 0.000127443 |
| LAMTOR2  | 3013.625024 | 0.931834907  | 0.200976894 | 4.636527561  | 3.54311E-06 | 0.000127443 |
| GINS     | 7463.181809 | 0.830481769  | 0.179234188 | 4.633500885  | 3.59533E-06 | 0.000128657 |
| FCE2     | 27.90095272 | 2.409210582  | 0.520019455 | 4.632923938  | 3.60537E-06 | 0.000128766 |
| PRR13    | 6677.772372 | 0.721879322  | 0.155883367 | 4.630893819  | 3.64091E-06 | 0.000129784 |
| TIMM17A  | 2357.074357 | 0.556596501  | 0.120242467 | 4.628951095  | 3.67523E-06 | 0.000130754 |
| IL17RC   | 1610.875749 | 0.560153216  | 0.121066118 | 4.628489189  | 3.68343E-06 | 0.000130794 |
| RII2     | 648.3559863 | 1.09738887   | 0.236179818 | 4.625265736  | 3.74118E-06 | 0.000132081 |
| UQC3     | 1206.508694 | 1.027552403  | 0.222153417 | 4.625418319  | 3.73943E-06 | 0.000132081 |
| DHSL13   | 891.6809724 | 0.840464482  | 0.181866997 | 4.625897209  | 3.72989E-06 | 0.000132081 |
| ZDHC13   | 1611.124664 | 0.670295493  | 0.144954752 | 4.624170545  | 3.761E-06   | 0.000132527 |
| CRABP2   | 348.2470467 | 1.362386333  | 0.294691813 | 4.623088508  | 3.78068E-06 | 0.000132966 |
| RTL5     | 1391.139789 | 0.733743308  | 0.15880919  | 4.620282407  | 3.83218E-06 | 0.00013452  |
| TACR2    | 60.96772258 | 1.033148956  | 0.223750398 | 4.617417287  | 3.88545E-06 | 0.000136131 |
| NBP1L2   | 1846.251632 | -0.748162338 | 0.162136071 | -4.614410181 | 3.94213E-06 | 0.00013766  |
| RBP12    | 1435.096288 | 0.650847976  | 0.141049915 | 4.614309594  | 3.94404E-06 | 0.00013766  |
| NAT16    | 156.707946  | 1.482428845  | 0.321312022 | 4.613673758  | 3.95613E-06 | 0.000137821 |
| NAN5     | 1863.052332 | 0.802962584  | 0.174119121 | 4.611570404  | 3.99638E-06 | 0.000138699 |
| CTSD     | 89905.60666 | 1.18901938   | 0.257816764 | 4.611877679  | 3.99048E-06 | 0.000138699 |
| ML       | 7.952133444 | 4.514111403  | 0.979114777 | 4.610400548  | 4.01894E-06 | 0.00013922  |
| BTIN     | 765.8970011 | -0.741234229 | 0.160899961 | -4.606821808 | 4.0887E-06  | 0.000141106 |
| BLOC1L4  | 656.2517123 | 0.731286501  | 0.158731323 | 4.605951722  | 4.08507E-06 | 0.000141106 |
| ITIH     | 32.17654584 | 2.049367307  | 0.445228398 | 4.602957414  | 4.16533E-06 | 0.000143482 |
| TNFRSF18 | 108.9452429 | 1.441569704  | 0.315876007 | 4.59702383   | 4.28569E-06 | 0.000147352 |
| HST2H2A3 | 939.7412979 | 2.16122466   | 0.470235711 | 4.596045379  | 4.30585E-06 | 0.00014777  |
| TMEM25L  | 875.7218029 | 0.699915889  | 0.152518256 | 4.589063011  | 4.4524E-06  | 0.000152519 |
| XCL1     | 8.812174827 | -1.911553662 | 0.416829568 | -4.585975464 | 4.51872E-06 | 0.0001545   |
| METRN1   | 2149.231716 | 1.16603054   | 0.254358693 | 4.584197713  | 4.55733E-06 | 0.000155331 |
| PLEKH1   | 2422.292033 | 0.712493893  | 0.155557169 | 4.580270364  | 4.64375E-06 | 0.000158188 |
| CTSA     | 10837.46943 | 0.861967428  | 0.188286207 | 4.577963739  | 4.69524E-06 | 0.000159647 |
| SECTM1   | 555.0111309 | 1.58398563   | 0.346075629 | 4.576992706  | 4.71708E-06 | 0.000160094 |
| SRPB     | 2452.241373 | 0.613758215  | 0.13417723  | 4.574235241  | 4.77963E-06 | 0.000161919 |
| PRELID1  | 4412.4601   | 0.68429218   | 0.149785165 | 4.568491016  | 4.91248E-06 | 0.000166114 |
| ANXA8L1  | 14.67058631 | 3.029530748  | 0.66323905  | 4.567781023  | 4.92915E-06 | 0.000166372 |
| CT170A9  | 2836.524201 | 0.843408007  | 0.184783111 | 4.563944666  | 5.02013E-06 | 0.000168825 |
| ITICD1   | 597.539117  | 1.26203707   | 0.276504388 | 4.564256799  | 5.01267E-06 | 0.000168825 |
| PWPT1    | 1628.143004 | -0.504107315 | 0.110604987 | -4.557726533 | 5.17102E-06 | 0.000173582 |
| LCN2     | 56.52549297 | 2.681341923  | 0.588602776 | 4.550435405  | 5.22772E-06 | 0.000175167 |
| TFPI1    | 1980.47468  | 0.453066161  | 0.099480678 | 4.554331164  | 5.2557E-06  | 0.000175785 |
| TRB1     | 1630.935661 | 0.837751355  | 0.18400528  | 4.552865846  | 5.2927E-06  | 0.000176678 |
| PHX      | 1669.03479  | 0.272266013  | 0.05983444  | 4.550322753  | 5.35637E-06 | 0.000178504 |
| APOE     | 254438.7261 | 1.278296859  | 0.281111853 | 4.547289078  | 5.43413E-06 | 0.000180768 |
| TP1      | 26062.63512 | 0.624041731  | 0.137295858 | 4.545233478  | 5.48744E-06 | 0.000182213 |
| TIAF1    | 983.5653033 | -0.96906411  | 0.213380617 | -4.541481433 | 5.58603E-06 | 0.000184159 |
| ZNFS1    | 757.4093019 | 0.719995017  | 0.158537373 | 4.541484469  | 5.58995E-06 | 0.000184159 |
| PLD3     | 22910.89111 | 0.826529333  | 0.181992231 | 4.541563835  | 5.58385E-06 | 0.000184159 |
| LMNA     | 12741.72414 | 0.957936846  | 0.210915986 | 4.541793451  | 5.57777E-06 | 0.000184159 |
| SLC20A1  | 2976.984369 | 0.523634311  | 0.115345659 | 4.539696575  | 5.63352E-06 | 0.000185393 |
| TMEM238  | 79.6894451  | 1.322796293  | 0.291475944 | 4.538273383  | 5.67166E-06 | 0.000185984 |
| RMG1     | 2236.269107 | 0.747397316  | 0.164681391 | 4.53844478   | 5.65708E-06 | 0.000185984 |
| CE90B1   | 326.7578482 | 1.179243718  | 0.259668083 | 4.536095623  | 5.73052E-06 | 0.0001875   |
| SLC28A   | 2796.612453 | 1.131055201  | 0.249449121 | 4.53421242   | 5.78188E-06 | 0.000188926 |
| ORM1     | 18.24453884 | 3.27410505   | 0.722584453 | 4.531103705  | 5.86763E-06 | 0.000191389 |
| NWPI2    | 43.3965937  | 2.943568941  | 0.649878045 | 4.529417427  | 5.91465E-06 | 0.000192582 |
| KCN E1   | 82.53938757 | 1.247138345  | 0.275458155 | 4.527505626  | 5.96844E-06 | 0.000193989 |
| LAMP3    | 147.9917927 | 1.692674278  | 0.374039438 | 4.525383885  | 6.02843E-06 | 0.000195599 |
| TMEM8A   | 3216.89733  | 0.651584808  | 0.143999611 | 4.524906711  | 6.04222E-06 | 0.000195698 |
| BMP4     | 149.0343191 | 1.199335264  | 0.264585876 | 4.520026851  | 6.18318E-06 | 0.000199912 |
| TCTN3    | 1501.269109 | 0.550468817  | 0.121885338 | 4.516284115  | 6.29342E-06 | 0.00020312  |
| BAG1     | 5371.933976 | 0.782311969  | 0.173289682 | 4.514475189  | 6.34738E-06 | 0.000204503 |
| NOS3PDL  | 442.3237868 | 0.605668298  | 0.134181227 | 4.513806486  | 6.36743E-06 | 0.000204791 |
| GRPPL1   | 1557.827208 | 0.478404936  | 0.106013889 | 4.512662922  | 6.40188E-06 | 0.00020954  |
| RNASEK   | 10772.9923  | 0.918468617  | 0.203582169 | 4.511573684  | 6.42593E-06 | 0.000206279 |
| SLC45    | 227.6594076 | -1.046174001 | 0.231099186 | -4.509464365 | 6.49915E-06 | 0.000207741 |
| TOR1AP2  | 2782.14324  | 0.294435912  | 0.06529528  | 4.5          |             |             |

|           |             |              |             |              |              |             |
|-----------|-------------|--------------|-------------|--------------|--------------|-------------|
| MCL2      | 736441070   | -2.31485831  | 0.51434227  | -4.50147657  | 6.74835-06   | 0.000214423 |
| MED8      | 592.937804  | 0.59758635   | 0.13277510  | 4.50073264   | 6.71177E-06  | 0.000214797 |
| MBAN102   | 606.0812034 | -0.54892741  | 0.121998672 | -4.49945398  | 6.81282E-06  | 0.000215728 |
| PPCC      | 671.9630507 | 0.883638954  | 0.196416376 | 4.498804909  | 6.83365E-06  | 0.000216016 |
| RANRP17   | 136.3909943 | -1.054623541 | 0.234500928 | -4.497138139 | 6.88742E-06  | 0.000217943 |
| ZNFS63    | 170.5551968 | 0.702892321  | 0.156329821 | 4.496213945  | 6.91741E-06  | 0.000217916 |
| ANKR033   | 18.35322591 | 2.759075554  | 0.613986603 | 4.493710394  | 6.99928E-06  | 0.000220119 |
| IL11      | 135.3357258 | 1.857826608  | 0.413688174 | 4.491054371  | 7.08715E-06  | 0.000222903 |
| SILC10A3  | 850.6850501 | 0.722444526  | 0.160862202 | 4.48828688   | 7.17982E-06  | 0.000223508 |
| DU5P23    | 1540.39454  | 0.906276369  | 0.201917192 | 4.488356633  | 7.17747E-06  | 0.000223508 |
| CboF8     | 601.4646730 | 0.52586399   | 0.117158828 | 4.488470393  | 7.17364E-06  | 0.000223508 |
| AUJA      | 401.7185479 | 1.318370739  | 0.293721365 | 4.485908141  | 7.17237E-06  | 0.000223508 |
| SILC16A6  | 390.9193821 | 1.069073498  | 0.238187744 | 4.489665445  | 7.13351E-06  | 0.000223508 |
| OVCA2     | 1546.595907 | 0.76091802   | 0.169636093 | 4.485590508  | 7.27212E-06  | 0.000225972 |
| MWR3      | 3802.279045 | -0.291983360 | 0.065106699 | -4.484690123 | 7.3073E-06   | 0.000226540 |
| WFS3A     | 1538.628992 | 0.2856723    | 0.063929167 | 4.482578244  | 7.27464E-06  | 0.000228419 |
| DMT1      | 8766.259067 | -0.654703862 | 0.146109651 | -4.480907426 | 7.43263E-06  | 0.000229826 |
| WFDCC     | 307.3221674 | 0.964150088  | 0.215311899 | 4.477922916  | 7.53728E-06  | 0.000232671 |
| SCART1    | 254.5163393 | -1.211523018 | 0.270694658 | -4.475604111 | 7.61956E-06  | 0.000234817 |
| TPS3IN P2 | 38983.27437 | -1.121942231 | 0.250729725 | -4.47470769  | 7.65159E-06  | 0.000235411 |
| DSP       | 382.2237508 | 1.443476677  | 0.322706836 | 4.473027883  | 7.71197E-06  | 0.000236086 |
| TMD02     | 2276.244064 | 0.463997789  | 0.103728141 | 4.473210288  | 7.70539E-06  | 0.000236086 |
| RMS       | 1725.063838 | 0.561203096  | 0.125446767 | 4.473635393  | 7.69008E-06  | 0.000236086 |
| BIRC7     | 435.6748564 | 1.800079085  | 0.40261366  | 4.47098363   | 7.78607E-06  | 0.000236781 |
| TNP1      | 5508.394215 | 0.690746094  | 0.154486519 | 4.471238548  | 7.77679E-06  | 0.000236781 |
| LAG E3    | 2027.369868 | 0.804052059  | 0.179811328 | 4.471642967  | 7.76209E-06  | 0.000236781 |
| CNFN      | 73.75362819 | 1.262368217  | 0.282280426 | 4.472035957  | 7.74784E-06  | 0.000236781 |
| STG0ALNCA | 1010.886308 | 0.519730354  | 0.116303299 | 4.468749885  | 7.86781E-06  | 0.000238873 |
| FN01      | 691.2197702 | 0.767210405  | 0.171712661 | 4.467989722  | 7.89581E-06  | 0.000239329 |
| PE1       | 4210.428442 | 0.806038154  | 0.180565648 | 4.464186767  | 8.03734E-06  | 0.000243219 |
| NBP1      | 1541.933723 | 1.213486974  | 0.271873154 | 4.463430664  | 8.06577E-06  | 0.000243679 |
| APL14     | 6.748096601 | 3.303838884  | 0.740445175 | 4.461963209  | 8.112127E-06 | 0.000244952 |
| MBOA7     | 4398.216523 | 0.701454173  | 0.157600543 | 4.450836029  | 8.55366E-06  | 0.000257574 |
| MPS2      | 2058.104349 | 0.621205925  | 0.139664208 | 4.447833422  | 8.67327E-06  | 0.000260325 |
| MCA       | 591.509264  | 1.064193731  | 0.239253971 | 4.447820755  | 8.66808E-06  | 0.000260325 |
| FOLR3     | 27.53160425 | 2.104590957  | 0.473294003 | 4.446688405  | 8.72042E-06  | 0.000261315 |
| CLP1      | 447.2972964 | 0.78252061   | 0.177343051 | 4.444786844  | 8.79791E-06  | 0.000262357 |
| CD8P2     | 5802.519375 | 0.529949722  | 0.119290111 | 4.444805137  | 8.79716E-06  | 0.000262357 |
| ASG R1    | 282.5817138 | 0.983059941  | 0.221167746 | 4.444861242  | 8.79486E-06  | 0.000262357 |
| LMW2      | 6041.590009 | 0.738638416  | 0.166297563 | 4.44165712   | 8.92646E-06  | 0.00026576  |
| TPS3K     | 1065.45709  | 0.534678406  | 0.120485857 | 4.438691763  | 9.05073E-06  | 0.000269026 |
| SELP      | 41.65306654 | 2.250595608  | 0.507225931 | 4.437067329  | 9.11928E-06  | 0.000270627 |
| AGTRAP    | 3073.39201  | 0.966168954  | 0.217774388 | 4.436559158  | 9.14083E-06  | 0.00027083  |
| MWR8      | 609.0120992 | 0.622264505  | 0.140295928 | 4.435371116  | 9.19138E-06  | 0.000271891 |
| TPA1      | 4750.177198 | -0.655264276 | 0.147794902 | -4.433606038 | 9.26699E-06  | 0.00027325  |
| LRAP1     | 8189.806503 | 0.823784041  | 0.185802668 | 4.433650227  | 9.26509E-06  | 0.00027325  |
| KLHC3B    | 1358.70124  | 0.646585553  | 0.145893189 | 4.431910469  | 9.34018E-06  | 0.000274968 |
| RPP2L     | 968.5280373 | 0.804847061  | 0.182463906 | 4.430942417  | 9.38221E-06  | 0.000275765 |
| RBMO2     | 1108.560879 | 0.65271763   | 0.147380716 | 4.428785859  | 9.47651E-06  | 0.000278093 |
| ICAM4     | 46.96977142 | 1.332768091  | 0.301125832 | 4.425950718  | 9.60184E-06  | 0.000281323 |
| PIP       | 3.718161883 | 4.779430997  | 1.080370566 | 4.423879156  | 9.69443E-06  | 0.000283583 |
| G.GCT     | 1571.151501 | 0.592360203  | 0.133915496 | 4.423388051  | 9.71655E-06  | 0.00028378  |
| ADCK1     | 835.281999  | -0.516417906 | 0.116773074 | -4.422405685 | 9.7608E-06   | 0.000284623 |
| FUS3      | 420.0407076 | 0.505192311  | 0.114253794 | 4.42167001   | 9.7941E-06   | 0.000284693 |
| KLH 34    | 31.89777445 | 1.251587958  | 0.283052488 | 4.421752221  | 9.79037E-06  | 0.000284693 |
| MWN2A1    | 4106.624503 | -0.972782122 | 0.220040601 | -4.420851527 | 9.83127E-06  | 0.000285324 |
| CTTC6     | 3047.597646 | 0.698049711  | 0.157027446 | 4.420065084  | 9.85707E-06  | 0.000285912 |
| MTP2      | 498.9278192 | 0.957436079  | 0.216702494 | 4.418205307  | 9.95238E-06  | 0.000287932 |
| CLEC4D    | 20.77242193 | 2.83322988   | 0.641556134 | 4.416181144  | 1.00495E-05  | 0.000290182 |
| SILC16A3  | 3760.233764 | 1.169579872  | 0.264880587 | 4.415491974  | 1.00781E-05  | 0.000290655 |
| WDR74     | 2019.706377 | 0.842844366  | 0.190901196 | 4.415081649  | 1.00972E-05  | 0.000290752 |
| AGRP      | 20.54729371 | 1.559042648  | 0.353144967 | 4.414738408  | 1.01132E-05  | 0.000290759 |
| LGAL51    | 23125.03687 | 1.095064411  | 0.248136478 | 4.413133681  | 1.01876E-05  | 0.00029244  |
| NDFAF8    | 3363.071649 | 0.895003434  | 0.202838633 | 4.412391365  | 1.02235E-05  | 0.000293016 |
| RALGAP2   | 1284.720713 | -0.553455258 | 0.125501952 | -4.409933461 | 1.03402E-05  | 0.000295056 |
| NBP11     | 917.7064649 | -0.59998246  | 0.136057694 | -4.40888103  | 1.03427E-05  | 0.000295056 |
| SMO3      | 4.69154191  | 3.121442214  | 0.707770744 | 4.410244756  | 1.03254E-05  | 0.000295056 |
| ATOX1     | 5696.108213 | 1.113806508  | 0.252599919 | 4.409370004  | 1.03672E-05  | 0.000295296 |
| PIWI      | 1565.145793 | 0.87395043   | 0.198330025 | 4.40654126   | 1.05034E-05  | 0.000297339 |
| CLIC1     | 9900.04867  | 1.092580153  | 0.247943855 | 4.40562751   | 1.05024E-05  | 0.000297339 |
| NR10A     | 1853.7032   | 0.53505441   | 0.121418208 | 4.405632546  | 1.04995E-05  | 0.000297339 |
| FAM62A    | 3738.95021  | 0.479543701  | 0.108913405 | 4.405651645  | 1.04981E-05  | 0.000297339 |
| SPAG17    | 65.31951404 | -1.569135026 | 0.356254421 | -4.405096288 | 1.05737E-05  | 0.000297995 |
| NHLI2     | 212.1941705 | 1.417804038  | 0.321838752 | 4.40534191   | 1.05626E-05  | 0.000297995 |
| SMGP      | 109.8242154 | 1.013213102  | 0.229989346 | 4.405557121  | 1.05512E-05  | 0.000297995 |
| RDH14     | 813.9403872 | 0.369994193  | 0.084050493 | 4.402046653  | 1.07234E-05  | 0.000301714 |
| LOF1      | 3136.351593 | 0.671959691  | 0.152672766 | 4.401306856  | 1.07601E-05  | 0.000302283 |
| CLIQ1NF12 | 177.0690282 | 1.24621926   | 0.28332874  | 4.398117597  | 1.09194E-05  | 0.000306291 |
| AP0A1     | 38.87327847 | 1.187329491  | 0.270042332 | 4.396828988  | 1.09844E-05  | 0.000307646 |
| UBE2J     | 2724.916524 | 0.548086064  | 0.12466539  | 4.396457309  | 1.10032E-05  | 0.000307706 |
| CHKA      | 3522.81051  | -0.51692626  | 0.117329739 | -4.395242253 | 1.10649E-05  | 0.000308496 |
| GPR157    | 175.6205586 | 1.010065171  | 0.229794455 | 4.395515867  | 1.10515E-05  | 0.000308496 |
| SARS      | 9048.317982 | 0.553482685  | 0.125981105 | 4.393378546  | 1.11603E-05  | 0.000310215 |
| COA7      | 975.615880  | 0.376343843  | 0.085661096 | 4.393404465  | 1.11589E-05  | 0.000310215 |
| MEGFD     | 54.56974977 | -0.99289075  | 0.226168803 | -4.39004791  | 1.13228E-05  | 0.000314537 |
| SILC35C1  | 1114.813098 | 0.631227139  | 0.143817692 | 4.389078499  | 1.13832E-05  | 0.00031546  |
| PPP4C     | 8974.336542 | 0.702398265  | 0.160055714 | 4.388461042  | 1.14156E-05  | 0.000315882 |
| CD40      | 612.0091643 | 1.139974779  | 0.259804498 | 4.387817719  | 1.14494E-05  | 0.000316342 |
| NAB2      | 1527.696274 | 0.735712981  | 0.167786934 | 4.384804972  | 1.16099E-05  | 0.000320272 |
| FDX3P     | 31.46801647 | 5.707928864  | 1.302100186 | 4.38363263   | 1.16717E-05  | 0.00032152  |
| GOSR2     | 3131.979388 | 0.261104324  | 0.059610412 | 4.380179802  | 1.18581E-05  | 0.00032617  |
| APEH      | 3651.064632 | 0.48863477   | 0.111577209 | 4.379342126  | 1.19038E-05  | 0.000326938 |
| ARHGAP1   | 7386.843258 | -0.470972956 | 0.10757915  | -4.377920404 | 1.19817E-05  | 0.00032806  |
| BMP2      | 395.9672184 | 1.028250567  | 0.234887878 | 4.377622952  | 1.19981E-05  | 0.00032806  |
| GLMP      | 2819.053934 | 0.860482064  | 0.196543005 | 4.378085408  | 1.19726E-05  | 0.00032806  |
| DDR2      | 2046.49149  | 0.913992376  | 0.208811947 | 4.377107667  | 1.20265E-05  | 0.000328349 |
| NRP2      | 10433.51211 | -0.708234621 | 0.161855055 | -4.375733715 | 1.21025E-05  | 0.000329935 |
| KCNNA     | 311.0769507 | 1.355189512  | 0.30993498  | 4.371670906  | 1.22299E-05  | 0.00033564  |
| CD384B4.3 | 285.8031324 | 0.924489644  | 0.21157393  | 4.369589018  | 1.24481E-05  | 0.000338256 |
| SPN       | 483.0325782 | 1.107848421  | 0.253730807 | 4.366235267  | 1.26406E-05  | 0.000343084 |
| RPL36     | 18692.36023 | 0.898292733  | 0.205840398 | 4.364029685  | 1.27688E-05  | 0.000344054 |
| RIS1      | 1051.757173 | 0.740740515  | 0.169771202 | 4.361169414  | 1.28192E-05  | 0.000346908 |
| POL04     | 3065.821897 | 0.965964053  | 0.221441176 | 4.362169987  | 1.28799E-05  | 0.000347986 |
| NEM       | 23.48702769 | 2.525426799  | 0.579397766 | 4.358709931  | 1.30831E-05  | 0.000353015 |
| BRF2      | 788.1001631 | 0.488090746  | 0.111991117 | 4.358298762  | 1.31077E-05  | 0.000353162 |
| DNAM1     | 1392.268056 | -0.823725098 | 0.18919568  | -4.353826133 | 1.33782E-05  | 0.000359922 |
| LAYN      | 3222.062777 | 1.123511643  | 0.258071602 | 4.353488086  | 1.33988E-05  | 0.000359922 |
| WDR54     | 910.7131049 | 0.774299473  | 0.177939048 | 4.35147831   | 1.35223E-05  | 0.000362739 |
| CCDC191   | 598.8038974 | -0.607150548 | 0.139591984 | -4.349465705 | 1.3647E-05   | 0.000365552 |
| NETTL7B   | 2891.219702 | 1.169461404  | 0.269055242 | 4.345647546  | 1.38297E-05  | 0.00036991  |
| HRAS      | 3746.541318 | 0.892099602  | 0.205319288 | 4.344938338  | 1.39315E-05  | 0.000372091 |
| RTL10     | 950.6771977 | 0.590516013  | 0.135919408 | 4.344604138  | 1.39527E-05  | 0.000372119 |
| DEC2      | 1164.952816 | 0.707386705  | 0.162891124 | 4.342696454  | 1.40745E-05  | 0.000374824 |
| NUPI1     | 9142.127162 | 1.130330913  | 0.260481876 | 4.33984103   | 1.42883E-05  |             |

|            |             |              |              |              |             |             |
|------------|-------------|--------------|--------------|--------------|-------------|-------------|
| GCUC2D     | 19.78418532 | 1.576951216  | 0.363571931  | 4.37391073   | 1.441845-05 | 0.000381771 |
| MA2D11     | 58.70829307 | 1.390020455  | 0.320634344  | 4.335167089  | 1.456495-05 | 0.000385104 |
| ADDARA     | 876.7410972 | 1.202099945  | 0.2774525    | 4.334466224  | 1.461155-05 | 0.000385781 |
| VWAF8      | 3968.568763 | 1.367188928  | 0.315509487  | 4.333907488  | 1.464865-05 | 0.000386207 |
| NIN11      | 7583.676144 | 0.868407315  | 0.200407377  | 4.333210319  | 1.469515-05 | 0.000386879 |
| S100A0     | 14607.80748 | 1.159496073  | 0.267654449  | 4.332063515  | 1.477185-05 | 0.000388345 |
| SLC25A3    | 11930.41903 | 0.3523714    | 0.081402119  | 4.328774298  | 1.499425-05 | 0.000393628 |
| ELMD1      | 4728.188891 | -0.855482058 | 0.197738895  | -4.326321619 | 1.516275-05 | 0.000396904 |
| MLC        | 7502.689956 | 0.373366021  | 0.086294794  | 4.32663438   | 1.514055-05 | 0.000396904 |
| SF385      | 4649.463026 | 0.750320433  | 0.173478887  | 4.325139778  | 1.524355-05 | 0.000398472 |
| AKDA       | 14.95996187 | 1.068812133  | 0.247214635  | 4.323417724  | 1.536355-05 | 0.000401028 |
| AC008763.3 | 81.12877922 | 4.454555237  | 1.03072334   | 4.321775848  | 1.547785-05 | 0.000403453 |
| R0813      | 5152.07327  | 0.72773718   | 0.168432378  | 4.320648977  | 1.555715-05 | 0.000404946 |
| MLPH       | 178.68954   | 1.377238942  | 0.318870685  | 4.319114121  | 1.566575-05 | 0.000407197 |
| FE5A       | 3483.843216 | -0.876131912 | 0.193953869  | -4.318673571 | 1.569755-05 | 0.000407438 |
| SPP58      | 3256.489562 | 0.369900718  | 0.085660508  | 4.318217683  | 1.572945-05 | 0.000407704 |
| BD         | 8985.127307 | 1.03676262   | 0.240242185  | 4.315489478  | 1.592555-05 | 0.000412194 |
| ZNF708     | 1224.79428  | -0.928932723 | 0.21530739   | -4.314519702 | 1.599555-05 | 0.000413425 |
| GMDA       | 10745.35569 | 0.87162876   | 0.202116738  | 4.312501619  | 1.614185-05 | 0.000416634 |
| FAMIL10A   | 376.3399794 | 1.054780198  | 0.244741399  | 4.309774321  | 1.634215-05 | 0.000421215 |
| TXLNA      | 4297.281732 | 0.615282459  | 0.142793438  | 4.308898706  | 1.640695-05 | 0.000421707 |
| ADRM1      | 5843.651837 | 0.733139382  | 0.170143413  | 4.308495444  | 1.640325-05 | 0.000421707 |
| RD518      | 197.9324531 | -0.766199875 | 0.177803864  | -4.306819762 | 1.656185-05 | 0.000424345 |
| POLR1C     | 790.5529601 | 0.515229537  | 0.119637331  | 4.306599503  | 1.657875-05 | 0.000424345 |
| BDK41      | 3960.793537 | 0.476364596  | 0.110607126  | 4.306819496  | 1.656195-05 | 0.000424345 |
| FDK1       | 1045.457694 | 0.571121542  | 0.132652935  | 4.305381866  | 1.666985-05 | 0.000426085 |
| ENP3       | 5409.679941 | 1.212050631  | 0.281575813  | 4.304526785  | 1.673435-05 | 0.000427142 |
| NCLN       | 4027.06188  | 0.5959042    | 0.138453069  | 4.304017427  | 1.677285-05 | 0.000427534 |
| MAJ1       | 2046.547407 | 0.488505363  | 0.11364632   | 4.298470311  | 1.719815-05 | 0.000437767 |
| GGD7       | 21.61560492 | 2.504362852  | 0.582745103  | 4.29752707   | 1.727145-05 | 0.000438028 |
| IMP3       | 2463.714724 | 0.485990027  | 0.113105531  | 4.296784003  | 1.732945-05 | 0.000439894 |
| TFAP2C     | 65.98976448 | 1.340932767  | 0.312174738  | 4.295455733  | 1.743355-05 | 0.000441928 |
| ANAPC13    | 2786.073853 | 4.30042708   | 0.100127665  | 4.294943931  | 1.747375-05 | 0.00044234  |
| PATL2      | 121.5782857 | -0.997332533 | 0.232394286  | -4.291553585 | 1.774275-05 | 0.000447701 |
| BSD2       | 277.4296148 | 0.670911418  | 0.156340133  | 4.291357598  | 1.775845-05 | 0.000447701 |
| HCC5       | 700.9370443 | 0.560451848  | 0.130691806  | 4.291631026  | 1.773655-05 | 0.000447701 |
| CSAR1      | 2103.191476 | 1.410984883  | 0.329101609  | 4.287383731  | 1.807955-05 | 0.000455161 |
| TRIM2      | 15.00711501 | 1.461840478  | 0.341098789  | 4.285680642  | 1.821815-05 | 0.000457412 |
| TYSD1      | 869.2378856 | 0.734295622  | 0.171327093  | 4.285928216  | 1.819785-05 | 0.000457412 |
| UGG12      | 796.8918903 | -0.475524946 | 0.110971076  | -4.28512514  | 1.826365-05 | 0.000457933 |
| PRG1       | 1401.772583 | 0.539056924  | 0.125846828  | 4.283436796  | 1.840285-05 | 0.000460796 |
| STXB2      | 2045.635904 | 1.063842577  | 0.248429833  | 4.282265779  | 1.851555-05 | 0.000461348 |
| CCDC51     | 797.5132009 | 0.773485236  | 0.180620367  | 4.282381386  | 1.849045-05 | 0.000461348 |
| TMJ81      | 2860.725042 | 0.750340495  | 0.175212422  | 4.282461529  | 1.848375-05 | 0.000461348 |
| ISG20      | 1180.422673 | 1.208960933  | 0.282702062  | 4.276448931  | 1.898985-05 | 0.000472922 |
| BCAP31     | 8891.951833 | 0.588551198  | 0.13767043   | 4.27507343   | 1.910745-05 | 0.00047521  |
| CL60B9     | 1837.57669  | 0.962295401  | 0.225193512  | 4.273193268  | 1.926935-05 | 0.000478591 |
| ARSA       | 5350.190841 | 0.854071278  | 0.199888004  | 4.272749051  | 1.930785-05 | 0.000478591 |
| MRPL17     | 1827.526237 | 0.72602979   | 0.169947336  | 4.272089435  | 1.936555-05 | 0.000479674 |
| PAN2       | 2629.673827 | -0.60675278  | 0.142192866  | -4.267116359 | 1.980165-05 | 0.00048983  |
| DNITP2     | 2233.375094 | 0.358522478  | 0.084025952  | 4.266806507  | 1.982915-05 | 0.000489833 |
| ATP6AP1    | 10254.46201 | 0.43375967   | 0.101700339  | 4.265075943  | 1.998345-05 | 0.000493005 |
| PSMG3      | 1699.655608 | 0.733223404  | 0.171929557  | 4.264673362  | 2.001955-05 | 0.000493234 |
| IFTM8      | 27511.47922 | 1.063697878  | 0.249591254  | 4.261759234  | 2.028245-05 | 0.000499044 |
| MICAL3     | 7026.844246 | -0.660181788 | 0.154974214  | -4.259946046 | 2.044765-05 | 0.000502439 |
| MRPL12     | 2798.780607 | 0.756274658  | 0.177571322  | 4.258947811  | 2.053915-05 | 0.000504016 |
| COX5Y      | 2932.370344 | 0.452044993  | 0.106174618  | 4.257561656  | 2.056695-05 | 0.000505803 |
| GLEC3A     | 712.8004942 | 1.50521916   | 0.353530581  | 4.257677285  | 2.065625-05 | 0.000505803 |
| RIMBP3C    | 207.4867623 | 1.98945289   | 0.466644265  | 4.255801532  | 2.083015-05 | 0.000509122 |
| GADD45GIP1 | 5202.188301 | 0.941017227  | 0.221184495  | 4.254444805  | 2.095685-05 | 0.000510864 |
| ICAM2      | 1128.207356 | 1.06953637   | 0.250536278  | 4.254687762  | 2.093415-05 | 0.000510864 |
| VP52       | 3504.009167 | -0.299159534 | 0.070370827  | -4.251186872 | 2.126415-05 | 0.000516513 |
| PI4KA      | 2389.708297 | 0.50391712   | 0.118546166  | 4.250801912  | 2.130065-05 | 0.000516513 |
| MVL128     | 11373.70716 | 0.679428055  | 0.159824444  | 4.251089734  | 2.127335-05 | 0.000516513 |
| GNLY       | 399.3985676 | 1.46979921   | 0.34570802   | 4.251562371  | 2.122845-05 | 0.000516513 |
| HDGF       | 2532.801316 | 1.180370801  | 0.277817831  | 4.248722252  | 2.149935-05 | 0.000519862 |
| CARD6      | 771.8997144 | 1.266443037  | 0.298107523  | 4.248946008  | 2.147785-05 | 0.000519862 |
| BALG5      | 13522.62907 | -0.395491378 | 0.093114615  | -4.247360887 | 2.163035-05 | 0.000522445 |
| APRT       | 2920.634918 | 0.77096253   | 0.181515208  | 4.247061563  | 2.165925-05 | 0.000523458 |
| SAT2       | 4941.9961   | 0.726724092  | 0.171252398  | 4.243588843  | 2.199735-05 | 0.000529992 |
| ARHGAP24   | 649.3535883 | 0.93799139   | 0.221121278  | 4.240030855  | 2.234895-05 | 0.000537687 |
| MARCO      | 781.1545789 | 2.154328112  | 0.508180578  | 4.239296476  | 2.242215-05 | 0.000538745 |
| CD3        | 44785.70521 | 0.90290083   | 0.21309766   | 4.238855003  | 2.246635-05 | 0.000539103 |
| CD6        | 704.4551079 | 1.594713566  | 0.376420042  | 4.236526718  | 2.270045-05 | 0.000544012 |
| TPD2       | 2213.441279 | 0.508920513  | 0.120151671  | 4.23565074   | 2.278915-05 | 0.000545428 |
| LSMD10     | 1981.852804 | 0.522664     | 0.123426959  | 4.234601624  | 2.289575-05 | 0.00054727  |
| CDPR4      | 25.19468387 | -2.370711474 | 0.559966077  | -4.233669809 | 2.299085-05 | 0.000548442 |
| FAH        | 1655.765382 | 0.659623826  | 0.155809094  | 4.233538688  | 2.300435-05 | 0.000548442 |
| UBD        | 1791.920208 | 2.07805444   | 0.490810426  | 4.231380005  | 2.322625-05 | 0.000553017 |
| MRPL23     | 2416.389788 | 1.056380667  | 0.249715234  | 4.230341372  | 2.333375-05 | 0.000554145 |
| PPID       | 1346.122124 | 0.33837031   | 0.0799882714 | 4.230542997  | 2.331285-05 | 0.000554145 |
| CD9A       | 37.23555489 | 1.583719569  | 0.374542572  | 4.228410028  | 2.353495-05 | 0.000558203 |
| BRK1       | 6741.896087 | 0.386545594  | 0.091422811  | 4.228108695  | 2.356645-05 | 0.000558233 |
| B3GALT6    | 2107.148721 | 0.629910411  | 0.14901914   | 4.227043055  | 2.367875-05 | 0.000560161 |
| FST        | 228.6620542 | 1.68734667   | 0.399484949  | 4.223805861  | 2.402115-05 | 0.00056537  |
| MRPS24     | 2721.845501 | 0.657499805  | 0.155662616  | 4.223877397  | 2.401355-05 | 0.00056537  |
| TMEM115    | 8166.319172 | 0.64091323   | 0.151735607  | 4.223881557  | 2.401315-05 | 0.00056537  |
| LYPE3      | 77.11453572 | 1.324007278  | 0.313407842  | 4.224550577  | 2.394185-05 | 0.00056537  |
| DDX5       | 25529.20168 | -0.394834654 | 0.093510587  | -4.222334363 | 2.417855-05 | 0.000568349 |
| GPA74      | 5063.172094 | 0.450889556  | 0.106812523  | 4.221318272  | 2.428785-05 | 0.00057019  |
| FAMP20     | 4012.206519 | 0.791888609  | 0.187756157  | 4.217643885  | 2.468885-05 | 0.000578821 |
| PXK        | 4676.675517 | -0.933600004 | 0.221387882  | -4.21703872  | 2.475315-05 | 0.000579526 |
| ARPC4      | 9204.237324 | 0.567851889  | 0.134682557  | 4.216224425  | 2.484275-05 | 0.000579526 |
| SLC22A18AS | 41.7956089  | 1.393110491  | 0.330450508  | 4.216466415  | 2.481615-05 | 0.000579526 |
| NDJF55     | 8022.224836 | 0.719973548  | 0.170749861  | 4.216539579  | 2.480855-05 | 0.000579526 |
| PPAN       | 1469.912077 | 0.715847779  | 0.169888968  | 4.213780239  | 2.511325-05 | 0.000585095 |
| CRACR2B    | 574.6072469 | 1.036779127  | 0.246092309  | 4.212968417  | 2.520365-05 | 0.000588462 |
| HSPA4      | 5301.680584 | 0.260811129  | 0.061934538  | 4.211077298  | 2.541565-05 | 0.000590648 |
| SENW3      | 3189.488189 | 0.61344414   | 0.145203956  | 4.210244307  | 2.550955-05 | 0.000593083 |
| SOLG1      | 291.4549324 | 1.372631309  | 0.326153785  | 4.208540169  | 2.570265-05 | 0.000595815 |
| GNB2       | 12844.60003 | 0.629861212  | 0.149679918  | 4.208054232  | 2.575795-05 | 0.000599647 |
| SENPF      | 871.5866189 | -0.799237453 | 0.190051145  | -4.205380887 | 2.606435-05 | 0.000602208 |
| SLC39A2    | 16.86210572 | 1.645970089  | 0.39140597   | 4.205275892  | 2.607645-05 | 0.000602208 |
| ALG1       | 1451.334829 | 0.513677803  | 0.122185852  | 4.204096431  | 2.621585-05 | 0.000604671 |
| MO3A       | 3321.124989 | 0.647251884  | 0.153999499  | 4.202947882  | 2.634615-05 | 0.000606916 |
| ITPA       | 2409.551913 | 0.40633433   | 0.152449363  | 4.202270328  | 2.642515-05 | 0.000607976 |
| SIGLEC5    | 191.129143  | 1.585497849  | 0.377412279  | 4.200970494  | 2.657735-05 | 0.000610715 |
| MCAT       | 789.5983148 | 0.652294544  | 0.155283458  | 4.200669867  | 2.661265-05 | 0.000610765 |
| MRPL27     | 2804.954547 | 0.811825215  | 0.193285768  | 4.200129289  | 2.667635-05 | 0.000611464 |
| RIPK2      | 899.0533077 | 0.710355798  | 0.16920074   | 4.198301966  | 2.689245-05 | 0.000615652 |
| ITIC2      | 428.1296147 | -0.484263462 | 0.115434222  | -4.195146418 | 2.726955-05 | 0.000623512 |
| VBT1       | 9761.795532 | 0.71296707   | 0.169998888  | 4.194000261  | 2.740775-05 | 0.000625119 |
| RHB34      | 2518.171235 | 0.564018902  | 0.134417573  | 4.194148355  | 2.738995-05 | 0.000626119 |
| GPS3       | 247.8577407 | 1.131231924  | 0.26976725   | 4.193362     |             |             |

|              |             |              |             |              |             |             |
|--------------|-------------|--------------|-------------|--------------|-------------|-------------|
| IFCAT3       | 1595.5077   | 0.61569263   | 0.146951118 | 4.189795389  | 2.79205E-05 | 0.000632899 |
| RU15P3       | 5972.40660  | 0.501025434  | 0.119676903 | 4.189985044  | 2.78971E-05 | 0.000632899 |
| BIMV1        | 2748.40185  | 0.848258003  | 0.202499161 | 4.188945769  | 2.80251E-05 | 0.000634495 |
| CL10P98      | 2271.06649  | 0.823209424  | 0.196556809 | 4.188150116  | 2.81237E-05 | 0.000635942 |
| RAB32        | 1245.294185 | 1.006342072  | 0.240365567 | 4.186714782  | 2.83021E-05 | 0.000639191 |
| TACO1        | 1158.215378 | 0.553742719  | 0.1323098   | 4.185198071  | 2.84918E-05 | 0.0006419   |
| RNF25        | 1777.596221 | 0.581188739  | 0.138860445 | 4.185416065  | 2.84644E-05 | 0.0006419   |
| RRP9         | 1187.782584 | 0.710738311  | 0.169927774 | 4.182590617  | 2.88206E-05 | 0.000648516 |
| POGZ         | 4353.800652 | -0.572815519 | 0.136985158 | -4.181588199 | 2.8948E-05  | 0.000650588 |
| KDMC         | 1022.951452 | -0.59662433  | 0.14271323  | -4.180848772 | 2.90423E-05 | 0.000651913 |
| EIF4E2       | 2735.092133 | 0.282138092  | 0.067518254 | 4.178693529  | 2.93188E-05 | 0.00065372  |
| NRPS16       | 2786.553516 | 0.416851467  | 0.099775146 | 4.177908978  | 2.94201E-05 | 0.00065879  |
| HKBP         | 862.3345479 | 1.035039756  | 0.247888673 | 4.175421743  | 2.97434E-05 | 0.000665221 |
| CSAR2        | 349.117954  | 0.977614615  | 0.234164786 | 4.174900719  | 2.98117E-05 | 0.000665938 |
| ATK          | 17624.14407 | -0.959667751 | 0.229884783 | -4.174559703 | 2.98563E-05 | 0.000666178 |
| WMDX1        | 10602.26637 | 1.32582708   | 0.31771215  | 4.173044956  | 3.00556E-05 | 0.000669763 |
| ZFYE1        | 1552.458922 | 0.308000083  | 0.07284605  | 4.170847873  | 3.03482E-05 | 0.000675467 |
| RRP5         | 1686.202603 | 0.497549225  | 0.119306508 | 4.170344656  | 3.04139E-05 | 0.000676114 |
| NTSDC1       | 1951.239351 | -0.69676471  | 0.167090797 | -4.169976577 | 3.04631E-05 | 0.000676391 |
| PGRW2C       | 2490.314406 | 0.32011407   | 0.076774536 | 4.169534399  | 3.05223E-05 | 0.000676889 |
| G.R.W.D1     | 1570.067388 | 0.567641885  | 0.136182003 | 4.168258365  | 3.06936E-05 | 0.00067987  |
| SAR1A        | 4562.170557 | 0.346394772  | 0.083110767 | 4.167868786  | 3.07461E-05 | 0.000680216 |
| AKR1D1       | 10.81417221 | 2.08785038   | 0.501121154 | 4.16635846   | 3.09040E-05 | 0.000683915 |
| CEMP         | 420.827382  | -1.043943605 | 0.250586358 | -4.166003346 | 3.09986E-05 | 0.00068416  |
| CDC26        | 867.980282  | 0.554872398  | 0.133251542 | 4.164097375  | 3.12587E-05 | 0.000689074 |
| RPL36A       | 6941.31163  | 0.765918541  | 0.183977632 | 4.163106856  | 3.13946E-05 | 0.000691245 |
| FFAR2        | 42.35413393 | 1.507121698  | 0.36207881  | 4.162413419  | 3.14902E-05 | 0.000692523 |
| RAB5F        | 3198.93161  | 0.642473701  | 0.154363294 | 4.16208885   | 3.15356E-05 | 0.000693679 |
| NRPS10       | 1410.20452  | 0.33739701   | 0.081070123 | 4.161086476  | 3.16737E-05 | 0.000694899 |
| FAM7I2       | 284.740542  | -0.67622725  | 0.162643408 | -4.160184608 | 3.17995E-05 | 0.000696819 |
| PSM8         | 5438.457513 | 0.794164295  | 0.190942951 | 4.159171295  | 3.19404E-05 | 0.000699086 |
| CSF2B        | 653.99551   | 1.326830897  | 0.319081683 | 4.158279735  | 3.20651E-05 | 0.000700987 |
| CA3          | 720.6862354 | -2.09410222  | 0.503702828 | -4.157416043 | 3.21868E-05 | 0.000702808 |
| G.PSM2       | 2474.039669 | -0.746883817 | 0.179692532 | -4.15645406  | 3.23225E-05 | 0.000704936 |
| TOR1A        | 2109.294614 | 0.50176909   | 0.120844125 | 4.152200941  | 3.29293E-05 | 0.000717321 |
| MRP10        | 27.7697041  | 1.97495882   | 0.475678566 | 4.151876837  | 3.2976E-05  | 0.00071749  |
| NRGP         | 968.5611207 | 0.479076142  | 0.115398414 | 4.151496765  | 3.30308E-05 | 0.000717833 |
| CREB3        | 3060.25086  | 0.471372508  | 0.113582955 | 4.150028558  | 3.32434E-05 | 0.000720756 |
| PRK2         | 1337.915654 | 0.631644501  | 0.152201913 | 4.150043775  | 3.32412E-05 | 0.000720756 |
| SN.A1        | 294.9961408 | 0.971817506  | 0.234190407 | 4.149689637  | 3.32926E-05 | 0.000720975 |
| HRG.A1       | 5996.978285 | 0.988284973  | 0.233392846 | 4.148734584  | 3.34318E-05 | 0.000722293 |
| AP0C1        | 24459.16064 | 1.473520521  | 0.355161370 | 4.148876062  | 3.34117E-05 | 0.000722293 |
| ALDH1B1      | 926.092038  | 0.73759064   | 0.177816138 | 4.148943078  | 3.35129E-05 | 0.000727782 |
| RDK5         | 3127.542722 | 0.591918575  | 0.142692024 | 4.148224666  | 3.35644E-05 | 0.000727782 |
| PXN1L        | 48.19707377 | -1.237626427 | 0.298606216 | -4.144677369 | 3.40292E-05 | 0.000731263 |
| LEN.G        | 262.2203554 | 0.711790893  | 0.171821634 | 4.142615078  | 3.43368E-05 | 0.000738381 |
| COCL2        | 472.3709174 | 1.496718024  | 0.361543167 | 4.139804488  | 3.47602E-05 | 0.000746615 |
| ZN.F652      | 2648.626208 | -0.657566916 | 0.158909106 | -4.138006508 | 3.50336E-05 | 0.000750738 |
| CITFD4       | 1301.411748 | 1.158687501  | 0.279987955 | 4.138199866  | 3.50041E-05 | 0.000750738 |
| DN.MBP       | 704.689204  | 0.539563063  | 0.135238798 | 4.137592708  | 3.50969E-05 | 0.00075122  |
| RRP30        | 905.1000165 | 0.325790439  | 0.078766058 | 4.136178055  | 3.53138E-05 | 0.000754987 |
| SPN51        | 2801.622407 | 0.584194961  | 0.141361002 | 4.132645868  | 3.58611E-05 | 0.000764912 |
| ACP2         | 3262.958816 | 0.586489768  | 0.141912694 | 4.132750566  | 3.58448E-05 | 0.000764912 |
| S100A16      | 7953.293671 | 0.941240537  | 0.227836879 | 4.131203609  | 3.60869E-05 | 0.000768838 |
| PSM4         | 742.8186359 | 0.602838519  | 0.145956533 | 4.130260603  | 3.62352E-05 | 0.000771107 |
| ERG1C3       | 7563.737938 | 0.562456089  | 0.136217915 | 4.129090421  | 3.64201E-05 | 0.000774148 |
| CD74         | 329.6578913 | 1.358581705  | 0.304926863 | 4.127361024  | 3.65955E-05 | 0.000779123 |
| EB2          | 4993.203652 | 0.501034489  | 0.121427016 | 4.1262192    | 3.68776E-05 | 0.000782868 |
| ZBTB47       | 6127.041602 | -0.688144437 | 0.161944022 | -4.125761658 | 3.6951E-05  | 0.000782724 |
| PSAP         | 122041.2125 | 0.687347931  | 0.166654448 | 4.124389924  | 3.71719E-05 | 0.000783799 |
| LSMBTL2      | 2183.199501 | 0.400530257  | 0.097111577 | 4.124433674  | 3.71648E-05 | 0.000783799 |
| KRTAP3-1     | 7.471319944 | 3.634377111  | 0.881107811 | 4.124781401  | 3.71087E-05 | 0.000783799 |
| SLAMF9       | 39.56248106 | 1.673814169  | 0.405782412 | 4.124905667  | 3.70887E-05 | 0.000783799 |
| FCGR3B       | 243.446769  | 1.613489236  | 0.391317959 | 4.123217961  | 3.73616E-05 | 0.00078421  |
| AP0C4        | 44.20257674 | 1.945923914  | 0.471919534 | 4.123423114  | 3.73283E-05 | 0.00078421  |
| LAMB2        | 9183.615791 | 0.724560601  | 0.175716855 | 4.123455314  | 3.73231E-05 | 0.00078421  |
| UBA2         | 23734.88824 | 0.72408052   | 0.175889569 | 4.123710337  | 3.72818E-05 | 0.00078421  |
| CL20A9       | 3029.073678 | 0.426845121  | 0.103540745 | 4.122484557  | 3.74808E-05 | 0.000785817 |
| B5G          | 29470.94434 | 0.649588331  | 0.157596622 | 4.121813174  | 3.75902E-05 | 0.000787216 |
| PSM2         | 4708.634783 | 0.902824972  | 0.219059804 | 4.121386777  | 3.76631E-05 | 0.000787848 |
| UBAP1L       | 1116.564576 | 0.794042773  | 0.130807728 | 4.118323398  | 3.81639E-05 | 0.000795071 |
| TOP1MT       | 744.6473727 | 0.705546057  | 0.17132306  | 4.118222026  | 3.8181E-05  | 0.000795071 |
| RPS10-N.U.D3 | 500.2517757 | 1.245431768  | 0.302411837 | 4.118332811  | 3.81623E-05 | 0.000795071 |
| PSM3         | 5764.383609 | 0.529574228  | 0.12857273  | 4.11886896   | 3.80737E-05 | 0.000795071 |
| G.ARI        | 661.6271628 | 0.675875805  | 0.164180439 | 4.116664617  | 3.84395E-05 | 0.000798648 |
| THP7         | 2125.451344 | 0.607894021  | 0.147665005 | 4.116708462  | 3.84322E-05 | 0.000798648 |
| KEL          | 366.2882713 | -1.089327776 | 0.264092412 | -4.115728911 | 3.85958E-05 | 0.000800993 |
| ACRPB        | 240.6112249 | 1.011936144  | 0.245945336 | 4.114472492  | 3.88066E-05 | 0.000804462 |
| LON.BF3      | 128.2949804 | 0.99391702   | 0.241708859 | 4.112042165  | 3.92175E-05 | 0.000812066 |
| SCFD2        | 721.2089881 | -0.78698471  | 0.191460179 | -4.110435464 | 3.94914E-05 | 0.00081682  |
| TSSC4        | 2477.218026 | 0.752137115  | 0.183039597 | 4.109231186  | 3.96979E-05 | 0.00082017  |
| G.PRCS.A     | 671.8169098 | 1.348514709  | 0.328323858 | 4.107157345  | 4.00558E-05 | 0.000826639 |
| YARS2        | 412.0450887 | 0.488881187  | 0.119082468 | 4.105400277  | 4.03615E-05 | 0.000830871 |
| KRTX1        | 3.00331774  | 3.634312164  | 0.885248937 | 4.105412633  | 4.03944E-05 | 0.000831087 |
| HBD          | 35.0920886  | 2.716026641  | 0.661677873 | 4.104756638  | 4.07411E-05 | 0.000833474 |
| TLR4         | 2897.089947 | 0.83716307   | 0.203963346 | 4.104478025  | 4.05229E-05 | 0.000832549 |
| MYEOV        | 17.57037023 | 1.737156489  | 0.423547658 | 4.101442783  | 4.10582E-05 | 0.000840868 |
| PTX3         | 9.919636773 | 2.332150954  | 0.56874233  | 4.100541213  | 4.11785E-05 | 0.000844956 |
| CFD          | 2888.023796 | 1.601110947  | 0.390554551 | 4.099615928  | 4.13836E-05 | 0.000847399 |
| AURKAP1      | 5696.341798 | 0.749311108  | 0.182822907 | 4.098562325  | 4.15724E-05 | 0.00085032  |
| CCDC134      | 116.5785317 | 0.702333414  | 0.171415787 | 4.097250465  | 4.18086E-05 | 0.000852314 |
| UNC119B      | 2475.751817 | 0.398888832  | 0.097353981 | 4.097303767  | 4.1799E-05  | 0.000852314 |
| TMEM38       | 3411.903993 | 0.60374593   | 0.147343063 | 4.097552446  | 4.17542E-05 | 0.000852314 |
| ZNHT2        | 723.796573  | 0.791948729  | 0.193317267 | 4.096262662  | 4.19214E-05 | 0.000853667 |
| TM5F1        | 2347.011352 | 0.952468197  | 0.232530113 | 4.096106886  | 4.20156E-05 | 0.000854642 |
| PSM8B        | 7379.428744 | 0.486120814  | 0.118719708 | 4.094693464  | 4.22727E-05 | 0.000858924 |
| EPH4         | 9.927362598 | 2.428516128  | 0.593247438 | 4.093597328  | 4.24732E-05 | 0.000861098 |
| TCH1         | 77.7839069  | 1.275380483  | 0.311536949 | 4.093819802  | 4.24288E-05 | 0.000861098 |
| SY1          | 2099.752344 | 0.402742764  | 0.098390978 | 4.093289718  | 4.25296E-05 | 0.000861294 |
| P2RX1        | 124.5511278 | 1.369430607  | 0.334740125 | 4.091026413  | 4.29468E-05 | 0.000868789 |
| NTM1         | 1709.75864  | 0.587129685  | 0.143561188 | 4.089753464  | 4.31832E-05 | 0.000872613 |
| ALEXE3       | 60.09102773 | 1.789612771  | 0.437656848 | 4.089077507  | 4.33092E-05 | 0.000873245 |
| EXOSC6       | 2233.143127 | 0.365126252  | 0.089288292 | 4.089295973  | 4.32684E-05 | 0.000873245 |
| F.BW.5       | 6997.694072 | 0.536540123  | 0.131309692 | 4.086066427  | 4.38748E-05 | 0.000883682 |
| SMM12        | 2069.554798 | 0.570412211  | 0.139665106 | 4.084142601  | 4.42399E-05 | 0.000890062 |
| OSBP.L5      | 1237.650023 | -0.340611818 | 0.083446105 | -4.081818055 | 4.46848E-05 | 0.000898023 |
| CHD1         | 3634.175548 | 0.56997656   | 0.139648119 | 4.081519785  | 4.47422E-05 | 0.000898206 |
| MEF1         | 2154.172088 | 0.323538624  | 0.079310985 | 4.079367117  | 4.51585E-05 | 0.000905577 |
| EIF3B        | 7297.762564 | 0.621450891  | 0.152444796 | 4.076563506  | 4.57062E-05 | 0.000915564 |
| ZDHC7        | 2580.037902 | 0.412495498  | 0.101195029 | 4.076242866  | 4.57692E-05 | 0.000915832 |
| STK11        | 4069.512215 | 0.570878563  | 0.14009128  | 4.075047099  | 4.6005E-05  | 0.000919552 |
| KLH.30       | 54.3245122  | 1.547941163  | 0.379887993 | 4.074730428  | 4.60677E-05 | 0.000919806 |
| BDX17        | 26132.84423 | 0.512989027  | 0.130621238 | 4.074144189  | 4.61839E-05 | 0.000920123 |
| RPS19B.1     | 5537.374319 | 0.764980608  | 0.187761107 | 4.0742213    |             |             |

|           |             |              |             |              |             |             |
|-----------|-------------|--------------|-------------|--------------|-------------|-------------|
| CERCAM    | 41925.12761 | -1.031013631 | 0.253404181 | -4.068651799 | 4.728576-05 | 0.000938439 |
| RPLP1     | 47338.13939 | 0.821441129  | 0.201900134 | 4.068551655  | 4.730631-05 | 0.000938439 |
| OSCAM1    | 1436.62383  | -0.892272051 | 0.220562791 | -4.067898524 | 4.743916-05 | 0.000939048 |
| KRTCAP2   | 4685.63360  | 0.784102538  | 0.192746193 | 4.068057187  | 4.740676-05 | 0.000939048 |
| KCNH8     | 1846.69577  | -1.344686373 | 0.330632395 | -4.067013236 | 4.761955-05 | 0.000940601 |
| TPST2     | 1618.81675  | 0.511980794  | 0.125882682 | 4.067126517  | 4.759646-05 | 0.000940601 |
| FFGS      | 2613.28894  | 0.57028292   | 0.140288193 | 4.065081371  | 4.801576-05 | 0.000947411 |
| WVRN      | 2767.81774  | -0.694499438 | 0.170897929 | -4.063825945 | 4.827486-05 | 0.000951509 |
| AGAP4     | 668.785561  | -0.670975762 | 0.165171477 | -4.06229802  | 4.859215-05 | 0.000956733 |
| TMEM158   | 2106.209581 | 1.245441524  | 0.306669337 | 4.06211678   | 4.881726-05 | 0.000960141 |
| CECR2     | 1069.16008  | -0.992721604 | 0.244461121 | -4.060856792 | 4.889316-05 | 0.000960606 |
| RHB03     | 1860.998139 | 0.586219531  | 0.144394612 | 4.059843535  | 4.910566-05 | 0.000963756 |
| ZCH21A    | 445.7249198 | 1.210149702  | 0.298167997 | 4.058617551  | 4.936411-05 | 0.000967799 |
| ZNF76     | 1905.04702  | -0.245369963 | 0.060491213 | -4.056290974 | 4.985816-05 | 0.00097567  |
| CEBPB     | 4168.408139 | 0.946846403  | 0.234303737 | 4.056232861  | 4.987146-05 | 0.00097567  |
| SH2D6     | 257.9364772 | 0.885629597  | 0.218380708 | 4.055422167  | 5.004386-05 | 0.000978004 |
| CDP58     | 3682.736632 | 0.248724871  | 0.061347969 | 4.054249222  | 5.027836-05 | 0.000981546 |
| ATP6V0C   | 18940.77178 | 0.65532241   | 0.161644616 | 4.054043485  | 5.033996-05 | 0.000981701 |
| SLU7      | 2832.395756 | 0.258164428  | 0.063688765 | 4.053531683  | 5.045026-05 | 0.000982818 |
| IFT80     | 2342.238394 | -0.826827338 | 0.204062655 | -4.051830839 | 5.081846-05 | 0.000986683 |
| PLXNB3    | 14055.30359 | -0.78965783  | 0.194895611 | -4.051696321 | 5.084766-05 | 0.000986683 |
| MAN2A2    | 10870.15281 | -0.628056682 | 0.155019337 | -4.051473142 | 5.089626-05 | 0.000986683 |
| THO5      | 1023.788307 | 0.714834768  | 0.176442258 | 4.051380759  | 5.091636-05 | 0.000986683 |
| HK1       | 433.1122903 | 0.937849093  | 0.231454378 | 4.051982519  | 5.078556-05 | 0.000986683 |
| TRPV6     | 301.9301748 | -1.61639784  | 0.399081612 | -4.050293957 | 5.115336-05 | 0.000989197 |
| RPS27L    | 4585.829893 | 0.898316496  | 0.221785229 | 4.050389198  | 5.113256-05 | 0.000989197 |
| CIOTNF3   | 614.4024612 | -0.690473473 | 0.170534627 | -4.048875503 | 5.146436-05 | 0.000994167 |
| ATP18B    | 4229.00513  | 0.525397372  | 0.129851329 | 4.046145580  | 5.206796-05 | 0.001004773 |
| ETV5      | 30.69218567 | 2.511084403  | 0.620721139 | 4.045430016  | 5.222776-05 | 0.001005737 |
| PTRH4     | 821.3057801 | 0.712324885  | 0.176076767 | 4.045535208  | 5.220366-05 | 0.001005737 |
| CDL51     | 7103.243579 | 0.932050492  | 0.230434092 | 4.044549715  | 5.242386-05 | 0.001008474 |
| AP5T1     | 3375.561113 | 0.535121877  | 0.132529131 | 4.043870557  | 5.257666-05 | 0.001010346 |
| TAN1      | 2295.255012 | -0.760070149 | 0.187985062 | -4.043247595 | 5.271596-05 | 0.001010945 |
| DNH01     | 1121.294257 | -0.806535259 | 0.199477288 | -4.043243545 | 5.271686-05 | 0.001010945 |
| CD9       | 22984.48871 | 0.563023193  | 0.139301801 | 4.041750883  | 5.305366-05 | 0.001016345 |
| ZNF862    | 1782.480817 | -0.397365711 | 0.098379744 | -4.039100868 | 5.365656-05 | 0.001026828 |
| ZPRL      | 2239.286704 | 0.398711741  | 0.098721937 | 4.038734985  | 5.374026-05 | 0.001027364 |
| TNDC11    | 1617.219703 | 0.393278859  | 0.09746398  | 4.03513999   | 5.456986-05 | 0.001042141 |
| PLEKH7    | 932.7759273 | -0.663731404 | 0.164548394 | -4.033654718 | 5.491616-05 | 0.001047668 |
| CCT8      | 4429.609313 | 0.388224807  | 0.096406187 | 4.026959853  | 5.650036-05 | 0.001075665 |
| AC09850.2 | 53.44120288 | 1.699905262  | 0.422125912 | 4.027009988  | 5.649066-05 | 0.001075665 |
| TRIM2     | 1043.414107 | -0.553969873 | 0.137583045 | -4.026419973 | 5.662776-05 | 0.001076978 |
| BCL7C     | 3451.948218 | 0.831013122  | 0.206908769 | 4.025993111  | 5.673531-05 | 0.001077912 |
| ESPN      | 160.5297139 | 1.463653891  | 0.363665872 | 4.024721607  | 5.704286-05 | 0.001082637 |
| NDUFC2    | 5764.529403 | 0.475904733  | 0.118262782 | 4.02412936   | 5.718656-05 | 0.001084245 |
| HEXIM2    | 457.9702133 | 0.599510778  | 0.149002997 | 4.023481347  | 5.734416-05 | 0.001086812 |
| WASH1     | 6665.181411 | -0.540456302 | 0.134338787 | -4.023084562 | 5.740996-05 | 0.001086833 |
| NHLRC4    | 37.11987697 | -0.978535924 | 0.243402453 | -4.020238543 | 5.813926-05 | 0.001098921 |
| ZNF830    | 715.5541654 | 0.36393052   | 0.090602422 | 4.01678578   | 5.899736-05 | 0.001113397 |
| RAB1F     | 963.1565847 | 0.330570224  | 0.082344767 | 4.014465463  | 5.958076-05 | 0.001123861 |
| Clorf127  | 78.73466865 | 1.416629798  | 0.352990308 | 4.013225766  | 5.989466-05 | 0.001128627 |
| ELOB      | 13485.26042 | 0.881031799  | 0.219554399 | 4.012817805  | 5.999826-05 | 0.001129423 |
| VW1       | 236.1190804 | 1.238454826  | 0.308675117 | 4.012162817  | 6.016566-05 | 0.001131409 |
| MRPL37    | 2815.170227 | 0.531709017  | 0.132534988 | 4.011823445  | 6.025166-05 | 0.001131882 |
| MRP56     | 1970.533537 | 0.483538048  | 0.120585842 | 4.010815326  | 6.050946-05 | 0.001135568 |
| ACPE      | 1505.953111 | 0.617205262  | 0.15389946  | 4.010427079  | 6.060967-05 | 0.00113628  |
| TMEM203   | 1811.458685 | 0.373489594  | 0.09289819  | 4.009564393  | 6.080776-05 | 0.001138844 |
| BSC2      | 571.3258330 | 0.808966446  | 0.201793759 | 4.008877435  | 6.100816-05 | 0.001144439 |
| PZRO4     | 1800.44092  | 0.72874732   | 0.181781956 | 4.006852969  | 6.153316-05 | 0.001147767 |
| PLAUR     | 2422.805418 | 1.246965765  | 0.311198064 | 4.006984331  | 6.148996-05 | 0.001147767 |
| PSMC1     | 4605.517444 | 0.456927177  | 0.114022976 | 4.007325557  | 6.141026-05 | 0.001147767 |
| PCG11     | 650.1106214 | 0.486128084  | 0.121368892 | 4.0053763    | 6.191886-05 | 0.001153794 |
| CCDC9     | 1137.724407 | 0.468426014  | 0.116986414 | 4.004106029  | 6.225246-05 | 0.001158338 |
| SERPINB10 | 20.40257268 | 1.343125309  | 0.335488215 | 4.003494752  | 6.241366-05 | 0.001160666 |
| PHM       | 1383.647988 | 0.513414305  | 0.128257645 | 4.002991845  | 6.254656-05 | 0.001161964 |
| STAR09    | 2110.689871 | -0.865211386 | 0.216311835 | -3.999833784 | 6.33876-05  | 0.001173812 |
| DMPK3     | 3933.580256 | 0.750714915  | 0.187729041 | 3.998927985  | 6.363636-05 | 0.001173812 |
| MRPL55    | 2321.793077 | 0.663405925  | 0.165888982 | 3.999095761  | 6.35856-05  | 0.001173812 |
| SUGT      | 204.109399  | 1.026433541  | 0.256652541 | 3.999311817  | 6.352696-05 | 0.001173812 |
| OAZ1      | 7748.338    | 0.49748116   | 0.124383896 | 3.999562689  | 6.345966-05 | 0.001173812 |
| NDUFT14   | 1641.24372  | 0.772360312  | 0.193093678 | 3.99925431   | 6.336246-05 | 0.001173812 |
| GNP2      | 1618.536472 | 0.29357353   | 0.073387948 | 4.000296203  | 6.326326-05 | 0.001173812 |
| MRPL14    | 1288.209223 | 0.64015388   | 0.160111565 | 3.998172716  | 6.383446-05 | 0.00117521  |
| ABCF3     | 2895.359568 | 0.326301641  | 0.081607994 | 3.998402921  | 6.377136-05 | 0.00117521  |
| S100PB    | 1269.884164 | -0.324228281 | 0.081109741 | -3.997402502 | 6.404146-05 | 0.00117682  |
| L3MBTL1   | 986.4579888 | -0.710248179 | 0.177695759 | -3.996990046 | 6.415316-05 | 0.00117682  |
| FUT7      | 30.55040753 | 1.440030404  | 0.360286449 | 3.996904155  | 6.417836-05 | 0.00117682  |
| ZNF45     | 2652.503649 | 0.457073388  | 0.114351088 | 3.99710574   | 6.412176-05 | 0.00117682  |
| ZNF707    | 660.1738638 | 0.58744423   | 0.147018472 | 3.995922537  | 6.444286-05 | 0.00117023  |
| PBGV      | 795.4156874 | 0.447710459  | 0.11204177  | 3.995924555  | 6.444236-05 | 0.00117023  |
| RNF181    | 3958.490427 | 0.739626899  | 0.18508553  | 3.996070957  | 6.440246-05 | 0.00117023  |
| CRH       | 116.8564968 | 2.130275271  | 0.533045678 | 3.996421618  | 6.430726-05 | 0.00117023  |
| SH2D2A    | 129.9801239 | 1.273421617  | 0.318697673 | 3.995454862  | 6.457026-05 | 0.001178182 |
| HACT5     | 2031.046679 | 0.465066472  | 0.116410719 | 3.995048338  | 6.468116-05 | 0.001179037 |
| IPPY      | 7134727109  | 2.549087503  | 0.638253969 | 3.991851381  | 6.500866-05 | 0.001183838 |
| SPD       | 565.7672024 | -1.379116576 | 0.345429218 | -3.992472277 | 6.53886-05  | 0.001189573 |
| ALDH8B1   | 1708.992561 | 0.844446063  | 0.211540014 | 3.991897562  | 6.554676-05 | 0.001191282 |
| SMIM29    | 4481.141203 | 0.601474596  | 0.150695744 | 3.991317731  | 6.570726-05 | 0.001191848 |
| EID3B     | 411.296362  | 0.612094854  | 0.153349669 | 3.991497726  | 6.565736-05 | 0.001191848 |
| TNFRSF12A | 3632.263731 | 1.319198549  | 0.330544574 | 3.990985336  | 6.579936-05 | 0.001193346 |
| TTL5      | 1288.140699 | -0.527619048 | 0.132249934 | -3.989500262 | 6.619666-05 | 0.001196741 |
| IL10RB    | 1487.157234 | 0.671171358  | 0.168238073 | 3.989414214  | 6.623676-05 | 0.001196741 |
| PHETA1    | 675.6872222 | 0.537512755  | 0.134733231 | 3.989459385  | 6.622416-05 | 0.001196741 |
| MMU2      | 3504.608046 | -0.439411792 | 0.110179962 | -3.988127991 | 6.659676-05 | 0.001197377 |
| GGN       | 180.0433728 | 0.990274102  | 0.248296775 | 3.988286475  | 6.655736-05 | 0.001197377 |
| OPM2      | 2962.098722 | 0.696941333  | 0.167901882 | 3.988289624  | 6.655146-05 | 0.001197377 |
| MRP2A05   | 5210.25278  | 0.719344508  | 0.18036393  | 3.988294923  | 6.654996-05 | 0.001197377 |
| PRG2      | 14.2920142  | 2.266517543  | 0.568761524 | 3.988511357  | 6.648907-05 | 0.001197377 |
| ACEY      | 4677.617465 | 0.511518071  | 0.128451812 | 3.981787725  | 6.828646-05 | 0.001226559 |
| NSL1      | 1521.01261  | 0.287338969  | 0.072165411 | 3.981671619  | 6.843236-05 | 0.001226768 |
| MGAM      | 112.9874204 | 1.468509621  | 0.368806545 | 3.98178842   | 6.839876-05 | 0.001226768 |
| HERPUD1   | 4597.155748 | -0.395701183 | 0.099407385 | -3.980601515 | 6.874116-05 | 0.001231127 |
| MRPR      | 6304.024736 | 0.525591188  | 0.132070268 | 3.97963291   | 6.902186-05 | 0.001234953 |
| FMD1      | 12.30908521 | -1.801499139 | 0.452905003 | -3.977633434 | 6.959876-05 | 0.00123687  |
| TMEM102   | 184.7684039 | 0.926826932  | 0.23300099  | 3.977659879  | 6.959686-05 | 0.00123687  |
| STC2      | 673.0276788 | 1.711146911  | 0.43018774  | 3.977674746  | 6.959256-05 | 0.00123687  |
| RAE1      | 1503.933378 | 0.328380363  | 0.082548515 | 3.978028726  | 6.94896-05  | 0.00123687  |
| NDUFA4    | 1142.543731 | 0.559619971  | 0.140663508 | 3.978430351  | 6.937176-05 | 0.00123687  |
| PSTPIP1   | 598.9222363 | 0.922613731  | 0.231903949 | 3.978430447  | 6.937176-05 | 0.00123687  |
| MYO6F     | 3783.616556 | 0.692571988  | 0.174056222 | 3.979013148  | 6.920196-05 | 0.00123687  |
| ACOT9     | 1208.455572 | 0.494653435  | 0.124425212 | 3.975510998  | 7.022836-05 | 0.001246857 |
| HSR2      | 482.0115378 | 0.958744873  | 0.241300099 | 3.973246991  | 7.089956-05 | 0.001257563 |
| IL10      | 124.9785109 | 1.415800876  | 0.366741216 | 3.96955831   | 7.200586-05 | 0.001279977 |
| RLT7      | 1711.263792 | -0.479531609 | 0.120834412 | -3.96502533  |             |             |



|              |             |              |             |              |             |             |
|--------------|-------------|--------------|-------------|--------------|-------------|-------------|
| PSCA         | 44.84805437 | 1.23253120   | 0.31063472  | 1.968718807  | 7.22601E-05 | 0.001276719 |
| AMGO2        | 641.56664   | 0.93143220   | 0.23236908  | 1.96769705   | 7.25819E-05 | 0.001280011 |
| ATPV001      | 8919.17323  | 0.53143164   | 0.133963035 | 3.96700212   | 7.27823E-05 | 0.001281094 |
| LBZ          | 67.61960212 | 1.393421152  | 0.35123844  | 1.967165823  | 7.27324E-05 | 0.001281094 |
| CNTRL        | 912.3018296 | -0.564919307 | 0.142500252 | -3.964288922 | 7.36151E-05 | 0.001295515 |
| PCNA         | 4318.577346 | 0.991174092  | 0.250055937 | 3.963809474  | 7.37631E-05 | 0.001295882 |
| UROD         | 5471.585917 | 0.566422961  | 0.142923118 | 3.963128718  | 7.39739E-05 | 0.001298347 |
| ZNFS24       | 1184.197843 | 0.272620676  | 0.183681681 | 3.961313238  | 7.45387E-05 | 0.001307015 |
| TMEM147      | 4218.104809 | 0.562065788  | 0.141840814 | 3.959860252  | 7.49936E-05 | 0.001313743 |
| WDR59        | 2390.194819 | -0.283186815 | 0.071530995 | -3.958490297 | 7.5425E-05  | 0.001320004 |
| ACTR8        | 985.4904183 | 0.277010622  | 0.069882733 | 3.958270973  | 7.54943E-05 | 0.001320004 |
| EF4EP3       | 839.3035788 | 0.761903424  | 0.19250919  | 3.95775093   | 7.55885E-05 | 0.001321626 |
| FOX1         | 72.74697823 | 1.271242573  | 0.321231278 | 3.957414355  | 7.57654E-05 | 0.001322236 |
| PF4V1        | 9.254141129 | 2.555159957  | 0.645804028 | 3.95664290   | 7.61004E-05 | 0.001325256 |
| RAF          | 24456.18003 | 0.793319647  | 0.200515131 | 3.956407903  | 7.60853E-05 | 0.001325306 |
| PRR4         | 283.1516099 | -0.865228548 | 0.218756331 | -3.955216044 | 7.64655E-05 | 0.001329912 |
| SQOR         | 1723.192424 | 0.864792062  | 0.218650888 | 3.955127141  | 7.6494E-05  | 0.001329912 |
| PRDM2        | 159.0165983 | -0.711146522 | 0.179860572 | -1.953877784 | 7.68947E-05 | 0.00133562  |
| PSEN2        | 1143.901582 | 0.572680838  | 0.144869063 | 3.953092771  | 7.71475E-05 | 0.001338749 |
| SLC6A2       | 7.392239164 | -1.66326597  | 0.420900944 | -3.951680304 | 7.76044E-05 | 0.00134541  |
| FTSL1        | 1449.935176 | 0.334363833  | 0.084619394 | 3.951385123  | 7.77001E-05 | 0.001345804 |
| DG.UO.K      | 2302.438745 | 0.534297885  | 0.135233203 | 3.950937153  | 7.78458E-05 | 0.001347061 |
| CTTNBP2      | 1594.876371 | -0.875849096 | 0.221718722 | -3.950271255 | 7.80627E-05 | 0.001348282 |
| CTNND2       | 8.142851828 | 2.954611307  | 0.747916365 | 3.950456821  | 7.80022E-05 | 0.001348282 |
| WSP          | 2627.76679  | 0.78925694   | 0.199837862 | 3.94948651   | 7.8319E-05  | 0.001350179 |
| CAW1         | 2502.617046 | 0.750485484  | 0.190013646 | 3.949393939  | 7.82688E-05 | 0.001350179 |
| TMEM2        | 58.96680357 | 1.384700063  | 0.350677633 | 3.948640954  | 7.85961E-05 | 0.00135369  |
| PI15         | 69.1383554  | -0.920793702 | 0.233098754 | -3.948085058 | 7.87788E-05 | 0.001355569 |
| NACT1        | 2073.4705   | 0.599523994  | 0.153043857 | 3.945758717  | 7.95486E-05 | 0.001367539 |
| TMEM214      | 2823.524789 | 0.389529332  | 0.098732889 | 3.945292432  | 7.97026E-05 | 0.00136893  |
| MTX1         | 1836.60708  | 0.560233877  | 0.1420754   | 3.942215197  | 8.03965E-05 | 0.001374421 |
| BCKX         | 3020.473664 | 0.45246618   | 0.114739201 | 3.943431508  | 8.03299E-05 | 0.001374421 |
| HEGF         | 2169.585551 | 0.884573022  | 0.224311305 | 3.9435062    | 8.02989E-05 | 0.001374421 |
| NECTIN2      | 3141.014287 | 0.801646403  | 0.203277821 | 3.943599949  | 8.02675E-05 | 0.001374421 |
| NME2         | 11120.90617 | 0.62404245   | 0.158235064 | 3.943768423  | 8.02111E-05 | 0.001374421 |
| LRP10        | 10063.36884 | 0.727250101  | 0.18448473  | 3.942061229  | 8.07843E-05 | 0.001379773 |
| NPG          | 2210.1071   | 0.582670114  | 0.14786775  | 3.94048138   | 8.13183E-05 | 0.001387606 |
| CLPTM1       | 3487.994241 | 0.414319227  | 0.105170734 | 3.939491633  | 8.16544E-05 | 0.001390767 |
| SURF4        | 7892.046721 | 0.451489927  | 0.114601754 | 3.939642396  | 8.16032E-05 | 0.001390767 |
| ZNFB88       | 192.8625901 | 0.507535166  | 0.128859627 | 3.938667027  | 8.19355E-05 | 0.001391696 |
| P2RY6        | 388.8888717 | 1.25233777   | 0.3180012   | 3.938770588  | 8.19002E-05 | 0.001391696 |
| PPP1R3C      | 1520.389003 | 0.846931164  | 0.215021309 | 3.93883365   | 8.18787E-05 | 0.001391696 |
| SLAMF1       | 1737.67308  | 0.85681845   | 0.217689344 | 3.93777623   | 8.22398E-05 | 0.001394926 |
| GMFR         | 408.5491169 | 0.975963998  | 0.247867147 | 3.937447992  | 8.2328E-05  | 0.001394926 |
| PTK6         | 24.65236571 | 0.82003481   | 0.211304338 | 3.937466225  | 8.23469E-05 | 0.001394926 |
| NRP1         | 4355.693913 | 0.377389033  | 0.095858551 | 3.937047421  | 8.24903E-05 | 0.001395972 |
| NETT127      | 161.0972311 | 1.14331743   | 0.290427891 | 3.936665394  | 8.26217E-05 | 0.001396913 |
| DHXB         | 1672.747822 | 0.322667532  | 0.081964274 | 3.936437707  | 8.27001E-05 | 0.001396913 |
| POCLB        | 1194.938416 | -0.716247029 | 0.182052995 | -3.934277644 | 8.34473E-05 | 0.001406999 |
| TRIM25       | 2134.928983 | 0.628024371  | 0.15962586  | 3.934352312  | 8.34213E-05 | 0.001406999 |
| CCS          | 2755.0273   | 0.78881133   | 0.200608404 | 3.934056201  | 8.35242E-05 | 0.001407009 |
| NEK1         | 774.2785967 | -0.769816912 | 0.195737117 | -3.932912292 | 8.39229E-05 | 0.001412433 |
| SURF2        | 1243.736134 | 0.764592007  | 0.19447527  | 3.931564194  | 8.4995E-05  | 0.001419083 |
| ZNFB80       | 1040.057507 | -0.623824179 | 0.158801258 | -3.92832681  | 8.55368E-05 | 0.001435736 |
| PSMD4        | 7584.56346  | 0.558986721  | 0.142296617 | 3.928320528  | 8.55412E-05 | 0.001435736 |
| AMXD2        | 3321.80339  | 0.731834867  | 0.186400727 | 3.926137396  | 8.63209E-05 | 0.001447504 |
| MLT1         | 1438.973575 | 0.856208467  | 0.218162937 | 3.924623838  | 8.68637E-05 | 0.001453283 |
| SCHW2        | 1318.019092 | 0.537404058  | 0.136946402 | 3.924190877  | 8.70217E-05 | 0.001455608 |
| WDR1         | 8782.811899 | 0.724910714  | 0.184793205 | 3.922812558  | 8.75181E-05 | 0.001463585 |
| FADS1        | 3348.639543 | -0.60094314  | 0.153208387 | -3.922390623 | 8.76747E-05 | 0.001464879 |
| PPM1F        | 2559.620598 | 0.472123816  | 0.120379871 | 3.92194986   | 8.78353E-05 | 0.001466228 |
| GARS         | 4738.137199 | 0.521341074  | 0.132943821 | 3.921514141  | 8.79943E-05 | 0.001467554 |
| B3GN17       | 1167.136041 | 0.992682408  | 0.2532329   | 3.920037279  | 8.85353E-05 | 0.001475241 |
| SLC3A2       | 10679.48757 | 0.531013525  | 0.135505815 | 3.918750828  | 8.90091E-05 | 0.001481796 |
| CIB2         | 874.6609177 | 0.591541904  | 0.150971593 | 3.918233168  | 8.92004E-05 | 0.001483641 |
| IPK3         | 1082.076704 | -0.88397301  | 0.225629608 | -3.917805894 | 8.9386E-05  | 0.001484932 |
| TAL1         | 434.5808793 | -0.754808102 | 0.192324621 | -3.91737296  | 8.95176E-05 | 0.001486234 |
| UBE2Z        | 5302.953561 | 0.35062244   | 0.089544255 | 3.915632989  | 9.01673E-05 | 0.001495674 |
| CEL          | 264.3029189 | 1.046383327  | 0.267299167 | 3.914652411  | 9.05345E-05 | 0.001499066 |
| TAPP         | 8873.685382 | 0.698816343  | 0.178512543 | 3.914662416  | 9.05308E-05 | 0.001499066 |
| ZNFX11-PP4P1 | 12.99067791 | 3.29810003   | 0.842699916 | 3.913780105  | 9.08811E-05 | 0.001503108 |
| TGFS         | 40.1546547  | 1.417932995  | 0.362289358 | 3.913811345  | 9.08498E-05 | 0.001503108 |
| CTSK         | 746.1835902 | 0.869539914  | 0.222191403 | 3.913472351  | 9.09783E-05 | 0.001502365 |
| SUSD2        | 898.6236079 | 1.149233405  | 0.293748684 | 3.912301466  | 9.14207E-05 | 0.001508319 |
| ARMCS        | 1667.437112 | 0.688539896  | 0.176007865 | 3.911983694  | 9.15411E-05 | 0.001508954 |
| DRAXIN       | 934.6456117 | 1.131649567  | 0.289444735 | 3.909725868  | 9.24009E-05 | 0.001521766 |
| PAN K2       | 1634.243364 | 0.294251429  | 0.075265656 | 3.909504618  | 9.24856E-05 | 0.001521801 |
| RBM19        | 1620.701967 | -0.249155451 | 0.063739782 | -3.908947369 | 9.26992E-05 | 0.001523954 |
| G1E1         | 1536.655778 | 0.397754393  | 0.101762455 | 3.908655647  | 9.28111E-05 | 0.001524439 |
| CYTL1        | 219.9912151 | -0.756851855 | 0.193706303 | -3.907213361 | 9.33667E-05 | 0.001530832 |
| HLX          | 393.6142004 | 0.955047735  | 0.244423339 | 3.907350817  | 9.33136E-05 | 0.001530832 |
| TMEM208      | 2024.396681 | 0.574996997  | 0.147267713 | 3.901861426  | 9.54558E-05 | 0.001563693 |
| GSOX1        | 4387.126283 | 0.534827883  | 0.137131041 | 3.900122683  | 9.6144E-05  | 0.001565227 |
| WN14         | 115.5149639 | 1.006192299  | 0.257886991 | 3.900141097  | 9.61366E-05 | 0.001565227 |
| SLAMF8       | 1047.192913 | 1.128906779  | 0.340703813 | 3.900486568  | 9.59995E-05 | 0.001565227 |
| LILRB2       | 1150.9799   | 1.229915538  | 0.31530539  | 3.900712052  | 9.59102E-05 | 0.001565227 |
| LRRN4        | 1986.711328 | 0.519589405  | 0.133197325 | 3.900897733  | 9.58358E-05 | 0.001565227 |
| STK40        | 3781.774473 | 0.506651072  | 0.129879614 | 3.900283385  | 9.58245E-05 | 0.001565227 |
| TENTSC       | 154.2083981 | 1.051403983  | 0.269496826 | 3.901394236  | 9.5654E-05  | 0.001565227 |
| TNFAIP8      | 384.2060737 | 0.96064225   | 0.246348781 | 3.899521024  | 9.63832E-05 | 0.001566354 |
| MJCI2        | 97.03984622 | 1.243240929  | 0.318810341 | 3.899254777  | 9.63416E-05 | 0.001566354 |
| APOBEC3F     | 236.5941881 | 0.932749872  | 0.239221061 | 3.899112685  | 9.65458E-05 | 0.001567615 |
| DIT2         | 891.747994  | 0.692098612  | 0.177515664 | 3.898012538  | 9.69854E-05 | 0.001570601 |
| CCL5         | 1057.178913 | 1.499373258  | 0.384633144 | 3.898190473  | 9.69142E-05 | 0.001570601 |
| REEP2        | 7528.470617 | 0.834269102  | 0.214011504 | 3.898244186  | 9.68927E-05 | 0.001570601 |
| TNFRD2       | 1503.955962 | 0.548296633  | 0.140797335 | 3.895886147  | 9.78403E-05 | 0.001583055 |
| ED1          | 15242.80289 | 0.834624764  | 0.214257898 | 3.895421231  | 9.80282E-05 | 0.001584704 |
| STK3         | 644.8912313 | -0.468233425 | 0.120244269 | -3.894018705 | 9.8597E-05  | 0.001592902 |
| USP1         | 2390.336831 | 0.461461714  | 0.118511823 | 3.893893187  | 9.85847E-05 | 0.001593523 |
| GSPT1        | 5371.111022 | 0.360281858  | 0.092535975 | 3.89342698   | 9.88371E-05 | 0.001593523 |
| MIFM1        | 462.4824504 | 0.417893215  | 0.107292833 | 3.893020648  | 9.90037E-05 | 0.001594877 |
| PHLDB1       | 20372.98772 | -0.657809065 | 0.169043408 | -3.891361809 | 9.96832E-05 | 0.00160442  |
| PPP1CA       | 5322.593187 | 0.539204863  | 0.138613781 | 3.889890198  | 0.000100252 | 0.001612174 |
| SSR4         | 738.255531  | 0.701488863  | 0.180391306 | 3.888760605  | 0.00010078  | 0.001619243 |
| CAL          | 18.59316524 | 1.717290895  | 0.441715997 | 3.887771567  | 0.000101169 | 0.001624076 |
| RAC2         | 1133.053924 | 1.128100683  | 0.290213494 | 3.887140699  | 0.000101432 | 0.001626884 |
| RPU5D3       | 1338.206369 | 0.411951269  | 0.106012163 | 3.88588683   | 0.000101957 | 0.001633883 |
| GBA          | 4872.840123 | 0.632790912  | 0.163010183 | 3.881910319  | 0.000103639 | 0.001659396 |
| ELF2         | 1353.396642 | -0.503805333 | 0.12883501  | -3.880698518 | 0.000104157 | 0.001666239 |
| GATA1        | 8.088917417 | 3.01968713   | 0.778219529 | 3.880251053  | 0.000104349 | 0.001667876 |
| HLA-DQB2     | 25.46883152 | -1.481096107 | 0.38183031  | -3.878833263 | 0.000104959 | 0.001676155 |
| ETH1         | 1011.321102 | 0.617280921  | 0.159193272 | 3.877556591  | 0.000105511 | 0.001682053 |
| FLOT2        | 4958.250222 | 0.453536515  | 0.116895974 | 3.877715307  | 0.000105442 | 0.001683057 |
| ACAD11       | 1719.504282 | -0.433892819 | 0.111919525 | -3.876828236 | 0.000105827 | 0.001685638 |
|              |             |              |             |              |             |             |

|            |              |              |             |              |             |              |
|------------|--------------|--------------|-------------|--------------|-------------|--------------|
| HLPL2      | 1157.076542  | 0.64278037   | 0.16584589  | 3.87577321   | 0.000106286 | 0.001688579  |
| NUDF19     | 554.1002677  | 0.44171364   | 0.114006348 | 3.8744653    | 0.000106859 | 0.001696219  |
| SLCSDA1    | 902.0292301  | 0.63059355   | 0.162775138 | 3.874016411  | 0.000107056 | 0.001697882  |
| TRD6       | 115.0231121  | -0.958404697 | 0.247515844 | -1.872094135 | 0.000107904 | 0.001705859  |
| CD300L8    | 56.6219522   | 1.456231192  | 0.37625997  | 3.870282009  | 0.000108871 | 0.001721141  |
| ZN F3548   | 712.5443573  | -0.742875341 | 0.191976116 | -3.86962377  | 0.000109003 | 0.001722445  |
| NAPRT      | 2013.196303  | 0.696863798  | 0.180086166 | 3.869469229  | 0.000109072 | 0.001722445  |
| TRIM2      | 711.3803707  | 0.595500088  | 0.153893428 | 3.869561522  | 0.000109031 | 0.001722445  |
| BMS1       | 1590.18473   | 0.294304237  | 0.076086405 | 3.868026598  | 0.00010972  | 0.001731185  |
| TRIM1      | 5197.812295  | -0.472310575 | 0.122121771 | -3.867537866 | 0.000109994 | 0.001733174  |
| CYP206     | 128.6512676  | -0.916787569 | 0.237074447 | -3.867087246 | 0.000110143 | 0.001734894  |
| NRV1       | 405.0155081  | 0.580497912  | 0.150122218 | 3.866835441  | 0.000110257 | 0.001735202  |
| PP1A1      | 3431.795828  | -0.477749726 | 0.123566271 | -3.866344127 | 0.000110479 | 0.001736961  |
| GLR5       | 1883.7409707 | 0.41425143   | 0.107147699 | 3.866171965  | 0.000110557 | 0.001736961  |
| CLN23      | 187.1267303  | 1.07439605   | 0.277931281 | 3.865689503  | 0.000110778 | 0.001738914  |
| NUDF56     | 4479.081664  | 0.823645933  | 0.213164364 | 3.863900633  | 0.000111591 | 0.001750216  |
| TRIM5      | 1100.419373  | 0.35585124   | 0.092187785 | 3.863617242  | 0.00011172  | 0.001750759  |
| VMC2       | 5327.794023  | 0.389310142  | 0.100779804 | 3.863176204  | 0.000111922 | 0.001752444  |
| CH2        | 4639.630147  | -0.46419907  | 0.120206792 | -3.861670791 | 0.000112614 | 0.001761772  |
| CCDC146    | 416.7916338  | -0.907769096 | 0.235128936 | -3.860728968 | 0.000113049 | 0.001767078  |
| SPATAS1    | 414.3481891  | 0.482788953  | 0.125091433 | 3.859568426  | 0.000113587 | 0.001773986  |
| ATP2A3     | 437.8032129  | 0.980914577  | 0.254261535 | 3.857896069  | 0.000114367 | 0.001784652  |
| ILOR1      | 23.18495724  | 1.202523048  | 0.311826783 | 3.85638153   | 0.000115078 | 0.001792704  |
| CAPG       | 12691.54901  | 1.026594007  | 0.266201149 | 3.856460051  | 0.000115041 | 0.001792704  |
| F5         | 291.9222083  | 1.31837956   | 0.342181244 | 3.85286916   | 0.000116742 | 0.001817059  |
| SNP1       | 779.7013584  | 0.290713174  | 0.075459965 | 3.852548495  | 0.000116895 | 0.001817936  |
| URB7       | 2448.391127  | -0.538972021 | 0.139940697 | -3.85143158  | 0.000117429 | 0.001824705  |
| TNEM186    | 490.839498   | 0.38629881   | 0.100342617 | 3.84979802   | 0.000118215 | 0.001835374  |
| HL4        | 44.00181902  | 1.378401533  | 0.358080191 | 3.849421157  | 0.000118397 | 0.001836651  |
| FBL15      | 1830.148267  | 0.791130978  | 0.205638454 | 3.849055518  | 0.000118569 | 0.001837774  |
| CDN        | 51.47667754  | 1.408651721  | 0.366078444 | 3.847950469  | 0.000119111 | 0.001844605  |
| PLEKHA1    | 18712.99141  | -1.093193853 | 0.284144425 | -1.847317615 | 0.000119418 | 0.001846272  |
| ICAM1      | 4350.662527  | 1.15359974   | 0.299843938 | 3.8473339    | 0.000119411 | 0.001846272  |
| THB5       | 1252.936914  | 0.501248918  | 0.130334305 | 3.845870958  | 0.000120125 | 0.001855644  |
| REG        | 50.76455787  | 1.372310138  | 0.356906884 | 3.845009151  | 0.000120548 | 0.001859006  |
| PRSS36     | 214.2507133  | 0.976672823  | 0.254001698 | 3.845142896  | 0.000120482 | 0.001859006  |
| ARHGAP23   | 11443.2576   | -0.63939678  | 0.166313939 | -3.844516976 | 0.00012079  | 0.00186054   |
| SAMW50     | 1928.426312  | 0.42653299   | 0.110949053 | 3.84404044   | 0.000120846 | 0.00186054   |
| FOX1       | 3.525799948  | 3.65648664   | 0.95152054  | 3.842782567  | 0.000121647 | 0.001871315  |
| NSU6       | 547.6872202  | -0.438105486 | 0.114028728 | -3.84206237  | 0.000122005 | 0.001873479  |
| CCDC66     | 617.1686301  | -0.432315752 | 0.112528134 | -3.841845917 | 0.000122112 | 0.001873479  |
| FK2        | 2058.836183  | 0.78578802   | 0.204542758 | 3.841681169  | 0.000122194 | 0.001873479  |
| RNPEP      | 2654.724603  | 0.604175815  | 0.157164793 | 3.841774169  | 0.000122148 | 0.001873479  |
| CSOF46     | 16.19143422  | 2.46131179   | 0.640816497 | 3.840935502  | 0.000122566 | 0.001876059  |
| ESRR4      | 1849.950243  | 0.502741261  | 0.130884806 | 3.841106609  | 0.000122481 | 0.001876059  |
| TRPV5      | 66.22579524  | -1.741953583 | 0.453646004 | -1.839743883 | 0.000123163 | 0.001883546  |
| ROMD1      | 3642.771214  | 0.8074037    | 0.210286005 | 3.839550331  | 0.000123236 | 0.001883546  |
| ARG1U1     | 6042.736174  | -0.420796698 | 0.109659214 | -3.837317212 | 0.000124388 | 0.001896444  |
| GAA        | 8883.07373   | 0.574135678  | 0.149621102 | 3.837264065  | 0.000124413 | 0.001896444  |
| LINC45A    | 2641.012479  | 0.425622548  | 0.110918114 | 3.837267284  | 0.000124411 | 0.001896444  |
| NRPS17     | 1381.394396  | 0.6574625    | 0.171349143 | 3.836975713  | 0.000124559 | 0.001897102  |
| SNRPD3     | 2162.2365    | 0.361014309  | 0.094101778 | 3.836423811  | 0.000124839 | 0.001899799  |
| SLC9A9     | 1674.743383  | -0.885768655 | 0.230897715 | -3.836194981 | 0.000124955 | 0.0019       |
| CE3        | 324.1930266  | 0.852989107  | 0.224002117 | 3.835789394  | 0.000125371 | 0.001904748  |
| OXTR       | 1715.74888   | 1.227320239  | 0.320025524 | 3.835069857  | 0.000125529 | 0.001905574  |
| ZSCAN30    | 1724.722566  | -0.563540997 | 0.146887965 | -3.833926111 | 0.000126114 | 0.001912885  |
| ZNF14      | 1091.652008  | 0.47164763   | 0.123023444 | 3.833523389  | 0.000126321 | 0.001914453  |
| SNX21      | 2028.177658  | 0.434211957  | 0.113306571 | 3.832186594  | 0.000127009 | 0.001923297  |
| IRG1       | 2422.420921  | 0.466328915  | 0.121726625 | 3.830952473  | 0.000127648 | 0.001929801  |
| PGAM1      | 15032.55943  | 0.420324888  | 0.109717362 | 3.830978905  | 0.000127634 | 0.001929801  |
| AC240274.1 | 2611.703441  | -0.476378202 | 0.124358007 | -3.830699892 | 0.000127779 | 0.0019302    |
| PAX8       | 148.8465161  | 1.011316805  | 0.26404714  | 3.830061577  | 0.000128111 | 0.001933629  |
| HM13       | 6738.863124  | 0.623707322  | 0.16289019  | 3.829004822  | 0.000128662 | 0.001940361  |
| SLC4A11    | 771.4833859  | 0.917306623  | 0.239620239 | 3.828168379  | 0.0001291   | 0.001945373  |
| ZMAT1      | 1923.132408  | -0.818797306 | 0.213903773 | -3.827876873 | 0.000129253 | 0.001946087  |
| LUCL2      | 3484.762823  | -0.359388174 | 0.093911776 | -3.826870185 | 0.000129783 | 0.001952465  |
| ASB6       | 2264.696883  | 0.342460428  | 0.089504028 | 3.826184183  | 0.000130145 | 0.00195472   |
| USC3       | 38.08107506  | 1.950245094  | 0.509701984 | 3.826245837  | 0.000130112 | 0.00195472   |
| CREB5      | 2604.45952   | -0.704970503 | 0.184290625 | -3.825319383 | 0.000130603 | 0.001959997  |
| DPFSL2     | 1570.555202  | 0.830157363  | 0.217037097 | 3.824966078  | 0.000130795 | 0.001961292  |
| CTRP9A     | 1616.562788  | 0.31858091   | 0.08338441  | 3.823931103  | 0.000131329 | 0.001961312  |
| SPREB      | 1034.034542  | 0.983345705  | 0.257444795 | 3.824091386  | 0.000131254 | 0.001961312  |
| NP2L3      | 139.5086321  | 0.95445559   | 0.249550661 | 3.824251193  | 0.00013117  | 0.001961312  |
| RG14       | 17.57131809  | 1.710670867  | 0.447316411 | 3.824297129  | 0.000131146 | 0.001961312  |
| LTB        | 163.68151    | 1.201158679  | 0.314064647 | 3.824556268  | 0.000131008 | 0.001961312  |
| C9orf78    | 3463.872384  | 0.314226634  | 0.082178643 | 3.823701884  | 0.000131463 | 0.001961724  |
| KCNK6      | 582.6663384  | 0.727675062  | 0.190337633 | 3.823075045  | 0.000131798 | 0.001965128  |
| ARIDA2     | 2456.152983  | 0.72656493   | 0.19066793  | 3.8228028    | 0.000131943 | 0.00196571   |
| ENOX1      | 529.7816224  | -0.598027043 | 0.156459052 | -3.822259137 | 0.000132235 | 0.001968459  |
| AP2M1      | 19731.08341  | 0.452366876  | 0.11837275  | 3.821545703  | 0.000132618 | 0.00197257   |
| SRXN1      | 2298.709616  | 0.722678106  | 0.189346223 | 3.818718776  | 0.000134147 | 0.00199374   |
| KIF19      | 1176.970299  | -1.123089939 | 0.294152227 | -3.818056988 | 0.000134507 | 0.001997444  |
| SEC61A1    | 14203.15729  | 0.660897779  | 0.173198547 | 3.815839043  | 0.000135721 | 0.00201385   |
| MYL9P      | 19.47563942  | 1.087047438  | 0.284904937 | 3.8154742    | 0.000135922 | 0.002015205  |
| PTG152     | 3133.833863  | 0.597274563  | 0.156579803 | 3.814725179  | 0.000136335 | 0.00201808   |
| EIF5A      | 10389.33564  | 0.50222489   | 0.131650314 | 3.814840241  | 0.000136271 | 0.00201808   |
| EDDM13     | 5.767617853  | 2.118968895  | 0.555547525 | 3.814198899  | 0.000136625 | 0.002020762  |
| RBM1       | 3509.118873  | 0.428686014  | 0.112402182 | 3.813858472  | 0.000136814 | 0.002021926  |
| TN52       | 6531.265877  | -0.506241623 | 0.132774319 | -3.812797731 | 0.000137403 | 0.002029     |
| NAF1       | 414.9343251  | 0.336810172  | 0.088351338 | 3.812168323  | 0.000137753 | 0.002023254  |
| VPS25      | 1865.348629  | 0.470548945  | 0.123490685 | 3.810400308  | 0.000138742 | 0.0020245    |
| PREB       | 2816.595168  | 0.3328874    | 0.087368402 | 3.810157795  | 0.000138878 | 0.002024871  |
| WDR70      | 926.4013291  | -0.435251306 | 0.114268805 | -3.809012514 | 0.000139523 | 0.002025322  |
| CL16orf1   | 623.3101559  | 0.541558365  | 0.142190068 | 3.808678913  | 0.000139711 | 0.002025322  |
| CD8        | 169.429443   | 1.773325274  | 0.46658592  | 3.808862117  | 0.000139608 | 0.002025322  |
| ADA        | 885.1450643  | 0.903772219  | 0.237317431 | 3.808284182  | 0.000139934 | 0.0020254861 |
| PKM        | 61661.25691  | 0.574411716  | 0.150876191 | 3.807172715  | 0.000140565 | 0.002026242  |
| GPXMB      | 19043.70215  | 1.317217816  | 0.346050415 | 3.806433279  | 0.000140985 | 0.002026356  |
| SNY3       | 1721.872566  | 0.383454921  | 0.100737758 | 3.805465716  | 0.000140968 | 0.002026356  |
| SNF8       | 2932.062094  | 0.559977037  | 0.147137392 | 3.805810542  | 0.000141341 | 0.002026891  |
| RPP40      | 244.1379864  | 0.581121011  | 0.152708002 | 3.805439153  | 0.000141553 | 0.002020378  |
| NCF2       | 1374.453628  | 1.058687311  | 0.27828953  | 3.804265691  | 0.000142225 | 0.002027857  |
| RWD20B     | 858.688698   | 0.418191426  | 0.109961497 | 3.803071425  | 0.000142913 | 0.002028962  |
| SU5D3      | 158.6709956  | -1.033531814 | 0.271877732 | -3.801458133 | 0.000143847 | 0.002029937  |
| DNP2A      | 2637.467983  | -0.512780082 | 0.134928095 | -3.800395172 | 0.000144466 | 0.002106294  |
| PEX1       | 1176.520861  | -0.507280505 | 0.133511892 | -3.799549592 | 0.000144959 | 0.002111822  |
| PRSS35     | 265.328851   | 1.294730633  | 0.34078566  | 3.799252098  | 0.000145133 | 0.002112688  |
| ZNFBF2     | 1990.831538  | 0.462611993  | 0.121788774 | 3.798478117  | 0.000145587 | 0.002117623  |
| CL20orf3   | 1126.988436  | 0.373361081  | 0.0883449   | 3.796445788  | 0.000146785 | 0.002133367  |
| TM6M3      | 3295.218742  | 0.644468792  | 0.16681191  | 3.795147229  | 0.000147556 | 0.002142874  |
| RBM4       | 1816.995333  | 0.413066445  | 0.108991828 | 3.794839043  | 0.000147739 | 0.002143848  |
| GLI2       | 2791.547981  | 0.724601013  | 0.190961212 | 3.794493176  | 0.000147945 | 0.002145149  |
| SG13       | 10709.12311  | 0.602775017  | 0.158003008 | 3.7933399    | 0.000148634 | 0.002153447  |
| CCDC137    | 1502.072852  | 0.551432663  | 0.145378458 | 3.793083722  | 0.000148788 |              |

|           |             |              |              |              |             |             |
|-----------|-------------|--------------|--------------|--------------|-------------|-------------|
| PPS19     | 31806.34700 | 0.778714593  | 0.2054115311 | 1.790927703  | 0.000150088 | 0.002165472 |
| GPAA1     | 7169.129200 | 0.493434433  | 0.130156908  | 1.791071965  | 0.000149998 | 0.002165472 |
| NMF       | 6518.981250 | 0.831171205  | 0.21975250   | 1.791365111  | 0.000149822 | 0.002165472 |
| ANN09     | 164.385070  | 1.902714676  | 0.50202776   | 1.790058696  | 0.000150612 | 0.002170151 |
| ICLN      | 368.1175270 | -0.639540206 | 0.168851642  | -3.787586547 | 0.000152118 | 0.002188992 |
| L3MBTL4   | 504.8847330 | -0.604559224 | 0.159618647  | -3.787525334 | 0.000152157 | 0.002188992 |
| CUTA      | 7696.369380 | 0.633687471  | 0.167321187  | 3.787251828  | 0.000152323 | 0.002189667 |
| CEACAM4   | 72.88476388 | 1.63237328   | 0.431129875  | 3.786265933  | 0.000152928 | 0.002196657 |
| RHBD02    | 9967.054420 | 0.582845121  | 0.154065914  | 3.783089376  | 0.000154894 | 0.00222316  |
| RASS7     | 511.4505152 | 0.675918764  | 0.178702329  | 3.782372551  | 0.000155341 | 0.002226106 |
| EIF4A1    | 18490.74310 | 0.540228672  | 0.142824025  | 3.782477584  | 0.000155275 | 0.002226106 |
| NPPIB11   | 350.5303960 | -0.521506060 | 0.137927103  | -3.781026719 | 0.000156183 | 0.002234721 |
| TRN P1    | 1156.445040 | 1.089395820  | 0.288356579  | 3.781024457  | 0.000156184 | 0.002234721 |
| NRVX      | 13.19709900 | 2.077437550  | 0.549486968  | 3.780685764  | 0.000156397 | 0.002236028 |
| NETL3     | 2011.644230 | 0.368521605  | 0.097506210  | -3.779467899 | 0.000157164 | 0.002244459 |
| PAQ4      | 6698.800790 | 0.533499978  | 0.144158977  | 3.779362735  | 0.000157223 | 0.002244459 |
| SLC26A7   | 88.79949180 | -1.37082428  | 0.363297394  | -1.778495777 | 0.000157801 | 0.002250867 |
| ARRGDA    | 22343.80432 | 0.563467642  | 0.149146703  | 3.777942335  | 0.000158129 | 0.002253804 |
| TRP1      | 719.9196934 | -0.499975326 | 0.132358151  | -3.777442655 | 0.000158447 | 0.002256584 |
| IFNAR1    | 3594.276288 | 0.296204602  | 0.078420506  | 3.777132016  | 0.000158645 | 0.002257654 |
| ZNFL17    | 339.6627200 | -0.441006307 | 0.116798359  | -3.775791969 | 0.000159595 | 0.002266268 |
| DN42      | 169.7438070 | -0.834898876 | 0.221125777  | -3.775674139 | 0.000159575 | 0.002266268 |
| PARV8     | 1746.127586 | 0.602211648  | 0.159500664  | 3.775064643  | 0.000159619 | 0.002266268 |
| G.85      | 149.7778524 | 2.0042076    | 0.530886049  | 3.774501428  | 0.000160328 | 0.002274584 |
| TUSC2     | 3070.105045 | 0.523771472  | 0.138790226  | 3.773835431  | 0.000160757 | 0.002278914 |
| SCN11B    | 41.93589788 | 1.87402767   | 0.496804339  | 3.770906616  | 0.000162656 | 0.002304058 |
| PTTG1     | 1094.886060 | 1.345545691  | 0.356851381  | 3.770805244  | 0.000162852 | 0.00230907  |
| FAM107B   | 7282.683750 | -0.76209241  | 0.202272716  | -3.770213571 | 0.000163108 | 0.002309919 |
| CPPI08    | 3015.246580 | 0.452125741  | 0.119067349  | 3.769718258  | 0.000163423 | 0.002320799 |
| NR5       | 4703.904700 | 0.423240980  | 0.112271260  | 3.769806089  | 0.000163374 | 0.002320799 |
| RRM3      | 2980.585200 | -0.43990768  | 0.116762853  | -1.768242687 | 0.000164401 | 0.002316687 |
| ZBTB37    | 1279.624    | -0.690935131 | 0.183368619  | -1.768011997 | 0.000164553 | 0.002316687 |
| PSPN      | 254.1731800 | 0.607797251  | 0.161296412  | 3.768200694  | 0.000164428 | 0.002316687 |
| EIF3M     | 4514.224780 | 0.367040844  | 0.097396395  | 3.768525965  | 0.000164214 | 0.002316687 |
| OM1A1     | 572.3784808 | -0.344820792 | 0.09152361   | -3.767516078 | 0.000164853 | 0.002319103 |
| SDC4      | 5982.251740 | 0.707480877  | 0.187891177  | 3.765363837  | 0.000166307 | 0.002337808 |
| HMW2L     | 262.1904870 | -0.641021351 | 0.170334407  | -3.763311015 | 0.000167678 | 0.002355294 |
| EMC5      | 1774.548908 | 0.539628123  | 0.143406647  | 3.76292267   | 0.000167939 | 0.00235716  |
| FAM33A    | 728.6717601 | 0.926197348  | 0.246366273  | 3.759432398  | 0.000170299 | 0.002388467 |
| DNPEP     | 1767.504957 | 0.396147264  | 0.105397999  | 3.758584287  | 0.000170877 | 0.002394754 |
| NLRX1     | 963.6807020 | 0.529937334  | 0.141031978  | 3.757884162  | 0.000171356 | 0.002397815 |
| ALG2      | 1415.251670 | 0.473683398  | 0.126047464  | 3.757976433  | 0.000171293 | 0.002397815 |
| CAF9      | 7048.945110 | -0.30813790  | 0.08208408   | -3.757249763 | 0.000171791 | 0.002400956 |
| RLF5      | 131.3160004 | 1.235752670  | 0.328900940  | 3.757218350  | 0.000171813 | 0.002400956 |
| SLC26A6   | 1044.728790 | 0.784351241  | 0.208778826  | 3.75685291   | 0.000172064 | 0.002402242 |
| GZMA      | 105.7418320 | -1.306193811 | 0.347786953  | -1.755729764 | 0.000172837 | 0.002403991 |
| PAQR7     | 1085.723357 | 0.590950627  | 0.157340256  | 3.755876866  | 0.000172736 | 0.002403991 |
| GOL11A    | 79.9875570  | 1.348721969  | 0.359252302  | 3.754247261  | 0.000173863 | 0.002421863 |
| CR1       | 540.5434832 | 1.520360847  | 0.405020033  | 3.753791721  | 0.000174148 | 0.002424438 |
| CDP26     | 111.1426476 | -0.734981986 | 0.195876629  | -3.752269928 | 0.000175241 | 0.002435899 |
| ISY1      | 1191.121193 | 0.467291438  | 0.124536936  | 3.752231681  | 0.000175267 | 0.002435899 |
| ZNF263    | 1789.736043 | 0.323615047  | 0.086255095  | 3.752032663  | 0.000175407 | 0.002435998 |
| ITIC17    | 2092.571851 | -0.308139455 | 0.08213852   | -3.751461019 | 0.000175807 | 0.002437885 |
| NAF2      | 13442.50582 | 0.532686313  | 0.141988543  | 3.751614795  | 0.000175699 | 0.002437885 |
| WWW3      | 1943.363041 | -0.377604154 | 0.100673824  | -3.750767952 | 0.000176294 | 0.002441152 |
| EPBA12    | 10517.99880 | -0.693611350 | 0.184944699  | -3.750371795 | 0.000176573 | 0.002441152 |
| FOXD1     | 1261.559340 | 0.340069890  | 0.0906740    | 3.750416131  | 0.000176541 | 0.002441152 |
| NET28     | 7183.857520 | 0.679766069  | 0.181248414  | 3.750466295  | 0.000176500 | 0.002441152 |
| ACL1160.1 | 107.2831280 | -1.638125103 | 0.436846636  | -1.749886898 | 0.000176914 | 0.002442476 |
| WNN1      | 237.7371440 | 1.147038942  | 0.305888477  | 3.749859923  | 0.000176933 | 0.002442476 |
| PNPLA1    | 14.21243560 | 1.53453427   | 0.409293167  | 3.749230121  | 0.000177378 | 0.002446784 |
| PRAP1     | 26.96077838 | 2.05792164   | 0.548949155  | 3.74883834   | 0.000177656 | 0.002448776 |
| ZFX3      | 7985.164460 | 1.196222082  | 0.319291914  | 3.746484106  | 0.000179333 | 0.002470014 |
| DYN11L1   | 1690.083499 | 0.245189782  | 0.06545421   | 3.745974201  | 0.000179695 | 0.002471189 |
| RALGPS1   | 1424.190800 | -0.75659607  | 0.202013608  | -3.745277243 | 0.000180195 | 0.002478213 |
| CRN1.1    | 1282.271278 | 0.2832676    | 0.075665732  | 3.743670924  | 0.000181351 | 0.00249226  |
| SPG11     | 2468.786341 | -0.424938723 | 0.113551752  | -3.742247183 | 0.000182382 | 0.002504231 |
| TRMT13    | 639.9900516 | -0.575733862 | 0.15385344   | -3.742092869 | 0.000182494 | 0.002504231 |
| ZSW1M6    | 1559.572240 | -0.66865547  | 0.17871511   | -3.741460204 | 0.000182954 | 0.002508877 |
| CALM2     | 662.5763380 | 0.568462420  | 0.151946509  | 3.741201405  | 0.000183143 | 0.002509399 |
| AMBPA1    | 1384.46010  | 0.2716810    | 0.07362619   | 3.740867227  | 0.000183388 | 0.002510867 |
| MRPL52    | 2458.165720 | 0.717601760  | 0.191905795  | 3.739344631  | 0.000184501 | 0.002524248 |
| TRMT5     | 787.6377520 | 0.305829295  | 0.088412709  | 3.739089116  | 0.000184688 | 0.002524248 |
| RPL7L1    | 4871.330133 | 0.280272295  | 0.077803992  | 3.738840479  | 0.000184871 | 0.002525565 |
| PSD       | 2393.723566 | 0.453333034  | 0.121258664  | 3.738567575  | 0.000185075 | 0.002526483 |
| MWN1B1    | 4889.523228 | 0.416829013  | 0.111554129  | 3.736562843  | 0.000186553 | 0.002544769 |
| INDT22    | 1814.619432 | 0.587329953  | 0.157196295  | 3.736283702  | 0.000186766 | 0.002545709 |
| RP9       | 769.4763521 | 0.675340584  | 0.18077422   | 3.735823532  | 0.000187102 | 0.002546603 |
| SYCE1L    | 185.4277461 | 0.947444159  | 0.253605348  | 3.735899917  | 0.000187045 | 0.002546603 |
| CCD60     | 6.98623403  | 2.065743642  | 0.522995442  | 3.735552747  | 0.000187303 | 0.002547463 |
| IFPR2     | 2176.739501 | -0.758985147 | 0.203193124  | -3.735289514 | 0.000187499 | 0.002548249 |
| FBXO33    | 776.3441511 | 0.37044548   | 0.099202662  | 3.7342308    | 0.000188229 | 0.002557105 |
| THG1L     | 425.7316676 | 0.405589666  | 0.108642179  | 3.733261527  | 0.000189016 | 0.00256508  |
| ERP29     | 5158.354500 | 0.490030814  | 0.131268964  | 3.733028731  | 0.000189191 | 0.002565564 |
| IF14      | 1938.717006 | -0.591670911 | 0.158588091  | -3.732086702 | 0.000190822 | 0.002585777 |
| PRR7      | 1308.232610 | 0.597613317  | 0.160210227  | 3.731822088  | 0.000191341 | 0.002599912 |
| PSMB4     | 10534.93760 | 0.496292027  | 0.133069638  | 3.729566202  | 0.00019181  | 0.002595345 |
| CCDC71L   | 1344.184640 | 1.111896322  | 0.298183013  | 3.728905655  | 0.000192313 | 0.002600245 |
| WRAP53    | 567.3595780 | 0.665817559  | 0.124929272  | 3.728650232  | 0.000192508 | 0.002600977 |
| EID2      | 884.4236428 | 0.455264312  | 0.122118107  | 3.728065593  | 0.000192955 | 0.002605107 |
| KDM6B     | 1977.838328 | 0.789039393  | 0.21188063   | 3.727614901  | 0.00019333  | 0.002607858 |
| IFNAR2    | 1388.191820 | 0.397292155  | 0.106602246  | 3.72686477   | 0.000193876 | 0.002613715 |
| SCO1      | 1404.778540 | 0.245269590  | 0.065842885  | 3.725057576  | 0.000195257 | 0.002630399 |
| IBA57     | 546.085515  | 0.344737876  | 0.092565084  | 3.724275537  | 0.000195877 | 0.002636826 |
| TXN2      | 5158.662874 | 0.489078638  | 0.131330921  | 3.72401742   | 0.000196077 | 0.002637599 |
| RRP1      | 2507.405710 | 0.627390806  | 0.168510762  | 3.723149788  | 0.000196753 | 0.002644753 |
| ZNF396    | 166.6666210 | 0.743320044  | 0.19974169   | 3.721566817  | 0.00019799  | 0.002659451 |
| ZEB2      | 14287.45160 | -0.852149594 | 0.229029500  | -3.720699433 | 0.000198672 | 0.002666695 |
| FEAK1     | 2648.016260 | 0.587905033  | 0.158020498  | 3.720199831  | 0.000199065 | 0.002669099 |
| DNAM1     | 8113.211480 | 0.342391310  | 0.092053080  | 3.719498503  | 0.000199619 | 0.002675472 |
| ATP5PD    | 5392.404140 | 0.46171445   | 0.124176915  | 3.718198819  | 0.000200648 | 0.002687317 |
| NMPK3     | 2821.624400 | -0.590021138 | 0.158700545  | -3.717826791 | 0.000200944 | 0.002689322 |
| PSMG1     | 980.2876561 | 0.425451253  | 0.114558191  | 3.713844039  | 0.000204135 | 0.002730041 |
| ADG RG3   | 79.72013900 | 1.495836623  | 0.402905468  | 3.712624276  | 0.000205121 | 0.002741247 |
| POLDP2    | 4661.088470 | 0.31013511   | 0.083543006  | 3.711778915  | 0.000205808 | 0.002748428 |
| SHYL1     | 1456.442117 | -0.517436766 | 0.139452835  | -3.710478649 | 0.000206868 | 0.002758586 |
| PRICKLE3  | 273.3150523 | 0.769156497  | 0.207291669  | 3.710503661  | 0.000206847 | 0.002758586 |
| ELOA      | 2477.729200 | 0.360003574  | 0.09703826   | 3.709913753  | 0.00020733  | 0.002760753 |
| NET       | 849.0145243 | 0.640359327  | 0.172605336  | 3.709962517  | 0.00020729  | 0.002760753 |
| PRMT5     | 2161.107817 | 0.437128098  | 0.117833661  | 3.709704286  | 0.000207501 | 0.002761043 |
| EGLN2     | 5372.794921 | 0.432331641  | 0.116547009  | 3.709504379  | 0.000207665 | 0.002761213 |
| MEI5      | 846.6138610 | -0.73300248  | 0.19761633   | -3.709220189 | 0.000207899 | 0.002762338 |
| USF1      | 3272.237400 | 0.414917541  | 0.111884706  | 3.708438414  | 0.000208541 | 0.002768882 |
| RANDC1    | 1015.092780 | 0.412692172  | 0.1113       |              |             |             |

|          |             |              |             |              |             |             |
|----------|-------------|--------------|-------------|--------------|-------------|-------------|
| NATD1    | 951.8468211 | 0.604378611  | 0.163103367 | 3.70548654   | 0.000210985 | 0.002784938 |
| RPPZ1    | 1499.116604 | 0.574884675  | 0.155073871 | 3.704587189  | 0.000211735 | 0.002801198 |
| RPLZ8    | 35876.60985 | 0.790081952  | 0.213282407 | 1.704391889  | 0.000211898 | 0.002801346 |
| TMEM11   | 1341.687158 | 0.485858864  | 0.131172116 | 1.703979755  | 0.000212243 | 0.002801884 |
| NFE2     | 62.50510535 | 1.244381728  | 0.339594792 | 3.704015412  | 0.000212213 | 0.002801884 |
| PKP4     | 17195.94948 | -0.889386269 | 0.240203321 | -3.702639353 | 0.000213368 | 0.002810694 |
| EXO3L4   | 21.9492871  | 1.566442894  | 0.423045471 | 3.702776651  | 0.000213253 | 0.002810694 |
| POPA     | 1932.634    | 0.428170404  | 0.115630718 | 3.702912227  | 0.000213139 | 0.002810694 |
| ZC3H1A   | 5484.007702 | -0.398890858 | 0.107784242 | -3.700827586 | 0.000214897 | 0.002828818 |
| WDR34    | 2258.084629 | 0.794182652  | 0.214606961 | 3.700637891  | 0.000215058 | 0.002828913 |
| ABT82    | 938.5196701 | -0.531152747 | 0.143662341 | -3.6998369   | 0.000215738 | 0.002833811 |
| CTU2     | 1201.848838 | 0.501009511  | 0.135411013 | 3.699917     | 0.00021567  | 0.002833811 |
| SGSH     | 1710.39777  | 0.453735367  | 0.1226013   | 3.697965403  | 0.000217335 | 0.002852748 |
| CENPD1   | 721.3122679 | 0.345377601  | 0.093420388 | 3.69702598   | 0.00021814  | 0.002861284 |
| CLN3     | 2081.657277 | 0.549567251  | 0.148669322 | 3.69574693   | 0.000218528 | 0.002864333 |
| PSMD3    | 4850.7844   | 0.476721165  | 0.128867019 | 3.695388155  | 0.000218669 | 0.0028644   |
| PLSCR3   | 1563.971203 | 0.50156921   | 0.135700436 | 3.69615032   | 0.000218893 | 0.002865047 |
| CDX8A    | 7857.549882 | 0.537270059  | 0.145394101 | 3.695267244  | 0.000219656 | 0.002872983 |
| BBP1     | 1409.832973 | -0.487549296 | 0.131962019 | -3.694618346 | 0.000220217 | 0.002876727 |
| MA       | 17.41690508 | 1.529047199  | 0.413866709 | 3.694579262  | 0.000220254 | 0.002876727 |
| MFAP1    | 1471.192837 | 0.276189293  | 0.074760264 | 3.694332744  | 0.000220465 | 0.002877442 |
| MRPS11   | 2134.546358 | 0.463386109  | 0.125557747 | 3.692214292  | 0.00022231  | 0.00289947  |
| POE8     | 2166.254844 | -0.854170274 | 0.231178306 | -3.691661017 | 0.000222794 | 0.002903731 |
| APOL1    | 1390.659549 | 0.985581691  | 0.26703594  | 3.690820389  | 0.000223532 | 0.002911286 |
| AKR1B10  | 34.39556915 | 1.569336495  | 0.425257521 | 3.690320377  | 0.000223972 | 0.002914955 |
| CDXC174  | 834.2489379 | 0.292587029  | 0.079326558 | 3.688385793  | 0.00022568  | 0.002935119 |
| UTP4     | 1436.713547 | 0.455699055  | 0.123582035 | 3.687421524  | 0.000226538 | 0.002944194 |
| NMFX2    | 72.66688034 | -1.068703569 | 0.289861079 | -3.686590903 | 0.000226957 | 0.002944683 |
| IRIG2    | 1152.069909 | 0.430185473  | 0.116681311 | 3.68584127   | 0.000227055 | 0.002944683 |
| MCRP2    | 1822.189116 | 0.659051343  | 0.178744041 | 3.68712343   | 0.000226803 | 0.002944683 |
| GHMP1A   | 4854.065383 | 0.38123614   | 0.10341439  | 3.686490243  | 0.000227368 | 0.002946672 |
| PTK2     | 8603.829213 | -0.618294228 | 0.167751788 | -3.685768342 | 0.000228014 | 0.002952962 |
| NDUFS8   | 5188.909138 | 0.702730464  | 0.190699572 | 3.685017197  | 0.000228687 | 0.002959604 |
| ZDHC11   | 1278.705257 | -0.930752986 | 0.252644709 | -3.683995357 | 0.000229606 | 0.002969645 |
| SELENOM  | 6424.692196 | 0.943729105  | 0.256184333 | 3.683789301  | 0.000229792 | 0.002969734 |
| P4H      | 18353.02861 | 0.649702625  | 0.176388788 | 3.683355565  | 0.000230184 | 0.002972709 |
| WNT5B    | 2.425229179 | -2.150153782 | 0.58819599  | -3.682907905 | 0.000230688 | 0.002975816 |
| BAGALT7  | 1606.241765 | 0.484290778  | 0.131503111 | 3.682732478  | 0.000230747 | 0.002975816 |
| LPIN3    | 643.6653241 | 0.751613302  | 0.204114474 | 3.68231262   | 0.000231128 | 0.002978639 |
| GGFR     | 5572.171384 | 0.522288111  | 0.141865499 | 3.681572436  | 0.0002319   | 0.002985214 |
| HP4      | 3796.614119 | 0.335027841  | 0.091029908 | 3.680415001  | 0.000232855 | 0.002996703 |
| URL4A    | 2243.591256 | 0.321044983  | 0.087241571 | 3.679964193  | 0.000233276 | 0.003000028 |
| ILGL1    | 8058.851542 | 0.57946951   | 0.157473234 | 3.679747911  | 0.000233465 | 0.003000363 |
| INVS     | 486.6134209 | -0.58622823  | 0.159477953 | -3.678394499 | 0.000234707 | 0.003014162 |
| GMCX     | 1920.220348 | 0.410135574  | 0.111514523 | 3.677886912  | 0.000235193 | 0.003014162 |
| CLTB     | 6103.216672 | 0.676509607  | 0.183440005 | 3.677881861  | 0.000235179 | 0.003014162 |
| TPS111   | 2216.58711  | 0.694679727  | 0.188880352 | 3.677882432  | 0.000235178 | 0.003014162 |
| TBC1D9B  | 10721.4241  | -0.307271934 | 0.083550906 | -3.677661319 | 0.000235382 | 0.003014495 |
| TRIM43B  | 4.732891802 | 2.93854287   | 0.799205724 | 3.676829109  | 0.000236151 | 0.003022242 |
| CD86     | 51.82409591 | -1.235437233 | 0.336168429 | -3.675054308 | 0.000237799 | 0.003041218 |
| RBP7A    | 3898.38173  | 0.652870664  | 0.177665505 | 3.674718197  | 0.000238112 | 0.003043112 |
| ATF5     | 2090.279233 | 0.672180471  | 0.182973224 | 3.673654846  | 0.000239106 | 0.003053693 |
| TAF2R20  | 19.24587465 | -1.073913842 | 0.292412639 | -3.672597213 | 0.000240098 | 0.003064239 |
| MRP36    | 1175.075728 | 0.487237929  | 0.132701143 | 3.671935543  | 0.000240949 | 0.003070844 |
| CSD2     | 1843.54553  | 0.336769206  | 0.091717733 | 3.671710099  | 0.000240933 | 0.003070844 |
| NAV1     | 4415.784129 | -0.533930998 | 0.145432017 | -3.671344229 | 0.000241278 | 0.003072497 |
| EHRF1    | 2105.83476  | 0.388406763  | 0.105798323 | 3.671203793  | 0.000241412 | 0.003072497 |
| MRPL28   | 3922.755292 | 0.66187382   | 0.18030787  | 3.670798283  | 0.000241794 | 0.003075242 |
| STRN     | 3012.836233 | -0.758259952 | 0.206608001 | -3.670042695 | 0.000242519 | 0.003082335 |
| MOB3C    | 1541.187631 | 0.57479051   | 0.156643243 | 3.669434221  | 0.000243097 | 0.003085428 |
| POPF     | 1478.281637 | 0.481827664  | 0.13130503  | 3.669529377  | 0.000242997 | 0.003085428 |
| CL5orf39 | 798.359193  | 0.763166983  | 0.208091234 | 3.667643407  | 0.000244969 | 0.003107038 |
| MEG9     | 1285.15202  | 0.273838141  | 0.074674399 | 3.667095365  | 0.000245321 | 0.003109372 |
| RFX      | 1282.514441 | 0.704291468  | 0.192072013 | 3.666809429  | 0.000245596 | 0.00311071  |
| MRPL49   | 2547.139866 | 0.501259738  | 0.136738215 | 3.665835002  | 0.000246533 | 0.003118293 |
| YIF1A    | 3037.268242 | 0.657496806  | 0.179357845 | 3.665838004  | 0.000246533 | 0.003118293 |
| TICAM1   | 856.9039103 | 0.560136013  | 0.152832336 | 3.665014408  | 0.000247325 | 0.003126163 |
| IL32     | 2649.123379 | 1.295569996  | 0.343714501 | 3.664581779  | 0.000247743 | 0.003127164 |
| TCM      | 1344.387858 | 1.281466902  | 0.349880816 | 3.664676002  | 0.000247652 | 0.003127164 |
| TAF2R10  | 5.475866914 | -1.575791359 | 0.430127908 | -3.663542171 | 0.000248751 | 0.003137739 |
| ATM      | 2374.68022  | 0.684689595  | 0.186022708 | 3.66293633   | 0.000249341 | 0.003143022 |
| SSPO     | 544.1439247 | -0.012669479 | 0.27652192  | -3.662167105 | 0.000250091 | 0.003150323 |
| PTM5     | 12975.78377 | 0.752449745  | 0.20506688  | 3.661436238  | 0.000250805 | 0.003157158 |
| TUFT1    | 393.6727062 | 0.77595492   | 0.211994455 | 3.660260449  | 0.000251959 | 0.003169524 |
| TUBALC   | 5506.147513 | 0.929154328  | 0.253872878 | 3.659919628  | 0.000252294 | 0.003171578 |
| WNT2     | 117.5996039 | 1.08419664   | 0.296373791 | 3.658621973  | 0.000253575 | 0.003185504 |
| TMEM40   | 30.95455549 | 1.425847326  | 0.389813205 | 3.657770715  | 0.000254418 | 0.003193922 |
| PAN3     | 1091.88403  | -0.463810661 | 0.126832697 | -3.656869819 | 0.000255314 | 0.003202982 |
| TSTA3    | 1817.316784 | 0.550442572  | 0.150567127 | 3.65579514   | 0.000256386 | 0.003214244 |
| CTSD     | 16516.41616 | 1.005061088  | 0.274947194 | 3.655469526  | 0.000256712 | 0.003218139 |
| CDCA2EP3 | 834.998637  | 0.724302195  | 0.198155377 | 3.655223524  | 0.000256958 | 0.003217037 |
| FAM53C   | 2543.494879 | 0.338259648  | 0.092562895 | 3.654376286  | 0.000257808 | 0.003225487 |
| NIPPB5   | 7991.067504 | -0.503465142 | 0.137783243 | -3.654037526 | 0.000258149 | 0.003226228 |
| ANKK1A   | 1684.745604 | 0.529317102  | 0.144864851 | 3.653961999  | 0.000258217 | 0.003226228 |
| TBC1D7   | 758.6090448 | 0.413956213  | 0.113109749 | 3.653315403  | 0.000258878 | 0.003232266 |
| ADA      | 4657.448774 | 0.375773089  | 0.102873582 | 3.652765665  | 0.000259411 | 0.003237003 |
| FBP1D    | 5301.680673 | 0.748360983  | 0.204942443 | 3.651566627  | 0.000260645 | 0.003245564 |
| B3GAT3   | 5310.33363  | 0.574035542  | 0.157201053 | 3.651601111  | 0.000260661 | 0.003245564 |
| PLK3     | 1633.650868 | 0.871272833  | 0.238589736 | 3.651761583  | 0.000260448 | 0.003245564 |
| IMPDI1   | 2078.544788 | 0.536619307  | 0.146983767 | 3.650874623  | 0.000261349 | 0.003252125 |
| SLC39A1  | 5170.553769 | 0.583531563  | 0.159932026 | 3.648621569  | 0.000263651 | 0.00327635  |
| ENO1     | 55298.80668 | 0.589950286  | 0.161685058 | 3.648761948  | 0.000263507 | 0.00327635  |
| TCTA     | 206.8854084 | -0.617604481 | 0.169324732 | -3.647455821 | 0.000264885 | 0.003289022 |
| CHST2    | 3241.386744 | 0.640334065  | 0.175626875 | 3.645991349  | 0.000265633 | 0.003305591 |
| SHKBP1   | 3006.142052 | -0.45542638  | 0.124979103 | -3.644950439 | 0.000267443 | 0.003316765 |
| CEP85    | 1001.190439 | -0.643561128 | 0.176589951 | -3.644381384 | 0.000268036 | 0.003321876 |
| AVID     | 1319.601729 | 0.362339213  | 0.099437145 | 3.643902021  | 0.000268536 | 0.003325836 |
| SAMD4    | 4364.593807 | -0.766495522 | 0.210437668 | -3.642287745 | 0.000270121 | 0.003340981 |
| MRP1L3B  | 9397.961608 | 0.302881072  | 0.083151573 | 3.642519166  | 0.000269593 | 0.003340981 |
| BOLA2B   | 1391.766189 | 0.82212400   | 0.225910528 | 3.639157709  | 0.000273531 | 0.00338088  |
| NMR2     | 6.48058424  | -1.737105267 | 0.477473001 | -3.63811725  | 0.000274633 | 0.00339222  |
| DOCK10   | 4272.144518 | -0.84662755  | 0.232782996 | -3.636981976 | 0.000275851 | 0.003400443 |
| MED10    | 1699.715236 | 0.377868704  | 0.103894603 | 3.637038821  | 0.00027579  | 0.003400443 |
| SERTAD2  | 1429.941089 | 0.401993653  | 0.110525012 | 3.637128343  | 0.000275695 | 0.003400443 |
| NEK3     | 1437.512013 | -0.646953372 | 0.177923083 | -3.636140742 | 0.000276753 | 0.003408106 |
| ENOSF1   | 2320.222557 | -0.786634579 | 0.202601163 | -3.63588524  | 0.000277028 | 0.003408106 |
| AHP      | 18.41852794 | 1.831285445  | 0.503664998 | 3.635920334  | 0.00027699  | 0.003408106 |
| KLF9     | 3476.537596 | -0.510657062 | 0.140483969 | -3.634984579 | 0.000277997 | 0.003416138 |
| PLD5     | 266.2555427 | -0.708207271 | 0.194833572 | -3.63493492  | 0.000278051 | 0.003416138 |
| FAH2     | 35.17461137 | -0.879390333 | 0.24193997  | -3.634750004 | 0.00027825  | 0.003416305 |
| SCG1     | 8116.444579 | 0.642090042  | 0.176834566 | 3.634367108  | 0.000278664 | 0.003419105 |
| SHS4S    | 10571.74556 | 0.559636318  | 0.154027781 | 3.633238373  | 0.000279577 | 0.003428022 |
| CN1M     | 1805.638342 | 0.397628521  | 0.109454159 | 3.632821549  | 0.000280238 | 0.00343449  |
| RIF3     | 5527.019533 | 0.377405705  | 0.103930398 | 3.631331703  | 0.00028196  |             |

|            |             |              |             |              |             |             |
|------------|-------------|--------------|-------------|--------------|-------------|-------------|
| ALG3       | 1654.750541 | 0.596499109  | 0.164368933 | 3.629031233  | 0.000294482 | 0.003476609 |
| MGAT4B     | 4102.260004 | 0.439626508  | 0.120989471 | 3.628106206  | 0.000285508 | 0.003448622 |
| DNAC3D     | 1283.813212 | 0.473874443  | 0.130640521 | 3.627315176  | 0.000286383 | 0.003402892 |
| BCL9L      | 1985.585594 | 0.582803038  | 0.160666258 | 3.627414024  | 0.000286274 | 0.003402892 |
| SLX4P      | 512.971148  | -0.377188391 | 0.104038384 | -3.625473368 | 0.000288433 | 0.003308598 |
| CDMWD      | 1386.970438 | 0.45273165   | 0.124875185 | 3.625473319  | 0.000288433 | 0.003308598 |
| EFH2       | 5562.007774 | 0.711705073  | 0.196302413 | 3.625554731  | 0.000288342 | 0.003308598 |
| ESY1       | 3536.001408 | 0.399015046  | 0.110046251 | 3.625884944  | 0.000287974 | 0.003308598 |
| MNAT1      | 674.8924104 | -0.29898398  | 0.08249184  | -3.623369284 | 0.00029079  | 0.00334942  |
| BTNL3      | 12.31202265 | 1.730307945  | 0.477961722 | 3.620180997  | 0.000294397 | 0.00357172  |
| RNF113A    | 751.7027284 | 0.456585055  | 0.126119101 | 3.62026886   | 0.000294297 | 0.00357172  |
| ZNF526     | 401.7624565 | 0.341131957  | 0.094226705 | 3.620332005  | 0.000294225 | 0.00357172  |
| TTCL4      | 1898.386107 | -0.502640623 | 0.138877975 | -3.619286989 | 0.000295405 | 0.003579412 |
| IL3RA      | 208.560015  | 0.945832472  | 0.261331391 | 3.619283813  | 0.000295419 | 0.003579412 |
| SEBF2      | 25409.12377 | 0.653816861  | 0.180387076 | 3.619060303  | 0.000295675 | 0.003580151 |
| LRG3       | 533.7080569 | -0.79938460  | 0.220954083 | -3.617876564 | 0.00029703  | 0.003594198 |
| RAN        | 9122.021688 | 0.392124124  | 0.108392837 | 3.617620283  | 0.000297244 | 0.003595396 |
| TRPV2      | 748.1086398 | 0.768640363  | 0.211705795 | 3.61363115   | 0.000301938 | 0.003648798 |
| GAB2       | 6886.854996 | -0.703654846 | 0.1947827   | -3.612512029 | 0.000303245 | 0.003662191 |
| HST1H2BG   | 42.8467591  | 1.087854087  | 0.301156515 | 3.612254872  | 0.000303546 | 0.003663425 |
| PLEKH2     | 3782.471654 | 0.596880544  | 0.165280759 | 3.611312942  | 0.000304651 | 0.003674352 |
| FH2        | 542.5604638 | 1.039732262  | 0.28792991  | 3.611060278  | 0.000304948 | 0.003675528 |
| SEMMAC     | 4176.806624 | -0.472226873 | 0.130803114 | -3.610211239 | 0.000305948 | 0.003685171 |
| TLOC2      | 293.7433217 | 0.581254569  | 0.161012527 | 3.609998358  | 0.000306199 | 0.003685787 |
| SLC49A3    | 504.4815783 | 0.81908157   | 0.226905992 | 3.609783779  | 0.000306452 | 0.00368643  |
| SEC5B      | 2912.376956 | 0.517692957  | 0.143452259 | 3.608816353  | 0.000307597 | 0.003692971 |
| CR80       | 65.35348212 | 1.56627296   | 0.433990453 | 3.608880848  | 0.000307512 | 0.003692971 |
| NOB1       | 1387.735972 | 0.451001277  | 0.12496584  | 3.608964978  | 0.000307384 | 0.003692971 |
| POLR2D     | 1717.23382  | 0.376086598  | 0.104219599 | 3.608597788  | 0.000307858 | 0.003693676 |
| SH3TC1     | 1884.171222 | -0.692590325 | 0.19198901  | -3.607447756 | 0.000309224 | 0.003704774 |
| KMT1       | 16.83604205 | 1.774297785  | 0.491861354 | 3.607312853  | 0.000309585 | 0.003704774 |
| PWWP2B     | 745.6042871 | 0.628396333  | 0.174185188 | 3.607633633  | 0.000309002 | 0.003704774 |
| COX14      | 7744.234545 | 1.06752272   | 0.295880183 | 3.60704209   | 0.000309707 | 0.003706233 |
| PSRC1      | 4659.424668 | -0.59051939  | 0.164978282 | -3.606850135 | 0.000309937 | 0.003706568 |
| RTF1       | 2912.966362 | 0.33890892   | 0.093977606 | 3.606272882  | 0.000310626 | 0.00371241  |
| CI10orf95  | 10.94855767 | 1.24935593   | 0.339721729 | 3.605702814  | 0.000311309 | 0.003718158 |
| EPWA       | 1139.388754 | -0.55539164  | 0.154100873 | -3.60407848  | 0.000313262 | 0.003739063 |
| RBAK-RBAKN | 46.40534739 | 0.766935295  | 0.212812933 | 3.603800225  | 0.000313598 | 0.003740647 |
| ATP4F      | 913.3397017 | 0.355725341  | 0.098724273 | 3.603220664  | 0.000314298 | 0.003746576 |
| GKN1       | 3.659845199 | 2.549188888  | 0.707575005 | 3.602711899  | 0.000314915 | 0.003751493 |
| SH3A3      | 76.51215984 | 1.279545385  | 0.35520088  | 3.602315098  | 0.000315396 | 0.003754798 |
| ARSI       | 284.5964244 | 0.647340527  | 0.179711162 | 3.602116418  | 0.000315637 | 0.003755244 |
| EM3A       | 8112.494728 | -1.029391753 | 0.285809108 | -3.601675843 | 0.000316173 | 0.003759188 |
| MPL2       | 1635.722783 | 0.47968772   | 0.133211258 | 3.600954965  | 0.00031705  | 0.003767198 |
| PAH2       | 1043.520078 | 0.698125413  | 0.193889932 | 3.600701735  | 0.000317359 | 0.003768439 |
| USP5       | 6690.590728 | -0.699983778 | 0.194411661 | -3.600523627 | 0.000317577 | 0.003768594 |
| TUBB8      | 9.94166473  | -1.311432904 | 0.364322473 | -3.599648662 | 0.000318647 | 0.003776433 |
| NOCT       | 185.8977737 | 0.703833305  | 0.195626645 | 3.599679753  | 0.000318609 | 0.003776433 |
| CS         | 385.4692824 | -0.600136326 | 0.166754918 | -3.5989123   | 0.000319551 | 0.003784707 |
| LILRA2     | 1274.618709 | 0.95347868   | 0.265470172 | 3.598701359  | 0.00031981  | 0.003785345 |
| SRRM1      | 4207.762292 | -0.453488572 | 0.126100958 | -3.596234147 | 0.000322857 | 0.003818957 |
| DEAF1      | 9.440697305 | 3.322768187  | 0.92431163  | 3.594857057  | 0.00032457  | 0.003836751 |
| CCDC43     | 1273.092581 | 0.233401773  | 0.064931468 | 3.59458643   | 0.000324907 | 0.00383828  |
| ITK        | 129.9039479 | -0.69625712  | 0.194366063 | -3.594381151 | 0.000325164 | 0.003838846 |
| NCK2       | 2381.701621 | -0.500097928 | 0.139176713 | -3.593258658 | 0.000326568 | 0.003845898 |
| FAM136A    | 1123.815724 | 0.449182945  | 0.12500789  | 3.59326745   | 0.000326596 | 0.003845898 |
| FLBD1      | 838.8259508 | 1.004164671  | 0.279456648 | 3.59327529   | 0.000326547 | 0.003845898 |
| HST1HH     | 361.402072  | 0.730252718  | 0.203221811 | 3.593377651  | 0.000326419 | 0.003845898 |
| HST2HGAM   | 734.8320941 | 1.38498085   | 0.385498685 | 3.592770276  | 0.000327181 | 0.003850321 |
| ANKK2      | 18032.5128  | 0.961805407  | 0.267764512 | 3.591982374  | 0.000328172 | 0.003859529 |
| ARHGAP21   | 17727.76927 | -0.712242952 | 0.198377295 | -3.590345122 | 0.000330024 | 0.003878938 |
| INP58      | 1142.211345 | -0.27401403  | 0.075870582 | -3.590342876 | 0.000330243 | 0.003878938 |
| NR2F6      | 1589.692966 | 0.552698269  | 0.154003048 | 3.588878777  | 0.000332103 | 0.003894299 |
| PIGH       | 1122.292313 | 0.245426327  | 0.06839379  | 3.588430006  | 0.000332675 | 0.003902529 |
| Clorf167   | 36.56692503 | 0.912418103  | 0.254287916 | 3.588130017  | 0.000333058 | 0.003904533 |
| SIK3       | 5926.103966 | -0.603599125 | 0.16827769  | -3.586923043 | 0.000334603 | 0.003920152 |
| RPL2       | 24398.98003 | 0.755799755  | 0.210732253 | 3.586540479  | 0.000335094 | 0.003923411 |
| CT10orf8   | 294.4517836 | -0.724006224 | 0.202039356 | -3.583491043 | 0.000339032 | 0.003967002 |
| SLT1       | 339.4054032 | -0.50930307  | 0.142178439 | -3.58139971  | 0.000340791 | 0.003983336 |
| UQCPRF1    | 4384.25230  | 0.70012694   | 0.131211981 | 3.58208671   | 0.000340861 | 0.003983336 |
| CCDC2      | 1212.267813 | 0.360346616  | 0.100863598 | 3.581564553  | 0.000341543 | 0.003988778 |
| GPR142     | 6.40011183  | -2.39528606  | 0.66896294  | -3.580489016 | 0.000342952 | 0.004026897 |
| BLOC1S2    | 3494.98629  | 0.621658023  | 0.173683565 | 3.579259479  | 0.000344569 | 0.004019029 |
| SLF2       | 2845.821117 | -0.59319788  | 0.165813571 | -3.578234063 | 0.000345924 | 0.004012275 |
| SENP6      | 2958.161007 | -0.35016363  | 0.097870726 | -3.577817856 | 0.000346475 | 0.004033596 |
| DNL2       | 987.2605118 | 0.849462283  | 0.237419942 | 3.57789359   | 0.00034638  | 0.004033596 |
| SOX18      | 727.0589223 | 0.822960743  | 0.230053119 | 3.577264002  | 0.000347209 | 0.004033598 |
| RNF20      | 7562.818566 | -0.408832396 | 0.114295045 | -3.576991416 | 0.000347572 | 0.004040126 |
| ZDHHC16    | 1064.155043 | 0.345232769  | 0.096527636 | 3.57651739   | 0.000348202 | 0.004046039 |
| ZNF738     | 431.4082833 | -0.593579454 | 0.166073241 | -3.574202866 | 0.000351296 | 0.004079002 |
| TIMM50     | 3154.29074  | 0.398413646  | 0.111479332 | 3.574064962  | 0.000351482 | 0.004079002 |
| TPCN1      | 4710.270104 | -0.455693653 | 0.127509353 | -3.573805696 | 0.000351883 | 0.004080476 |
| ZNF83      | 3074.349407 | -0.491434726 | 0.137530599 | -3.573276599 | 0.000352542 | 0.004086162 |
| PRPF31     | 3007.078127 | 0.488049594  | 0.136590067 | 3.573064919  | 0.000352841 | 0.004087051 |
| AC093311.1 | 1276.922336 | 0.380761613  | 0.106878451 | 3.572292071  | 0.000353869 | 0.00409639  |
| CL4orf119  | 2189.568792 | 0.519251267  | 0.14544098  | 3.571020223  | 0.000355593 | 0.004111187 |
| HTRA2      | 1612.497973 | 0.36702743   | 0.102772998 | 3.571163876  | 0.000355996 | 0.004111187 |
| ANKRD44    | 933.45254   | -0.631940169 | 0.177052378 | -3.569227337 | 0.000358036 | 0.004136827 |
| PUS1       | 971.5057665 | 0.511881795  | 0.143438055 | 3.56886103   | 0.000358881 | 0.00414318  |
| HDI        | 4383.244949 | -0.67071236  | 0.187967141 | -3.56824759  | 0.000359384 | 0.004147202 |
| SLC15A3    | 3730.430595 | 0.971944292  | 0.272414849 | 3.567882346  | 0.000359877 | 0.004150299 |
| LMLN2      | 30.44426232 | -1.361479308 | 0.381621388 | -3.567617922 | 0.000360241 | 0.004151589 |
| NMNAT1     | 543.3072788 | 0.294733093  | 0.082616755 | 3.567473605  | 0.000360444 | 0.004151589 |
| PPP1R4B    | 6358.708644 | -0.770290614 | 0.215995251 | -3.566238659 | 0.000362142 | 0.004168587 |
| PPP1R14B   | 2574.664441 | 0.691576201  | 0.193938055 | 3.565964411  | 0.000362521 | 0.004170344 |
| SD4        | 8642.616229 | 0.440014899  | 0.123426172 | 3.565004797  | 0.00036385  | 0.004183022 |
| LSM7       | 2803.019276 | 0.666728339  | 0.187076952 | 3.563925612  | 0.00036533  | 0.004197647 |
| MYS1       | 3367.922085 | -0.609738333 | 0.17110794  | -3.563473976 | 0.000365979 | 0.00420226  |
| CCDC180    | 654.122242  | 0.660356539  | 0.185355872 | 3.562643099  | 0.00036714  | 0.004212962 |
| RNF1       | 2078.303662 | 0.941333002  | 0.264246594 | 3.562327345  | 0.000367582 | 0.004215469 |
| DMX        | 2550.138348 | 0.44510276   | 0.124980666 | 3.561384427  | 0.000368913 | 0.00422827  |
| KSR1       | 2182.888443 | -0.403678862 | 0.113372933 | -3.560638224 | 0.000369969 | 0.004237505 |
| CDK7       | 645.4292791 | 0.316157898  | 0.088809004 | 3.559939657  | 0.00037094  | 0.004245996 |
| ASTE1      | 442.3788019 | -0.227043042 | 0.063783499 | -3.559589025 | 0.000371436 | 0.00424903  |
| Cl19orf53  | 4694.146752 | 0.552695776  | 0.155329064 | 3.558225125  | 0.000373369 | 0.0042689   |
| TAD4B      | 1210.539961 | 0.2318312    | 0.065160986 | 3.557822175  | 0.000373942 | 0.004272401 |
| COL4A5     | 4694.500414 | -1.002278676 | 0.286823235 | -3.557168846 | 0.000374873 | 0.00427773  |
| PSMA4      | 4281.550129 | 0.468812058  | 0.131789084 | 3.557290504  | 0.0003747   | 0.00427773  |
| RPL13      | 48959.00533 | 0.616788197  | 0.173490831 | 3.55516308   | 0.000377745 | 0.004302508 |
| PTP        | 3682.313751 | 0.651030226  | 0.183121266 | 3.555186348  | 0.000377711 | 0.004302508 |
| NOC2L      | 4137.974922 | 0.542336924  | 0.152541688 | 3.555204725  | 0.000377685 | 0.004302508 |
| NAT2       | 18511.7028  | -0.332356541 | 0.093491888 | -3.554923927 | 0.000378088 | 0.004303763 |
| SOX5       | 1963.60403  | 0.742024647  | 0.2087941   | 3.554539369  | 0.000378642 | 0.004304801 |
| RNF185     | 3049.936422 | 0.225357762  | 0.063400051 | 3.554535863  | 0.000378647 |             |

|             |              |              |             |              |              |             |
|-------------|--------------|--------------|-------------|--------------|--------------|-------------|
| BRD         | 1132.85870   | 0.23020111   | 0.06480498  | 1.51229879   | 0.002381966  | 0.00433463  |
| ADG RG 6    | 134.217270   | -0.81372670  | 0.22913845  | -3.55124478  | 0.002383414  | 0.00434559  |
| FWP2        | 5238.562972  | 0.77052178   | 0.21696899  | 1.55129923   | 0.002383334  | 0.00434559  |
| DCU N 1D0   | 724.105150   | 0.48872098   | 0.13786703  | 1.54950588   | 0.002383955  | 0.004371707 |
| CDPRS       | 3770.374625  | 0.434540258  | 0.12243764  | 3.549215456  | 0.002383861  | 0.00437384  |
| G O L G A N | 1328.872529  | -0.69047656  | 0.194555829 | -3.548989332 | 0.0023836713 | 0.004374911 |
| SPAT6A      | 1036.717946  | -0.641169925 | 0.180726548 | -3.54773142  | 0.002383559  | 0.004393309 |
| CLEC10A     | 163.3526061  | 1.795292868  | 0.506210983 | 3.546530851  | 0.002390339  | 0.004407817 |
| STAT5A      | 1851.603404  | 0.60033569   | 0.169272609 | 3.546561325  | 0.002390294  | 0.004407817 |
| STAT6       | 2955.912935  | 0.548185628  | 0.154581975 | 3.546254471  | 0.002390762  | 0.004409892 |
| UQCRCL      | 8298.373906  | 0.469398989  | 0.132397095 | 3.545387361  | 0.002392037  | 0.004418863 |
| DNAC5B      | 70.89824691  | 1.294319904  | 0.348134922 | 3.545521653  | 0.002391837  | 0.004418863 |
| SHCA        | 745.6414083  | -0.653909959 | 0.184476005 | -3.54513117  | 0.002392418  | 0.004420456 |
| FAM9B9      | 2121.619131  | 0.510944121  | 0.144175797 | 3.543898021  | 0.002394258  | 0.00443847  |
| NMP3        | 38215.00986  | -0.561612445 | 0.158496348 | -3.543380161 | 0.002395033  | 0.004444481 |
| DTOS        | 1127.536772  | 1.291952520  | 0.36466453  | 3.542657677  | 0.002395616  | 0.00445395  |
| CIAPN 1     | 1721.289304  | 0.418673623  | 0.118241656 | 1.540840718  | 0.00239887   | 0.00447945  |
| RPL2L1      | 962.0532891  | 0.458924085  | 0.129605096 | 1.540941684  | 0.002398707  | 0.00447945  |
| AUP1        | 7661.244799  | 0.469936817  | 0.132754199 | 3.539901707  | 0.002400276  | 0.004482502 |
| TACK3       | 32.5571194   | -1.381021967 | 0.390184435 | -3.539408145 | 0.002401025  | 0.004492865 |
| HCDB7       | 1098.494328  | 0.712107545  | 0.201194504 | 3.539398597  | 0.002401014  | 0.004492865 |
| C16o9P5     | 190.5720851  | 0.515024542  | 0.145510995 | 3.539420114  | 0.002401007  | 0.004492865 |
| ANKK022     | 209.7143171  | -1.14666181  | 0.324243027 | -3.536427045 | 0.002400579  | 0.004538228 |
| FEMA        | 2515.670222  | 0.28666049   | 0.081044128 | 3.53642951   | 0.002400581  | 0.004538228 |
| BACK1       | 28936.11293  | 0.54316602   | 0.153612752 | 3.535943554  | 0.0024006322 | 0.004543749 |
| PRR18       | 5705.506689  | -1.155228505 | 0.326786715 | -3.535114658 | 0.002407598  | 0.004552623 |
| GSTM1       | 1787.329204  | 0.516502045  | 0.146124315 | 3.534675552  | 0.002408278  | 0.004560073 |
| FFAR1       | 116.9251420  | -1.176138253 | 0.33276980  | -3.534205516 | 0.002408701  | 0.004560115 |
| NUAN1       | 12901.35188  | 0.306412190  | 0.086709381 | 1.533783544  | 0.002409658  | 0.004560115 |
| SPTYZD1     | 662.6143692  | 0.443141039  | 0.125403771 | 3.533711303  | 0.002409764  | 0.004560115 |
| PCDB        | 2972.681512  | 0.480770275  | 0.186040252 | 1.534030189  | 0.002409274  | 0.004560115 |
| C19o9f48    | 1867.572254  | 0.74368808   | 0.210436025 | 3.534031999  | 0.002409268  | 0.004560115 |
| CL2o6F7     | 5521.930781  | 0.626978398  | 0.177408317 | 3.534098106  | 0.002409169  | 0.004560115 |
| HPA8        | 45352.66481  | 0.314358296  | 0.088971764 | 3.533236618  | 0.002410505  | 0.004565597 |
| PLK2        | 1637.564149  | 1.051437326  | 0.297606098 | 3.53298314   | 0.002410899  | 0.004567221 |
| KLRG2       | 9.324663939  | 1.816946966  | 0.514429845 | 3.531961898  | 0.002412489  | 0.004582131 |
| PIDD1       | 3748.43581   | 0.737852787  | 0.208959556 | 3.531072658  | 0.002413878  | 0.004589265 |
| GPATCH      | 1846.050232  | 0.517554513  | 0.146568543 | 3.531143893  | 0.002413767  | 0.004589265 |
| PAR52       | 298.3697744  | 0.375579618  | 0.106358779 | 3.531251679  | 0.002413598  | 0.004589265 |
| TSEN34      | 1806.568779  | 0.447966133  | 0.126870635 | 3.530889056  | 0.002414165  | 0.00458965  |
| TNEMD22     | 4121.643507  | 0.476764467  | 0.13505222  | 3.530223093  | 0.002415209  | 0.004598849 |
| FAM9C5      | 829.998561   | -1.120964251 | 0.317579737 | -3.529713698 | 0.00241601   | 0.004601825 |
| NIAT14      | 2182.663180  | 0.601121     | 0.170301108 | 1.529756714  | 0.002415942  | 0.004601825 |
| PHF21A      | 2114.859187  | 0.298950004  | 0.084710958 | 1.529059408  | 0.002417039  | 0.00461048  |
| RP65        | 380.4058103  | -1.299843424 | 0.368359661 | -3.528734446 | 0.002417552  | 0.004610584 |
| RPL7        | 29047.62048  | 0.454463133  | 0.126230044 | 3.528845605  | 0.002417377  | 0.004610584 |
| DENN1DD     | 871.2376256  | 0.931178866  | 0.263940041 | 3.527993947  | 0.002418722  | 0.004615205 |
| SIGLEC12    | 33.49371219  | 1.775447939  | 0.50323713  | 3.528054339  | 0.002418626  | 0.004615205 |
| CD30C       | 292.7424853  | 0.928654867  | 0.263217937 | 3.528083521  | 0.00241858   | 0.004615205 |
| PER2        | 867.9644941  | -0.43321272  | 0.122834146 | -3.527697588 | 0.002419191  | 0.004617613 |
| PLPP6       | 544.3117252  | 0.329451479  | 0.093418645 | 3.526613741  | 0.00242091   | 0.004633783 |
| GPRC5D      | 2.502498103  | -1.63866254  | 0.464798993 | -3.52542504  | 0.002422616  | 0.004649789 |
| ITLL11      | 685.2085609  | -0.712663273 | 0.202197114 | -3.524596661 | 0.002424128  | 0.004663196 |
| ACY1        | 1294.786579  | 0.508867582  | 0.144831566 | 3.524463663  | 0.002424341  | 0.004663196 |
| FRL1        | 4962.492699  | -0.762932941 | 0.216510761 | -3.523764531 | 0.002425462  | 0.004667168 |
| RNF187      | 9951.118207  | 0.479489892  | 0.136071653 | 3.523804365  | 0.002425398  | 0.004667168 |
| COMMD4      | 3915.878708  | 0.627058143  | 0.176527246 | 1.523964576  | 0.002425141  | 0.004667168 |
| SILCSA20    | 1166.933924  | 0.326965934  | 0.092799715 | 1.523350637  | 0.002426127  | 0.004674882 |
| ATP6VD02    | 83.55778423  | 1.42419841   | 0.406621083 | 1.522738745  | 0.002427112  | 0.004679697 |
| PAPPLG      | 793.1221478  | -0.510443907 | 0.144914655 | -3.522376042 | 0.002427697  | 0.00468332  |
| DNAH2       | 18516.96894  | -0.978577683 | 0.27786053  | -3.521830484 | 0.002428578  | 0.004689276 |
| VPREB3      | 30.08322833  | 1.311201298  | 0.372317988 | 3.521724282  | 0.00242875   | 0.004689276 |
| IL17RE      | 198.9392097  | 0.735248099  | 0.208903797 | 3.51955355   | 0.002432274  | 0.004725014 |
| MRPL11      | 1368.79348   | 0.508875061  | 0.144614527 | 3.518837771  | 0.002433442  | 0.004734971 |
| TRH         | 69.39346537  | 1.478919065  | 0.4203499   | 3.518308138  | 0.002434308  | 0.004741622 |
| SPATA13     | 4318.501461  | -0.680839799 | 0.193531509 | -3.517979066 | 0.002434847  | 0.004744695 |
| BUSP13      | 8.230228117  | 1.549602824  | 0.440524658 | 3.517636102  | 0.002435419  | 0.004748126 |
| TSGA10      | 265.6504788  | -0.539468278 | 0.153376749 | -3.517275138 | 0.002436002  | 0.004748861 |
| BAG5        | 2263.441172  | 0.192660638  | 0.054775329 | 3.517288538  | 0.00243598   | 0.004748861 |
| ABCAR       | 3181.334002  | -0.928091959 | 0.263927898 | -3.516460398 | 0.002437342  | 0.004758718 |
| TESK2       | 793.8561930  | 0.777241191  | 0.221040929 | 1.51627725   | 0.002437544  | 0.004758718 |
| RMB3D       | 838.664552   | 0.354427614  | 0.100796918 | 1.516254483  | 0.002437681  | 0.004758718 |
| PRKX1       | 15999.14599  | -0.561264412 | 0.159641006 | -3.515791    | 0.002438846  | 0.004764222 |
| LLGL2       | 599.2676671  | -0.521968178 | 0.148501153 | -3.514862584 | 0.002439982  | 0.004775277 |
| SFY2        | 1964.92304   | 0.370683543  | 0.10545897  | 3.514955091  | 0.002439828  | 0.004775277 |
| NUCB1       | 12423.54068  | 0.525890495  | 0.149654942 | 3.51420023   | 0.002441379  | 0.004787626 |
| RBM9        | 7351.420654  | -0.737618766 | 0.077894039 | -3.512704836 | 0.00244357   | 0.004808559 |
| SMURF1      | 1716.223272  | -0.253168874 | 0.072276741 | -3.510632697 | 0.002447042  | 0.004843345 |
| ADG B       | 30.95936633  | -0.929082037 | 0.26466739  | -3.51037593  | 0.002447474  | 0.004845177 |
| BU1D3       | 3263.235884  | 0.437523736  | 0.124728833 | 3.50799439   | 0.00245183   | 0.00488947  |
| HDAC3       | 2230.006663  | 0.348925028  | 0.099487489 | 3.5072252    | 0.002452806  | 0.004894286 |
| ECTP1       | 1163.376939  | 0.464454438  | 0.132424166 | 3.507323871  | 0.002452638  | 0.004894286 |
| ELOVL3      | 15.81856901  | 1.528497782  | 0.435962815 | 3.506027871  | 0.002454848  | 0.004910595 |
| OPCTL       | 428.158457   | 0.478327134  | 0.136428418 | 1.506066721  | 0.002454781  | 0.004910595 |
| CCP1        | 540.2140767  | 0.853108198  | 0.243482388 | 1.505417859  | 0.002455891  | 0.00491898  |
| REXO4       | 1561.860362  | 0.43466719   | 0.124004788 | 1.505245185  | 0.002455687  | 0.004919292 |
| APP         | 1160.847084  | -0.40725272  | 0.116191362 | -3.50495298  | 0.002456688  | 0.004921814 |
| SMN6A       | 5697.138184  | -0.652779079 | 0.186261836 | -3.504631396 | 0.00245724   | 0.004924882 |
| NMPKAP3     | 2468.881097  | 0.495194485  | 0.141312445 | 3.504252474  | 0.002457891  | 0.004929015 |
| RICBA       | 4683.400047  | 0.328669128  | 0.093796229 | 3.504076143  | 0.002458194  | 0.004929401 |
| RETSAT      | 4405.765756  | 0.566319171  | 0.161652421 | 3.503313874  | 0.002459508  | 0.004934887 |
| CDA         | 136.2950266  | 0.836856125  | 0.23886423  | 3.50342163   | 0.002459322  | 0.004934887 |
| HST1HD      | 7.324050728  | 2.087987901  | 0.595971995 | 3.503500026  | 0.002459187  | 0.004934887 |
| TNEMD50     | 890.6603461  | -0.326101217 | 0.093088223 | -3.503141507 | 0.002459805  | 0.004935206 |
| DDX28       | 678.1995881  | 0.361610711  | 0.103237391 | 3.50271068   | 0.002460549  | 0.004940317 |
| NRP530      | 1274.229207  | 0.269386386  | 0.076911333 | 3.502466816  | 0.002460971  | 0.004941965 |
| FAP5        | 5725.07899   | 0.703315104  | 0.20082427  | 3.502141963  | 0.002461534  | 0.004945118 |
| LRRK6       | 83.06447681  | -0.900793679 | 0.257254791 | -3.501562307 | 0.002462539  | 0.004953008 |
| RPL19       | 24765.6876   | 0.583481159  | 0.166674009 | 1.500731727  | 0.002463981  | 0.004963684 |
| ND90C       | 689.3415044  | 0.420222633  | 0.120036748 | 1.500783179  | 0.002463893  | 0.004963684 |
| EFP1KMT1    | 463.4788143  | 0.432709213  | 0.123675739 | 3.4987421    | 0.002464748  | 0.004969979 |
| CTNNA3      | 1934.860788  | -1.498761765 | 0.428447427 | -3.498129211 | 0.0024648545 | 0.005005692 |
| PSMD6       | 2772.185286  | 0.209026657  | 0.059763708 | 3.497551664  | 0.002464955  | 0.005013518 |
| ARVAP15     | 295.8606561  | -0.794868869 | 0.227302336 | -3.496967437 | 0.002470579  | 0.005021601 |
| IFI44L      | 4055.135291  | -0.885352784 | 0.253246444 | -3.496012702 | 0.002472266  | 0.005036686 |
| ZSCAN22     | 2531.3531894 | 0.304772125  | 0.087222197 | 3.494203732  | 0.002475478  | 0.005068007 |
| DHK35       | 594.2309762  | -0.292762638 | 0.083808171 | -3.493246954 | 0.002477185  | 0.005080325 |
| SF3A3       | 3388.915892  | 0.374726403  | 0.107270475 | 3.493285573  | 0.002477116  | 0.005080325 |
| UFSP1       | 103.071284   | 0.646693158  | 0.185160683 | 3.492605166  | 0.002478333  | 0.005089609 |
| LCMT2       | 1809.326441  | 0.647731166  | 0.185535015 | 3.49153234   | 0.00248094   | 0.005114397 |
| LSR         | 954.1800851  | 0.891948834  | 0.255504984 | 3.490929297  | 0.002481344  | 0.005115733 |
| GTD1        | 2131.74457   | -0.630939361 | 0.180757671 | -3.490526953 | 0.002482071  | 0.005120507 |
| YBK3        | 4252.440418  | 0.752710823  | 0.215663099 | 1.490216161  | 0.002482163  | 0.005123499 |
| ABC72       | 2966.114949  | 0.371149369  | 0.106369902 | 1.489232954  | 0.00248440   |             |

|            |              |              |             |              |             |             |
|------------|--------------|--------------|-------------|--------------|-------------|-------------|
| ITG43      | 3808.39591   | 0.945804377  | 0.27109920  | 3.48877493   | 0.00048524  | 0.005139256 |
| SSR2       | 6183.50969   | 0.489486827  | 0.14035283  | 3.48754506   | 0.000487477 | 0.005160088 |
| TOMM4      | 1727.257428  | 0.6979272    | 0.200146375 | 1.487311171  | 0.000487903 | 0.005161623 |
| EMC3       | 756.5979144  | 0.539835768  | 0.154835619 | 1.486508935  | 0.000489369 | 0.005174172 |
| TRM27      | 2306.141817  | 0.268139314  | 0.076932529 | 3.485257626  | 0.000491663 | 0.005195445 |
| YEAT54     | 744.8552476  | -0.738276188 | 0.211857927 | -3.484470185 | 0.00049256  | 0.005201941 |
| ZDFX12     | 1188.582417  | 0.656820711  | 0.188509916 | 3.484276721  | 0.000493469 | 0.005208357 |
| HLA-DOB    | 84.65066266  | -0.891756324 | 0.255966028 | -3.483885469 | 0.000494191 | 0.005213194 |
| TMMBA      | 292.8052879  | 0.622495602  | 0.178692456 | 3.483614833  | 0.000494691 | 0.005215479 |
| GRINA      | 16414.36557  | 0.454648371  | 0.130560685 | 3.482276248  | 0.000497171 | 0.005232642 |
| CAWIN3     | 588.411681   | 0.847899152  | 0.243463959 | 3.482277854  | 0.000497168 | 0.005232642 |
| FAMOA      | 6284.256279  | 0.723151347  | 0.20765134  | 3.482526755  | 0.000496706 | 0.005232642 |
| ARHGFE35   | 38.44509888  | 1.621890929  | 0.465979124 | 3.480608566  | 0.000500276 | 0.005262321 |
| ATP5F1D    | 7481.66677   | 0.781937754  | 0.224688447 | 3.480097729  | 0.000501231 | 0.005269358 |
| COLQ       | 382.3467209  | 0.52574561   | 0.151031903 | 3.479891681  | 0.000501617 | 0.005270406 |
| GREB7      | 2716.797307  | -0.509895583 | 0.146549299 | -3.479345084 | 0.000502641 | 0.005276253 |
| AL031777.3 | 20.5524183   | 1.427566682  | 0.413178259 | 1.479289213  | 0.000502745 | 0.005276253 |
| ZNF333     | 969.2556438  | -0.383839531 | 0.110338819 | -3.478735404 | 0.000503786 | 0.005280945 |
| PAQR6      | 31405.28844  | -0.992161363 | 0.282531599 | -3.478441236 | 0.000504339 | 0.005280945 |
| SYCE3      | 80.27981304  | 1.207731989  | 0.347204201 | 3.478448666  | 0.000504325 | 0.005280945 |
| TRMT10C    | 716.1582316  | 0.378290804  | 0.108738717 | 3.47889708   | 0.000503482 | 0.005280945 |
| SIK1B      | 1156.451094  | 1.006136388  | 0.289320022 | 3.477589907  | 0.000505943 | 0.005294736 |
| USP40      | 2581.489352  | -0.343819872 | 0.098877115 | -3.477244176 | 0.000506596 | 0.00529856  |
| BARA       | 1842.495689  | 0.66457767   | 0.191162458 | 3.476507241  | 0.000507991 | 0.005310129 |
| SLC3F2     | 530.2313881  | 0.600004999  | 0.172603271 | 3.476208719  | 0.000508556 | 0.00531303  |
| ASPA       | 4475.639301  | -0.873701641 | 0.251383687 | -3.475570157 | 0.000509769 | 0.00532678  |
| CORO2B     | 7045.466358  | -0.504532753 | 0.145192714 | -3.474917851 | 0.000511011 | 0.005326177 |
| PHACT3     | 3483.29878   | -0.725194517 | 0.208710986 | -3.47463503  | 0.000511549 | 0.005326177 |
| HSD17B10   | 3598.52671   | 0.573155605  | 0.165523941 | 3.474757803  | 0.000511315 | 0.005326177 |
| ERP        | 1023.220997  | 0.540032669  | 0.155414559 | 3.474788215  | 0.000511257 | 0.005326177 |
| ING2       | 629.8895288  | 0.460169642  | 0.132414424 | 3.475222928  | 0.000510429 | 0.005326177 |
| ZNF697     | 242.7410911  | 0.890282444  | 0.256234743 | 3.474479818  | 0.000511845 | 0.00532625  |
| GCH1       | 256.7690422  | 0.877224591  | 0.252497865 | 3.474186176  | 0.000512405 | 0.005329074 |
| DGCR6L     | 3320.553523  | 0.503610163  | 0.145088394 | 3.471057542  | 0.000518413 | 0.005385474 |
| LINC01556  | 6.646071821  | 1.451390016  | 0.41922833  | 3.471115565  | 0.000518301 | 0.005385474 |
| CYBA       | 9960.838628  | 1.000171248  | 0.288198839 | 3.47042081   | 0.000519644 | 0.005395217 |
| IKZF4      | 786.0507544  | -0.462058621 | 0.133184555 | -3.469310969 | 0.000521795 | 0.00541293  |
| ATP6V1G1   | 4134.589493  | 0.524435015  | 0.151167208 | 3.469237958  | 0.000521937 | 0.00541293  |
| P2RY12     | 864.5026935  | -1.319753588 | 0.380493571 | -3.468530572 | 0.000523313 | 0.005424148 |
| CSN2B      | 6829.947386  | 0.505866574  | 0.145876368 | 3.467776152  | 0.000524784 | 0.00543634  |
| ZNF546     | 282.2596453  | -0.474811582 | 0.136936141 | -3.467394195 | 0.000525531 | 0.005441013 |
| ZFP3       | 194.9400527  | 0.914014513  | 0.263618399 | 3.467187946  | 0.000525934 | 0.005442132 |
| NRPLN3     | 307.2974407  | 0.811814008  | 0.23416740  | 3.466810177  | 0.000526678 | 0.005446728 |
| DNM2       | 9185.712619  | -0.382114167 | 0.110233208 | -3.466416163 | 0.000527446 | 0.005451658 |
| CLAVL2     | 172.0112278  | 0.499541443  | 0.144120212 | 3.466144238  | 0.00052798  | 0.005454116 |
| SLC16A5    | 168.9371292  | 0.848135495  | 0.244718903 | 3.465753916  | 0.000528747 | 0.005458979 |
| FNBP1      | 6922.513644  | -0.564178219 | 0.162889724 | -3.463559306 | 0.000533079 | 0.005499095 |
| ETF1       | 4298.160272  | 0.270942184  | 0.078228225 | 3.463483737  | 0.000533229 | 0.005499095 |
| TPDZL2     | 7180.1117377 | 0.322793226  | 0.092210613 | 3.463052791  | 0.000534085 | 0.005504833 |
| ENTPD6     | 4839.845411  | 0.381893117  | 0.110384816 | 3.459652615  | 0.000540873 | 0.005571684 |
| PSM9       | 2322.923271  | 0.4362735    | 0.126157494 | 3.458165548  | 0.000543867 | 0.0055994   |
| DDX6       | 743.5741224  | -0.614206001 | 0.177620269 | -3.457972478 | 0.000544257 | 0.005600235 |
| WWC1       | 2863.189669  | -0.478923171 | 0.138904186 | -3.45782452  | 0.000544556 | 0.005600235 |
| GAST       | 11.02884014  | 1.612869321  | 0.466486111 | 3.457482666  | 0.000545424 | 0.005604143 |
| GGT1       | 1497.861601  | 0.801435426  | 0.231850292 | 3.456693618  | 0.000546846 | 0.005617519 |
| KRC1       | 1719.952637  | -0.442842101 | 0.128155658 | -3.45550176  | 0.000549277 | 0.005639271 |
| NRBF2      | 893.1360771  | 0.455110793  | 0.131173715 | 3.455039619  | 0.000550212 | 0.005643658 |
| OSV1L32    | 31.44468924  | 0.852333382  | 0.246690169 | 3.455076408  | 0.000550137 | 0.005642658 |
| TEPP       | 85.68154133  | 0.939088244  | 0.277698050 | 3.453701258  | 0.000552945 | 0.005666731 |
| MM12B      | 8196.644598  | -0.686880924 | 0.198927668 | -3.452918133 | 0.000554557 | 0.005666731 |
| SMPD3B     | 29.85116124  | 1.279899295  | 0.370674004 | 3.452897375  | 0.00055466  | 0.005666731 |
| CKOR3      | 11.69291588  | 1.941804593  | 0.562345441 | 3.453045855  | 0.000554295 | 0.005666731 |
| TMEM263    | 1427.070554  | 0.402927994  | 0.116678773 | 3.45331017   | 0.000553752 | 0.005666731 |
| ISCU       | 6551.978493  | 0.507258159  | 0.146886133 | 3.453410812  | 0.000553545 | 0.005666731 |
| HDAC9      | 750.8568274  | -0.56556122  | 0.163860906 | -3.451471132 | 0.000557539 | 0.005689306 |
| UBTD1      | 1356.738552  | 0.462023757  | 0.133861862 | 3.451496565  | 0.000557487 | 0.005689306 |
| S100A13    | 6732.740125  | 0.743521997  | 0.215412929 | 3.451612679  | 0.000557247 | 0.005689306 |
| GABRB2     | 938.990664   | -0.395927256 | 0.114734711 | -3.451202839 | 0.000558094 | 0.005691817 |
| KT12       | 458.203229   | 0.453393278  | 0.131407391 | 3.450287484  | 0.00055999  | 0.005707994 |
| STX11      | 74.15268902  | -0.905801164 | 0.262567934 | -3.449778305 | 0.000561047 | 0.005712533 |
| IGF1A4     | 5315.99369   | 0.66135589   | 0.191709904 | 3.449774423  | 0.000561055 | 0.005712533 |
| STAG3      | 385.0913138  | 0.464657222  | 0.134705321 | 3.44943481   | 0.000561761 | 0.005714868 |
| DDI1       | 3441.81861   | 0.35970324   | 0.104281002 | 3.449369564  | 0.000561905 | 0.005714868 |
| USP6       | 323.9639364  | -0.586595519 | 0.170076439 | -3.448999798 | 0.000562668 | 0.005719477 |
| TMEM63     | 656.2434509  | 0.459495193  | 0.133249568 | 3.448380336  | 0.000563959 | 0.00572944  |
| SLC25A39   | 6336.426897  | 0.487544221  | 0.141400013 | 3.447978624  | 0.000564799 | 0.005734808 |
| NRNRNPA81  | 23417.82647  | -0.31539293  | 0.091476968 | -3.447785132 | 0.000565203 | 0.005735757 |
| RCD3       | 1849.33662   | -0.350007828 | 0.101525931 | -3.447472244 | 0.000565859 | 0.005736542 |
| TPS313     | 2525.254501  | 0.597862507  | 0.173421619 | 3.447450851  | 0.000565903 | 0.005736542 |
| FAN1       | 1786.272027  | -0.39480153  | 0.114535011 | -3.446947999 | 0.000566861 | 0.005743086 |
| FCHD2      | 2265.750712  | -0.536551268 | 0.155692494 | -3.446224381 | 0.000568478 | 0.00575631  |
| SOAT1      | 2182.069544  | 0.671305699  | 0.194824984 | 3.44566031   | 0.00056978  | 0.005756838 |
| NRPL4      | 3063.058331  | 0.522133128  | 0.15153325  | 3.445667048  | 0.000569652 | 0.005756838 |
| MRP5       | 2123.325013  | 0.337061101  | 0.097818497 | 3.445780929  | 0.000569412 | 0.005756838 |
| RUM2       | 704.0321686  | 0.510742945  | 0.148211841 | 3.446010209  | 0.000568929 | 0.005756838 |
| CD2        | 2894.927987  | -0.869991972 | 0.252637975 | -3.444994645 | 0.000571071 | 0.005766719 |
| PBAL       | 2583.420363  | 0.58733627   | 0.170517894 | 3.444426202  | 0.000572273 | 0.005775697 |
| RBM8A      | 5622.280068  | 0.319733527  | 0.092830594 | 3.444254049  | 0.000572637 | 0.005776205 |
| YIPF2      | 1808.112456  | 0.430281067  | 0.124974818 | 3.443024779  | 0.000575247 | 0.005799354 |
| PPP1R12B   | 2883.727014  | -0.607262404 | 0.176405549 | -3.442422337 | 0.000576529 | 0.005805934 |
| STOML2     | 3006.548427  | 0.363034058  | 0.104662445 | 3.442534304  | 0.000576291 | 0.005805934 |
| LINC       | 371.3883624  | 0.686037034  | 0.199315699 | 3.441961853  | 0.000577512 | 0.00581265  |
| ATP10B     | 1596.040566  | -0.894450577 | 0.259931905 | -3.441107084 | 0.000579339 | 0.005827861 |
| MARVELD1   | 1328.051488  | 0.871577607  | 0.25326204  | 3.440536971  | 0.000580661 | 0.005838967 |
| ACD12651.1 | 299.6441842  | -0.934671794 | 0.271707389 | -3.439994025 | 0.000581727 | 0.0058453   |
| ATP9AP2    | 7438.256829  | 0.335472474  | 0.097531915 | 3.439617434  | 0.000582537 | 0.005850449 |
| NTM        | 3790.951588  | -0.89464416  | 0.260227343 | -3.4380108   | 0.000586004 | 0.005882066 |
| SEEMAD     | 11660.48707  | -0.859358883 | 0.250025236 | -3.437088577 | 0.000588003 | 0.005898602 |
| AIN14      | 726.7198026  | 0.799959883  | 0.221767931 | 3.436955698  | 0.000588293 | 0.005898602 |
| ITPKC      | 2150.405297  | 0.690470395  | 0.200930501 | 3.436363044  | 0.00058958  | 0.005908307 |
| GNL2       | 1917.445894  | 0.444785795  | 0.129476376 | 3.435266038  | 0.000591972 | 0.005924904 |
| NOP56      | 5916.812831  | 0.468827068  | 0.136528848 | 3.433904779  | 0.000594953 | 0.005955672 |
| USS        | 7324.049689  | -0.447528485 | 0.130338669 | -3.433581273 | 0.000595664 | 0.005959546 |
| ADCK5      | 567.2406387  | 0.53592846   | 0.156196794 | 3.431110496  | 0.000601116 | 0.006010831 |
| MAP4K4     | 27748.4543   | -0.644873384 | 0.18798114  | -3.430521717 | 0.000602422 | 0.006020624 |
| NACC1      | 5980.255732  | 0.302113334  | 0.088071042 | 3.430336771  | 0.000602833 | 0.006021464 |
| H63S72     | 808.9626988  | 1.20993265   | 0.356014925 | 3.429612582  | 0.000604444 | 0.006034286 |
| WSB1       | 11701.93597  | -0.542084132 | 0.158110609 | -3.428512074 | 0.00060609  | 0.006052247 |
| B3GNT2     | 655.5318817  | 0.627057596  | 0.182893984 | 3.428530458  | 0.000606858 | 0.006052247 |
| LEN6B      | 18420.29521  | -0.392017304 | 0.114351081 | -3.428190613 | 0.000607619 | 0.006056141 |
| HMAD       | 448.5057524  | 0.935080015  | 0.272825642 | 3.427423491  | 0.000609338 | 0.006063439 |
| ITRH1      | 111.0461408  | 0.876786653  | 0.255811139 | 3.427476566  | 0.000609219 | 0.006063439 |
| IL7B       | 508.6229003  | 1.450881305  | 0.423233762 | 3.427611277  | 0.000608914 | 0.006063439 |
| GLDN2      | 129.5681182  | 0.786380401  |             |              |             |             |

|          |             |              |             |              |             |             |
|----------|-------------|--------------|-------------|--------------|-------------|-------------|
| WAPP     | 2712.824341 | 0.403164125  | 0.117691449 | 3.425524111  | 0.000613614 | 0.006097839 |
| CC34     | 3873.894680 | 0.510815914  | 0.149154926 | 3.424733782  | 0.000615402 | 0.006107294 |
| ADCF1    | 8553.900079 | 0.355834226  | 0.103913605 | 3.424232672  | 0.000616321 | 0.006109829 |
| EIP1     | 34594.24351 | 0.351281551  | 0.102580707 | 3.424441033  | 0.000616066 | 0.006109829 |
| RABG GTA | 1569.510764 | 0.46220272   | 0.135014429 | 3.423357955  | 0.000618526 | 0.006123892 |
| YKTE     | 7807.191647 | 0.40035306   | 0.116958104 | 3.423046772  | 0.000619234 | 0.006132116 |
| PSMB10   | 3345.59749  | 0.72305598   | 0.211262556 | 3.422546779  | 0.000620374 | 0.00613681  |
| NF5B3    | 1184.067479 | 0.566798846  | 0.165605459 | 3.422585515  | 0.000620286 | 0.00613681  |
| NO16     | 2572.773837 | 0.479796592  | 0.140207987 | 3.422034666  | 0.000621544 | 0.006141787 |
| ARAF     | 2862.573861 | 0.441700406  | 0.129072548 | 3.422109597  | 0.000621373 | 0.006141787 |
| CC20B    | 51.66942333 | -0.858653131 | 0.250935257 | -3.421811424 | 0.000622054 | 0.006143231 |
| NO17     | 2514.064833 | 0.239544786  | 0.070007959 | 3.421679317  | 0.000622357 | 0.006143231 |
| ORGO K1  | 5648.701332 | 0.55025094   | 0.160836535 | 3.421180633  | 0.000623499 | 0.006151212 |
| MWCI1    | 101.90438   | 0.843106102  | 0.246488499 | 3.420468563  | 0.000625134 | 0.006164038 |
| DMAN1    | 1515.577803 | 0.482938333  | 0.141253213 | 3.418954008  | 0.000626823 | 0.00619512  |
| SLLC2A15 | 1252.161972 | -0.72139995  | 0.210878921 | -3.418540408 | 0.00062958  | 0.006202242 |
| PRKF82   | 2617.423589 | -0.5053885   | 0.147896062 | -3.418201647 | 0.000630364 | 0.006202341 |
| TBPC1    | 757.7952873 | -0.515688854 | 0.150865554 | -3.418201439 | 0.000630364 | 0.006202341 |
| MVCH     | 244.8363937 | -0.889800854 | 0.260347177 | -3.417747238 | 0.000631417 | 0.006209384 |
| Clor216  | 2976.758585 | 0.477633441  | 0.139823218 | 3.415980884  | 0.000635527 | 0.006246469 |
| NSL1     | 1743.770333 | -0.409915333 | 0.120019327 | -3.415411018 | 0.000636858 | 0.006256217 |
| LRCM     | 570.5676511 | -0.512654897 | 0.150129793 | -3.414744583 | 0.000638418 | 0.00625963  |
| PRK01    | 528.5824264 | -0.647378344 | 0.189583892 | -3.41473285  | 0.000638446 | 0.00625963  |
| CLEC17A  | 34.86512667 | -1.221382677 | 0.357685598 | -3.414682286 | 0.000638564 | 0.00625963  |
| SNRFB    | 4241.0719   | 0.610122277  | 0.178657284 | 3.41504283   | 0.00063772  | 0.00625963  |
| SIGLEC7  | 550.7197979 | 1.032308566  | 0.302440566 | 3.413295909  | 0.000641907 | 0.00628905  |
| BTN3A3   | 1467.258188 | -0.434588038 | 0.17390395  | -3.411475353 | 0.000646123 | 0.006323759 |
| BLCAP    | 5322.42871  | 0.423399543  | 0.124110584 | 3.411470101  | 0.000646136 | 0.006323759 |
| ZNFT9    | 307.206641  | 0.476084123  | 0.120591116 | 3.410565689  | 0.000648295 | 0.006341518 |
| USP50    | 6.144262682 | -1.402839529 | 0.413213725 | -3.409469209 | 0.000650893 | 0.006363363 |
| CDC42EP5 | 159.6930833 | 0.928846993  | 0.272474935 | 3.408926264  | 0.000652191 | 0.006372868 |
| LAMTOR4  | 7422.308348 | 0.785773575  | 0.230562988 | 3.408064684  | 0.000654254 | 0.006389636 |
| PNLIP    | 3.322693848 | -3.809549431 | 1.117857582 | -3.407902305 | 0.000654643 | 0.006390054 |
| AGAP5    | 316.4779263 | -0.47533444  | 0.139488993 | -3.407686794 | 0.00065516  | 0.006391717 |
| SNRPE    | 1683.585337 | 0.478241958  | 0.140450738 | 3.40505122   | 0.000661516 | 0.006450331 |
| CLEC9A   | 44.0790602  | -1.389573226 | 0.408171163 | -3.404388536 | 0.000663124 | 0.006459311 |
| SLLC3A3  | 2524.568974 | 0.5847345    | 0.171793991 | 3.404381547  | 0.000663141 | 0.006459311 |
| NRP144   | 1313.168447 | 0.37785656   | 0.110993148 | 3.40368484   | 0.000664834 | 0.00646897  |
| NUAK2    | 366.652725  | 0.637927249  | 0.187419559 | 3.403738365  | 0.000664704 | 0.00646897  |
| ZNF79    | 1583.351288 | 0.55103281   | 0.161911382 | 3.403332134  | 0.000665693 | 0.006473905 |
| PINLYP   | 776.5564476 | 0.474574899  | 0.139454473 | 3.403081216  | 0.000666305 | 0.00647644  |
| MEFV     | 82.9365512  | 0.993707053  | 0.2920215   | 3.402855798  | 0.000666855 | 0.00647368  |
| CSMD2    | 724.3515574 | -0.879403373 | 0.258473644 | -3.402315053 | 0.000668176 | 0.006487781 |
| TIME09   | 5703.072838 | 0.505274807  | 0.148541949 | 3.401563058  | 0.000670017 | 0.006502233 |
| TU8B8    | 2920.450292 | 0.895163717  | 0.26319792  | 3.401109995  | 0.000671128 | 0.006506166 |
| SPS82    | 578.4353463 | 0.582193764  | 0.171173763 | 3.401188396  | 0.000670936 | 0.006506166 |
| GP2      | 5.318112153 | -1.147042288 | 0.337299972 | -3.400669303 | 0.000672236 | 0.006513475 |
| AZIN2    | 1647.078902 | -0.615020841 | 0.180885331 | -3.400059249 | 0.000673713 | 0.006524355 |
| EFEMP2   | 3640.789222 | 0.529775423  | 0.155833111 | 3.399633248  | 0.000674763 | 0.006531096 |
| BOP1     | 2429.690363 | 0.633343234  | 0.192194088 | 3.399385559  | 0.000675374 | 0.006533382 |
| HGD2A    | 3457.62074  | 0.460696982  | 0.135608798 | 3.39919671   | 0.000675841 | 0.006534663 |
| TBL3     | 2247.017272 | 0.504598686  | 0.148467759 | 3.398708855  | 0.000677047 | 0.006542899 |
| EVA      | 7303.889664 | -0.399471318 | 0.117542591 | -3.398524014 | 0.000677505 | 0.006543554 |
| GF2F2E   | 749.2895152 | 0.307406125  | 0.090456274 | 3.398394735  | 0.000677825 | 0.006543554 |
| FAM21A   | 725.5870334 | -0.540334853 | 0.159019741 | -3.397910546 | 0.000679026 | 0.00654616  |
| NXF5     | 14.93544612 | -1.452769001 | 0.427568699 | -3.397754238 | 0.000679486 | 0.00654616  |
| TARBP2   | 1276.852169 | 0.41269945   | 0.121463809 | 3.397711109  | 0.000679516 | 0.00654616  |
| CDP      | 191.242927  | 1.131771369  | 0.333069998 | 3.397998545  | 0.000678808 | 0.00654616  |
| ELMOD3   | 1152.184213 | -0.23851892  | 0.102570651 | -3.395842185 | 0.000684178 | 0.006587626 |
| CTBT7    | 809.036698  | 0.532540945  | 0.15685802  | 3.395077152  | 0.000686093 | 0.006602612 |
| CBDOOF   | 583.470386  | 1.072810808  | 0.316097726 | 3.393921307  | 0.000688995 | 0.006627081 |
| CHCD6    | 1378.368309 | 0.614609791  | 0.181104374 | 3.393677234  | 0.000689609 | 0.006629529 |
| STX16    | 5816.443964 | -0.420900094 | 0.124043433 | -3.393167037 | 0.000690895 | 0.006638427 |
| HERC2    | 4566.224516 | -0.450933608 | 0.132901839 | -3.392982442 | 0.000691361 | 0.00663944  |
| CEP162   | 410.9218704 | -0.485880446 | 0.1432471   | -3.391904245 | 0.000694087 | 0.00666212  |
| DENND5A  | 10227.81841 | -0.477315658 | 0.140731798 | -3.391668858 | 0.000694683 | 0.006664404 |
| Cl8orf21 | 737.2651201 | 0.419790033  | 0.123791486 | 3.391105853  | 0.000695612 | 0.006674636 |
| TNEM1B5A | 1059.634631 | 0.240041625  | 0.070795419 | 3.390637831  | 0.000697302 | 0.006682566 |
| NCKOPL1  | 2164.712339 | -0.2526992   | 0.074536602 | -3.390269941 | 0.000698238 | 0.006688243 |
| NRL5     | 1458.832564 | 0.645133883  | 0.189225852 | 3.390207115  | 0.000698411 | 0.006688243 |
| DMD4     | 1201739699  | -1.515186863 | 0.446070821 | -3.389021563 | 0.000699175 | 0.006688812 |
| FRMD9    | 2033.05541  | -0.677482915 | 0.199858556 | -3.389811924 | 0.000699406 | 0.006688812 |
| NRP19    | 2118.292727 | 0.364637641  | 0.107610605 | 3.388491869  | 0.000702782 | 0.006717615 |
| ABT1     | 1041.758771 | 0.433170952  | 0.127850646 | 3.388101386  | 0.000703782 | 0.006723694 |
| ZXOC     | 1371.300131 | -0.295409588 | 0.087245266 | -3.385966969 | 0.000709279 | 0.006770305 |
| WIPI2    | 5247.527483 | 0.257335083  | 0.076007862 | 3.38563769   | 0.000710131 | 0.006770305 |
| CDC32    | 1134.647538 | 0.349403381  | 0.1031975   | 3.385773696  | 0.000709779 | 0.006770305 |
| TAF12    | 890.505403  | 0.371670659  | 0.109771634 | 3.385853403  | 0.000709573 | 0.006770305 |
| PNP0     | 2858.503056 | 0.428773866  | 0.126697813 | 3.384224674  | 0.000713796 | 0.006801727 |
| AK9      | 435.4849208 | -0.576220587 | 0.170296907 | -3.383639426 | 0.000715319 | 0.006809669 |
| TNEM60   | 712.754667  | 0.398412361  | 0.117747355 | 3.38362047   | 0.000715368 | 0.006809669 |
| CPAF     | 186.7122348 | 1.318366971  | 0.389796097 | 3.382196436  | 0.000719087 | 0.006841536 |
| EP5B2    | 1968.938757 | 0.796349254  | 0.223653752 | 3.381786566  | 0.000720161 | 0.006844684 |
| TUSC1    | 1179.474411 | 0.395381951  | 0.116010892 | 3.3819086    | 0.000719841 | 0.006844684 |
| BCAS1    | 37561.41635 | -0.897990707 | 0.264091337 | -3.381319493 | 0.000721386 | 0.006849266 |
| BRAS3    | 504.6230782 | 0.824517408  | 0.243843669 | 3.381336133  | 0.000721342 | 0.006849266 |
| MEB4     | 1774.03927  | -0.424099267 | 0.12544258  | -3.380896604 | 0.000722602 | 0.006857281 |
| PPRC1    | 1369.788102 | 0.361740542  | 0.107006159 | 3.380558145  | 0.000723388 | 0.0068612   |
| ARRC2    | 8304.893679 | -0.637164897 | 0.188510106 | -3.380003916 | 0.000724848 | 0.006866625 |
| DUSP15   | 1468.070016 | 0.737474349  | 0.218189089 | 3.379978134  | 0.000724916 | 0.006866625 |
| SNX29    | 1951.457807 | -0.610419589 | 0.180612782 | -3.379714221 | 0.000725612 | 0.006871691 |
| GCCI     | 1052.919372 | 0.306881388  | 0.090809138 | 3.379410855  | 0.000726414 | 0.006875745 |
| TARBP1   | 2221.161299 | -0.559216756 | 0.165509612 | -3.378756972 | 0.000728143 | 0.006888581 |
| ZFPM1    | 1172.543424 | 0.645229459  | 0.191010482 | 3.377979333  | 0.000730206 | 0.006904546 |
| NI02     | 506.2509588 | -0.979074531 | 0.290016626 | -3.375925532 | 0.000735678 | 0.006945602 |
| CLON7    | 142.7362776 | 0.935994026  | 0.277253664 | 3.375948268  | 0.000735617 | 0.006945602 |
| RABAC1   | 5528.705127 | 0.610855152  | 0.180934488 | 3.376112314  | 0.000735179 | 0.006945602 |
| TNEM26   | 114.7746661 | 1.108780514  | 0.328459316 | 3.375701223  | 0.000736278 | 0.006947707 |
| FRSG     | 12343.98999 | 0.594375383  | 0.176084338 | 3.375514783  | 0.000737677 | 0.006948859 |
| TPM2     | 6115.784122 | 1.023826711  | 0.303414446 | 3.374330779  | 0.000739901 | 0.006974747 |
| RCC1L    | 2225.358697 | 0.399787225  | 0.116743894 | 3.373092026  | 0.000743291 | 0.007003124 |
| BS2      | 5219.875556 | -0.419116705 | 0.12429256  | -3.372017633 | 0.000746197 | 0.007023319 |
| GNNA15   | 686.8454393 | 0.79836364   | 0.236743507 | 3.3721573    | 0.000745818 | 0.007023319 |
| NFYB     | 2041.35221  | -0.429303384 | 0.127336361 | -3.371412391 | 0.000747838 | 0.007035176 |
| CTS8     | 68766.11169 | 0.787648875  | 0.233644823 | 3.37113772   | 0.000748584 | 0.007038602 |
| SUPT20H  | 1277.090242 | -0.332778778 | 0.098750335 | -3.369900244 | 0.000751954 | 0.00706668  |
| ADMTS18  | 442.6951678 | -1.35042501  | 0.400758641 | -3.369671594 | 0.000752578 | 0.007068941 |
| TWIST1NB | 849.0319223 | 0.263103979  | 0.078088207 | 3.369317728  | 0.000753545 | 0.007070418 |
| TRMF61A  | 2385.269784 | 0.530769027  | 0.157553544 | 3.368816802  | 0.000754916 | 0.007083678 |
| FHT      | 496.4218819 | -0.867992694 | 0.257743397 | -3.36766219  | 0.000758084 | 0.007095049 |
| CCDC190  | 45.15919657 | -1.186438811 | 0.352331477 | -3.367393747 | 0.000758823 | 0.007095049 |
| SPINK6   | 958683824   | 1.946340022  | 0.577960168 | 3.367425365  | 0.000758725 | 0.007095049 |
| FLPP5    | 1238.583803 | 0.427714638  | 0.127014097 | 3.367458007  | 0.000758646 | 0.007095049 |
| NAUC9    | 12.97833003 | 2.21029998   | 0.659629677 | 3.367596752  | 0.000758264 | 0.0070      |



|           |             |              |             |               |             |             |
|-----------|-------------|--------------|-------------|---------------|-------------|-------------|
| ART74     | 4.062417561 | -2.061914671 | 0.612517468 | -3.366295207  | 0.000761851 | 0.007116144 |
| CHP7      | 7143.216872 | 0.699980899  | 0.207915966 | 3.36630711    | 0.000761818 | 0.007116144 |
| PSME3     | 8917.256456 | 0.275476461  | 0.081840382 | 1.366021202   | 0.000762608 | 0.007119611 |
| ACVRL1    | 1383.508675 | 0.736692516  | 0.218898684 | 1.365449728   | 0.000764159 | 0.007130762 |
| NOSIP     | 3730.444441 | 0.690613977  | 0.205247105 | 3.364792773   | 0.000766012 | 0.007144144 |
| FXN       | 619.2683462 | 0.36758866   | 0.109251994 | 3.364594529   | 0.000766562 | 0.007145663 |
| NPHF4     | 797.1791913 | -0.599646223 | 0.178248377 | -3.364104817  | 0.000767924 | 0.007154733 |
| CTSE      | 1.505925928 | 2.142294091  | 0.637032101 | 3.36292957    | 0.0007712   | 0.007178006 |
| ELMVD3    | 165.4423266 | 0.656550479  | 0.195224148 | 3.363059775   | 0.000770837 | 0.007178006 |
| EM1       | 1198.278977 | -0.455474239 | 0.135451602 | -3.362634553  | 0.000772025 | 0.007182053 |
| PEF1      | 4263.938291 | 0.418923415  | 0.124596232 | 3.362247865   | 0.000773107 | 0.007188459 |
| NRMQ      | 1418.369734 | 0.331867258  | 0.098793954 | 3.361029829   | 0.000776524 | 0.007216625 |
| FAM98     | 3861.558167 | -0.393836344 | 0.117208462 | -3.360335758  | 0.000779042 | 0.007233864 |
| DYNL13    | 1842.141468 | 0.496526247  | 0.14777161  | 3.360092283   | 0.000779164 | 0.007233864 |
| UBF2      | 1835.319467 | -0.333669771 | 0.099313973 | -3.359745498  | 0.00078014  | 0.007239109 |
| GCDC127   | 1635.225052 | 0.207888478  | 0.061878683 | 3.359613817   | 0.000780515 | 0.007239109 |
| AFMD      | 2861.404661 | -0.614678694 | 0.183013231 | -3.358865714  | 0.000783222 | 0.007252263 |
| GPRL32    | 284.0705353 | 0.928561166  | 0.276458836 | 1.358768273   | 0.000782507 | 0.007252263 |
| SPINK1    | 73.54755948 | 1.671516408  | 0.497655234 | 3.358783939   | 0.000782863 | 0.007252263 |
| KMD       | 185.6372578 | 0.996735284  | 0.296845465 | 3.357758167   | 0.000785773 | 0.007265939 |
| GEMN6     | 554.5341048 | 0.344694175  | 0.102652723 | 3.357866684   | 0.000785464 | 0.007265939 |
| RPP38     | 539.7145404 | 0.399993162  | 0.119118116 | 3.357954009   | 0.000785217 | 0.007265939 |
| PO11      | 925.0065624 | -0.424755026 | 0.126531966 | -3.356898957  | 0.000788219 | 0.0072849   |
| IUSP4     | 534.5803737 | 1.007641749  | 0.300278602 | 3.355689489   | 0.000791674 | 0.007313163 |
| CBR3      | 675.7420951 | 0.546406806  | 0.162852914 | 3.355216641   | 0.000793029 | 0.007318339 |
| NMPK2     | 8917.714974 | 0.547242211  | 0.161795918 | 3.355315935   | 0.000792744 | 0.007318339 |
| NRN11     | 3094.956682 | -0.35357419  | 0.105390585 | -3.354893501  | 0.000793955 | 0.007323226 |
| MRZ9      | 8712.339172 | 0.462747254  | 0.137950433 | 3.354445877   | 0.000795241 | 0.007331415 |
| CPD3      | 3787.631301 | 0.842177131  | 0.251088166 | 3.354100213   | 0.000795209 | 0.00733667  |
| IRF3      | 3102.585202 | 0.469831369  | 0.140048159 | 3.353356252   | 0.000798379 | 0.007352984 |
| PLGG2     | 2832.143964 | 0.789277312  | 0.235399926 | 3.352920819   | 0.000799636 | 0.007366883 |
| PSM86     | 5305.912438 | 0.477898025  | 0.142552742 | 3.352323637   | 0.000801363 | 0.007373098 |
| TIA1      | 2843.480052 | -0.467192099 | 0.139432444 | -3.350669951  | 0.000806163 | 0.007413564 |
| NDOUFA13  | 14383.03953 | 0.711213824  | 0.212269963 | 3.350515624   | 0.000806613 | 0.007413997 |
| USP16     | 2329.591502 | -0.322180929 | 0.096171442 | -3.350068628  | 0.000807915 | 0.007420599 |
| PMW       | 3416.862079 | 0.595748256  | 0.177835676 | 3.349929242   | 0.000808136 | 0.007420599 |
| CLBA1     | 898.3170222 | 0.488271925  | 0.145760367 | 3.349826399   | 0.000808622 | 0.007421364 |
| SRGAP2C   | 1756.441866 | -0.598835877 | 0.178776488 | -3.349634402  | 0.000809183 | 0.007422813 |
| BARRES2   | 2267.558617 | 0.803423488  | 0.239867962 | 3.349440591   | 0.000809749 | 0.007424312 |
| PTPRK     | 2749.744138 | -0.545855345 | 0.163029581 | -3.34819817   | 0.000811388 | 0.007453969 |
| FAM8C1    | 284.4024002 | 0.569217774  | 0.170014918 | 3.348046005   | 0.000813835 | 0.007454355 |
| RPLP0     | 47340.76461 | 0.525633167  | 0.157023494 | 3.347481027   | 0.000815496 | 0.007465857 |
| SRM       | 4193.756382 | 0.572597004  | 0.171139363 | 3.345793958   | 0.000820473 | 0.007507698 |
| UBE2Q1    | 3899.248242 | 0.379607969  | 0.113498997 | 3.344593954   | 0.000824011 | 0.007532773 |
| GPML43    | 293.6257831 | 0.832385645  | 0.248863753 | 3.344664043   | 0.000823823 | 0.007532773 |
| CST3      | 126355.9074 | 0.272263502  | 0.217468854 | 3.344219129   | 0.000825145 | 0.007539216 |
| DOCK9     | 4113.463964 | -0.801392898 | 0.239676657 | -3.343641843  | 0.000826864 | 0.007542216 |
| FCHO1     | 2388.977753 | -0.604709791 | 0.180858109 | -3.343599182  | 0.000827111 | 0.007542216 |
| TPBG      | 468.9770781 | 0.952650689  | 0.285988688 | 3.343701082   | 0.000826688 | 0.007542216 |
| PILRA     | 1114.936942 | 0.707816966  | 0.211615446 | 3.343881461   | 0.00082615  | 0.007542216 |
| KLHL3     | 823.7412581 | -0.738731851 | 0.221003003 | -3.342632644  | 0.000829877 | 0.007556223 |
| CC7       | 8559.353354 | 0.409687155  | 0.122596559 | 3.34275697    | 0.000829505 | 0.007556223 |
| DNAB1     | 9571.006133 | 0.572574649  | 0.171286876 | 3.342781789   | 0.000829431 | 0.007556223 |
| AFM1      | 1438.999813 | 0.368568684  | 0.110269407 | 3.342438264   | 0.000830458 | 0.007557785 |
| MFSD4C    | 1216.517999 | -0.391476544 | 0.117152728 | -3.34159136   | 0.000832996 | 0.007572703 |
| CLC2D     | 430.6875814 | -0.465008508 | 0.139162438 | -3.341480027  | 0.00083333  | 0.007572703 |
| TNFRSF1A  | 6328.585956 | 0.619028953  | 0.185244454 | 3.341683003   | 0.000833724 | 0.007572703 |
| GGG5      | 1253.77082  | -0.501204229 | 0.150086629 | -3.341213931  | 0.000834129 | 0.007576229 |
| ATRP      | 667.9475867 | 0.492725987  | 0.147494556 | 3.34063844    | 0.00083586  | 0.007588211 |
| RPS6C1    | 1735.445103 | -0.451810255 | 0.135255756 | -3.340414253  | 0.000836535 | 0.007590598 |
| PARL      | 1749.547211 | 0.342663187  | 0.10259275  | 3.340033164   | 0.000837684 | 0.007597281 |
| BCO2      | 320.9809529 | -0.47824436  | 0.143195845 | -3.33979215   | 0.000838411 | 0.007600137 |
| ZBTB14    | 901.5359583 | -0.394759976 | 0.118241598 | -3.338587971  | 0.000842054 | 0.007627459 |
| PPP1R35   | 1172.830848 | 0.509975747  | 0.152754936 | 3.338522217   | 0.000842253 | 0.007627459 |
| ZNFX17    | 1028.166034 | -0.573234858 | 0.171734129 | -3.337920428  | 0.000844079 | 0.007635782 |
| MTG2      | 1756.94009  | 0.352584875  | 0.105633599 | 3.337809912   | 0.000844415 | 0.007635782 |
| BAGAL11   | 2097.819935 | 0.730788069  | 0.218926379 | 3.338053978   | 0.000843674 | 0.007635782 |
| ACAD5     | 1874.195846 | 0.492362514  | 0.147543013 | 3.337077814   | 0.000846642 | 0.007652169 |
| NRV1      | 4882.877398 | -0.484892564 | 0.145319024 | -3.336745252  | 0.000847658 | 0.007653855 |
| RAB28     | 1142.91861  | -0.319935624 | 0.095882598 | -3.336744706  | 0.00084766  | 0.007653855 |
| NR6M      | 1910.309892 | -0.428309869 | 0.128408801 | -3.33551801   | 0.000851405 | 0.007683922 |
| GPLM      | 2.768816152 | -1.141298533 | 0.342213699 | -3.335046308  | 0.000852852 | 0.007693202 |
| EIF4G3    | 4357.245233 | -0.449621195 | 0.134830701 | -3.334709218  | 0.000853886 | 0.007694996 |
| PDLIM7    | 3835.732544 | 0.828574218  | 0.248464274 | 3.334782475   | 0.000853661 | 0.007694996 |
| NAVS      | 1435.153673 | -0.725865315 | 0.217730517 | -3.333778485  | 0.000856749 | 0.007715511 |
| PLIN4     | 616.8585818 | 0.983296151  | 0.294956676 | 3.333698686   | 0.000857    | 0.007715511 |
| PSM45     | 3121.288413 | 0.414259946  | 0.124289667 | 3.333038764   | 0.000859033 | 0.007722468 |
| PRK4      | 3089.227019 | 0.659957507  | 0.197890398 | 3.333145587   | 0.0008587   | 0.007722468 |
| SURF6     | 2858.556974 | 0.325375873  | 0.097613523 | 3.33307359    | 0.000858201 | 0.007722468 |
| RCE1      | 639.5497933 | 0.435597678  | 0.130703547 | 3.332715061   | 0.000860033 | 0.007733922 |
| RER1      | 6942.210066 | 0.329969153  | 0.09900708  | 3.332783409   | 0.000859818 | 0.007733922 |
| PDLIM2    | 1499.813874 | 0.442449552  | 0.132775111 | 3.33235218    | 0.000861235 | 0.007739983 |
| TNFRM7    | 568.6711388 | 0.970214979  | 0.291186398 | 3.331937842   | 0.000862435 | 0.007739983 |
| PLCH2     | 4378.672561 | -0.740121303 | 0.222179639 | -3.331184438  | 0.000864773 | 0.007751947 |
| AD2       | 5162.282349 | 0.803432054  | 0.241186499 | 3.331165135   | 0.000864833 | 0.007751947 |
| TRCK      | 1062.797252 | -0.502709265 | 0.150949809 | -3.330307405  | 0.000867502 | 0.007772088 |
| CEP44     | 555.7742733 | -0.492293227 | 0.147804665 | -3.329445219  | 0.000870191 | 0.0077924   |
| TRIM11    | 1263.788585 | 0.408969034  | 0.122843085 | 3.329198657   | 0.000870963 | 0.007795517 |
| EXOSC7    | 1046.248625 | 0.403912138  | 0.121330029 | 3.329036861   | 0.000871469 | 0.007796266 |
| CD8       | 13029.57244 | 0.91754257   | 0.275711435 | 3.327909012   | 0.000875004 | 0.007824093 |
| ARGAP19   | 743.760063  | -0.36583964  | 0.109956545 | -3.327129275  | 0.000877457 | 0.007838414 |
| CMTM7     | 44.6883593  | 1.04631204   | 0.313662446 | 3.327243088   | 0.000877098 | 0.007838414 |
| CYHR1     | 5433.843194 | 0.42129823   | 0.126655796 | 3.326324127   | 0.000879995 | 0.007857284 |
| POLK      | 1006.312547 | -0.533989209 | 0.160559149 | -3.32581041   | 0.000881619 | 0.007867967 |
| HPK2      | 39176.87102 | -0.976641063 | 0.293743374 | -3.324810527  | 0.000884786 | 0.007888597 |
| DEF3      | 19.64535967 | 4.007156859  | 1.205207078 | 3.32487       | 0.000884598 | 0.007888597 |
| CCDC124   | 4998.852076 | 0.586572894  | 0.176459314 | 3.324377879   | 0.00088616  | 0.007897026 |
| C6orf47   | 1417.05181  | 0.334415507  | 0.100647716 | 3.322633929   | 0.000891719 | 0.007942717 |
| LRRC1     | 1231.832831 | -0.543674639 | 0.153651009 | -3.321558901  | 0.000893238 | 0.007953408 |
| GRN24PNL  | 1106.022144 | 0.437509973  | 0.131706547 | 3.321682123   | 0.000894221 | 0.007957312 |
| IRF5      | 2118.552713 | 0.82652124   | 0.248826404 | 3.321688849   | 0.000894754 | 0.007958213 |
| CAPN1     | 5218.948929 | 0.527551113  | 0.158845053 | 3.321168029   | 0.000896146 | 0.007969147 |
| SCL1A7    | 55.16422131 | 1.500723615  | 0.451886309 | 3.32102032    | 0.00089689  | 0.007969521 |
| COL27A1   | 1261.499061 | -0.55126481  | 0.166019002 | -3.320508351  | 0.000898537 | 0.007980305 |
| EIF2B4    | 2171.131637 | 0.304413122  | 0.091680842 | 3.320356951   | 0.000899024 | 0.007980788 |
| TRAPP3    | 3243.341604 | 0.42637406   | 0.133346925 | 3.319442172   | 0.000901975 | 0.008003127 |
| DFB       | 344.0224813 | -0.434280638 | 0.130845465 | -3.319034666  | 0.000903292 | 0.008010958 |
| GPRI3     | 1695.114709 | -0.108064207 | 0.312834622 | -3.318252309  | 0.000905262 | 0.008018017 |
| KCTD10    | 3125.126385 | 0.293970158  | 0.088595463 | 3.318117513   | 0.000905263 | 0.008018017 |
| NME1-NME2 | 742.0986341 | 0.968061237  | 0.29174439  | 3.318182867   | 0.000905051 | 0.008018017 |
| TRADD     | 1421.657876 | 0.619988863  | 0.186829523 | 3.318477297   | 0.000905097 | 0.008018017 |
| HLA-A     | 78921.31376 | 0.785470569  | 0.23669107  | 3.318480266   | 0.000904867 | 0.008018017 |
| CH1       | 330.7594001 | 0.741786159  | 0.223568102 | 3.317943618   | 0.000906828 | 0.008019161 |
| RIE1R1    | 6349.97927  | 0.44225647   | 0.1332888   | 3.317805479</ |             |             |

|            |             |              |             |              |               |             |
|------------|-------------|--------------|-------------|--------------|---------------|-------------|
| ATP508     | 10887.14662 | 0.503954638  | 0.151844698 | 3.316247788  | 0.000912349   | 0.008092528 |
| MANF       | 2237.14059  | 0.625177828  | 0.188592629 | 3.315550873  | 0.000914627   | 0.008064909 |
| SNRPD2     | 5393.22003  | 0.538275831  | 0.162343208 | 3.315665894  | 0.000914251   | 0.008064909 |
| CRADD      | 434.8434437 | -0.401809404 | 0.121215323 | -3.314840033 | 0.000916956   | 0.008073855 |
| IL1B       | 659.0091199 | 1.268802315  | 0.382763215 | 3.314849141  | 0.000916926   | 0.008073855 |
| TTC36      | 21.01405456 | 0.890622381  | 0.268728109 | 3.314957949  | 0.000916569   | 0.008073855 |
| RPUS1D2    | 518.3868016 | 0.38372077   | 0.115825497 | 3.312921441  | 0.000923269   | 0.008125563 |
| SOSTM1     | 27474.3737  | 0.482131028  | 0.145557406 | 3.312308444  | 0.000925295   | 0.008139302 |
| PHACTR4    | 1545.675156 | -0.357577281 | 0.107880648 | -3.31149411  | 0.000927992   | 0.008159334 |
| MFHS1      | 1258.877828 | 0.371900776  | 0.112317681 | 3.311150772  | 0.000929131   | 0.008165456 |
| GAREM1     | 1158.480001 | -0.496833672 | 0.150057083 | -3.310964475 | 0.00092975    | 0.008166999 |
| EIF251     | 2673.572359 | 0.257266827  | 0.077728094 | 3.309830622  | 0.000933524   | 0.008196247 |
| POCS       | 412.9782894 | -0.335252914 | 0.101333717 | -3.308404395 | 0.000938292   | 0.008234184 |
| SKAP1      | 30.93069619 | -0.902011148 | 0.272682976 | -3.307918844 | 0.000939992   | 0.008244547 |
| ATP5F1B    | 18739.44823 | 0.323861423  | 0.099210227 | 3.307095404  | 0.000941689   | 0.008253119 |
| DYNLRB1    | 10667.64199 | 0.558990453  | 0.169923099 | 3.3071839    | 0.000942339   | 0.008253119 |
| CL106B8    | 8076.425983 | 0.455075795  | 0.137698848 | 3.307336719  | 0.000941876   | 0.008253119 |
| CY5B1      | 3290.031948 | 0.38386557   | 0.116064768 | 3.307339294  | 0.000941867   | 0.008253119 |
| R3HDM      | 2909.772004 | 0.410440926  | 0.124121104 | 3.306777909  | 0.000943757   | 0.008258545 |
| TMEK2D5    | 5639.002384 | 0.582298042  | 0.17615334  | 3.30563157   | 0.000947626   | 0.008288467 |
| TAN C2     | 2378.3372   | -0.586149337 | 0.177355753 | -3.304935581 | 0.000949582   | 0.008303932 |
| PDE6D      | 1531.081629 | -0.359481623 | 0.108774183 | -3.304843231 | 0.000950295   | 0.008303932 |
| SH2DIA     | 69.87878862 | 0.868327035  | 0.262774106 | 3.304461951  | 0.000951589   | 0.008311299 |
| ANLN       | 11224.75052 | -0.945177009 | 0.286045653 | -3.304287261 | 0.000952182   | 0.008312536 |
| EPC1       | 1164.558606 | -0.217367374 | 0.065795263 | -3.303693387 | 0.000954201   | 0.00832622  |
| RPL8       | 39511.36865 | 0.524279839  | 0.158713964 | 3.303300018  | 0.000955541   | 0.008330021 |
| FBLX8      | 452.3260244 | 0.579975712  | 0.175570988 | 3.303388204  | 0.000955524   | 0.008330021 |
| USP91      | 2034.266504 | -0.390671531 | 0.118272655 | -3.303143338 | 0.000956075   | 0.008330107 |
| RPL35      | 23894.7812  | 0.657933657  | 0.197677063 | 3.303021968  | 0.000956455   | 0.008330107 |
| EIF5       | 3687.732792 | -0.636430162 | 0.192718013 | -3.302390513 | 0.000956455   | 0.008343856 |
| ADAMTS14   | 1463.959748 | -0.632557488 | 0.19155032  | -3.302304513 | 0.000958399   | 0.008343856 |
| HPC11      | 223.1400801 | 1.246714821  | 0.377605    | 3.301637481  | 0.000961227   | 0.008359775 |
| ANAPC10    | 387.5169251 | -0.325417809 | 0.09857078  | -3.301361822 | 0.000962167   | 0.008363483 |
| HES1L      | 2919.803074 | -0.404284609 | 0.122464158 | -3.301248421 | 0.000962556   | 0.008363483 |
| RIOX1      | 483.8678879 | 0.570582303  | 0.172912242 | 3.29983751   | 0.000967408   | 0.008401681 |
| TAX1BP3    | 5442.024969 | 0.896694899  | 0.180917015 | 3.298169005  | 0.000973175   | 0.008447785 |
| STXB3      | 2729.566307 | -0.470885397 | 0.142783328 | -3.29790181  | 0.000974102   | 0.008451848 |
| ARL9       | 104.151156  | 0.751647114  | 0.227869534 | 3.297138445  | 0.000976753   | 0.008470865 |
| GATAD1     | 2266.427167 | -0.350083428 | 0.106204283 | -3.296321181 | 0.00097956    | 0.008491552 |
| DNAGE2     | 3279.522674 | 0.57254227   | 0.173758281 | 3.29505027   | 0.000984041   | 0.008502057 |
| RIUNX3     | 684.523422  | 0.647752569  | 0.196828252 | 3.295066927  | 0.000983982   | 0.008502057 |
| CDKN2B     | 834.731344  | 0.844691163  | 0.256344635 | 3.295146633  | 0.000983703   | 0.008502057 |
| KRTAP3-2   | 424546044   | 3.803037071  | 1.154041756 | 3.295403961  | 0.000982803   | 0.008502057 |
| AMP1       | 1300.84624  | 0.44331792   | 0.1345238   | 3.295460101  | 0.000982606   | 0.008502057 |
| SGM2       | 202.9642781 | 1.047794477  | 0.317829428 | 3.295682615  | 0.000981829   | 0.008502057 |
| NOGAL      | 1407.21438  | 0.619924251  | 0.188098612 | 3.295740705  | 0.000981626   | 0.008502057 |
| MFSD8B     | 149.5479517 | 0.475599311  | 0.144356203 | 3.294623313  | 0.000985537   | 0.008510993 |
| FADD       | 1150.226833 | 0.44436917   | 0.134893072 | 3.294232708  | 0.000986908   | 0.008518838 |
| KRT17      | 324.9229772 | 1.179160851  | 0.358040692 | 3.293371057  | 0.000989937   | 0.00854099  |
| NCP2       | 3634.197679 | 0.29703442   | 0.090206861 | 3.292814062  | 0.0009919     | 0.008533923 |
| TNAV       | 8141.885724 | 0.465046623  | 0.141246561 | 3.292445629  | 0.000993201   | 0.008561132 |
| AL159163.1 | 19.35641313 | 1.271417326  | 0.386186835 | 3.292233737  | 0.00099395    | 0.00856358  |
| BP524      | 26773.4814  | 0.542693428  | 0.164858542 | 3.291873264  | 0.000995225   | 0.008570557 |
| ZNF532     | 6060.101899 | -0.500135099 | 0.151967717 | -3.291061436 | 0.000998101   | 0.008587904 |
| TEN1       | 934.7344109 | 0.545457188  | 0.165733178 | 3.291176785  | 0.000997692   | 0.008587904 |
| PSMC5      | 7362.843007 | 0.406380283  | 0.12349372  | 3.290695936  | 0.000999399   | 0.008594556 |
| NEB        | 311.106234  | -0.639172953 | 0.194270712 | -3.290114841 | 0.001001465   | 0.008608208 |
| TTH2       | 12860.50892 | -0.749048908 | 0.227677011 | -3.289927717 | 0.001002131   | 0.008609919 |
| TRIM21     | 1018.196884 | 0.726441802  | 0.220834888 | 3.289524658  | 0.001003566   | 0.008618242 |
| GSDMD      | 2126.237913 | 0.630179001  | 0.191591956 | 3.289172353  | 0.001004825   | 0.008625018 |
| TNFRSF4    | 149.9421852 | 1.075791783  | 0.327202479 | 3.287847286  | 0.001009566   | 0.00866168  |
| NLE1       | 827.4363968 | 0.353083904  | 0.107404665 | 3.287416836  | 0.001011111   | 0.008670899 |
| ZDHX15     | 456.9338287 | -0.541685197 | 0.164791369 | -3.287096886 | 0.001012226   | 0.008676716 |
| KRT36      | 18.07952678 | 1.516578431  | 0.461583253 | 3.285601069  | 0.00101765    | 0.008718864 |
| CL106F8    | 603.176689  | 0.352879562  | 0.108776921 | 3.28459344   | 0.001021296   | 0.008746035 |
| SFRP4      | 539.6167957 | -0.885273028 | 0.269560047 | -3.284140352 | 0.00102294    | 0.00876604  |
| ZNF589     | 970.639648  | 0.322169567  | 0.098121565 | 3.283372585  | 0.00102573    | 0.008771776 |
| MOC53      | 381.3704763 | 0.297493298  | 0.090603959 | 3.283445965  | 0.001025459   | 0.008771776 |
| ARHGAP22   | 2471.837383 | -0.637394723 | 0.194163020 | -3.282778179 | 0.001027895   | 0.008782142 |
| RPL25A     | 14228.30647 | 0.533466814  | 0.162503903 | 3.282801979  | 0.001027808   | 0.008782142 |
| RAL8       | 2806.08316  | 0.362959021  | 0.11057188  | 3.282562918  | 0.00102868    | 0.008787771 |
| CL106J2    | 89.17893304 | 0.932040548  | 0.284003899 | 3.281788267  | 0.001031511   | 0.008804865 |
| FMN12      | 13927.40999 | -0.811270126 | 0.247245881 | -3.281228872 | 0.001033561   | 0.008807259 |
| N4BP2L2    | 3308.133467 | -0.371221804 | 0.113141363 | -3.281044119 | 0.001034236   | 0.008807259 |
| GAS2       | 70.54085504 | -0.759449112 | 0.231478629 | -3.28086059  | 0.001034909   | 0.008807259 |
| FZD7       | 1061.807488 | 0.819025068  | 0.249641977 | 3.280798671  | 0.001035136   | 0.008807259 |
| SSR3       | 6175.111909 | 0.37784678   | 0.115160984 | 3.281031203  | 0.001034283   | 0.008807259 |
| HGF22      | 88.44048453 | 0.750254022  | 0.238659258 | 3.281100569  | 0.001034029   | 0.008807259 |
| NAT9       | 1692.695656 | 0.344725273  | 0.105061484 | 3.281176498  | 0.00103375    | 0.008807259 |
| FRS2       | 2038.559336 | -0.728083445 | 0.221943987 | -3.280482865 | 0.00103296    | 0.008808991 |
| CCL8       | 158.7080499 | 1.599740008  | 0.487640886 | 3.280569891  | 0.001035976   | 0.008808991 |
| NKRN3      | 245.9634696 | -0.663562553 | 0.202349697 | -3.279285563 | 0.001040699   | 0.008842343 |
| CHMP1B     | 3213.125616 | 0.373206182  | 0.113827478 | 3.278700258  | 0.001042863   | 0.00885665  |
| HIC1       | 1116.45317  | -0.313734129 | 0.095707247 | -3.278214408 | 0.00104466    | 0.008867822 |
| NKX        | 1111.27465  | -0.422797354 | 0.128982348 | -3.27795004  | 0.001045639   | 0.008867962 |
| NROX6      | 325.8358639 | 0.538087614  | 0.164151308 | 3.277997761  | 0.001045462   | 0.008867962 |
| DDIT3      | 5563.298122 | 0.41142753   | 0.125524805 | 3.277697761  | 0.001046717   | 0.008872021 |
| LGALS7B    | 11.87524524 | 3.064600761  | 0.935165068 | 3.277069328  | 0.001048906   | 0.00888745  |
| TAGLN2     | 14095.97756 | 0.740845843  | 0.226083434 | 3.276869204  | 0.00104965    | 0.00889704  |
| PRSS1      | 3.944372954 | -2.88947015  | 0.881932458 | -3.275700976 | 0.001054001   | 0.008918358 |
| RSAD1      | 2216.571387 | 0.269745381  | 0.08234507  | 3.27579272   | 0.001053659   | 0.008918358 |
| SLC30A1    | 1904.596797 | 0.557702584  | 0.17027459  | 3.275313031  | 0.00105545    | 0.008926516 |
| NTAN1      | 1313.52175  | 0.365795443  | 0.111692187 | 3.275031609  | 0.001056002   | 0.008931315 |
| CLL17      | 16.11717807 | 1.802985659  | 0.550578777 | 3.274709695  | 0.001057706   | 0.008933998 |
| STK38      | 1503.764834 | 0.392236262  | 0.119815293 | 3.273674441  | 0.001061588   | 0.008956029 |
| TSR3       | 4366.631324 | 0.566938143  | 0.173200614 | 3.273200614  | 0.00106337    | 0.008972911 |
| INHBA      | 277.4041488 | 0.92113046   | 0.281409609 | 3.273272942  | 0.001063098   | 0.008972911 |
| GNP1       | 1627.187521 | 0.36991133   | 0.113124646 | 3.26944819   | 0.001075685   | 0.009072674 |
| EPED1      | 183.396546  | 0.866450465  | 0.265093013 | 3.268489515  | 0.001081223   | 0.009115049 |
| NOBP       | 59976.19522 | -1.242966018 | 0.380284325 | -3.268361428 | 0.001081721   | 0.009115049 |
| PWP1       | 2059.219408 | 0.149676905  | 0.045797429 | 3.268238175  | 0.001082193   | 0.009115049 |
| AD10463.1  | 3.518703313 | 2.79702833   | 0.850578505 | 3.268014437  | 0.001083048   | 0.00911805  |
| ZNF408     | 879.4667814 | 0.503404943  | 0.154049613 | 3.267810494  | 0.001083829   | 0.009120496 |
| TTC31      | 973.8519483 | -0.263869592 | 0.080788228 | -3.266143583 | 0.00109023    | 0.009166446 |
| ILRL2      | 37.52948124 | 1.221411129  | 0.373962877 | 3.26612935   | 0.001090284   | 0.009166446 |
| ATP8B4     | 486.797     | -0.836915924 | 0.25635806  | -3.264665377 | 0.001095935   | 0.009204197 |
| SYND1      | 2406.198464 | -0.693129243 | 0.212318176 | -3.264577978 | 0.001096273   | 0.009204197 |
| CLTA       | 10511.71287 | 0.492176492  | 0.150760364 | 3.264627922  | 0.001096608   | 0.009204197 |
| AFDN       | 3084.745782 | -0.443415438 | 0.135888921 | -3.26307749  | 0.001102112   | 0.009246637 |
| MARCH      | 1405.835748 | -0.716273221 | 0.219515792 | -3.26296899  | 0.001102516   | 0.009246637 |
| OSBP1      | 1454.35839  | -0.53321156  | 0.163450674 | -3.262887476 | 0.001102833   | 0.009246637 |
| GOLGA7     | 5441.49086  | -0.437611279 | 0.134132689 | -3.262524915 | 0.001104245   | 0.009254263 |
| ETFB       | 6497.559281 | 0.705291317  | 0.216197708 | 3.262251641  | 0.001105311   | 0.009258979 |
| RILP       | 705.1774702 | 0.572210089  | 0.175440466 | 3.261562727  | 0.001107999</ |             |

|              |             |              |             |              |             |             |
|--------------|-------------|--------------|-------------|--------------|-------------|-------------|
| NTSCB        | 2450.531801 | 0.38909791   | 0.11921158  | 1.26044229   | 0.00112288  | 0.00930134  |
| SPMB         | 1399.156572 | 0.64505741   | 0.19785966  | 1.26017518   | 0.00111414  | 0.00930168  |
| EGM          | 221.527473  | 1.84187269   | 0.56495639  | 1.26020178   | 0.00111332  | 0.00930168  |
| GRFP         | 7.46820324  | 1.73831379   | 0.53187704  | 1.25983746   | 0.00114779  | 0.00930685  |
| SHGL3        | 3461.441618 | -0.931148676 | 0.28572908  | -3.25885155  | 0.001118642 | 0.00933304  |
| PAPP2        | 123.006708  | -1.01722475  | 0.31215604  | -3.25870596  | 0.001119216 | 0.00933304  |
| PLML1        | 1746.534448 | 1.055417198  | 0.323873594 | 3.258731859  | 0.001119114 | 0.00933304  |
| TBRG4        | 2328.6709   | 0.383414604  | 0.117670208 | 3.258382995  | 0.001120491 | 0.00933945  |
| ATXN1        | 2440.104327 | -0.521079444 | 0.159953349 | -3.257696369 | 0.001123205 | 0.009353614 |
| SLC3A3       | 9.30804072  | 1.721812833  | 0.52851757  | 3.25781569   | 0.001122733 | 0.009353614 |
| FAMF6        | 566.500319  | -0.415674727 | 0.127612659 | -3.257315761 | 0.001124712 | 0.009359978 |
| NEO30        | 430.5408449 | -0.429471712 | 0.131851136 | -3.257246966 | 0.001124985 | 0.009359978 |
| TRPV3        | 645.7934588 | -0.66154519  | 0.203115208 | -3.256994904 | 0.001125985 | 0.009364066 |
| ARF5         | 6935.715889 | 0.38342864   | 0.117734814 | 3.256714189  | 0.001127099 | 0.009369102 |
| UAP5         | 995.549986  | 0.43723512   | 0.134271776 | 3.256213127  | 0.001129089 | 0.009381419 |
| CBG5         | 1841.345392 | -0.76257471  | 0.234209408 | -3.255925273 | 0.001130126 | 0.009385803 |
| PAM6         | 1045.587807 | 0.535577549  | 0.164528662 | 3.255245267  | 0.001132985 | 0.009405304 |
| AC06354.1    | 322.4990954 | -0.71924685  | 0.220643398 | -3.25505019  | 0.001133784 | 0.0094077   |
| FRG1         | 1518.408143 | 0.473538731  | 0.145493012 | 3.254718037  | 0.001135005 | 0.009413967 |
| SLC25A13     | 1750.536994 | -0.546598808 | 0.168069501 | -3.254360881 | 0.001136478 | 0.009421572 |
| PKC2B        | 2503.19283  | -0.604781356 | 0.185875284 | -3.253694315 | 0.001139148 | 0.009439459 |
| FADS3        | 4373.924542 | 0.479668864  | 0.147472151 | 3.252592858  | 0.001143572 | 0.009471862 |
| NKTR         | 4027.225472 | -0.567946526 | 0.174622113 | -3.252431874 | 0.001144422 | 0.009472971 |
| TCF15        | 38.62623911 | 1.114212823  | 0.342626366 | 3.251976306  | 0.001146056 | 0.009483907 |
| SLC25A11     | 4293.241789 | 0.342792523  | 0.105426784 | 3.251474713  | 0.001148008 | 0.009496393 |
| WWC2         | 772.6698086 | -0.64942148  | 0.198423036 | -3.250339071 | 0.001152675 | 0.009530123 |
| USP21        | 1464.325803 | -0.269036195 | 0.082799073 | -3.249265794 | 0.001157033 | 0.009559484 |
| BTF3         | 11954.8748  | 0.405664807  | 0.124850321 | 3.249209127  | 0.001157263 | 0.009559484 |
| HDW          | 538.2562867 | 0.707276407  | 0.217711393 | 3.248673175  | 0.001159446 | 0.009572322 |
| COL5A3       | 6280.905317 | -0.858533951 | 0.264321772 | -3.248063696 | 0.001161933 | 0.009589456 |
| PZD1         | 794.1077121 | 0.575197452  | 0.177111559 | 3.247661999  | 0.001163596 | 0.0095989   |
| NCTD8        | 953.4232827 | -0.363136988 | 0.111919746 | -3.246406056 | 0.001168772 | 0.009635566 |
| SPOP         | 2582.195014 | -0.201596448 | 0.062100061 | -3.246316421 | 0.001169088 | 0.009635566 |
| ORMCL2       | 1148.213807 | 0.619486307  | 0.190836896 | 3.246155856  | 0.001169748 | 0.009636693 |
| ACER3        | 2743.022764 | -0.507077641 | 0.156224378 | -3.245829156 | 0.001171091 | 0.009643447 |
| APT4         | 1276.659034 | 0.283595838  | 0.087383753 | 3.245406913  | 0.001172829 | 0.009653446 |
| POR          | 3260.391654 | 0.368003366  | 0.113398147 | 3.245232628  | 0.001173547 | 0.009655045 |
| MNMBAL       | 3128.692239 | 0.375211585  | 0.115634551 | 3.244805134  | 0.001175311 | 0.009665235 |
| BRMB         | 2679.600242 | 0.547959688  | 0.16895336  | 3.243255465  | 0.001181722 | 0.009700648 |
| HSD17B4      | 2115.272866 | 0.610238049  | 0.188156007 | 3.243255474  | 0.001181721 | 0.009700648 |
| SPATCL       | 946.3970048 | 0.53970834   | 0.166406393 | 3.243314931  | 0.001181475 | 0.009700648 |
| TCEA3        | 978.6822017 | 0.675486577  | 0.208256641 | 3.243292988  | 0.001180585 | 0.009700648 |
| HRD18        | 2337.662272 | -0.49817051  | 0.153671777 | -3.241669061 | 0.001188319 | 0.009749053 |
| MIP          | 2098.408073 | 0.567019473  | 0.174920528 | 3.241583156  | 0.001188677 | 0.009749053 |
| MZT2A        | 2349.438282 | 0.35470114   | 0.171180855 | 3.240439127  | 0.001193458 | 0.009779559 |
| QIPCT        | 372.3729697 | 0.884586278  | 0.272882493 | 3.240495236  | 0.001193321 | 0.009779559 |
| ZNFT87       | 1681.29111  | 0.422887802  | 0.130556698 | 3.239107294  | 0.001199045 | 0.009820974 |
| CIQTNF9B     | 13.76514029 | -1.23210514  | 0.380743346 | -3.238954868 | 0.001199686 | 0.009821859 |
| MNPL15       | 124.3366817 | -1.48924448  | 0.459802668 | -3.238179994 | 0.001202949 | 0.009844203 |
| TREX1        | 1219.19766  | 0.615129799  | 0.190021997 | 3.237150484  | 0.001207297 | 0.009875402 |
| NDUFA7       | 2522.712794 | 0.487013179  | 0.150452033 | 3.236999666  | 0.001207936 | 0.00987624  |
| STX16-NPEPL1 | 324.179591  | -0.882378093 | 0.272689503 | -3.235834467 | 0.001212877 | 0.009911038 |
| FLAD1        | 1654.524158 | 0.391863712  | 0.121104722 | 3.23574264   | 0.001213267 | 0.009911038 |
| TRMT10A      | 218.8339094 | -0.354631136 | 0.109612468 | -3.235317515 | 0.001215075 | 0.00992141  |
| PXN          | 5208.309762 | 0.473297205  | 0.146353654 | 3.233928181  | 0.001210002 | 0.009953384 |
| ZNFX38       | 4894.564354 | -0.279888021 | 0.086564124 | -3.233111985 | 0.001223639 | 0.009975029 |
| BFF1         | 4009.802169 | 0.5632021    | 0.174189549 | 3.233273513  | 0.001223807 | 0.009975029 |
| TENT5A       | 1119.859527 | 0.885113901  | 0.273745156 | 3.233350003  | 0.001223476 | 0.009975029 |
| MEP2A        | 8746.471194 | -0.43306888  | 0.143950814 | -3.232091135 | 0.001224851 | 0.009979122 |
| PRDM6        | 54.69496654 | -0.864739611 | 0.267570245 | -3.231822767 | 0.001230033 | 0.010005146 |
| EEF1G        | 39757.00499 | 0.374931775  | 0.116013994 | 3.231780167  | 0.001230217 | 0.010005146 |
| NBEAL2       | 1971.681056 | 0.533006083  | 0.164922026 | 3.231867178  | 0.001229842 | 0.010005146 |
| ABC6         | 1639.680828 | 0.416098327  | 0.128742316 | 3.232024548  | 0.001229165 | 0.010005146 |
| SLCO1A2      | 8134.992369 | -1.195960032 | 0.370086395 | -3.231568084 | 0.001231122 | 0.010008096 |
| NLR3         | 92.45074932 | -0.763967495 | 0.236433436 | -3.231215977 | 0.001232648 | 0.010016077 |
| ZBTB45       | 1054.740881 | 0.382510959  | 0.118429826 | 3.229853247  | 0.001238538 | 0.010059503 |
| LYAR         | 496.56183   | 0.456884793  | 0.141477775 | 3.229375002  | 0.001240611 | 0.010071903 |
| THP9         | 292.6580665 | -0.463940992 | 0.143692264 | -3.228712376 | 0.001243489 | 0.010098822 |
| HECW2        | 1068.444584 | -0.657190814 | 0.2035639   | -3.228425141 | 0.001244738 | 0.010096515 |
| SLC29A1      | 2043.430112 | 0.497529329  | 0.154179393 | 3.226937014  | 0.001251223 | 0.010144706 |
| TSEN15       | 2039.860717 | 0.300458093  | 0.093128683 | 3.226267965  | 0.001254159 | 0.010163981 |
| ERP          | 4137.28474  | -0.336420001 | 0.10428807  | -3.225872345 | 0.001255894 | 0.010173566 |
| Clorf131     | 477.5842141 | -0.256448208 | 0.079520219 | -3.224943443 | 0.001259976 | 0.010202148 |
| CKR6         | 42.80334663 | -1.381269833 | 0.428351309 | -3.224619149 | 0.001261404 | 0.010209225 |
| NMUS1        | 1218.365421 | 0.40544624   | 0.125743257 | 3.224397463  | 0.001262381 | 0.010212648 |
| DNAC7        | 4769.640602 | 0.353893187  | 0.1097652   | 3.224092752  | 0.001263725 | 0.010219035 |
| CCDC17       | 83.39898997 | -0.727906081 | 0.225839737 | -3.223108963 | 0.001268073 | 0.010249701 |
| ECM1         | 1219.865258 | 0.752652328  | 0.233621994 | 3.221667266  | 0.001274447 | 0.010296894 |
| ARGAP1       | 7693.960365 | 0.442757222  | 0.137473571 | 3.220671583  | 0.001278906 | 0.01032368  |
| FBL          | 3370.651965 | 0.599184452  | 0.186037108 | 3.220779226  | 0.001278425 | 0.01032368  |
| ATG10        | 357.0349106 | -0.394868402 | 0.12262149  | -3.220099508 | 0.001281461 | 0.010339775 |
| SNX19        | 4672.384339 | -0.329297749 | 0.102270891 | -3.21985803  | 0.001282541 | 0.010343959 |
| C8orf76      | 617.6481359 | 0.348201505  | 0.108164893 | 3.219173028  | 0.001285609 | 0.010359635 |
| NUDTR        | 275.6846829 | 0.727124109  | 0.225864526 | 3.219293968  | 0.001285067 | 0.010359635 |
| SLC22A       | 719.9284608 | 0.352370891  | 0.078419128 | 3.218211303  | 0.001289818 | 0.010389168 |
| CEK2         | 274.0087474 | 0.688421099  | 0.213953141 | 3.217628375  | 0.001292552 | 0.010404843 |
| VPS37D       | 436.9939483 | 0.530718673  | 0.164999004 | 3.216574201  | 0.00129731  | 0.010440228 |
| NANTR        | 746.3597795 | -0.545933533 | 0.169749724 | -3.216108517 | 0.001299417 | 0.01044806  |
| BCDN3D       | 838.6534862 | 0.482713247  | 0.150088396 | 3.216192997  | 0.001299034 | 0.01044806  |
| ZNFX30       | 1258.511741 | 0.305941953  | 0.095146555 | 3.215545375  | 0.001301969 | 0.010464016 |
| PHF2         | 6011.966099 | 0.298176008  | 0.092735134 | 3.215310115  | 0.001302851 | 0.01046654  |
| TMEM80       | 762.7434474 | -0.335845474 | 0.104478513 | -3.214493244 | 0.00130675  | 0.010493287 |
| CHT13        | 136.2917238 | 1.154749105  | 0.359252011 | 3.214314938  | 0.001307622 | 0.010495233 |
| FRMDA        | 2171.992604 | -0.355014585 | 0.110460994 | -3.213936193 | 0.001309288 | 0.010504511 |
| CD8A         | 195.5878181 | -0.810344396 | 0.252199119 | -3.213113505 | 0.001313044 | 0.010520907 |
| SO5T         | 7.495894196 | 1.792495115  | 0.557850584 | 3.213218486  | 0.001312564 | 0.010520907 |
| SH2DA        | 276.84779   | 0.597120687  | 0.185828668 | 3.213286199  | 0.001312255 | 0.010520907 |
| INPP4B       | 276.4866152 | -0.610524105 | 0.190020718 | -3.21284287  | 0.001313824 | 0.010525284 |
| ERGAP7B      | 1238.289408 | -0.662759827 | 0.206283677 | -3.21281771  | 0.001314442 | 0.01052378  |
| Clorf50      | 5685.17921  | 0.457207321  | 0.142336303 | 3.212162499  | 0.001317998 | 0.010542047 |
| NPM2         | 1100.032648 | 0.482941588  | 0.150425238 | 3.210508925  | 0.001322002 | 0.010598287 |
| GZMB         | 103.6374091 | 1.186808894  | 0.369743708 | 3.209815025  | 0.001328204 | 0.010619295 |
| SCHP1        | 3765.714455 | -0.718157846 | 0.223771764 | -3.209331828 | 0.001330439 | 0.010627937 |
| ZGPA7        | 1899.086638 | 0.481221281  | 0.149942003 | 3.209382762  | 0.001330203 | 0.010627937 |
| DOCK4        | 3141.73997  | -0.748829796 | 0.233371199 | -3.208749828 | 0.001333134 | 0.010644858 |
| ERN1         | 615.2677298 | 0.594424336  | 0.185305748 | 3.207803015  | 0.001337531 | 0.010676338 |
| FRK          | 377.748204  | -0.605097917 | 0.188655917 | -3.207415528 | 0.001339334 | 0.010685101 |
| ATM          | 3813.877791 | 0.183240004  | 0.057137208 | 3.207071113  | 0.00134119  | 0.010695281 |
| ZNFB83       | 22.98451323 | -1.27096542  | 0.396432493 | -3.206007181 | 0.001345906 | 0.010728247 |
| MFU51        | 7983.176714 | -0.679689341 | 0.212018064 | -3.205806338 | 0.001346835 | 0.010729545 |
| ZACN         | 8.161323945 | 1.523466359  | 0.484360915 | 3.205599109  | 0.001347816 | 0.010729545 |
| RBMS5        | 2794.401578 | 0.314356541  | 0.098062168 | 3.205686347  | 0.001347408 | 0.010729545 |
| EG1A         | 1213.51762  | 0.614377122  | 0.191688593 | 3.205101866  | 0.001350147 | 0.010743462 |
| RPS2         | 43460.00138 | 0.536384246  | 0.167391708 | 3.204365758  | 0.001353604 | 0.01        |

|            |             |              |             |               |             |             |
|------------|-------------|--------------|-------------|---------------|-------------|-------------|
| ZNF584     | 546.6008710 | 0.357366077  | 0.111573936 | 3.20295303    | 0.001360263 | 0.010806347 |
| BORCS6     | 728.2307592 | 0.500158798  | 0.156166776 | 3.202722225   | 0.001361352 | 0.010809289 |
| CCDC73     | 1.369855752 | -1.461721192 | 0.456632144 | -1.201091319  | 0.001360801 | 0.010804135 |
| RLCS1SCHP1 | 2466.861044 | -0.648179254 | 0.202488859 | -1.201061325  | 0.001369224 | 0.010804135 |
| PPMB       | 2811.103002 | -0.368086711 | 0.11499111  | -1.201001474  | 0.001369508 | 0.010804135 |
| RRAS       | 1982.541064 | 0.654145862  | 0.20434299  | 3.201215083   | 0.001368493 | 0.010804135 |
| RBMS8      | 2028.000388 | 0.515614208  | 0.161059638 | 3.201386847   | 0.001367678 | 0.010804135 |
| LMNB2      | 2241.477866 | 0.497970576  | 0.155537793 | 3.201604992   | 0.001366643 | 0.010804135 |
| SIGLEC14   | 736.7281855 | 1.027948714  | 0.321069827 | -3.20163599   | 0.001366496 | 0.010804135 |
| NDUFA6     | 1855.833969 | 0.531516823  | 0.166118118 | 3.199630668   | 0.001376038 | 0.010808366 |
| PRIMPOL    | 408.1042917 | -0.33680004  | 0.10527634  | -3.199199751  | 0.001378096 | 0.010809974 |
| DOCK3      | 2339.955661 | -0.865224493 | 0.270475019 | -3.198907228  | 0.001379496 | 0.010906359 |
| FTL        | 389573.5679 | 0.800418688  | 0.250251868 | 3.198452393   | 0.001381673 | 0.010918894 |
| ZFAN D3    | 4584.727781 | -0.453239972 | 0.141724615 | -3.198012835  | 0.001383685 | 0.010930105 |
| EXO5B      | 2476.502009 | 0.658516595  | 0.205976018 | -3.197056501  | 0.001383737 | 0.010952322 |
| NALGAP1    | 7237.29492  | -0.591314978 | 0.184899332 | -3.196992995  | 0.001385649 | 0.010955232 |
| NAPA       | 9143.049663 | 0.3899063    | 0.121952908 | 1.197187385   | 0.001387747 | 0.010955232 |
| ZDHC11B    | 2226.311264 | -0.753003551 | 0.235618601 | -1.195857833  | 0.001394158 | 0.010993982 |
| NDUFA8     | 2783.541984 | 0.412132532  | 0.128968213 | 3.195613262   | 0.001395334 | 0.010998598 |
| MCRP1      | 7748.76379  | 0.5010936    | 0.156824227 | 3.195256309   | 0.001397067 | 0.011007503 |
| SHTG2      | 1498.684884 | -0.837401143 | 0.262115974 | -3.194773404  | 0.001399407 | 0.011011233 |
| PDE4B      | 4144.977991 | -0.485028171 | 0.151819916 | -3.194759845  | 0.001399472 | 0.011011233 |
| FXYD5      | 3842.619513 | 0.821124307  | 0.257071387 | 3.194927312   | 0.001398661 | 0.011011233 |
| BIN3       | 1080.686105 | 0.335315758  | 0.104885016 | 3.19393921    | 0.001403457 | 0.011034259 |
| BCL2L14    | 18.27212276 | 1.308430049  | 0.409658734 | 3.193951304   | 0.001403398 | 0.011034259 |
| GMPPA      | 2092.603931 | 0.459992687  | 0.144076793 | 3.192691038   | 0.001409537 | 0.011077936 |
| SIHR2      | 1217.847821 | 0.383567616  | 0.120149168 | 3.192428392   | 0.001410819 | 0.011082888 |
| CFAP43     | 230.3758713 | -0.845798297 | 0.264854009 | -3.192234863  | 0.001411765 | 0.011085392 |
| MFAP2      | 211.9629265 | 1.320101821  | 0.413747237 | 3.190599712   | 0.001419778 | 0.011143567 |
| GMPP2A     | 8263.208872 | 0.603646471  | 0.189213032 | 3.190300716   | 0.001421248 | 0.011145661 |
| NIFK       | 1566.858023 | 0.330045291  | 0.103449163 | 3.190411436   | 0.001420704 | 0.011145661 |
| KCNK16     | 1.633386532 | -1.880210999 | 0.589465579 | -1.189687519  | 0.001424267 | 0.011164531 |
| PCPD       | 795.4641011 | 0.4640304    | 0.145513201 | 3.188923044   | 0.001428039 | 0.01118934  |
| EBNA1BP2   | 3143.154611 | 0.398221949  | 0.124898977 | 3.188352371   | 0.001430861 | 0.011206689 |
| BATF3      | 347.577792  | 0.822245965  | 0.257985122 | 3.187183615   | 0.001436655 | 0.011247291 |
| BMP2K      | 2999.306867 | -0.537937733 | 0.168834228 | -3.186188848  | 0.001441605 | 0.01126774  |
| DCU N1D6   | 749.0533425 | 0.272150212  | 0.085422753 | 3.185921789   | 0.001442936 | 0.01126774  |
| GJB3       | 38.49189157 | 1.628020289  | 0.510998316 | 3.185960184   | 0.001442745 | 0.01126774  |
| TMPS55     | 2069.965116 | 0.762345901  | 0.239273556 | 3.186085053   | 0.001442122 | 0.01126774  |
| WDR77      | 1838.121324 | 0.378462767  | 0.118779632 | 3.186259799   | 0.001441251 | 0.01126774  |
| DKS5       | 1283.584238 | 0.24975814   | 0.078380354 | 3.186489007   | 0.001440109 | 0.01126774  |
| NIPT       | 752.910011  | 0.360987407  | 0.113319307 | 3.18557727    | 0.001444655 | 0.011276387 |
| PEX2       | 2045.541782 | -0.406144659 | 0.127611291 | -3.185166427  | 0.001446708 | 0.011287628 |
| PTG DR     | 11.66033414 | -1.20299875  | 0.377763929 | -3.184525195  | 0.001449917 | 0.011307879 |
| GAD65A     | 4392.468852 | 0.811045207  | 0.254698163 | 3.184439005   | 0.001450883 | 0.011310368 |
| PLEKHG3    | 6975.809368 | -0.627962197 | 0.197239652 | -1.183752311  | 0.001453794 | 0.011328525 |
| MYO1D      | 3585.160199 | -0.778624211 | 0.244605177 | -3.183187784  | 0.001456631 | 0.011345839 |
| JAZF1      | 1085.394163 | -0.510827309 | 0.160489007 | -3.182942676  | 0.001457865 | 0.011350565 |
| FAM170A    | 1.991151495 | -1.75585485  | 0.551684952 | -3.182712967  | 0.001459022 | 0.011354779 |
| NMT2       | 712.511623  | 0.396939387  | 0.124722014 | 3.182592817   | 0.001459627 | 0.011354779 |
| HDBF5      | 31.73915086 | 0.874749029  | 0.274905371 | 3.182000499   | 0.001462616 | 0.011373223 |
| MYPF       | 24347.16299 | -0.714670803 | 0.224637608 | -3.181433881  | 0.001465455 | 0.011390496 |
| US3L2      | 1157.210959 | -0.44803608  | 0.140849052 | -3.180966962  | 0.001467844 | 0.011404254 |
| TLR10      | 100.7586679 | -0.842050278 | 0.264776082 | -3.18023545   | 0.001471554 | 0.011428267 |
| SERPIN B7  | 10.28241549 | 2.882723294  | 0.892634234 | 3.179659916   | 0.00147448  | 0.011446162 |
| HESX1      | 64.68170159 | -0.617064245 | 0.194081729 | -3.179402094  | 0.001475782 | 0.011447992 |
| CGAL G     | 2304.895977 | 0.377446213  | 0.087264538 | 3.179369537   | 0.001475958 | 0.011447992 |
| CC42BPA    | 4211.825174 | -0.584675244 | 0.184002681 | -3.178581639  | 0.001479975 | 0.011478222 |
| REV1       | 1426.885062 | -0.289748189 | 0.091194298 | -1.177262488  | 0.001486724 | 0.011518685 |
| CAPN51     | 19488.91123 | 0.492191354  | 0.154918576 | 3.177097071   | 0.001487572 | 0.011518685 |
| SSB        | 3699.566403 | 0.237169616  | 0.074647396 | 3.177198775   | 0.001487051 | 0.011518685 |
| ANKRD36B   | 594.4518718 | -0.557009103 | 0.175361099 | -3.176355003  | 0.001491383 | 0.011543344 |
| ERIC2      | 107.0245624 | 0.588020567  | 0.185153435 | 3.175855563   | 0.001493953 | 0.011558381 |
| NCF4       | 1484.72845  | 0.881088899  | 0.277452922 | 3.175638456   | 0.001495072 | 0.01156218  |
| ZNF394     | 798.6254224 | 0.351844292  | 0.110805024 | 3.175346028   | 0.001496579 | 0.011568984 |
| RBP3       | 369.7313201 | 0.831237317  | 0.26182133  | 3.174826578   | 0.001499261 | 0.011584854 |
| ANKRD53    | 104.0027962 | 0.924998639  | 0.291133338 | 3.174616609   | 0.001500346 | 0.01158838  |
| NBP        | 956824.2098 | -1.07427992  | 0.338459746 | -3.174025664  | 0.001503404 | 0.011607135 |
| RYR1       | 1418.69335  | -0.74140552  | 0.233652602 | -3.1733110478 | 0.001508151 | 0.011638911 |
| MRP1 57    | 2284.584929 | 0.339257666  | 0.106922576 | 3.172928355   | 0.001509098 | 0.011641339 |
| RIAS       | 4047.251118 | 0.493507708  | 0.155669944 | 3.172256116   | 0.001512595 | 0.01166344  |
| NLH3 32    | 1974.766892 | -0.866827101 | 0.273348076 | -3.171147633  | 0.001518338 | 0.011703144 |
| FBP1       | 775.571469  | 0.851221088  | 0.268486005 | 3.170438004   | 0.001522093 | 0.011726862 |
| CDQB8A     | 2895.560983 | 0.328611859  | 0.103673781 | 3.169671803   | 0.001526117 | 0.011752912 |
| RNF146     | 2295.729345 | -0.295191433 | 0.093142976 | -3.169229143  | 0.001528438 | 0.011765911 |
| RPUS1D1    | 1427.259857 | 0.427768733  | 0.134986485 | 3.168974524   | 0.001529778 | 0.011771307 |
| VPS8       | 2419.502965 | -0.378430465 | 0.119438314 | -3.168417686  | 0.001532711 | 0.011788956 |
| MSH6       | 462.7834062 | -0.466494278 | 0.147626338 | -3.167764298  | 0.00153616  | 0.011806409 |
| XAF1       | 2273.544916 | -0.534348491 | 0.168689507 | -3.167717109  | 0.001536433 | 0.011806409 |
| CISD       | 1532.380157 | 0.522923458  | 0.165083825 | 3.167623827   | 0.001536902 | 0.011806409 |
| ACD10422.3 | 591.5003064 | 1.188682563  | 0.375285908 | 3.167405272   | 0.001538058 | 0.011810364 |
| RIUNDC1    | 1020.866189 | 0.31265918   | 0.09874017  | 3.16648411    | 0.001542938 | 0.011837968 |
| C19orf12   | 1678.977553 | 0.290846058  | 0.09184931  | 3.1665568     | 0.001542552 | 0.011837968 |
| PRKDC1     | 1499.147501 | -0.527356247 | 0.166653462 | -3.164388196  | 0.001545094 | 0.011851958 |
| FAM81A     | 1089.937556 | 0.697158129  | 0.220356888 | 3.163768303   | 0.001557407 | 0.011939043 |
| SLC35A3    | 816.6522449 | -0.393344163 | 0.124367108 | -3.162768537  | 0.001562765 | 0.011975136 |
| ERP27      | 36.91700078 | -0.781116695 | 0.246991159 | -1.162528587  | 0.001564054 | 0.011980028 |
| AKX        | 760.1182359 | -0.505003955 | 0.159698188 | -1.162239716  | 0.001565606 | 0.011986937 |
| BCLAF3     | 618.2006781 | -0.310348633 | 0.098164663 | -3.161504275  | 0.001569565 | 0.012012258 |
| ZBED3      | 2342.453371 | -0.43153256  | 0.136638549 | -3.160518139  | 0.001574888 | 0.012047991 |
| RTRAF      | 4709.333419 | 0.383353527  | 0.121302014 | 3.160322838   | 0.001575944 | 0.012051068 |
| POLR3H     | 3477.900904 | 0.30159673   | 0.095448346 | 3.159789914   | 0.001578829 | 0.012068124 |
| TFCP2      | 1841.734636 | -0.236787937 | 0.074945556 | -3.159465994  | 0.001580585 | 0.012076538 |
| PGAP2      | 986.7909444 | -0.285760009 | 0.090472208 | -3.158539212  | 0.00158562  | 0.012102148 |
| RNF144A    | 2902.906513 | -0.64654275  | 0.204100612 | -3.158512209  | 0.001585767 | 0.012102148 |
| C1orf226   | 471.6495314 | -0.888732518 | 0.281418825 | -3.158042168  | 0.001588326 | 0.012102148 |
| TBC1D2     | 2489.54454  | -0.790010323 | 0.25015908  | -3.158031777  | 0.001588382 | 0.012102148 |
| KDMA       | 955.2112388 | -0.645547913 | 0.204439354 | -3.157649934  | 0.001590464 | 0.012102148 |
| RPLP2      | 21067.06659 | 0.428038963  | 0.135559096 | 3.157523263   | 0.001591161 | 0.012102148 |
| RHLD3      | 9244.346802 | 0.67797125   | 0.214715779 | 3.157556094   | 0.001590976 | 0.012102148 |
| WDR89      | 439.7601647 | 0.216946648  | 0.068700224 | 3.15787248    | 0.001589251 | 0.012102148 |
| ACADM      | 19295.90748 | 0.441727605  | 0.13988092  | 3.157881189   | 0.001589192 | 0.012102148 |
| SCAMP3     | 4036.905327 | 0.454676918  | 0.143980171 | 3.157913444   | 0.001589027 | 0.012102148 |
| MRPS15     | 2286.045129 | 0.398315154  | 0.126131928 | 3.157924887   | 0.001588965 | 0.012102148 |
| C12orf76   | 2761.11767  | -0.491150804 | 0.155608599 | -3.156321745  | 0.001597725 | 0.012147061 |
| GOLGA1     | 1581.03259  | -0.120689244 | 0.066764764 | -3.155695165  | 0.001601161 | 0.012164386 |
| BTN1B      | 17.85634763 | 1.215999209  | 0.38533844  | 3.15566547    | 0.001601324 | 0.012164386 |
| WDR20      | 1083.112273 | -0.299375108 | 0.094881443 | -3.15525503   | 0.001603579 | 0.012176494 |
| RPA4       | 4.839149587 | 1.72400038   | 0.561832092 | 3.154679236   | 0.001606747 | 0.012190503 |
| SIRT7      | 1386.936312 | 0.372589483  | 0.118104397 | 3.154746931   | 0.001606574 | 0.012190503 |
| GLMN       | 3678.374528 | -0.699329144 | 0.209914033 | -3.154473101  | 0.001607882 | 0.012194908 |
| TAS2R14    | 103.469156  | -0.78332282  | 0.248351308 | -3.154091848  | 0.001609984 | 0.012201182 |
| PTPBD      | 6179.431222 | -0.839479363 | 0.266167566 | -3.15395063   | 0.001610763 | 0.012201182 |
| GENPC      | 703.08469   | -0.418955012 | 0.132841499 |               |             |             |

|            |             |              |             |              |             |             |
|------------|-------------|--------------|-------------|--------------|-------------|-------------|
| SHD21      | 919.519277  | 0.7268277    | 0.2304099   | 3.1538778    | 0.001611165 | 0.012201182 |
| RGPEP1     | 3182.305827 | 0.37077903   | 0.11760099  | 3.15286472   | 0.001616814 | 0.01222862  |
| NROB1      | 45.5029112  | 1.0847083    | 0.343742309 | 3.151986474  | 0.001621642 | 0.012252099 |
| C4or3      | 686.266946  | -0.33804022  | 0.107266703 | -1.151401255 | 0.001624891 | 0.012272588 |
| TMEM99     | 1479.249868 | 0.25176232   | 0.079886735 | 3.151490917  | 0.001624392 | 0.012272588 |
| NBDS       | 778.9201243 | -0.465615557 | 0.147766957 | -3.151012682 | 0.001627054 | 0.012277861 |
| OST4       | 6441.401982 | 0.477896394  | 0.151665526 | 3.150988933  | 0.001627187 | 0.012279861 |
| POLR1D     | 2236.653463 | 0.38698431   | 0.1227984   | 3.150679749  | 0.00162891  | 0.012287835 |
| PCY1A      | 3553.956221 | 0.22787388   | 0.072330515 | 3.150452284  | 0.001630179 | 0.012292375 |
| NUOT16     | 5519.381146 | -0.34579642  | 0.109765126 | -3.150330453 | 0.001630859 | 0.012292473 |
| NDJFB11    | 4362.90103  | 0.526239906  | 0.167093343 | 3.149376842  | 0.001631691 | 0.012317547 |
| CHCHO1     | 1089.110721 | 0.423966427  | 0.134616648 | 3.149435323  | 0.001635863 | 0.012317547 |
| POBP1      | 3791.555524 | 0.500791402  | 0.159002871 | 3.149574579  | 0.001635084 | 0.012317547 |
| NCDR2      | 10700.60407 | -0.286374128 | 0.090941899 | -3.148981179 | 0.001638407 | 0.0123292   |
| COCL9      | 116.1334044 | -1.14368960  | 0.363209812 | -3.148156565 | 0.00164298  | 0.012358562 |
| NFAM1      | 1169.67932  | 0.75453522   | 0.239703738 | 3.147858793  | 0.001644711 | 0.012366537 |
| S100A4     | 44.42265163 | 0.89865813   | 0.314417658 | 3.147592977  | 0.001646207 | 0.012367695 |
| ACD72      | 1476.362317 | 0.387045711  | 0.122963215 | 3.147638201  | 0.001645953 | 0.012367695 |
| E1F3K      | 8052.396155 | 0.519630252  | 0.165104796 | 3.147275342  | 0.001647997 | 0.012376094 |
| BHLE4D     | 4089.582    | 0.575124212  | 0.182775927 | 3.146680093  | 0.001651762 | 0.012399316 |
| RG52       | 2318.072947 | 0.820007034  | 0.260666088 | 3.145814024  | 0.001656253 | 0.012427966 |
| ACY3       | 109.2840044 | -1.108138006 | 0.352356412 | -3.145502846 | 0.001658016 | 0.012435054 |
| ZSW1M1     | 405.0386819 | 0.307597291  | 0.097799856 | 3.145171217  | 0.001659897 | 0.012435054 |
| SSU72      | 5487.289424 | 0.352556333  | 0.112091058 | 3.145267251  | 0.001659352 | 0.012435054 |
| COL17A1    | 80.58245368 | 1.016181517  | 0.323068817 | 3.145361312  | 0.001658818 | 0.012435054 |
| SNX31      | 46.38485854 | -1.278052664 | 0.40650857  | -3.143981103 | 0.001666662 | 0.012475668 |
| TOMM22     | 3209.165059 | 0.35834903   | 0.113983755 | 3.143860536  | 0.001667349 | 0.012475668 |
| GPSP1      | 279.2221638 | 0.31548944   | 0.10035298  | 3.143901363  | 0.001667116 | 0.012475668 |
| BNLA4      | 776.893923  | 0.369321203  | 0.117450108 | 3.143728903  | 0.001668099 | 0.012476216 |
| GRN5       | 1467.890152 | 0.373128501  | 0.118744748 | 3.142273723  | 0.001676412 | 0.012533308 |
| MLL110     | 938.5357272 | -0.443811023 | 0.141255765 | -3.141896754 | 0.001678572 | 0.012544366 |
| NF13B      | 5840.970144 | -0.59502988  | 0.189474109 | -3.140428438 | 0.001687009 | 0.012602307 |
| NRAC       | 2400.89568  | 0.354596121  | 0.11292301  | 3.140158751  | 0.001688566 | 0.012602862 |
| MARVELD2   | 155.8730847 | 0.626072794  | 0.1993858   | 3.140006929  | 0.001689438 | 0.012612031 |
| ADPHL2     | 2216.494313 | 0.383187415  | 0.12204923  | 3.139613542  | 0.001691708 | 0.012622063 |
| ATP6P1L    | 330.0124332 | -0.404963641 | 0.129002805 | -3.139183303 | 0.001694194 | 0.012630929 |
| CAOM1      | 5144.823233 | -0.409569966 | 0.130470756 | -3.139170642 | 0.001694268 | 0.012630929 |
| LGMN       | 10233.08927 | 0.880928678  | 0.280663474 | 3.138736455  | 0.00169678  | 0.012639432 |
| FAM110D    | 180.0095902 | 0.845232546  | 0.269386099 | 3.138790112  | 0.001696649 | 0.012639432 |
| BNF15      | 1135.803862 | 0.354261191  | 0.112891379 | 3.138071241  | 0.001700635 | 0.012663034 |
| F12        | 221.876038  | 0.932805649  | 0.297296875 | 3.137623455  | 0.001703235 | 0.012672771 |
| S1CS5E1    | 2180.486094 | 0.386531649  | 0.123198669 | 3.137466708  | 0.00170415  | 0.012678957 |
| NRP12      | 1401.115476 | 0.398953063  | 0.127171136 | 3.137135134  | 0.001706074 | 0.012688148 |
| LRRC47     | 3494.390422 | 0.309048302  | 0.098518066 | 3.136970915  | 0.001707011 | 0.012690144 |
| CKANAZD1   | 379.698102  | 0.7660442    | 0.244245428 | 3.136756016  | 0.001708282 | 0.012694328 |
| NKX2       | 974.5949803 | 0.470805462  | 0.150126616 | 3.13605591   | 0.001712366 | 0.012719542 |
| CHMP4B     | 8263.906795 | 0.339146914  | 0.108172413 | 3.135244037  | 0.001717112 | 0.012744526 |
| VSIG10L    | 270.4790526 | 0.430940947  | 0.137447828 | 3.135305662  | 0.001716752 | 0.012744526 |
| MSR81      | 1481.725079 | 0.412791258  | 0.131669756 | 3.135049919  | 0.001718249 | 0.012747828 |
| SERPINB6   | 10632.79924 | 0.56695711   | 0.180914678 | 3.133836884  | 0.001725367 | 0.012795487 |
| NFSD10     | 3581.331518 | 0.397962963  | 0.127001595 | 3.133527278  | 0.001727189 | 0.012803845 |
| TT12       | 431.0356168 | 0.315658459  | 0.100756893 | 3.132872114  | 0.001731048 | 0.012827299 |
| P1THD1     | 4939.460779 | 0.32525634   | 0.103839108 | 3.132310616  | 0.001734363 | 0.012846693 |
| NF5A1      | 1531.113966 | -0.609617241 | 0.194674088 | -3.131476036 | 0.00173993  | 0.012878086 |
| WDR55      | 1791.89782  | 0.229657708  | 0.073342568 | 3.131302053  | 0.001740328 | 0.012880523 |
| NUJ1       | 3219.00504  | 0.264191025  | 0.084385107 | 3.130772884  | 0.001743444 | 0.012888023 |
| AP012      | 5166.037402 | 0.609458887  | 0.194341473 | 3.130875144  | 0.001742862 | 0.012888023 |
| NDSDP      | 3513.522548 | 0.781228391  | 0.249518175 | 3.130947641  | 0.001742431 | 0.012888023 |
| ZNF882     | 805.7296144 | -0.416499725 | 0.133043869 | -3.130544558 | 0.001744826 | 0.012881004 |
| AL358113.1 | 689.6026843 | -0.635148199 | 0.202848045 | -3.12960984  | 0.001750386 | 0.012929005 |
| PP1B       | 15676.25252 | 0.607656241  | 0.194195931 | 3.129088425  | 0.001753495 | 0.012946783 |
| FUT8       | 3065.559001 | -0.652220257 | 0.208482449 | -3.128418055 | 0.0017575   | 0.012971153 |
| KLH21      | 3995.446409 | 0.427767185  | 0.136770333 | 3.127631373  | 0.001762211 | 0.013000711 |
| SWIS       | 1162.108967 | 0.555583366  | 0.177667901 | 3.127089148  | 0.001765464 | 0.013019091 |
| SWT1       | 276.9821924 | -0.393346862 | 0.125803957 | -3.126808332 | 0.001767151 | 0.01302673  |
| ATP6V0E1   | 7582.945586 | 0.506326969  | 0.161938317 | 3.12666563   | 0.001768009 | 0.013027843 |
| FKTN       | 1067.500495 | -0.425877752 | 0.136225691 | -3.126266037 | 0.001770413 | 0.013036057 |
| GENR       | 2023.102154 | 0.216923728  | 0.069387942 | 3.126245244  | 0.001770538 | 0.013036057 |
| CDPT       | 4136.135067 | 0.298746244  | 0.095575982 | 3.125746005  | 0.001773547 | 0.013052991 |
| KEAP1      | 4828.29441  | 0.293960182  | 0.094063145 | 3.125136644  | 0.001777225 | 0.013074841 |
| CC3A2S1E2  | 3177.479513 | -0.424480904 | 0.135836583 | -3.124983354 | 0.001778423 | 0.013076544 |
| TRR        | 9469.655107 | 0.486151645  | 0.155675319 | 3.124863599  | 0.001778875 | 0.013076544 |
| ZNF37A     | 1282.199103 | -0.320753637 | 0.102661051 | -3.124394647 | 0.001781713 | 0.013092181 |
| VPS28      | 7319.233477 | 0.45015741   | 0.144118753 | 3.123517237  | 0.001787034 | 0.013126046 |
| EFHD1      | 11369.54363 | -0.723046992 | 0.231540733 | -3.122763683 | 0.001791615 | 0.013154019 |
| FAMG19A    | 6720.537884 | -0.357943509 | 0.114627897 | -3.122656166 | 0.00179227  | 0.013154019 |
| CEP192     | 1347.258336 | -0.497425418 | 0.159319112 | -3.122195527 | 0.001795077 | 0.013169373 |
| LACTB      | 950.2536374 | 0.576893999  | 0.184858261 | 3.120736918  | 0.001803991 | 0.013229098 |
| TCIRG1     | 3151.816428 | 0.732096859  | 0.234602825 | 3.120579888  | 0.001804953 | 0.013231299 |
| DVSM       | 344.5670468 | 0.309651637  | 0.097327233 | 3.119904146  | 0.001809099 | 0.013256416 |
| AVIL       | 865.7670593 | -1.081305499 | 0.346626861 | -3.119508676 | 0.001811529 | 0.013268948 |
| ZNF536     | 2414.980409 | -0.810952811 | 0.259976556 | -3.119330541 | 0.001812625 | 0.013271698 |
| NKRN1      | 3873.992814 | 0.182991946  | 0.058669196 | 3.119064651  | 0.001814374 | 0.013279226 |
| SH2D       | 119.7997011 | 1.110015338  | 0.359295881 | 3.118646266  | 0.001816339 | 0.013291994 |
| ACD04832.3 | 100.4117046 | 1.70542175   | 0.407604446 | 3.118077314  | 0.00182035  | 0.013313996 |
| BHD1       | 4444.192724 | 0.53509675   | 0.171631399 | 3.117709019  | 0.001822627 | 0.013323754 |
| TRP1       | 5068.347883 | 0.70542602   | 0.226342246 | 3.117149493  | 0.00182609  | 0.013333845 |
| TRPS       | 5642.390338 | 0.630538517  | 0.202724276 | 3.117245155  | 0.001825497 | 0.013333845 |
| SLC34A2    | 102.167731  | 1.29605128   | 0.416113224 | 3.116712117  | 0.001828801 | 0.013352998 |
| SAR1B      | 3628.243426 | -0.335821102 | 0.107815029 | -3.114789322 | 0.001840763 | 0.013432341 |
| LPAR1      | 11222.63987 | -0.828603415 | 0.266047191 | -3.114497886 | 0.001842583 | 0.013432341 |
| PLTP       | 18343.81742 | 0.739109162  | 0.237303852 | 3.114610889  | 0.001841877 | 0.013432341 |
| PSMD7      | 3990.551334 | 0.272732565  | 0.087646009 | 3.114643774  | 0.001841672 | 0.013432341 |
| C5orf58    | 4.024090348 | -1.845534917 | 0.592663396 | -3.113968113 | 0.001845894 | 0.013451162 |
| SPAG8      | 337.575142  | -0.717248007 | 0.230351674 | -3.113708882 | 0.001847518 | 0.013457672 |
| CL9orf25   | 2599.45176  | 0.483180978  | 0.155199906 | 3.113401419  | 0.001849443 | 0.013466637 |
| CENPO      | 328.2739009 | -0.52091336  | 0.177341019 | -3.113162082 | 0.001850943 | 0.013471236 |
| SELENON    | 7161.72878  | 0.339155271  | 0.108945888 | 3.113061688  | 0.001851573 | 0.013471236 |
| TYROBP     | 10586.54728 | 0.016818038  | 0.294518066 | 3.112943214  | 0.001852316 | 0.013471236 |
| WDR27      | 612.4346992 | -0.371306024 | 0.112929192 | -3.11258305  | 0.001854578 | 0.013471236 |
| NFSD13A    | 713.7621724 | 0.385246653  | 0.123789396 | 3.112584088  | 0.001854572 | 0.013471236 |
| SPDK       | 1477.523621 | -0.522143353 | 0.167763354 | -3.112807255 | 0.001855853 | 0.013481085 |
| DST        | 29061.20717 | -0.672878569 | 0.216223192 | -3.111962981 | 0.001858478 | 0.013494839 |
| PNISR      | 4966.239524 | -0.419945206 | 0.135006789 | -3.110548806 | 0.0018674   | 0.013541426 |
| DOCK5      | 4808.132718 | -0.749674579 | 0.241024699 | -3.11036414  | 0.001868568 | 0.013541426 |
| GGH        | 948.5838662 | 0.708341532  | 0.227733936 | 3.110390773  | 0.00186884  | 0.013541426 |
| ATO8B      | 1184.656193 | 0.545743284  | 0.175449987 | 3.110534769  | 0.001867489 | 0.013541426 |
| TRAPPC1    | 4629.772674 | 0.507447356  | 0.16312538  | 3.110781152  | 0.001865932 | 0.013541426 |
| SPOCD1     | 6794.012079 | 1.241579397  | 0.399295292 | 3.109425684  | 0.001874509 | 0.013563141 |
| NAAG50     | 3019.260469 | 0.260512328  | 0.083780054 | 3.109479135  | 0.001874175 | 0.013563141 |
| BNF        | 946.955587  | 0.79012426   | 0.254101248 | 3.109485946  | 0.001874132 | 0.013563141 |
| E01        | 2148.76803  | 0.466853671  | 0.149804059 | 3.109753411  | 0.001872436 | 0.013563141 |
| CKF4       | 1244.438016 | 0.771146203  | 0.248033021 | 3.108784574  | 0.001878588 | 0.013587311 |
| BMCH9      | 305.5183722 | -0.468046458 | 0.15058059  |              |             |             |

|               |             |              |              |              |             |             |
|---------------|-------------|--------------|--------------|--------------|-------------|-------------|
| COLM6         | 80.4561970  | 1.03183726   | 0.332090121  | 1.107100188  | 0.001889224 | 0.013643552 |
| GSOWC         | 48.9510670  | -0.944912023 | 0.304126508  | -1.105966215 | 0.001890118 | 0.01364439  |
| PHLEDBA       | 608.1950409 | -0.22540855  | 0.072595341  | -1.106822757 | 0.001891097 | 0.013645668 |
| ELMO2         | 4078.116032 | -0.240471697 | 0.077413246  | -1.106337871 | 0.001894201 | 0.013659844 |
| CCDC102A      | 362.4333079 | 0.606282492  | 0.195179329  | 3.106284333  | 0.001894544 | 0.013659844 |
| ZNFS18A       | 1199.461647 | -0.582764851 | 0.187619028  | -3.106107399 | 0.001895679 | 0.013662675 |
| LRWDL         | 1822.041189 | 0.41348892   | 0.133317104  | 3.105737668  | 0.00189805  | 0.01367442  |
| MDG5          | 1912.649101 | 0.286982173  | 0.092429836  | 3.104865105  | 0.001903658 | 0.013709464 |
| NAAG5         | 1151.940372 | -0.415472259 | 0.133829446  | -3.104527979 | 0.001905829 | 0.013719736 |
| NLRCS         | 1700.263302 | -0.538429013 | 0.173482816  | -3.103644638 | 0.001911528 | 0.013753587 |
| LTBAR         | 749.338282  | 0.586490904  | 0.189056506  | 3.102192444  | 0.00192093  | 0.013817653 |
| STAR03        | 1200.378979 | -0.419280599 | 0.135175348  | -3.101753134 | 0.001932783 | 0.013827379 |
| TNFRS108      | 2132.405044 | 0.605983326  | 0.195364072  | 3.101815594  | 0.001933777 | 0.013827379 |
| FAM62A        | 2845.907111 | 0.376220272  | 0.121339804  | 3.100551168  | 0.001931608 | 0.013878211 |
| SLCS581       | 2172.42781  | 0.279361241  | 0.090107708  | 3.100303598  | 0.001933224 | 0.013884404 |
| CSF1          | 5203.545728 | 0.581060478  | 0.187430112  | 3.10014471   | 0.001934261 | 0.013886441 |
| CYSLTR1       | 194.046302  | -0.43474491  | 0.139849914  | -1.099561653 | 0.001938072 | 0.013908386 |
| ALG13         | 1323.12029  | -0.288018731 | 0.092524327  | -1.099252769 | 0.001940094 | 0.013917476 |
| TOR3A         | 1846.369614 | 0.418891825  | 0.135179628  | 3.098779249  | 0.001943197 | 0.013934314 |
| INTU          | 1152.003198 | -0.561187056 | 0.181157522  | -3.097785005 | 0.001949728 | 0.013975706 |
| SUPT5H        | 8456.532991 | 0.237016418  | 0.076526885  | 3.097165376  | 0.001953808 | 0.013999508 |
| GOT2          | 4862.327064 | 0.315611222  | 0.101919876  | 3.096660194  | 0.001957141 | 0.014017936 |
| TL44          | 2614.040557 | -0.428881396 | 0.138534467  | -3.095846115 | 0.001962522 | 0.014051014 |
| LPARS         | 868.9312352 | -0.852770368 | 0.275496328  | -3.095396492 | 0.00196555  | 0.014066871 |
| NSUN5         | 1571.298756 | 0.460870385  | 0.148899156  | 3.095184666  | 0.001966904 | 0.014071457 |
| BOLA2         | 557.9943308 | 0.512951588  | 0.165607316  | 3.094981548  | 0.001968251 | 0.014075633 |
| NAV2          | 3132.252133 | -0.533861825 | 0.178982607  | -3.094500818 | 0.001971444 | 0.014090095 |
| KIAM755       | 9075.0722   | -0.588707841 | 0.190274654  | -3.094446813 | 0.001971803 | 0.014090095 |
| CRP2          | 9235.867231 | 0.497398265  | 0.160787077  | 3.093521793  | 0.00197798  | 0.014113616 |
| NGF84         | 2825.959852 | 0.754255563  | 0.243840938  | 3.093227765  | 0.001979921 | 0.014137143 |
| BCL2L12       | 349.9188229 | 0.558053953  | 0.180506919  | 3.091991144  | 0.001990855 | 0.014204208 |
| CDC37         | 9245.151371 | 0.385531269  | 0.124700668  | 3.091653599  | 0.00199045  | 0.014204208 |
| MED3          | 8707.247316 | 0.459633674  | 0.148697879  | 3.091057354  | 0.001994451 | 0.014223357 |
| PLAZG15       | 2324.82912  | 0.505760467  | 0.163631901  | 3.090842711  | 0.001995893 | 0.014229136 |
| ENO3          | 399.7282164 | 0.611232671  | 0.197778667  | 3.090488378  | 0.001998276 | 0.014240616 |
| GDF3          | 2.640373352 | 3.434553126  | 1.111377058  | 3.09035813   | 0.001999153 | 0.014241356 |
| KANS1L1       | 463.2738579 | -0.516894207 | 0.167294108  | -3.089733482 | 0.002003362 | 0.014265823 |
| PHF8          | 1301.64332  | -0.380608405 | 0.123209923  | -3.089120175 | 0.002007502 | 0.014289787 |
| ERAL1         | 2716.158106 | 0.281841861  | 0.091261782  | 3.088279179  | 0.002013192 | 0.014324578 |
| PACRG1        | 524.5375204 | -0.317350568 | 0.10277903   | -3.087698606 | 0.002017129 | 0.014347231 |
| ALPK1         | 815.7226997 | -0.570842669 | 0.184888374  | -3.087499001 | 0.002018484 | 0.014351331 |
| PTDS1         | 2508.625558 | 0.330611709  | 0.10713933   | 3.08581144   | 0.002020975 | 0.014427463 |
| BTNA          | 19581.01069 | -0.671105489 | 0.217654301  | -3.084771324 | 0.00203708  | 0.014466802 |
| SONM1         | 2046.24649  | 0.444771043  | 0.144178176  | 3.084607088  | 0.002036406 | 0.014466802 |
| BERL3         | 152.5883672 | -0.66969466  | 0.21711556   | -1.084502396 | 0.00203893  | 0.014474359 |
| RPS26         | 9587.393442 | 0.654098754  | 0.212068065  | 3.084381209  | 0.00203976  | 0.014474681 |
| DIP2C         | 2813.773144 | -0.545433205 | 0.176852092  | -3.084007657 | 0.002042323 | 0.014483665 |
| ARSD1         | 1385.285719 | 0.411359661  | 0.133386505  | 3.083967761  | 0.002042598 | 0.014483665 |
| CYFIP1        | 6132.008771 | -0.417727654 | 0.135463369  | -3.083694552 | 0.002044474 | 0.014491388 |
| GUTUDA        | 1693.213981 | -0.760452872 | 0.246626417  | -3.083420181 | 0.00204636  | 0.01449918  |
| CNN3          | 14818.96879 | -0.434631567 | 0.140965039  | -3.083257872 | 0.002047476 | 0.014501516 |
| KCTD8         | 3691.316    | -0.430125704 | 0.139538146  | -3.082496121 | 0.002052724 | 0.014533097 |
| BU5P11        | 672.6617216 | 0.437540324  | 0.141970857  | 3.081905922  | 0.002056798 | 0.01455633  |
| RPL12         | 26726.95423 | 0.46996257   | 0.152506506  | 3.081590311  | 0.00205898  | 0.014566197 |
| CCDC70        | 2.652360292 | 2.391595788  | 0.7761657    | 3.081295379  | 0.002061021 | 0.014575039 |
| SDF2          | 2018.080149 | 0.335812959  | 0.10899183   | 3.081089415  | 0.002062447 | 0.014579531 |
| AP013         | 1109.029407 | 0.683825712  | 0.221069908  | 3.080719226  | 0.002065013 | 0.014593071 |
| NLAG          | 14.48197522 | 1.454831818  | 0.472278599  | 3.080452558  | 0.002068663 | 0.014599548 |
| ANSS          | 1155.956667 | -0.653481949 | 0.212154245  | -1.080220944 | 0.002068471 | 0.014602599 |
| NEU3          | 795.1207931 | 0.382611327  | 0.12421792   | 3.080162072  | 0.00206888  | 0.014602599 |
| WASF2         | 6823.786278 | -0.310498848 | 0.100812392  | -3.079937299 | 0.002070442 | 0.014608029 |
| WRM5          | 2929.812238 | 0.26406563   | 0.08574443   | 3.079682618  | 0.002072213 | 0.014609339 |
| BECN1         | 3403.248907 | 0.173922136  | 0.056474016  | 3.079684205  | 0.002072202 | 0.014609339 |
| CLCN7         | 7976.615093 | 0.324698893  | 0.105436988  | 3.079554025  | 0.002073108 | 0.014610058 |
| HSBP2-C1orf52 | 463.7333087 | 0.758166546  | 0.24621616   | 3.079204044  | 0.002075545 | 0.014621642 |
| DLG1          | 5208.184432 | -0.645567648 | 0.209715698  | -3.078299117 | 0.002081858 | 0.014660515 |
| BRAT1         | 3546.110029 | 0.399602411  | 0.12887301   | 3.076870326  | 0.002091863 | 0.01472534  |
| UQC9Q         | 6767.951369 | 0.504756352  | 0.1640958265 | 3.076895971  | 0.002093132 | 0.014728645 |
| GIT2          | 2678.980455 | -0.20379453  | 0.066231452  | -3.076475693 | 0.002094634 | 0.01473395  |
| SUPT5H        | 288.35380   | -0.552423191 | 0.179570433  | -3.076359416 | 0.002095451 | 0.014733714 |
| DDX1          | 4329.43231  | 0.723505475  | 0.234903998  | 3.075747884  | 0.002099753 | 0.014749793 |
| SSBP2         | 1536.426704 | -0.453734308 | 0.147520825  | -3.075731156 | 0.002099871 | 0.014749793 |
| USG1          | 1572.457192 | 0.247038978  | 0.080319644  | 3.075699129  | 0.002100139 | 0.014749793 |
| MAGOH         | 893.0399994 | 0.388047748  | 0.126177119  | 3.075420876  | 0.002102057 | 0.014757641 |
| C1orf112      | 363.5242544 | -0.341509709 | 0.111049714  | -3.075286716 | 0.002103003 | 0.014758659 |
| SLC18A1       | 33.7298884  | 1.274687809  | 0.414546715  | 3.074895449  | 0.002105764 | 0.014772408 |
| UPB1          | 62.3660111  | 0.99761344   | 0.324637047  | 3.073011689  | 0.002115102 | 0.014860323 |
| TMCC1         | 1632.613877 | -0.300374667 | 0.097764127  | -3.072442576 | 0.002123147 | 0.014877454 |
| ZBTB48        | 1294.917245 | 0.433426477  | 0.141069106  | 3.072440806  | 0.002123159 | 0.014877454 |
| CCDC88B       | 2423.68909  | 0.679769032  | 0.221295173  | 3.07177523   | 0.002127899 | 0.014904998 |
| TYMP          | 7215.903825 | 0.973154332  | 0.316863899  | 3.071206079  | 0.002131959 | 0.014927767 |
| NCF1          | 1279.369088 | 0.850993307  | 0.277102978  | 3.071036306  | 0.002133172 | 0.014930584 |
| SLC13A3       | 1614.318645 | -0.69143105  | 0.22516327   | -3.070798584 | 0.002134871 | 0.014934534 |
| CLNK          | 10.8716979  | -0.872939545 | 0.284277476  | -3.070730608 | 0.002135357 | 0.014934534 |
| CRSD          | 1391.345885 | 0.404111837  | 0.131614992  | 3.07040979   | 0.002137653 | 0.014949916 |
| C1orf85       | 12.0774316  | 1.425801602  | 0.464386283  | 3.070292242  | 0.002138494 | 0.014949916 |
| CY5S1         | 1502.964864 | 0.539213258  | 0.175644228  | 3.069986848  | 0.002140811 | 0.014955565 |
| NEKS          | 109.8806024 | -0.747548111 | 0.243516934  | -1.069799297 | 0.002142027 | 0.014958472 |
| RIOK1         | 716.3095671 | 0.314135534  | 0.102336336  | 3.069638781  | 0.002143182 | 0.014960869 |
| CCDC155       | 8.571938048 | -0.973198761 | 0.317072952  | -3.06932129  | 0.002145457 | 0.014971083 |
| SUPT4H1       | 3188.093836 | 0.274430865  | 0.089434123  | 3.068525241  | 0.002151182 | 0.015003346 |
| TCTA          | 2347.574762 | -0.385071678 | 0.125497748  | -3.068355293 | 0.002152405 | 0.015005554 |
| HP1           | 4976.011834 | -0.469416343 | 0.152889312  | -3.068295002 | 0.00215284  | 0.015005554 |
| SOW4H         | 146.0317688 | 0.888938361  | 0.28979025   | 3.067523357  | 0.002158406 | 0.015038663 |
| SNRP          | 1712.076189 | 0.491722546  | 0.160325199  | 3.067032194  | 0.002161956 | 0.015057703 |
| UNKL          | 1244.230583 | -0.278080389 | 0.090676744  | -3.06672226  | 0.002164198 | 0.015057811 |
| TNFR1P1       | 3403.931371 | 0.327437507  | 0.106772242  | 3.066691335  | 0.002164422 | 0.015057811 |
| KLH12         | 2137.65534  | 0.203535578  | 0.066367562  | 3.066793018  | 0.002163686 | 0.015057811 |
| EIF3D         | 1738.407137 | 0.195898463  | 0.063894687  | 3.065955886  | 0.002169723 | 0.015083359 |
| FATE1         | 18.34576021 | 1.556043948  | 0.637881975  | 3.065986227  | 0.002169533 | 0.015083359 |
| RHO1          | 8572.37543  | -0.599388005 | 0.195522954  | -1.065563576 | 0.002172602 | 0.015089437 |
| TCP           | 1040.495002 | -0.398061321 | 0.129867866  | -1.065125591 | 0.002175786 | 0.015089437 |
| DNMT          | 0.831781968 | -2.071016209 | 0.675676484  | -3.065100323 | 0.002175997 | 0.015089437 |
| PROSER2       | 47.76619465 | 0.888571924  | 0.289904562  | 3.065049814  | 0.002176337 | 0.015089437 |
| STX5          | 2239.290351 | 0.397574699  | 0.129706381  | 3.065189781  | 0.002175318 | 0.015089437 |
| ODC1          | 4221.971788 | 0.687218578  | 0.224197523  | 3.065237155  | 0.002174975 | 0.015089437 |
| YIPF3         | 5667.538412 | 0.35464955   | 0.115698842  | 3.065281768  | 0.00217465  | 0.015089437 |
| ATP6V1B2      | 9958.11053  | 0.37865827   | 0.12355501   | 3.064693772  | 0.00217893  | 0.015096051 |
| MKN2          | 4140.431207 | 0.380688024  | 0.124213566  | 3.064786211  | 0.002178256 | 0.015096051 |
| SMK5          | 926.3489606 | -0.339106731 | 0.110661582  | -3.064358235 | 0.002181375 | 0.015096284 |
| ALDH8A1       | 175.6981083 | -0.630360288 | 0.205707284  | -3.064355699 | 0.002181394 | 0.015096284 |
| PANK1         | 272.626028  | 0.69177825   | 0.22587093   | 3.064351994  | 0.002181421 | 0.015096284 |
| LIN37         | 654.9941789 | 0.402515091  | 0.131364838  | 3.064120698  | 0.002183254 | 0.015103299 |
| TRAPPC4       | 2074.51596  | 0.305602303  | 0.098744958  | 3.063471785  | 0.00218     |             |

|           |             |              |             |              |             |             |
|-----------|-------------|--------------|-------------|--------------|-------------|-------------|
| BPDR1     | 4281.103960 | 0.421082647  | 0.137474497 | 1.062987365  | 0.002191393 | 0.015136879 |
| PHGC      | 1100.088127 | 0.308359907  | 0.100684623 | 1.062543001  | 0.002194649 | 0.015151608 |
| ANG1      | 2401.249187 | -0.391210921 | 0.127788116 | -1.061882211 | 0.00219995  | 0.015181402 |
| ZTP57     | 72.97727524 | 2.092588425  | 0.683488834 | 1.061627815  | 0.00220137  | 0.01518871  |
| DOD1      | 3020.066401 | -0.226651245 | 0.074049255 | -3.060817369 | 0.002207337 | 0.015210717 |
| COLLEC12  | 3063.152904 | -0.688684554 | 0.225005435 | -3.060746302 | 0.002207861 | 0.015210717 |
| UFP38     | 959.3815884 | 0.27050895   | 0.09051598  | 3.060759391  | 0.002207499 | 0.015210717 |
| TGFBI     | 5434.0124   | 0.937909196  | 0.306413738 | 3.06092411   | 0.00220655  | 0.015210717 |
| CYP2E1    | 227.8761924 | -0.621099902 | 0.202936099 | -3.060588842 | 0.00220917  | 0.015214046 |
| NDE1      | 1501.498734 | -0.559794524 | 0.182914843 | -3.060410593 | 0.002210337 | 0.015214983 |
| ADH5      | 4874.926639 | 0.68444123   | 0.087717473 | 3.060326687  | 0.002210957 | 0.015214983 |
| UIBP1     | 173.5199087 | 0.991138548  | 0.323903398 | 3.059981943  | 0.002213503 | 0.015226821 |
| OR6N1     | 2.215537318 | 3.87180638   | 1.265460362 | 3.059630305  | 0.002216305 | 0.015240047 |
| NIT2      | 1617.800771 | 0.234570612  | 0.076692506 | 1.058586073  | 0.002223842 | 0.015286528 |
| SIRT4     | 65.46553307 | 0.726328187  | 0.237629373 | 3.05655899   | 0.002238933 | 0.015288539 |
| WAZN      | 4839.26442  | -0.495914588 | 0.162257571 | -3.055342205 | 0.002240549 | 0.015289889 |
| TLL4      | 2156.778991 | -0.286251611 | 0.092666323 | -1.056078252 | 0.002242527 | 0.015292005 |
| FAM104A   | 1478.36874  | 0.243282711  | 0.079621196 | 1.056079721  | 0.002242516 | 0.015292005 |
| NAL       | 20.25286073 | 1.333891502  | 0.436627105 | 3.054990142  | 0.002250679 | 0.015442207 |
| FZRL2     | 164.6348018 | 1.086019582  | 0.35596237  | 3.054080638  | 0.002257514 | 0.015483336 |
| ADSL      | 1588.530592 | 0.313685371  | 0.102716219 | 3.053903026  | 0.002258851 | 0.015486742 |
| DUSP2     | 308.2729687 | 0.103888661  | 0.338560431 | 3.053778788  | 0.002259786 | 0.015487399 |
| PTX3      | 1169.126879 | 1.275037005  | 0.417611634 | 3.053164474  | 0.002264418 | 0.015513367 |
| DNITP1    | 1561.602788 | 0.379315215  | 0.124302147 | 3.051558023  | 0.00227657  | 0.015590827 |
| PCSK5     | 1173.622955 | 0.789747264  | 0.258870008 | 3.05074841   | 0.002282718 | 0.015627119 |
| Czof81    | 383.0297968 | 0.522591961  | 0.171334074 | 3.050134555  | 0.002287389 | 0.015653286 |
| UCH3      | 842.9613707 | 0.36565956   | 0.120192896 | 3.049843811  | 0.002289604 | 0.015656814 |
| RPS15     | 25790.07637 | 0.523704652  | 0.171770111 | 3.049515078  | 0.002289908 | 0.015656814 |
| RBP1_20   | 3981.06001  | 0.463056911  | 0.151839144 | 3.049554385  | 0.002291048 | 0.01566098  |
| NR2C1     | 1104.481152 | -0.27320377  | 0.089613027 | -3.048705978 | 0.002298239 | 0.015692939 |
| RBP1      | 989.0403598 | 0.537302225  | 0.176236064 | 3.048764335  | 0.002297847 | 0.015692939 |
| CEN1A     | 2754.488972 | 0.408972396  | 0.134140441 | 3.048837424  | 0.002297288 | 0.015692939 |
| LRRIC37A2 | 482.9007954 | -0.334866762 | 0.109851108 | -3.048369461 | 0.002300869 | 0.015693283 |
| OPALIN    | 7548.098503 | -1.211928658 | 0.397579227 | -3.04826957  | 0.002301634 | 0.015693283 |
| NDUFC1    | 2297.963583 | 0.345197532  | 0.113244331 | 3.048254408  | 0.002301375 | 0.015693283 |
| RPL18A    | 25404.22534 | 0.505410284  | 0.165794806 | 3.048408427  | 0.00230057  | 0.015693283 |
| ZNF326    | 2015.338612 | -0.383999477 | 0.125887457 | -3.047918313 | 0.002304326 | 0.01569923  |
| AP0BEC3G  | 901.0403172 | 0.755713512  | 0.247943206 | 3.047929898  | 0.002304237 | 0.01569923  |
| SHF1      | 13010.85714 | -0.735596744 | 0.24138682  | -3.047377419 | 0.002308477 | 0.015718974 |
| TTC13     | 911.3408453 | -0.217112053 | 0.07124692  | -3.047318458 | 0.002308929 | 0.015718974 |
| PARP1     | 9268.790566 | -0.314978675 | 0.103373512 | -3.046995978 | 0.002311408 | 0.01572423  |
| DNAA2     | 3440.556402 | 0.19536227   | 0.064115983 | 3.047019289  | 0.002311229 | 0.01572423  |
| PRK6      | 13838.35861 | 0.398114171  | 0.130735632 | 3.046716211  | 0.00231356  | 0.015733063 |
| FAR1      | 4134.350822 | -0.474879628 | 0.155905767 | -3.045940461 | 0.002319538 | 0.015767893 |
| MFSD12    | 5489.067321 | 0.505337251  | 0.16591738  | 3.045718175  | 0.002321253 | 0.015777396 |
| FAM93A    | 1979.077861 | -0.262823007 | 0.086297903 | -3.045511788 | 0.002326292 | 0.015777698 |
| FAM114A   | 1504.825751 | -0.415901179 | 0.136589063 | -3.044908354 | 0.002327512 | 0.015804523 |
| ATF3      | 1829.049271 | 0.746291066  | 0.245103934 | 3.044799292  | 0.002328356 | 0.015804523 |
| EXOC8     | 823.8845064 | 0.234566967  | 0.0770572   | 3.044062357  | 0.002334063 | 0.015837423 |
| ARHGAP1   | 6060.805583 | -0.33155733  | 0.108933422 | -3.043669657 | 0.002337116 | 0.015843998 |
| INTS6L    | 562.9209748 | -0.477653618 | 0.15693567  | -3.043626852 | 0.002337449 | 0.015843998 |
| OR6I1     | 59.16787885 | -0.504292936 | 0.165689297 | -3.043605981 | 0.002337611 | 0.015843998 |
| PFN1      | 27447.02207 | 0.564428687  | 0.185471353 | 3.043212121  | 0.002340672 | 0.015858914 |
| CAV2      | 1277.917545 | 0.580156477  | 0.190729108 | 3.041782569  | 0.002351817 | 0.015928569 |
| XRN1      | 1145.969262 | -0.469062226 | 0.154229064 | -3.040971755 | 0.00235816  | 0.015954417 |
| TUBGCP3   | 1171.12134  | -0.318928832 | 0.104877591 | -3.040962577 | 0.002358231 | 0.015954417 |
| NDP1      | 619.0592416 | 1.004796311  | 0.330418243 | 3.040983156  | 0.00235807  | 0.015954417 |
| CRSPLD1   | 1634.417838 | -0.91568527  | 0.301142077 | -3.040710479 | 0.002362027 | 0.015964392 |
| RBM8      | 5716.26774  | -0.31294203  | 0.102950233 | -3.03966426  | 0.002368416 | 0.016011567 |
| ST18      | 3669.931887 | -0.910424494 | 0.299675088 | -3.038038621 | 0.002381234 | 0.016092324 |
| KONK17    | 7.120014771 | -1.37227888  | 0.451740139 | -3.037759479 | 0.002383441 | 0.016094645 |
| MMP21     | 9.173448117 | -1.153915799 | 0.379868139 | -3.037674609 | 0.002384112 | 0.016094645 |
| UBASH3A   | 16.93218373 | -1.283701531 | 0.422594998 | -3.037663807 | 0.002384198 | 0.016094645 |
| TM6B8     | 2380.656788 | 0.523798422  | 0.172478961 | 3.036883033  | 0.002390382 | 0.016130483 |
| POCL3     | 982.8235763 | 0.35925845   | 0.118304936 | 3.036715634  | 0.002391171 | 0.016133533 |
| LIPE      | 3124.867426 | -0.739682685 | 0.243591191 | -3.036574037 | 0.002392833 | 0.016135209 |
| DIABLO    | 3032.519061 | 0.29366166   | 0.096743735 | 3.035459189  | 0.002401697 | 0.016183137 |
| TPG51     | 1421.419948 | 0.586779292  | 0.193307394 | 3.035472574  | 0.002401591 | 0.016183137 |
| RGS1      | 4532.392013 | -0.101990526 | 0.336042882 | -3.035288706 | 0.002402976 | 0.016183888 |
| CS        | 2.102375582 | -1.32579492  | 0.43809041  | -3.03517938  | 0.002403927 | 0.016183888 |
| NRS18BP1  | 447.4216503 | 0.530187041  | 0.174690483 | 3.035008163  | 0.002405292 | 0.016183888 |
| VSTM1     | 90.42947644 | 0.809637698  | 0.260764409 | 3.03502023   | 0.002405132 | 0.016183888 |
| SRSF6     | 7396.998933 | -0.23810174  | 0.078459723 | -3.034700254 | 0.002407749 | 0.016191518 |
| SP6       | 75.03618308 | 1.145554113  | 0.377492326 | 3.03464123   | 0.002408213 | 0.016191518 |
| ADPH      | 785.0305514 | 0.590283419  | 0.194539689 | 3.034257026  | 0.002411289 | 0.016206289 |
| FEMC1     | 2204.016038 | 0.380171733  | 0.12529434  | 3.034123997  | 0.002412305 | 0.016207206 |
| SCYL1     | 4706.902957 | 0.349561924  | 0.115238887 | 3.033367758  | 0.002418407 | 0.016242281 |
| NSMCE1    | 2998.508283 | 0.533509358  | 0.17893341  | 3.032450506  | 0.002425769 | 0.016285789 |
| ACAP1     | 354.4627388 | 0.747305729  | 0.246465521 | 3.03209035   | 0.002428665 | 0.016292929 |
| RELT      | 1509.626113 | 0.415879547  | 0.137164349 | 3.031979878  | 0.002429554 | 0.016299327 |
| GN5       | 4611.598689 | 0.447097583  | 0.147478409 | 3.031613828  | 0.002432502 | 0.016313165 |
| LAVCL1    | 10518.20535 | -0.586573399 | 0.193506916 | -3.031278733 | 0.002435203 | 0.016313472 |
| KRT15     | 26.29627428 | 1.133568141  | 0.373950964 | 3.0313283    | 0.002434804 | 0.016313472 |
| CLCF1     | 675.9716611 | 1.12605108   | 0.371457996 | 3.031143613  | 0.002433934 | 0.016313472 |
| NOG       | 149.8550709 | 0.749651321  | 0.247131977 | 3.03099631   | 0.002431794 | 0.016315787 |
| FARP2     | 1663.762399 | -0.318446812 | 0.105087718 | -3.03029523  | 0.002441148 | 0.016342929 |
| OGFOID    | 1162.254421 | 0.38157905   | 0.111590029 | 3.030395204  | 0.002442628 | 0.016342929 |
| BUD1      | 4475.700342 | 0.467513823  | 0.154270723 | 3.030476638  | 0.002441681 | 0.016342929 |
| PROC      | 42.87077086 | 0.807913609  | 0.266625416 | 3.030144769  | 0.002444365 | 0.016345142 |
| FRMD8     | 2575.583304 | -0.644700641 | 0.21278877  | -3.029768158 | 0.002447415 | 0.0163599   |
| AGTFRP1   | 2321.479384 | -0.545039494 | 0.179926854 | -3.029228167 | 0.002451794 | 0.016382929 |
| RBM8      | 933.0531932 | -0.251084992 | 0.082894323 | -3.028976938 | 0.002453834 | 0.016390616 |
| CEN3      | 3535.414804 | 0.313047229  | 0.103365138 | 3.02855154   | 0.002457246 | 0.016401516 |
| UTP6      | 1609.990489 | 0.263916298  | 0.087140324 | 3.02863572   | 0.002456607 | 0.016401516 |
| ACY2      | 2490.128159 | -0.560761508 | 0.185167929 | -3.028394327 | 0.00245857  | 0.016401537 |
| GADD5B    | 5735.635698 | 0.813032123  | 0.268474699 | 3.028337961  | 0.002459029 | 0.016401537 |
| WRD830S   | 4720.997763 | 0.438611828  | 0.144856588 | 3.027903944  | 0.002462563 | 0.016419169 |
| FAM13C    | 1800.810954 | -0.766061067 | 0.253044321 | -3.027197016 | 0.002466844 | 0.016441763 |
| FER       | 1010.465303 | 0.551651154  | 0.182354609 | 3.026816011  | 0.002471443 | 0.016464643 |
| FXR       | 1222.10899  | 0.555116529  | 0.18344339  | 3.026992279  | 0.002477367 | 0.016499963 |
| CHES5     | 1245.564004 | 0.52219904   | 0.172584157 | 3.02576465   | 0.002480053 | 0.016511882 |
| SLC26A2   | 1022.670234 | 0.654379108  | 0.216300241 | 3.02537688   | 0.002483639 | 0.016529787 |
| HMG1      | 14524.74222 | -0.230791422 | 0.076305599 | -3.024567329 | 0.00248989  | 0.016565412 |
| G2E3      | 502.1899291 | -0.445310086 | 0.147277759 | -3.023607149 | 0.002497806 | 0.016606082 |
| DRMP1     | 3439.143609 | 0.430030253  | 0.142222982 | 3.023634057  | 0.002497583 | 0.016606082 |
| DHS2      | 68.74080091 | 0.850887182  | 0.281448488 | 3.023243045  | 0.002500813 | 0.016620081 |
| RAPGEF4   | 8284.100248 | -1.238292323 | 0.409627822 | -3.022969281 | 0.002503077 | 0.016629127 |
| ZC3H6     | 902.3560069 | -0.425146329 | 0.140649009 | -3.022744972 | 0.002504932 | 0.01663546  |
| AC12314.1 | 668.2177382 | 0.697596472  | 0.230812743 | 3.022348174  | 0.002508219 | 0.016645287 |
| GET4      | 3872.514164 | 0.389944109  | 0.131994074 | 3.022439547  | 0.002507462 | 0.016645287 |
| EMK1      | 1506.023738 | 0.326209652  | 0.107939935 | 3.022140516  | 0.00250994  | 0.016650715 |
| LRG1K     | 64.9627254  | -1.091992624 | 0.361523309 | -3.02051727  | 0.002523313 | 0.016727385 |
| RASSF6    | 14.83706246 | 0.88250151   | 0.292161544 | 3.020594418  | 0.00252279  | 0.016727385 |
| NPO       | 139.4860169 | 0.69638659   | 0.230570955 | 3.020270223  | 0.002525493 | 0.016       |

|           |              |              |             |              |              |             |
|-----------|--------------|--------------|-------------|--------------|--------------|-------------|
| MTA2      | 4949.73757   | 0.367406931  | 0.121680729 | 1.019434013  | 0.0025132475 | 0.01675798  |
| FMDD      | 602.0747149  | 0.7835120    | 0.259491179 | 1.019490023  | 0.002513999  | 0.01675798  |
| ITPPL2    | 1578.634943  | 0.444742128  | 0.147313799 | 1.019012013  | 0.002536005  | 0.016775316 |
| PLEKPM1   | 2934.397148  | 0.13598368   | 0.103888745 | 1.018598101  | 0.002539472  | 0.016792222 |
| ZMNT2     | 4497.89423   | 0.265632931  | 0.088012046 | 3.018142879  | 0.00254329   | 0.016811436 |
| SLC3S83   | 793.8371464  | -0.355570218 | 0.111193193 | -3.017902513 | 0.002545308  | 0.016818744 |
| SRGN1     | 11020.67602  | -0.68669551  | 0.22754428  | -3.017740336 | 0.00254667   | 0.016821715 |
| ZNF705G   | 1.806498466  | -1.606171311 | 0.532318078 | -3.01731498  | 0.002550247  | 0.016827245 |
| NFSD9     | 224.0546809  | 0.492762549  | 0.163306637 | 3.017406753  | 0.002549475  | 0.016827245 |
| APEX2     | 1220.28198   | 0.457302385  | 0.15154543  | 3.017411527  | 0.002549434  | 0.016827245 |
| ATP5MF    | 6999.173028  | 0.43914098   | 0.145881511 | 3.016461213  | 0.002557439  | 0.016868665 |
| NKN1      | 3131.304032  | -0.556380579 | 0.184476038 | -3.016004564 | 0.002561294  | 0.016883159 |
| KNAO355   | 1710.125098  | -0.357293348 | 0.118469732 | -3.015904077 | 0.002562143  | 0.016883159 |
| ADPOR2    | 8963.726831  | -0.49262629  | 0.163344379 | -3.015875415 | 0.002562385  | 0.016883159 |
| SLC35A2   | 1107.024467  | 0.314443854  | 0.104270243 | 1.015657154  | 0.00256423   | 0.016883243 |
| POPS      | 1219.754252  | 0.346970443  | 0.11505598  | 1.015666039  | 0.002564448  | 0.016883243 |
| ITB       | 5668.604097  | 0.362844819  | 0.12034355  | 1.015245469  | 0.002567036  | 0.016889651 |
| HDMEZ     | 757.1723469  | 0.326977675  | 0.108435141 | 1.015421681  | 0.002566227  | 0.016889651 |
| KLHCL1    | 297.3624128  | -0.647781253 | 0.214862055 | -3.014870421 | 0.002570891  | 0.016908974 |
| DNMT3A    | 2041.186338  | -0.303477839 | 0.100678112 | -3.014337817 | 0.002575409  | 0.016932646 |
| RPL29     | 21574.78833  | 0.469260482  | 0.155688123 | 3.01410586   | 0.002577379  | 0.016933515 |
| SPATA20   | 4762.899396  | 0.370963879  | 0.123075357 | 3.014119865  | 0.00257726   | 0.016933515 |
| ZRANB2    | 3138.018608  | -0.321850688 | 0.106795761 | -3.013702827 | 0.002580805  | 0.016949982 |
| FCN3      | 31.75065345  | 1.211217708  | 0.401956048 | 3.013309409  | 0.002584156  | 0.016965947 |
| DPF3      | 651.1824378  | -0.53307391  | 0.176959118 | -3.012412789 | 0.002591799  | 0.017010065 |
| RNF145    | 3274.966126  | 0.335623204  | 0.111466555 | 3.010976749  | 0.002604088  | 0.017064634 |
| STARB8    | 3617.879377  | 0.295024021  | 0.09799409  | 3.010630749  | 0.002607057  | 0.017098025 |
| HA2K9     | 494.0019104  | 0.467829271  | 0.155473738 | 1.009056554  | 0.002620603  | 0.017174644 |
| SERTAD3   | 880.6414705  | 0.490358472  | 0.162063638 | 1.009056511  | 0.002620515  | 0.017174644 |
| ZNF320    | 213.2710289  | -0.744412352 | 0.24744208  | -3.008423416 | 0.00262607   | 0.017204353 |
| USP29     | 55812.7609   | 1.515244875  | 0.503693638 | 1.008266853  | 0.002627423  | 0.017207101 |
| COBL      | 8407.21324   | -0.72472119  | 0.240968883 | -3.00751019  | 0.0026338    | 0.01723661  |
| NOL9      | 1169.0101    | 0.300202305  | 0.099816249 | 3.007549463  | 0.002633633  | 0.01723661  |
| SERPIN B4 | 1.844187833  | 0.059495963  | 1.017457457 | 3.007001366  | 0.002638386  | 0.017260494 |
| LRCB      | 1822.078688  | -0.332739874 | 0.110663635 | -3.006767971 | 0.002640412  | 0.017267621 |
| TMEM63A   | 10729.12179  | -0.751704898 | 0.250017987 | -3.006603279 | 0.002641843  | 0.017270849 |
| ZCRB1     | 3085.860012  | -0.359737253 | 0.119654895 | -3.006456636 | 0.002643117  | 0.017273054 |
| AMELX     | 0.987150437  | 2.409665374  | 0.801574752 | 3.006164263  | 0.00264566   | 0.017277418 |
| PCB01     | 1721.113943  | 0.357796066  | 0.119018488 | 3.006222578  | 0.002645153  | 0.017277418 |
| HEZ       | 1355.260827  | -0.301838593 | 0.100420281 | -3.00575332  | 0.002649238  | 0.017294655 |
| ANG AB    | 1744.863462  | 0.182333364  | 0.060673356 | 3.005493297  | 0.002651504  | 0.01730323  |
| ZNF784    | 512.3295087  | 0.562985616  | 0.187371996 | 1.004642779  | 0.002658929  | 0.01734563  |
| ALYRF     | 1977.932786  | 0.50367909   | 0.167641898 | 1.004494105  | 0.002660279  | 0.01734797  |
| PTCD3     | 3033.437364  | -0.23411607  | 0.078010116 | -3.00380541  | 0.002666011  | 0.017392499 |
| MYO6B     | 58.25683408  | 0.73056895   | 0.243238269 | 1.003498991  | 0.002668944  | 0.017392499 |
| FOXO4     | 2786.607833  | -0.653368814 | 0.177516184 | -3.003280883 | 0.002670858  | 0.017398813 |
| RAGRF1    | 2247.200457  | -0.669886703 | 0.223133745 | -3.002189128 | 0.002680456  | 0.017455167 |
| ZNF224    | 1210.261814  | -0.324184394 | 0.107994978 | -3.001858046 | 0.002683373  | 0.017467989 |
| VPS33B    | 968.3520249  | 0.260744752  | 0.086877991 | 3.001275102  | 0.002688516  | 0.017495287 |
| ARF1      | 16076.4418   | 0.287001049  | 0.095630017 | 3.001160705  | 0.002689526  | 0.017495683 |
| BNIP1     | 29.6680142   | -0.510649876 | 0.170158591 | -3.001023178 | 0.002690741  | 0.017497411 |
| NMPRE2    | 8315.639674  | -0.438982842 | 0.146306637 | -3.000430134 | 0.002695986  | 0.017519156 |
| ROML1     | 4508.182306  | 0.648061568  | 0.215888185 | 3.000449167  | 0.002695817  | 0.017519156 |
| CFAP44    | 652.2418286  | -0.595902022 | 0.198647923 | -2.999789848 | 0.002701659  | 0.017544099 |
| ALAD      | 9912.075443  | -0.446971099 | 0.14900119  | -2.999782063 | 0.002701728  | 0.017544099 |
| DOT       | 6.073522577  | 1.529941862  | 0.510058403 | 2.999542507  | 0.002703854  | 0.017551717 |
| FRS321    | 31.0486303   | 1.088415406  | 0.362023729 | 2.998945475  | 0.002709158  | 0.017579954 |
| PIKG2     | 1881.062008  | 0.360177379  | 0.120150117 | 2.997728173  | 0.002720002  | 0.017644108 |
| ZNF580    | 2968.03781   | 0.488271761  | 0.162499746 | 2.996157515  | 0.002734052  | 0.017725007 |
| RNF13     | 7222.916188  | -0.530099161 | 0.196887838 | -2.995616716 | 0.002738905  | 0.017754229 |
| DNAAF10   | 145.0840433  | -0.558164988 | 0.186392095 | -2.994574351 | 0.002748281  | 0.017808743 |
| NDFU1A11  | 8364.504238  | 0.541811052  | 0.180985142 | 2.993676975  | 0.002756376  | 0.017854922 |
| MS4ME     | 151.40044121 | -0.719624618 | 0.240412758 | -2.993287973 | 0.002759892  | 0.017859804 |
| DRAP1     | 7310.61083   | 0.536897438  | 0.179368079 | 2.993271939  | 0.002760037  | 0.017859804 |
| CYP11B1   | 769.2724827  | 0.843572888  | 0.281812656 | 2.993181844  | 0.002759043  | 0.017859804 |
| CASP1     | 1488.269879  | 0.825708105  | 0.275876712 | 2.993033008  | 0.002762199  | 0.017867519 |
| TMOD1     | 1198.00883   | -0.357506515 | 0.119480944 | -2.992163454 | 0.002770079  | 0.017912206 |
| MEXB      | 197.8985245  | 0.800161479  | 0.267477153 | 2.991513364  | 0.002775984  | 0.017944092 |
| DKS2      | 1064.57296   | 0.25680797   | 0.085854632 | 2.991195259  | 0.002778877  | 0.017954986 |
| HS3T5     | 357.883792   | -0.619885874 | 0.20724491  | -2.991078884 | 0.002779937  | 0.017957046 |
| NWASB1    | 18.7245732   | -0.970832481 | 0.324597075 | -2.990945489 | 0.002781142  | 0.017958539 |
| BB9       | 685.0925902  | -0.569620157 | 0.19047183  | -2.990574289 | 0.002784534  | 0.017974142 |
| POLR1E    | 853.5487991  | 0.405164625  | 0.135508503 | 2.989957211  | 0.002790165  | 0.018004186 |
| KNAOS56   | 1536.599292  | -0.401399475 | 0.13426931  | -2.989510213 | 0.002794251  | 0.018024424 |
| STX3      | 1389.222017  | 0.393509959  | 0.131646677 | 2.989132513  | 0.002797708  | 0.018027607 |
| TOMMMOL   | 1249.550092  | 0.292407188  | 0.097823266 | 2.989137442  | 0.002797663  | 0.018027607 |
| CLN6      | 2026.969957  | 0.430934287  | 0.144156984 | 2.989340334  | 0.002795805  | 0.018027607 |
| RFXANK    | 2552.178979  | 0.594226033  | 0.198828398 | 2.988637649  | 0.002802242  | 0.018050516 |
| TBL2      | 1301.641016  | 0.30952361   | 0.103620444 | 2.987075769  | 0.002816599  | 0.018130319 |
| LPCAT1    | 4288.18745   | 0.480075584  | 0.160714007 | 2.987141444  | 0.002815988  | 0.018130319 |
| ACAD9     | 2048.480898  | 0.224620293  | 0.075203501 | 2.986832945  | 0.002818837  | 0.018138339 |
| LPCAT2    | 1121.437384  | -0.646321475 | 0.216447711 | -2.986039776 | 0.002821659  | 0.018175995 |
| RPS4X     | 27526.30767  | 0.406389587  | 0.136103812 | 2.985879545  | 0.00282764   | 0.018175995 |
| BLK       | 11.58510309  | 1.239190983  | 0.415013902 | 2.985902348  | 0.002827429  | 0.018175995 |
| ASCC3     | 1398.3652    | 0.343471809  | 0.115057889 | 2.985203884  | 0.002833848  | 0.018209547 |
| RNAGE1    | 38577.71394  | 0.226559918  | 0.277659476 | 2.984432352  | 0.00284105   | 0.018249464 |
| ZNF599    | 842.9175895  | -0.306654821 | 0.102756222 | -2.984294514 | 0.00284233   | 0.018251327 |
| EML3      | 4952.845083  | 0.42142033   | 0.148177792 | 2.983861677  | 0.002846354  | 0.018270798 |
| PARD8B    | 628.7546224  | -0.877710351 | 0.294259162 | -2.982780029 | 0.002856432  | 0.018329104 |
| EIF252    | 5454.723699  | 0.290575683  | 0.097425938 | 2.982528997  | 0.002858776  | 0.018333137 |
| UQR11     | 9531.697801  | 0.566707555  | 0.190008182 | 2.982542305  | 0.002858646  | 0.018333137 |
| CMT6B     | 2347.964277  | 0.555766249  | 0.186349216 | 2.982391131  | 0.002860063  | 0.018333256 |
| PIK3C3    | 2163.807419  | -0.31367733  | 0.105213883 | -2.981330221 | 0.002869991  | 0.018388207 |
| G5BP1.9   | 2583.234474  | -0.328088985 | 0.110050373 | -2.981261906 | 0.002870632  | 0.018388207 |
| KIF3      | 3361.818179  | 0.32039556   | 0.107483175 | 2.980890345  | 0.002874117  | 0.018404135 |
| COPS6     | 5896.078139  | 0.364461018  | 0.122276126 | 2.980639217  | 0.002876475  | 0.018412834 |
| BKAS3     | 1362.076219  | -0.549273201 | 0.184297038 | -2.980369148 | 0.002879012  | 0.018422678 |
| NAB2      | 3850.406058  | 0.438212131  | 0.147046216 | 2.980097986  | 0.002881562  | 0.018432599 |
| EIF3D     | 5400.033821  | 0.323453093  | 0.111563759 | 2.979964699  | 0.002882818  | 0.018434218 |
| GMPX2     | 612.6102297  | -0.576700791 | 0.1935579   | -2.979782199 | 0.002884534  | 0.018438808 |
| ADME      | 108.4824063  | 0.833106993  | 0.279613125 | 2.979498879  | 0.002887203  | 0.018449467 |
| POLR3G    | 292.8866083  | -0.41480254  | 0.139235316 | -2.97914962  | 0.002890496  | 0.018464108 |
| RAP8EF6   | 1168.971602  | -0.578588213 | 0.194230005 | -2.978881728 | 0.002893024  | 0.018467455 |
| SUPT16H   | 3998.22868   | 0.26700864   | 0.0896331   | 2.978906695  | 0.002892789  | 0.018467455 |
| IFI2L2    | 4903.135971  | 0.652437202  | 0.219086774 | 2.977985337  | 0.002901499  | 0.018515138 |
| IFT1      | 3800.921088  | -0.62403683  | 0.209388001 | -2.977265556 | 0.00290832   | 0.01853438  |
| TULP4     | 3312.381931  | -0.553314669 | 0.185874438 | -2.976909984 | 0.002911695  | 0.01853438  |
| CB3D      | 2180.200512  | 0.544798096  | 0.183013516 | 2.976818914  | 0.00291256   | 0.01853438  |
| HK1       | 6725.946913  | 0.448035722  | 0.150498218 | 2.977016784  | 0.002910681  | 0.01853438  |
| BALBP1    | 4735.606885  | 0.153695147  | 0.051626524 | 2.977057801  | 0.002910291  | 0.01853438  |
| CHRC1     | 533.7300381  | 1.079980207  | 0.362744063 | 2.977217652  | 0.002908774  | 0.01853438  |
| RPL4      | 40770.12469  | 0.290085499  | 0.097429418 | 2.977391237  | 0.002907128  | 0.01853438  |
| IFI7      | 23.44431424  | 0.756116777  | 0.23394007  | 2.977330599  | 0.002905804  | 0.01853438  |
| TNBM1     | 10910.51119  | 0.487604517  | 0.16385398  | 2.975847072  | 0.002921798  |             |



|             |              |              |             |              |             |             |
|-------------|--------------|--------------|-------------|--------------|-------------|-------------|
| ATF4        | 15758.43665  | 0.347863263  | 0.116961541 | 2.974167928  | 0.002937842 | 0.018674619 |
| SYTL4       | 728.9957992  | 0.643754207  | 0.216486772 | 2.973642468  | 0.002942877 | 0.018695032 |
| AFG3L2      | 2820.156726  | 0.202856905  | 0.068130205 | 2.97300519   | 0.002944194 | 0.018696953 |
| OTX2        | 1.425652434  | -2.356695475 | 0.792894294 | -2.97226844  | 0.002956071 | 0.018765911 |
| SNRPD1      | 2025.266466  | 0.346664648  | 0.116637725 | 2.972148571  | 0.002957235 | 0.018766836 |
| INKMP3      | 1486.558967  | -0.76952163  | 0.258969844 | -2.971589857 | 0.002962622 | 0.018782377 |
| GNAA1       | 3619.270584  | -0.52434517  | 0.185906151 | -2.971577404 | 0.002962742 | 0.018782377 |
| REX1B       | 4260.557804  | 0.54954696   | 0.184932144 | 2.971614071  | 0.002962388 | 0.018782377 |
| C6orf89     | 6457.386223  | 0.158956131  | 0.053499648 | 2.971162195  | 0.002966751 | 0.018801322 |
| LILRA4      | 760.7566231  | 1.18005653   | 0.399302319 | 2.97094758   | 0.00297611  | 0.018854153 |
| CD40LG      | 9.060806542  | -1.10370618  | 0.371627905 | -2.969922782 | 0.002978746 | 0.018864369 |
| SPATA12     | 38.46322376  | 0.909900915  | 0.306384707 | 2.96979873   | 0.002979949 | 0.018865505 |
| MPE1B       | 3.51111879   | -1.125972028 | 0.37922762  | -2.969119253 | 0.002986547 | 0.018898762 |
| PFYI        | 1077.04008   | 0.357093104  | 0.120272046 | 2.969046546  | 0.002987253 | 0.018898762 |
| HP1B        | 10995.38065  | -0.517706513 | 0.174381328 | -2.968784893 | 0.002989798 | 0.018901968 |
| NMP14       | 6881.95112   | 0.775642414  | 0.261266075 | 2.968783505  | 0.002989812 | 0.018901968 |
| UQLCR10     | 5595.682243  | 0.434071515  | 0.146229195 | 2.968442639  | 0.002993227 | 0.018917072 |
| ARL6IP4     | 9194.59843   | 0.509523718  | 0.171693336 | 2.967637873  | 0.003000777 | 0.018959547 |
| CNP         | 82461.60252  | -0.752101557 | 0.253474605 | -2.967167259 | 0.003005574 | 0.018960427 |
| TMEM17      | 483.976317   | 0.325208561  | 0.109604961 | 2.967097085  | 0.00300626  | 0.018960427 |
| MRPL18      | 2273.835529  | 0.245455038  | 0.082720313 | 2.96728854   | 0.003004389 | 0.018960427 |
| SERPIN8     | 1088.346047  | 0.597437306  | 0.201333344 | 2.96740361   | 0.003003264 | 0.018960427 |
| SCX         | 230.2780004  | 0.666251328  | 0.224516007 | 2.967500033  | 0.00300232  | 0.018960427 |
| SLC25A37    | 3015.480234  | 0.466135669  | 0.157107571 | 2.966984115  | 0.003007365 | 0.018960906 |
| RNF216      | 2641.221395  | -0.256771288 | 0.086626559 | -2.966298585 | 0.003014077 | 0.018996276 |
| RNASEH2C    | 2833.905978  | 0.453513721  | 0.152895933 | 2.966159482  | 0.003015441 | 0.018998823 |
| SLTM        | 3780.884722  | -0.283860725 | 0.095710995 | -2.965811044 | 0.003018859 | 0.019004112 |
| VON         | 5416.47010   | -0.625922359 | 0.211046748 | -2.965799569 | 0.003018971 | 0.019004112 |
| ZNF321      | 643.0437137  | -0.439181312 | 0.148083973 | -2.965758511 | 0.003019374 | 0.019004112 |
| ZBTB9       | 542.7522853  | 0.325348175  | 0.10972709  | 2.965067053  | 0.00302617  | 0.019033884 |
| ARL4C       | 3783.12597   | 0.615359775  | 0.207834491 | 2.965100713  | 0.003025839 | 0.019033884 |
| CENPF       | 280.6029783  | -0.478466972 | 0.161374788 | -2.964942562 | 0.003027394 | 0.019035091 |
| FGF16       | 3.38426825   | 1.985502868  | 0.669746513 | 2.964558725  | 0.003031174 | 0.019052354 |
| XBP1        | 2908.178818  | 0.495938353  | 0.167302712 | 2.964317471  | 0.003033551 | 0.019060798 |
| MAN1C1      | 4611.149982  | -0.646166103 | 0.218010594 | -2.963920656 | 0.003037466 | 0.019072388 |
| POPC2       | 185.6469121  | 0.619068738  | 0.208861002 | 2.964022623  | 0.00303646  | 0.019072388 |
| SMO4        | 483.442296   | 0.635830007  | 0.214556867 | 2.963456806  | 0.003042048 | 0.01909465  |
| TOHM6       | 4234.203833  | 0.387856202  | 0.130943565 | 2.9620104    | 0.003056375 | 0.019178048 |
| CACFD1      | 1661.244466  | 0.425406938  | 0.143631565 | 2.961792823  | 0.003058535 | 0.019185073 |
| PLXNB2      | 10101.28372  | 0.419544125  | 0.1416588   | 2.961652393  | 0.003059993 | 0.019187293 |
| NUDT6       | 379.1430765  | -0.257745121 | 0.087040959 | -2.961193483 | 0.003064494 | 0.019209371 |
| ATP5F1E     | 16670.63911  | 0.545933009  | 0.184176725 | 2.960964880  | 0.003066769 | 0.019210567 |
| ANXKD7      | 752.0196161  | 0.524984875  | 0.177301268 | 2.960976483  | 0.003066654 | 0.019210567 |
| MPS21       | 4011.157252  | 0.362510265  | 0.122445403 | 2.960590395  | 0.0030705   | 0.019227402 |
| MAGEC3      | 515649.1683  | -1.222226959 | 0.379152638 | -2.959827999 | 0.003078108 | 0.019268499 |
| RIGC2       | 5747.754737  | -0.56096442  | 0.189539251 | -2.959621381 | 0.003080173 | 0.019274878 |
| AGO1        | 167.8899242  | 0.874963513  | 0.295653243 | 2.959424716  | 0.003082124 | 0.019280637 |
| GJC3        | 32.42809584  | 1.030480858  | 0.348260161 | 2.958933982  | 0.003086994 | 0.019304448 |
| DNPH1       | 1678.265324  | 0.42250991   | 0.142812836 | 2.958486947  | 0.003091533 | 0.019326278 |
| PPP1R7      | 3558.941563  | 0.390437938  | 0.131881835 | 2.958274742  | 0.003093663 | 0.019333031 |
| LARP7       | 1947.958935  | -0.195525735 | 0.066103208 | -2.957885735 | 0.003097569 | 0.019345039 |
| FYB1        | 1614.396382  | -0.748079157 | 0.252910666 | -2.957874362 | 0.003097684 | 0.019345039 |
| PANP2B      | 9710.61987   | -1.042429679 | 0.352451565 | -2.957653711 | 0.003099902 | 0.019352332 |
| ADAM12      | 574.6995972  | -0.879403109 | 0.297365661 | -2.957316779 | 0.003103291 | 0.019357657 |
| C21orf91    | 1560.008591  | -0.734893474 | 0.248503088 | -2.957281119 | 0.00310365  | 0.019357657 |
| RFTN1       | 2067.001882  | -0.485538729 | 0.164189002 | -2.957193173 | 0.00310453  | 0.019357657 |
| E100A5      | 4.059464903  | 1.685558425  | 0.56909391  | 2.957151427  | 0.003104958 | 0.019357657 |
| MCF2L       | 5334.908549  | -0.592683011 | 0.200466808 | -2.956514433 | 0.003111377 | 0.019388793 |
| SOD5        | 7231.41364   | 0.668360203  | 0.226088704 | 2.956447277  | 0.003112054 | 0.019388793 |
| TCLF5       | 2012.97121   | -0.603997777 | 0.204312723 | -2.956241625 | 0.003114113 | 0.019395166 |
| RPL10L      | 1.995005317  | -3.26300717  | 1.104063118 | -2.955453466 | 0.003122098 | 0.019438224 |
| SERPINA11   | 0.529649168  | -2.324792066 | 0.787297154 | -2.952877519 | 0.003148269 | 0.019594542 |
| TP1         | 7638.473571  | -0.491966776 | 0.166632213 | -2.952410884 | 0.00315303  | 0.019617515 |
| POLR3K      | 588.1318431  | 0.316150251  | 0.107097179 | 2.951994194  | 0.003157289 | 0.019637419 |
| PRPF38B     | 2372.62838   | -0.306346131 | 0.103790306 | -2.951587113 | 0.003161453 | 0.019656688 |
| ABCAN       | 375.2875706  | -0.797103588 | 0.270125442 | -2.950864537 | 0.003168859 | 0.019696086 |
| COA5        | 2009.161384  | -0.284578462 | 0.096445553 | -2.950655236 | 0.003171007 | 0.019702791 |
| BP1         | 1321.308782  | 0.251713272  | 0.085315859 | 2.950369083  | 0.003173945 | 0.019714404 |
| TWINK       | 419.8388874  | 0.4597228    | 0.155842792 | 2.949941666  | 0.003178622 | 0.019736802 |
| VCLL4       | 3406.125724  | 0.260790445  | 0.088742525 | 2.949715665  | 0.003180655 | 0.019742771 |
| GPATCH8     | 1013.032765  | 0.392189412  | 0.132999016 | 2.949563513  | 0.003182221 | 0.019745907 |
| BBP         | 1134.845692  | -0.58241802  | 0.19846579  | -2.949086563 | 0.003187147 | 0.019763099 |
| OTUD1       | 738.4417792  | 0.392060629  | 0.132941903 | 2.949112361  | 0.003186881 | 0.019763099 |
| NAGLU       | 3217.883448  | 0.506327668  | 0.171711664 | 2.948708638  | 0.003191047 | 0.019780625 |
| DPYD        | 1040.654264  | -0.708410212 | 0.240263444 | -2.948486224 | 0.003193344 | 0.019788208 |
| SDCI        | 1809.752004  | 1.328990425  | 0.450869909 | 2.947613943  | 0.003202367 | 0.019837453 |
| MRC1        | 942.1734803  | 0.967470253  | 0.328315301 | 2.946771747  | 0.003211101 | 0.019884872 |
| CEP350L1    | 3621.6311001 | -0.289646654 | 0.0883002   | -2.946552043 | 0.003213383 | 0.019892322 |
| TTRAP       | 2500.162242  | -0.462013909 | 0.156858127 | -2.945425375 | 0.003225109 | 0.019958207 |
| THO5        | 1118.994678  | 0.351281988  | 0.119270777 | 2.945247728  | 0.003226962 | 0.019962967 |
| PTG52       | 286.2560754  | 1.071766784  | 0.363923062 | 2.94503673   | 0.003229163 | 0.019969882 |
| ZNF605      | 855.9900099  | -0.427347717 | 0.145121762 | -2.944752805 | 0.003232128 | 0.019981511 |
| NPHP3-AC0D1 | 282.4327645  | -1.150153409 | 0.390790323 | -2.943147105 | 0.00324894  | 0.020073952 |
| AC05374.3   | 8.018031781  | -1.219980613 | 0.414519962 | -2.943116679 | 0.003249259 | 0.020073952 |
| MED15       | 4564.406236  | 0.363151861  | 0.090174937 | 2.942634275  | 0.003254326 | 0.020098518 |
| UMF2        | 4868.351814  | 0.384324014  | 0.130613371 | 2.94245536   | 0.003256207 | 0.020103398 |
| CDCC14      | 2008.845124  | -0.514307994 | 0.17480555  | -2.942171988 | 0.003259189 | 0.020115066 |
| SRFS5       | 1235.29175   | -0.23615754  | 0.080293161 | -2.941191216 | 0.003269526 | 0.020117111 |
| PMW1        | 2079.289526  | 0.329595137  | 0.112090429 | 2.940439592  | 0.003274669 | 0.020200828 |
| TMEM69      | 303.0124004  | 0.337861683  | 0.114901059 | 2.940457525  | 0.003272729 | 0.020200828 |
| POLR3C      | 1090.585023  | 0.245626173  | 0.083333118 | 2.940464556  | 0.003272705 | 0.020200828 |
| ASAH2B      | 275.3470791  | 0.506350949  | 0.172232301 | 2.939933023  | 0.003282862 | 0.020227301 |
| STAR8B      | 753.0682434  | -0.485029958 | 0.165007068 | -2.939449585 | 0.003287958 | 0.020245162 |
| CCR3        | 9.325171614  | 1.488615566  | 0.506425348 | 2.939457063  | 0.003287878 | 0.020245162 |
| ARG1        | 13.6812788   | 1.554821748  | 0.529229176 | 2.937889776  | 0.003304449 | 0.02033991  |
| CLTN        | 50.28602422  | 0.845499015  | 0.287806779 | 2.937592423  | 0.003307716 | 0.020353219 |
| MRPL47      | 1550.819034  | 0.30926035   | 0.10529851  | 2.936869938  | 0.003314181 | 0.020386193 |
| CHPF2       | 2692.474559  | 0.420327498  | 0.143131639 | 2.936649707  | 0.003317786 | 0.020401564 |
| EPTBN1      | 31653.16461  | -0.991699990 | 0.167443541 | -2.936475504 | 0.003319646 | 0.020405564 |
| AC116366.3  | 1463.980282  | -0.361002959 | 0.122944416 | -2.936381803 | 0.003320651 | 0.020405564 |
| PM          | 2940.324521  | 0.409457965  | 0.139461086 | 2.936001541  | 0.003324727 | 0.020427396 |
| CCDC65      | 94.96609082  | -0.735798394 | 0.250629047 | -2.935806531 | 0.003326817 | 0.020429829 |
| MPP1        | 3005.534361  | 0.445133132  | 0.151640905 | 2.935442332  | 0.003330725 | 0.020447013 |
| DLEC1       | 318.5219884  | -0.803492828 | 0.273779502 | -2.934817334 | 0.003337441 | 0.020481418 |
| STAG1       | 1265.634837  | -0.42567643  | 0.145057949 | -2.934526746 | 0.003340568 | 0.020491782 |
| PTPDC1      | 1061.971153  | -0.524610916 | 0.178793599 | -2.934170574 | 0.003344404 | 0.020503638 |
| RSPH10B     | 34.74954709  | -0.71809319  | 0.244743221 | -2.934067739 | 0.003345512 | 0.020503638 |
| CFB         | 1537.445543  | 0.922350523  | 0.314355413 | 2.934100977  | 0.003345154 | 0.020503638 |
| BHR54       | 1105.597223  | 0.439531973  | 0.149850899 | 2.933128701  | 0.003355648 | 0.020558919 |
| PHD1        | 2826.193345  | 0.393105068  | 0.134094357 | 2.932867932  | 0.003358467 | 0.020569356 |
| ATF7        | 2380.25311   | -0.327373706 | 0.111630552 | -2.932653298 | 0.00336079  | 0.020569908 |
| AL162331.1  | 585.031998   | 0.577374317  | 0.19687833  | 2.932675405  | 0.003360955 | 0.020569908 |
| ZNF158      | 2720.508289  | 0.314397802  | 0.107214298 | 2.932421196  | 0.00336327  | 0.020578256 |
| COX12       | 1159.61939   | -0.47109561  | 0.1666      |              |             |             |

|            |             |              |             |              |             |             |
|------------|-------------|--------------|-------------|--------------|-------------|-------------|
| CWZC7      | 935.7151621 | -0.37443900  | 0.12773393  | -2.93137689  | 0.00374666  | 0.020616408 |
| CDL3       | 293.130272  | -0.27091600  | 0.09242078  | -2.93133379  | 0.00375099  | 0.020616408 |
| ZCH7B      | 7238.355107 | -0.30017448  | 0.10244088  | -2.93021134  | 0.003387209 | 0.020676671 |
| ALDOA      | 54794.48509 | 0.45157983   | 0.15410826  | 2.93027656   | 0.003386604 | 0.020676671 |
| APB2       | 3482.87884  | -0.51858854  | 0.17702887  | -2.92940058  | 0.003396161 | 0.020724456 |
| CCN E2     | 700.3601696 | -0.81077262  | 0.27893420  | -2.92926648  | 0.003397628 | 0.020726544 |
| G.RID1     | 1581.639462 | -0.65065938  | 0.22219959  | -2.92824956  | 0.00340876  | 0.020784984 |
| ZNFS65     | 253.208683  | -0.38129553  | 0.12230425  | -2.92818578  | 0.003409664 | 0.020784984 |
| NCAPD3     | 786.7974072 | -0.36137689  | 0.123428074 | -2.927833674 | 0.003413324 | 0.020798853 |
| ERBN       | 8865.630598 | -0.553518239 | 0.189057794 | -2.92777205  | 0.003413996 | 0.020798853 |
| TLN.RD1    | 1387.009258 | 0.46783479   | 0.159804214 | 2.927549776  | 0.003416444 | 0.020806887 |
| COQ3       | 301.0140886 | 0.397986681  | 0.13597091  | 2.92699872   | 0.003422503 | 0.020836903 |
| TU74       | 1637.863293 | -0.51052982  | 0.174462314 | -2.926432034 | 0.003428744 | 0.020868007 |
| MV06       | 4731.603344 | -0.47497533  | 0.162359133 | -2.925461109 | 0.003433462 | 0.020900053 |
| ATG.4C     | 1452.226901 | -0.50046110  | 0.171073861 | -2.92543299  | 0.003439773 | 0.020908053 |
| CC37L1     | 967.314954  | 0.252440111  | 0.086287578 | 2.925219715  | 0.003442131 | 0.020908053 |
| DKS6       | 3205.676093 | 0.31944294   | 0.109193371 | 2.925344383  | 0.003441084 | 0.020908053 |
| ZNFA8      | 849.5741003 | 0.376274988  | 0.128622426 | 2.92542287   | 0.003439884 | 0.020908053 |
| MCTS1      | 1150.962054 | 0.327038122  | 0.111780537 | 2.925716139  | 0.003436644 | 0.020908053 |
| SPATC1     | 37.11319148 | 1.270003295  | 0.434174661 | 2.925097685  | 0.003443481 | 0.020909362 |
| SMDX       | 6500.718713 | 0.469560549  | 0.16054394  | 2.924810168  | 0.003446664 | 0.020921796 |
| FKPL       | 381.969783  | 0.474741521  | 0.162424951 | 2.922836165  | 0.00346859  | 0.021047955 |
| SPOC3      | 5849.340907 | -0.982378867 | 0.336345952 | -2.920739378 | 0.003492018 | 0.021169211 |
| CG.85      | 2.822452933 | 3.139226192  | 1.07498466  | 2.920757976  | 0.00349181  | 0.021169211 |
| ZM/M.D19   | 956.8770593 | 0.367201043  | 0.125720725 | 2.920767784  | 0.0034917   | 0.021169211 |
| PLB1       | 533.365418  | -0.579047165 | 0.198289518 | -2.920210661 | 0.003497948 | 0.02119122  |
| STUB1      | 7210.053013 | 0.493919262  | 0.150437901 | 2.920269836  | 0.003497284 | 0.02119122  |
| SHBQ       | 46.6904478  | 0.631421941  | 0.216277951 | 2.919482898  | 0.003506014 | 0.021233102 |
| RELA       | 3556.23201  | 0.349707153  | 0.119793687 | 2.919245268  | 0.0035088   | 0.021242999 |
| ERRC1      | 4981.398442 | 0.339281983  | 0.116238397 | 2.918846023  | 0.003513297 | 0.021262326 |
| NWPL38     | 8533.160724 | 0.417253878  | 0.142884488 | 2.918179224  | 0.003520856 | 0.021301991 |
| HN72       | 1896.491828 | 0.515546458  | 0.176719236 | 2.917319419  | 0.00353054  | 0.021353566 |
| ATP11A     | 3245.853534 | -0.555508552 | 0.190467527 | -2.916555614 | 0.003539196 | 0.0213989   |
| CP5F6      | 2730.46571  | -0.437831228 | 0.150133223 | -2.916284742 | 0.003542271 | 0.021410464 |
| MT3        | 31406.93363 | 0.92070594   | 0.315728685 | 2.916313054  | 0.003544026 | 0.021414052 |
| HST1H2BK   | 347.902297  | 0.790392652  | 0.271055881 | 2.915976766  | 0.003545769 | 0.021417561 |
| ZNFS36     | 644.6532403 | -0.565343642 | 0.193918073 | -2.915373663 | 0.003552629 | 0.021451967 |
| NI01       | 1144.25883  | -0.735595897 | 0.25235427  | -2.914933433 | 0.003557644 | 0.021475213 |
| TPM6       | 11288.09945 | 0.222932499  | 0.076483858 | 2.91476537   | 0.003559556 | 0.021479744 |
| JDSD1      | 2863.853294 | 0.227736506  | 0.078135048 | 2.91454524   | 0.003560849 | 0.021480487 |
| UV55A      | 2793.163522 | -0.48713107  | 0.167151622 | -2.914306571 | 0.003564798 | 0.021497263 |
| BA87B      | 515.6267709 | 0.677559228  | 0.237506343 | 2.914153742  | 0.003566542 | 0.021500754 |
| VPS26A     | 2738.567909 | 0.716212079  | 0.094794319 | 2.913896114  | 0.003569487 | 0.021504436 |
| ZNF598     | 2114.628569 | 0.358964241  | 0.123189796 | 2.913914576  | 0.003569276 | 0.021504436 |
| PHKPL      | 1973.668564 | -0.296697082 | 0.101870544 | -2.91249138  | 0.003580581 | 0.021587282 |
| FTTW2      | 819.3204913 | 0.266436033  | 0.091478403 | 2.912556662  | 0.003584837 | 0.021587282 |
| XPD4       | 1000.407932 | -0.363012405 | 0.124642556 | -2.912387748 | 0.003586771 | 0.021587394 |
| RAD4L2     | 1695.191927 | -0.304445339 | 0.104538703 | -2.912256695 | 0.003588276 | 0.021589403 |
| POGK       | 4513.677953 | -0.286873603 | 0.098512109 | -2.912064383 | 0.003590486 | 0.02159565  |
| NREG       | 408.1097377 | 0.574491857  | 0.197288138 | 2.911943215  | 0.003591879 | 0.021596698 |
| LSM4       | 4028.503504 | 0.346825813  | 0.119121242 | 2.911536233  | 0.003596562 | 0.021618082 |
| FREM1      | 312.7888719 | -0.103621146 | 0.355978662 | -2.910878304 | 0.003604444 | 0.021642477 |
| NXF1       | 5054.512268 | 0.319660087  | 0.109813316 | 2.910941019  | 0.00360342  | 0.021642477 |
| TMEM67B    | 2507.472847 | 0.167803037  | 0.057644975 | 2.910974211  | 0.003603038 | 0.021642477 |
| RHOBT1     | 935.4769763 | -0.323385897 | 0.111106137 | -2.910603371 | 0.003607316 | 0.021654472 |
| AD90360.1  | 166.2909407 | -0.513015621 | 0.176286118 | -2.910130577 | 0.003617278 | 0.021680197 |
| AMTB       | 2719.842466 | 0.346858577  | 0.119255662 | 2.908530044  | 0.003631323 | 0.021784393 |
| GWMP3      | 3936.421041 | 0.205904578  | 0.070802453 | 2.90815593   | 0.003635667 | 0.021803372 |
| DFD1       | 1445.244473 | -0.33422858  | 0.114590805 | -2.907986886 | 0.003637636 | 0.021800865 |
| PDE1C      | 2965.442708 | -0.847859665 | 0.291595888 | -2.907653044 | 0.003641521 | 0.021817163 |
| PSTP2P2    | 349.9289114 | 0.876122232  | 0.301307669 | 2.907732929  | 0.003640591 | 0.021817163 |
| UBE25      | 3572.654022 | 0.611485731  | 0.210317796 | 2.907506068  | 0.003643233 | 0.021820324 |
| YTHC2      | 1394.529038 | -0.403600648 | 0.138868319 | -2.90635511  | 0.003656662 | 0.02188653  |
| ATIC       | 2975.614757 | 0.274212524  | 0.094347722 | 2.906403219  | 0.0036651   | 0.02188653  |
| EIF4E8P1   | 1535.729281 | 0.775958278  | 0.267015232 | 2.906044996  | 0.003660288 | 0.02190121  |
| KMT2C      | 4125.104517 | -0.899968989 | 0.203040043 | -2.905815475 | 0.003662974 | 0.021902968 |
| DOLK       | 1068.337067 | 0.382427681  | 0.1316046   | 2.905883838  | 0.003662174 | 0.021902968 |
| AARD       | 37.62087249 | 0.898882599  | 0.309384474 | 2.905408561  | 0.00366774  | 0.021924353 |
| BU/OX2     | 51.96982878 | -0.912178362 | 0.139748444 | -2.905252938 | 0.003669489 | 0.021927694 |
| EDA        | 188.9435883 | -0.539777304 | 0.185807193 | -2.905029873 | 0.003672063 | 0.021935965 |
| TMEM618B   | 564.1062632 | 0.379720638  | 0.130734383 | 2.904585553  | 0.003677268 | 0.021959937 |
| MTBP       | 190.5047957 | -0.579347263 | 0.199555728 | -2.903185005 | 0.003693884 | 0.022052018 |
| CELA2A     | 4.798868524 | -1.291839147 | 0.445094614 | -2.902392222 | 0.003703246 | 0.022100745 |
| TSNARE1    | 794.3980844 | -0.328542602 | 0.113219599 | -2.901807143 | 0.003710169 | 0.022117734 |
| ADAO2      | 117.4432703 | 1.214773111  | 0.418617269 | 2.901870521  | 0.003709418 | 0.022117734 |
| AL512506.3 | 37.50130904 | -1.14942062  | 0.393731475 | -2.90030677  | 0.003727976 | 0.022226746 |
| IDO1       | 41.24360777 | 1.555846678  | 0.536525493 | 2.89985601   | 0.003733341 | 0.02224434  |
| TIGAR      | 817.6498313 | 0.415041933  | 0.14312137  | 2.899292843  | 0.003732462 | 0.02224434  |
| PIGL       | 545.484502  | -0.293369691 | 0.101182951 | -2.899398437 | 0.003738794 | 0.022250935 |
| TPP2       | 1723.778331 | -0.266140134 | 0.091795987 | -2.899256726 | 0.003740485 | 0.022250935 |
| LRRCE      | 42.36311401 | 1.227872409  | 0.423512041 | 2.8992621    | 0.003740421 | 0.022250935 |
| KLHDC7A    | 142.1899951 | 1.402420989  | 0.483679399 | 2.899484644  | 0.003737767 | 0.022250935 |
| KLIF1      | 515.0531644 | 0.486968034  | 0.167945804 | 2.89954623   | 0.003736932 | 0.022250935 |
| SUCLG2     | 1347.359377 | -0.442980409 | 0.152799699 | -2.899151785 | 0.003741737 | 0.022251201 |
| VPS4A      | 5632.749108 | 0.351779632  | 0.121355856 | 2.89874501   | 0.003746595 | 0.02227279  |
| ANKK6      | 1798.830346 | 0.296191763  | 0.102187577 | 2.898510474  | 0.003749398 | 0.022282378 |
| SCRN3      | 1178.358401 | -0.400345267 | 0.138150641 | -2.897890041 | 0.003756823 | 0.022313006 |
| NOL4L      | 2107.18637  | -0.317491781 | 0.109585823 | -2.897197585 | 0.003765125 | 0.022361423 |
| ELPS       | 1856.884252 | 0.251573683  | 0.086854337 | 2.896501113  | 0.003773493 | 0.022403899 |
| PRR29      | 165.6902318 | -1.003180602 | 0.346369533 | -2.896272638 | 0.003776242 | 0.022412998 |
| G.PH       | 1201.010659 | -0.59988905  | 0.207138403 | -2.896121829 | 0.003778057 | 0.022416552 |
| ORBG.5     | 1.202892247 | 3.055816315  | 1.055368358 | 2.89549738   | 0.003785582 | 0.022453971 |
| ZNFS85A    | 771.2096131 | -0.260195104 | 0.089898514 | -2.89432041  | 0.003799802 | 0.022531066 |
| SH8P5L     | 2254.33156  | 0.309764437  | 0.107043587 | 2.893815021  | 0.003805912 | 0.022560037 |
| SRSF11     | 6214.002924 | -0.316307731 | 0.109316498 | -2.893504056 | 0.003806964 | 0.022575191 |
| PLF362     | 1900.496288 | -0.309973959 | 0.107150341 | -2.892888229 | 0.003811717 | 0.022609195 |
| TRMT112    | 4411.916408 | 0.382338863  | 0.132170669 | 2.892728517  | 0.003819113 | 0.022609195 |
| PTCRA      | 116.6758447 | 1.012992716  | 0.350177753 | 2.892795757  | 0.003818295 | 0.022609195 |
| CDONF43    | 178.3884152 | 0.342038657  | 0.118254593 | 2.892393418  | 0.003823201 | 0.022626163 |
| ZNF334     | 830.3740088 | -0.359330502 | 0.124237812 | -2.892279711 | 0.003824573 | 0.022626982 |
| PPP1R3E    | 1623.413943 | -0.453450005 | 0.156749438 | -2.892163517 | 0.003825988 | 0.022628089 |
| R818       | 10222.35132 | 0.321398519  | 0.111145604 | 2.891664688  | 0.003832067 | 0.022656773 |
| SILCO3A1   | 3992.224    | -0.604599147 | 0.209122571 | -2.891123343 | 0.003838674 | 0.022679269 |
| CERK       | 2566.931253 | 0.356596082  | 0.123344811 | 2.89105054   | 0.003839564 | 0.022679269 |
| LPH        | 24.5551409  | 0.941193663  | 0.325335722 | 2.891214656  | 0.003837559 | 0.022679269 |
| KIF13A     | 2761.149662 | -0.374062241 | 0.129393983 | -2.890878165 | 0.00384167  | 0.02268099  |
| N.AM0      | 1279.604233 | -0.299816872 | 0.103713245 | -2.890825291 | 0.003842317 | 0.02268099  |
| TM04       | 19.07505263 | -0.91647843  | 0.317041901 | -2.89071705  | 0.00384364  | 0.022681538 |
| FTTM1      | 28.42664398 | 0.71368191   | 0.24689479  | 2.890454638  | 0.00384685  | 0.022693216 |
| RIPD2      | 780.3093274 | 0.679067572  | 0.234967003 | 2.890050466  | 0.003851744 | 0.022714811 |
| ZNFS74     | 998.5904434 | 0.35676947   | 0.123478164 | 2.889332488  | 0.003860606 | 0.022757973 |
| ECE1       | 5882.395533 | 0.447627363  | 0.154943931 | 2.889365393  | 0.003865116 | 0.022764533 |
| ALY8H      | 947.5554728 | 0.352718863  | 0.12108989  | 2.889029588  | 0.003864573 | 0.022764533 |
| NWAP       | 1293.732824 | 0.219230002  | 0.075880629 | 2.889143109  | 0.003862931 | 0.0227      |

|           |             |              |             |              |             |             |
|-----------|-------------|--------------|-------------|--------------|-------------|-------------|
| UNCS      | 1531.23750  | -0.87380541  | 0.302714098 | -2.88565993  | 0.003894662 | 0.023916578 |
| TRM5      | 466.153982  | -0.368835426 | 0.12785948  | -2.884693622 | 0.003917947 | 0.023046239 |
| FDXN1     | 2259.369504 | -0.58400108  | 0.124255616 | -2.884377532 | 0.003921883 | 0.023062022 |
| PYCARD    | 1258.23211  | 0.791465214  | 0.274411159 | 2.884231151  | 0.003923706 | 0.023065385 |
| FRDZ      | 1593.267928 | 0.39396631   | 0.136618441 | 2.883697889  | 0.003930356 | 0.023091709 |
| FBX031    | 2321.48739  | 0.335185248  | 0.116262629 | 2.883000769  | 0.003939065 | 0.023121613 |
| ECSR      | 883.497768  | 0.793232751  | 0.275156475 | 2.883086144  | 0.003937997 | 0.023121613 |
| TMW4      | 3822.501932 | 0.10248067   | 0.10760196  | 2.883153534  | 0.003937155 | 0.023121613 |
| LRC59     | 3393.835288 | 0.347888265  | 0.120676963 | 2.882805023  | 0.003941502 | 0.023133102 |
| GK1       | 309.5337801 | -0.547689056 | 0.190036483 | -2.882020587 | 0.003951339 | 0.023183454 |
| TMEM72    | 5.039614617 | 1.530119262  | 0.530943631 | 2.881886462  | 0.003953021 | 0.023185941 |
| WPS138    | 1428.78287  | -0.65415139  | 0.227021357 | -2.881453094 | 0.003958461 | 0.023203081 |
| LGALS1    | 712.4711648 | 0.397850392  | 0.138069374 | 2.881525284  | 0.003957555 | 0.023203081 |
| TCEA9     | 2771.527762 | 0.329133852  | 0.114306691 | 2.881142171  | 0.003962366 | 0.023218584 |
| ARM3      | 275.6948932 | -0.415501818 | 0.144233667 | -2.880714728 | 0.003967745 | 0.023240018 |
| EDHC24    | 1686.789368 | 0.42290419   | 0.146808539 | 2.88065119   | 0.003965546 | 0.023240018 |
| PLG RT    | 11390.4868  | 0.644389863  | 0.223438819 | 2.880449643  | 0.003971084 | 0.023247492 |
| EDEM1     | 1453.58051  | 0.445418524  | 0.154642838 | 2.8803046    | 0.003972908 | 0.023250782 |
| PLG       | 28.05732056 | -0.712221105 | 0.249030918 | -2.880052444 | 0.00397609  | 0.023262021 |
| CCDC82    | 2444.450443 | -0.510965145 | 0.177431439 | -2.879789217 | 0.003979411 | 0.023274062 |
| LCMT1     | 1871.092253 | 0.362359833  | 0.125849841 | 2.879303093  | 0.003985551 | 0.023302576 |
| FAM1668   | 32.20609626 | -0.810727319 | 0.281614069 | -2.878859436 | 0.003991162 | 0.023323798 |
| TH52      | 3340.957738 | -0.457692792 | 0.159038888 | -2.877867157 | 0.004003737 | 0.023394061 |
| CTBP2     | 1778.154529 | -0.268361231 | 0.093259462 | -2.877576445 | 0.004007428 | 0.023408200 |
| GATA2     | 227.5402579 | 0.6896562    | 0.239718201 | 2.877109948  | 0.004013357 | 0.023435413 |
| AN O1     | 83.79005529 | -0.952998948 | 0.331249164 | -2.876985217 | 0.004014944 | 0.023437252 |
| POLR2J    | 4528.340528 | 0.490431352  | 0.170483814 | 2.876706682  | 0.004018489 | 0.023450519 |
| CDOR2     | 30.7339488  | 0.963743724  | 0.335037266 | 2.876269848  | 0.004020779 | 0.023456451 |
| TL3       | 7543.30965  | 0.439710956  | 0.152870827 | 2.876356311  | 0.004022953 | 0.023461171 |
| AGO2      | 2576.975628 | -0.422088262 | 0.147084924 | -2.875964088 | 0.004027955 | 0.023483451 |
| OR5A      | 193.0645483 | -0.813812473 | 0.283002157 | -2.875640527 | 0.004032086 | 0.023500001 |
| MDG1      | 1362.429764 | 0.47850922   | 0.166432544 | 2.875094073  | 0.004039071 | 0.023531369 |
| PCP2      | 15.45725473 | 1.156229018  | 0.402192919 | 2.874811972  | 0.004042682 | 0.02354696  |
| ADAM28    | 1245.193984 | -0.756747842 | 0.263259689 | -2.874529875 | 0.004046295 | 0.023560559 |
| TRAF3IP2  | 1361.427074 | 0.464076843  | 0.16146263  | 2.874205901  | 0.004050448 | 0.023577292 |
| TTC29     | 25.5577242  | -1.25300098  | 0.391613351 | -2.87349779  | 0.004059539 | 0.023598411 |
| PLM3      | 1693.622654 | -0.537472602 | 0.187049747 | -2.873420624 | 0.004060531 | 0.023598411 |
| GAPPH     | 196509.9123 | 0.474845978  | 0.165360095 | 2.873325093  | 0.004061759 | 0.023598411 |
| SIRP0     | 14.50355674 | 1.194683515  | 0.415779059 | 2.873361227  | 0.004061295 | 0.023598411 |
| PRDX1     | 27422.13463 | 0.444347797  | 0.154629179 | 2.873634851  | 0.004057778 | 0.023598411 |
| PHO5PD1   | 132.9568854 | 1.243350394  | 0.432648363 | 2.873811756  | 0.004055493 | 0.023598411 |
| TMEM235   | 3202.388    | -0.925616917 | 0.331556441 | -2.873166948 | 0.004061793 | 0.023599373 |
| ZNF339    | 744.7369027 | -0.196010575 | 0.068223923 | -2.87320006  | 0.004068258 | 0.023599373 |
| CDOR90    | 1329.7562   | -0.79237552  | 0.275818556 | -2.872814623 | 0.004066328 | 0.023599373 |
| TNFAIP6   | 815.9802838 | 0.766952464  | 0.266962025 | 2.872889744  | 0.00406736  | 0.023599373 |
| NLF16     | 1813.212262 | 0.40132063   | 0.139688487 | 2.872983559  | 0.004066346 | 0.023599373 |
| TMEM168   | 1241.855016 | -0.271482412 | 0.094539888 | -2.871617891 | 0.004083764 | 0.023680605 |
| HTF172    | 1718.424204 | -0.35843015  | 0.124822015 | -2.871529912 | 0.004084901 | 0.023680605 |
| EMD       | 2650.216344 | 0.288077373  | 0.100327006 | 2.871384128  | 0.004086786 | 0.023684408 |
| COX8L     | 1313.602517 | 1.28192648   | 0.448666952 | 2.871155634  | 0.004089741 | 0.023693752 |
| CD8B      | 1095.492924 | -0.599918209 | 0.207635001 | -2.871016377 | 0.004091543 | 0.023696748 |
| ZNF668    | 751.4797203 | 0.335052474  | 0.122998842 | 2.870372334  | 0.004099887 | 0.023737613 |
| GTF2IRD2B | 1550.294473 | -0.305994026 | 0.106630901 | -2.869656193 | 0.004109183 | 0.023783963 |
| CITFD2    | 1824.331832 | 0.660813127  | 0.230296834 | 2.869397361  | 0.004112548 | 0.023795964 |
| CLASP2    | 7951.41409  | -0.576355996 | 0.200908332 | -2.868751093 | 0.004120996 | 0.023837151 |
| ENPFP     | 159.188272  | -0.894906759 | 0.311966427 | -2.868595973 | 0.004122934 | 0.023839959 |
| PRPF4     | 1171.751525 | 0.305307061  | 0.106398993 | 2.868520216  | 0.004123968 | 0.023839959 |
| TRMT11    | 568.1791047 | -0.412066599 | 0.143677741 | -2.867991914 | 0.004130861 | 0.023871846 |
| ANKRD1    | 7992.495997 | 0.404510413  | 0.141091502 | 2.867007658  | 0.004144372 | 0.023938808 |
| FAM92A    | 5487.474133 | -0.231772005 | 0.08084672  | -2.866807793 | 0.004146347 | 0.023946424 |
| RTCB      | 3542.809451 | 0.242429754  | 0.084597946 | 2.865669495  | 0.004161284 | 0.02402516  |
| UPK3B     | 116.246639  | 0.637164173  | 0.222387975 | 2.865101738  | 0.004168753 | 0.024060741 |
| FOSL2     | 3223.978279 | 0.681005338  | 0.237708229 | 2.864791108  | 0.004171685 | 0.024070124 |
| PLAG1     | 162.6940674 | -0.473239418 | 0.165209749 | -2.864476349 | 0.004176993 | 0.024093212 |
| NANP      | 2137.803731 | -0.572386679 | 0.199934298 | -2.863874212 | 0.004184942 | 0.024128551 |
| CCDC102B  | 314.3426466 | -0.448396534 | 0.15657321  | -2.86381389  | 0.004185739 | 0.024128551 |
| CDL0      | 135.5370241 | 0.910479996  | 0.317886094 | 2.863269849  | 0.004192933 | 0.024147363 |
| ZNF442    | 136.4725511 | 0.366714681  | 0.128071353 | 2.863362284  | 0.00419171  | 0.024147363 |
| NDUFB2    | 4102.616488 | 0.367332572  | 0.12828535  | 2.863402337  | 0.004191138 | 0.024147363 |
| BAMBI     | 1110.155445 | 0.459792315  | 0.160617594 | 2.862652728  | 0.004201114 | 0.024186919 |
| ECL21     | 1.68552716  | -1.953442676 | 0.683449818 | -2.862397523 | 0.004204042 | 0.024193807 |
| PPP1R3G   | 279.3445492 | 0.468572029  | 0.163726219 | 2.861924077  | 0.004210778 | 0.024219857 |
| PPP1R18   | 8526.933968 | 0.55050295   | 0.192350437 | 2.861979204  | 0.004210045 | 0.024219857 |
| HK3       | 802.2824974 | 0.919644745  | 0.321358833 | 2.861737884  | 0.004213257 | 0.024226527 |
| NARS      | 6195.597667 | 0.162506603  | 0.056798827 | 2.861090849  | 0.004221861 | 0.024268455 |
| DLL1      | 867.3440792 | -0.621036727 | 0.217089002 | -2.860736526 | 0.004226581 | 0.024288017 |
| COL1N     | 619.9959258 | -0.748284981 | 0.261593361 | -2.860489194 | 0.00422988  | 0.024299393 |
| SUPTFH    | 7076.02371  | 0.17336801   | 0.06199886  | 2.860323591  | 0.004232089 | 0.024304511 |
| CLPP      | 2225.177747 | 0.396903688  | 0.138785754 | 2.85983025   | 0.004238678 | 0.024327188 |
| PLD1      | 6058.260821 | 0.51002091   | 0.178334331 | 2.859914343  | 0.004237554 | 0.024327188 |
| MRPL33    | 2125.015885 | 0.444912057  | 0.155609141 | 2.859164014  | 0.004247591 | 0.024363167 |
| HERP31    | 1104.12372  | 0.298414424  | 0.104368204 | 2.859245533  | 0.004246485 | 0.024363167 |
| EAF1      | 1870.346079 | 0.393234718  | 0.137559888 | 2.858843768  | 0.004254563 | 0.024395562 |
| ATP6V1D   | 4263.557741 | 0.283705079  | 0.099256488 | 2.858307589  | 0.00425914  | 0.024406622 |
| SLAMF1    | 54.612727   | 1.367447792  | 0.478411163 | 2.858308405  | 0.004259062 | 0.024406622 |
| TOGAWAM2  | 356.5017604 | -0.509464226 | 0.178285198 | -2.85758005  | 0.004268849 | 0.024454659 |
| PLK4      | 1422.627123 | -0.881569126 | 0.30854073  | -2.857221356 | 0.004273677 | 0.024473869 |
| GANC      | 808.758501  | -0.290492784 | 0.101672806 | -2.857133538 | 0.004274859 | 0.024473869 |
| STAMPB    | 3433.92724  | -0.304832266 | 0.106744652 | -2.856651462 | 0.004281357 | 0.024503455 |
| CAVIN4    | 101.9754387 | -0.686254463 | 0.240254307 | -2.856366955 | 0.004285196 | 0.024517811 |
| GSTP1     | 14820.83779 | 0.831073804  | 0.290971359 | 2.856204837  | 0.004287384 | 0.024522721 |
| MORC1     | 11.14795332 | -1.36682115  | 0.468031222 | -2.855967834 | 0.004290586 | 0.024533419 |
| TIGD5     | 632.231565  | 0.352606993  | 0.123474436 | 2.855708469  | 0.004294092 | 0.024545852 |
| RBM27     | 3198.888852 | 0.242767335  | 0.085014538 | 2.855597871  | 0.004295588 | 0.024546789 |
| MMPK7     | 2333.417146 | -0.233299052 | 0.081709172 | -2.855237031 | 0.004300472 | 0.02456708  |
| SESTD0    | 3232.273297 | -0.512787457 | 0.179607395 | -2.855047174 | 0.004303044 | 0.024574153 |
| CTSH      | 6308.556468 | 0.655589316  | 0.229731348 | 2.854895168  | 0.004305104 | 0.024578301 |
| SIC7SAM4  | 3039.026492 | 0.214263609  | 0.075069401 | 2.854206937  | 0.004314442 | 0.024616361 |
| WRNS      | 3238.548708 | 0.378271538  | 0.122527134 | 2.854295016  | 0.004313245 | 0.024616361 |
| PPP52     | 581.7968362 | 0.637830579  | 0.223491019 | 2.853942779  | 0.004318021 | 0.024629224 |
| PSMC3     | 6984.830773 | 0.379495865  | 0.132988426 | 2.853600694  | 0.004322683 | 0.024644118 |
| RMC1      | 1106.399013 | 0.175837222  | 0.061622862 | 2.853441359  | 0.004324851 | 0.024652854 |
| IMP2      | 29.87661944 | -0.785016833 | 0.275126752 | -2.85329154  | 0.004326891 | 0.024656854 |
| MOG       | 23533.43878 | -0.87410639  | 0.306374004 | -2.85306971  | 0.004329912 | 0.024666446 |
| ADGRA2    | 844.4821045 | -0.614186842 | 0.215296501 | -2.852748836 | 0.004334286 | 0.024681374 |
| PCCB      | 2287.915388 | -0.238345241 | 0.090572262 | -2.852208561 | 0.00434166  | 0.024718091 |
| WDR24     | 1056.091124 | 0.319891401  | 0.112161931 | 2.852049687  | 0.004343831 | 0.024722811 |
| ZNF205    | 1171.414068 | 0.431816258  | 0.151449619 | 2.851220504  | 0.004355176 | 0.024779725 |
| NASP      | 6248.25572  | -0.412499556 | 0.144692218 | -2.850875897 | 0.004359898 | 0.02479894  |
| SLUFP2    | 23.62892039 | 1.719459844  | 0.6031763   | 2.850675406  | 0.004362648 | 0.024806924 |
| ARF6      | 2944.87694  | 0.341261672  | 0.119723902 | 2.850407907  | 0.004366319 | 0.024820141 |
| DRG2      | 11.19622174 | -0.809750522 | 0.284098583 | -2.850244866 | 0.004368558 | 0.024835211 |
| PHF2      | 2596.050107 | 0.401148501  | 0.140763216 | 2.849810189  | 0.004374533 | 0.024851499 |
| ARHGAP7   | 4729.483490 | -0.379987145 | 0.133351575 | -2.849513724 | 0.00437     |             |

|          |             |              |             |              |             |             |
|----------|-------------|--------------|-------------|--------------|-------------|-------------|
| APMP     | 1738.7810   | 0.232203051  | 0.081508701 | 2.848811315  | 0.004388264 | 0.024898833 |
| FBI1     | 1778.91319  | -0.53923651  | 0.189298076 | -2.84861063  | 0.004391058 | 0.024903679 |
| PLD1     | 1598.392223 | -0.581079612 | 0.203991004 | -2.848555082 | 0.004391825 | 0.024903679 |
| CYH1     | 6344.466069 | -0.599577284 | 0.162659517 | -2.847777875 | 0.004420564 | 0.024956891 |
| F13A1    | 2114.671364 | -1.154529914 | 0.405601238 | -2.847157552 | 0.004411152 | 0.024997887 |
| MCU2     | 1699.067999 | -0.286681464 | 0.100791555 | -2.84628474  | 0.004423262 | 0.025043411 |
| RFNG     | 3010.759352 | 0.386458133  | 0.135787624 | 2.846268886  | 0.004423233 | 0.025043411 |
| NIT1     | 1830.707738 | 0.250910873  | 0.088149614 | 2.846240552  | 0.004421376 | 0.025043411 |
| NMM3     | 344.4720007 | -0.488910319 | 0.171777558 | -2.846179411 | 0.004424726 | 0.025044002 |
| NITR3    | 2316.093477 | -0.640421376 | 0.225023914 | -2.846014738 | 0.004427015 | 0.025049264 |
| DCR      | 3289.409679 | 0.551663293  | 0.193847392 | 2.845863889  | 0.004429112 | 0.02505344  |
| EXO5     | 327.3634879 | 0.434512748  | 0.152688567 | 2.845745135  | 0.004430764 | 0.025055094 |
| BBM5     | 6573.928041 | -0.254361148 | 0.089407592 | -2.844961378 | 0.004441681 | 0.025106196 |
| CHFR     | 1711.453149 | 0.274905202  | 0.096630857 | 2.844900799  | 0.004442526 | 0.025106196 |
| DEA      | 1133.869782 | -0.377952147 | 0.095948747 | -2.844770311 | 0.004444345 | 0.025108782 |
| ZIPP9    | 229.1521687 | -0.40956545  | 0.144032795 | -2.843557705 | 0.004461293 | 0.025196803 |
| TRAPCL3  | 877.1652837 | -0.393810201 | 0.188523362 | -2.842915728 | 0.004470289 | 0.025233125 |
| PGD      | 5322.435633 | 0.261218339  | 0.091884354 | 2.842903354  | 0.004470462 | 0.025233125 |
| MSR2     | 1970.963338 | 0.521805081  | 0.183553163 | 2.842800621  | 0.004471901 | 0.025233515 |
| ARVC6    | 1694.74402  | 0.305811437  | 0.1075817   | 2.842597172  | 0.004474759 | 0.025241913 |
| GPRC3C   | 1181.734747 | 0.551805048  | 0.194131441 | 2.842450681  | 0.004476816 | 0.025245788 |
| UBQLN4   | 3538.103712 | 0.281877297  | 0.099194238 | 2.841670072  | 0.004487791 | 0.025299938 |
| NUCCD2   | 1502.595922 | -0.280255636 | 0.098648335 | -2.841057366 | 0.004496422 | 0.025340846 |
| PICALM   | 9127.818554 | -0.356331006 | 0.125445758 | -2.840519292 | 0.004504015 | 0.025360952 |
| FOLH1    | 4067.989415 | -0.820692961 | 0.28892431  | -2.840511968 | 0.004504118 | 0.025360952 |
| TST      | 1937.797291 | 0.565202752  | 0.198975864 | 2.840559361  | 0.004503449 | 0.025360952 |
| CRAT     | 3484.770497 | 0.338294958  | 0.1191076   | 2.840246963  | 0.004507862 | 0.025374275 |
| CTSS     | 4964.919014 | 0.338492542  | 0.295253347 | 2.839902698  | 0.004512645 | 0.025393444 |
| BNASE4   | 600.9948421 | 0.487104049  | 0.171545188 | 2.839511298  | 0.00451827  | 0.025409578 |
| IL1B1    | 88.11439812 | 0.82091382   | 0.310646545 | 2.83953303   | 0.00451795  | 0.025409578 |
| CFAP54   | 299.26584   | -0.555834198 | 0.195763948 | -2.839308272 | 0.004521446 | 0.025417996 |
| SYAP1    | 2184.619057 | 0.209188488  | 0.073693968 | 2.838610708  | 0.00453104  | 0.025465853 |
| RPUSDA   | 856.2496484 | 0.194121167  | 0.068393613 | 2.838293794  | 0.004535541 | 0.025483382 |
| MFN1     | 1490.376653 | -0.229857092 | 0.081013288 | -2.837276423 | 0.004550002 | 0.02555694  |
| GL11     | 188.7154899 | 1.647872247  | 0.580927737 | 2.836630343  | 0.004559236 | 0.025600904 |
| OSGEP1   | 407.3323254 | -0.429140782 | 0.151299325 | -2.836369437 | 0.004562963 | 0.025614026 |
| NMP7     | 5512.506889 | -0.703911665 | 0.248190788 | -2.836171607 | 0.004565791 | 0.025617903 |
| SASS6    | 184.3501137 | -0.444082028 | 0.156880053 | -2.836134094 | 0.004566327 | 0.025617903 |
| TMEM101  | 1292.284868 | 0.35061452   | 0.123628496 | 2.836033202  | 0.00456777  | 0.025617958 |
| SLC28A3  | 18.28885013 | 1.084804293  | 0.382527963 | 2.835887337  | 0.004569928 | 0.025621905 |
| CRBN     | 2492.576055 | -0.400873586 | 0.141369464 | -2.835644797 | 0.004573328 | 0.025633169 |
| SMPL3A   | 739.1062122 | 0.601185613  | 0.212011165 | 2.835364488  | 0.004577343 | 0.025647871 |
| SLC44A1  | 17329.57385 | 0.601432561  | 0.212148821 | 2.834958008  | 0.004583203 | 0.025669347 |
| RGAA3    | 3444.583487 | -0.395607344 | 0.139550927 | -2.834858009 | 0.004584697 | 0.025669347 |
| PPAD     | 2723.573954 | -0.246141057 | 0.086828188 | -2.834805809 | 0.004585354 | 0.025669347 |
| TRDR     | 154.5021949 | 0.725620237  | 0.255990305 | 2.834561401  | 0.004588864 | 0.025681194 |
| AMP1A    | 34.95902406 | -1.085708029 | 0.383088336 | -2.834093151 | 0.004595593 | 0.02570281  |
| PTPR     | 2854.834394 | -0.292550895 | 0.10322891  | -2.83400159  | 0.00459691  | 0.02570281  |
| CCDC106  | 2764.382025 | 0.444661329  | 0.157532104 | 2.834097416  | 0.004595532 | 0.02570281  |
| CYREN    | 1301.805909 | 0.325760363  | 0.114977165 | 2.833261388  | 0.004607569 | 0.025745493 |
| IL24     | 5.692574474 | 1.977915648  | 0.698135199 | 2.833141279  | 0.004609301 | 0.025756461 |
| STIP1    | 4650.736658 | 0.273488471  | 0.096539711 | 2.832911628  | 0.004612614 | 0.025761758 |
| ECHS1    | 5332.321232 | 0.42296862   | 0.149322311 | 2.832588224  | 0.004617282 | 0.025785423 |
| RFX4     | 2310.639374 | -0.64590771  | 0.228105975 | -2.831612409 | 0.004631395 | 0.025856401 |
| CFAP69   | 237.449519  | -0.515868242 | 0.182214257 | -2.831108    | 0.004638708 | 0.025882327 |
| TMOM5    | 2111.276012 | 0.375671747  | 0.132694708 | 2.831098188  | 0.004638848 | 0.025882327 |
| RIIIBL2  | 3588.863056 | 0.414895771  | 0.146563322 | 2.830829469  | 0.004642747 | 0.025888409 |
| GRID7    | 6.68235749  | 1.93268978   | 0.68271928  | 2.830686003  | 0.004642174 | 0.025888409 |
| TMMA4    | 1937.684909 | 0.296524017  | 0.104767325 | 2.830386725  | 0.004649177 | 0.025908583 |
| CBDOA    | 1538.973905 | 0.730489927  | 0.258080824 | 2.830469598  | 0.004647973 | 0.025908583 |
| POLL     | 1395.466321 | 0.307545285  | 0.108679421 | 2.82983919   | 0.004657141 | 0.025945117 |
| NSRP1    | 1755.002506 | -0.282480119 | 0.099846021 | -2.829157513 | 0.004667072 | 0.025992588 |
| LRCRD    | 3160.121489 | -0.442253403 | 0.156330765 | -2.828959499 | 0.004669961 | 0.026000818 |
| SIRP     | 16.30059744 | -1.077224782 | 0.380802926 | -2.828824851 | 0.004671926 | 0.026003903 |
| CFAP47   | 52.65090704 | -1.076392288 | 0.380568788 | -2.82837774  | 0.004678457 | 0.02601668  |
| SLC35B4  | 2132.799052 | 0.205134378  | 0.072526245 | 2.828415805  | 0.0046779   | 0.02601668  |
| FAM98C   | 1584.367632 | 0.392732241  | 0.138850345 | 2.828457076  | 0.004677297 | 0.02601668  |
| ANAPC11  | 3357.318824 | 0.414853436  | 0.146700029 | 2.827902894  | 0.004685402 | 0.026047441 |
| PIG M    | 1277.63474  | -0.84952888  | 0.298921189 | -2.826674454 | 0.004703412 | 0.026131798 |
| IRS3     | 376.5288041 | 0.956557807  | 0.338401905 | 2.826691823  | 0.004703157 | 0.026131798 |
| ERC      | 1910.416689 | 0.544799909  | 0.192765878 | 2.826232583  | 0.004710005 | 0.02616054  |
| CFAP46   | 281.690908  | -0.671975008 | 0.237782938 | -2.826002113 | 0.004713295 | 0.026170931 |
| TRIM3    | 1176.170918 | 0.222218554  | 0.078653505 | 2.825284819  | 0.00472386  | 0.026221694 |
| BABAM1   | 4451.567281 | 0.311467624  | 0.110280447 | 2.824321182  | 0.004738058 | 0.026297586 |
| UCP3     | 100.6384587 | -0.510322457 | 0.180703365 | -2.824089403 | 0.004741516 | 0.026303851 |
| MEIOC    | 35.84519162 | 0.533108786  | 0.188809857 | 2.823521995  | 0.004749917 | 0.026334601 |
| SLC39A7  | 4947.25152  | 0.381206807  | 0.135010064 | 2.823543636  | 0.004749596 | 0.026334601 |
| PSG2     | 24.82511671 | 0.790827698  | 0.280995304 | 2.823423616  | 0.004751375 | 0.026334762 |
| FUCA2    | 3224.298871 | 0.398358725  | 0.141099458 | 2.823247743  | 0.004753982 | 0.026341293 |
| MYO19    | 1284.632404 | -0.341307965 | 0.120913402 | -2.82274185  | 0.00476141  | 0.02637452  |
| RAD17    | 1178.708307 | -0.201338993 | 0.071334197 | -2.822475089 | 0.004765452 | 0.026388979 |
| NKAN2    | 2742.568274 | -0.948711721 | 0.336178417 | -2.822048276 | 0.004771999 | 0.026411054 |
| NRIP2    | 579.9256297 | -0.877735903 | 0.3110317   | -2.822014293 | 0.004772305 | 0.026411054 |
| COPA     | 8058.831244 | -0.309735962 | 0.109768881 | -2.821751205 | 0.004776757 | 0.026477795 |
| VP54     | 1018.464288 | 0.397341781  | 0.105383382 | 2.821470822  | 0.004780399 | 0.026493966 |
| SEC61G   | 2438.16899  | 0.562118629  | 0.199255296 | 2.821097576  | 0.004785964 | 0.026462807 |
| TMMD9    | 638.9487654 | 0.263885889  | 0.092657211 | 2.820580103  | 0.004793669 | 0.026497576 |
| ZNF720   | 529.5431871 | -0.272756959 | 0.096711024 | -2.820329536 | 0.004797435 | 0.026510326 |
| AGAP6    | 738.852907  | -0.597183782 | 0.211813302 | -2.819387533 | 0.004811539 | 0.026580293 |
| SMTN     | 1917.779257 | 0.537747426  | 0.190761148 | 2.819097422  | 0.00481589  | 0.026588387 |
| LMXD1    | 805.4191398 | 0.479662841  | 0.170145919 | 2.819126138  | 0.004815456 | 0.026588387 |
| H6F1     | 3735.349641 | 0.30737522   | 0.109090623 | 2.817613581  | 0.0048382   | 0.02670356  |
| ASCL2    | 190.5196553 | 0.840141066  | 0.298186299 | 2.817503918  | 0.004839852 | 0.026704683 |
| ECH      | 5770.355294 | 0.367251497  | 0.130381335 | 2.816749008  | 0.004851242 | 0.026759515 |
| MRPL32   | 1553.651677 | 0.345277808  | 0.122620589 | 2.815822449  | 0.004852555 | 0.026828779 |
| HPA2     | 358.9498799 | 0.377049092  | 0.13395008  | 2.814847822  | 0.004880034 | 0.026902226 |
| CEBP     | 1890.588231 | 0.290121104  | 0.10308076  | 2.814503508  | 0.004885264 | 0.026923008 |
| DRF1     | 666.4136109 | -0.316141842 | 0.112350446 | -2.813890433 | 0.004894591 | 0.026966342 |
| TKC4     | 40.05135188 | 0.738139305  | 0.262347238 | 2.813586563  | 0.004899065 | 0.0269734   |
| RLF4     | 698.5282824 | 0.634355133  | 0.225466876 | 2.813518099  | 0.004900263 | 0.0269734   |
| USP1     | 6788.752889 | 0.293197525  | 0.104207893 | 2.813582691  | 0.004899278 | 0.0269734   |
| FLYW/CH2 | 1489.180506 | 0.382221137  | 0.135876122 | 2.813011809  | 0.004907985 | 0.027007839 |
| RAPGEFS  | 9517.634764 | -0.778874508 | 0.276904689 | -2.812789166 | 0.004911384 | 0.027018477 |
| WDFY3    | 4715.018099 | -0.55981809  | 0.199064471 | -2.812245132 | 0.004919699 | 0.027056145 |
| REG1A    | 2.19282894  | -2.2005167   | 0.782331473 | -2.812048813 | 0.004922703 | 0.027058512 |
| CDK19    | 3760.636138 | -0.516743194 | 0.183761944 | -2.812025081 | 0.004923066 | 0.027058512 |
| SMCP     | 1.141444268 | 3.318163848  | 1.180137204 | 2.811676335  | 0.004928407 | 0.027079788 |
| TSTO2    | 1201.923887 | -0.304641966 | 0.108358139 | -2.81143594  | 0.004932091 | 0.027091954 |
| SURF1    | 2224.309428 | 0.379269306  | 0.134918683 | 2.811095525  | 0.004937312 | 0.027112554 |
| FNDC4    | 2741.904599 | 0.429848454  | 0.152920616 | 2.810925466  | 0.004939923 | 0.027118807 |
| THP3     | 1059.700353 | 0.347254079  | 0.123542831 | 2.810799107  | 0.004941863 | 0.02712138  |
| ZNF471   | 1264.129374 | -0.487005209 | 0.173279829 | -2.810516813 | 0.0049462   | 0.027129913 |
| IRAP1    | 8986.730863 | 0.574623717  | 0.204455939 | 2.810506296  | 0.004946363 | 0.027129913 |
| MYD88    | 1984.468892 | 0.616472409  | 0.219358369 | 2.810343765  | 0.004948611 | 0.027135543 |

|           |             |              |             |              |             |             |
|-----------|-------------|--------------|-------------|--------------|-------------|-------------|
| WVK1      | 20499.001   | -0.61131291  | 0.217613123 | -2.809171101 | 0.004966893 | 0.027195996 |
| WB11FP4   | 8965.170222 | -0.56987693  | 0.202864616 | -2.809149024 | 0.004967265 | 0.027195996 |
| SDZ L1    | 1006.785927 | 0.565681023  | 0.201364421 | -2.809240191 | 0.004966588 | 0.027195996 |
| ARHGAP3   | 3963.988063 | -0.471560752 | 0.167882968 | -2.808865957 | 0.004971634 | 0.027211884 |
| TAS2B50   | 1.38878609  | -1.41882233  | 0.50515534  | -2.80886561  | 0.00497442  | 0.027218997 |
| COL5A2    | 1516.849973 | -0.647891107 | 0.230698213 | -2.808392392 | 0.004978952 | 0.027235709 |
| ANKRD40   | 9960.502908 | -0.536952667 | 0.198326757 | -2.808257824 | 0.004981033 | 0.027239008 |
| ZEB1      | 114.9912563 | -0.717426158 | 0.255484683 | -2.808098518 | 0.004983498 | 0.027240009 |
| PI4KB     | 5072.926655 | 0.192468631  | 0.068543949 | 2.807959453  | 0.00498565  | 0.027240009 |
| YFP1      | 1464.46468  | 0.305142861  | 0.108670006 | 2.807976837  | 0.004985381 | 0.027240009 |
| USP27X    | 281.4138564 | 0.470436863  | 0.16757524  | 2.807317254  | 0.004995602 | 0.027278205 |
| CD200A7   | 2554.721716 | 0.436213241  | 0.155383372 | 2.807335394  | 0.00499532  | 0.027278205 |
| CDHR3     | 236.7446131 | -0.592448023 | 0.211056826 | -2.807054549 | 0.004999677 | 0.027284292 |
| LEO1      | 1001.728861 | 0.245705239  | 0.087528965 | 2.807130629  | 0.004998497 | 0.027284292 |
| NAG11     | 1715.617972 | -0.511695441 | 0.182314743 | -2.806659704 | 0.005005809 | 0.027309668 |
| NLH8      | 1500.679282 | -0.189760044 | 0.067616306 | -2.806424366 | 0.005009467 | 0.027313908 |
| YBEY      | 840.358403  | 0.524590238  | 0.186829194 | 2.806357991  | 0.005010499 | 0.02731906  |
| IKZF2     | 432.7152748 | -0.586403178 | 0.20897888  | -2.806053704 | 0.005015233 | 0.027336804 |
| ENPP2     | 15639.61306 | -0.72969909  | 0.260056089 | -2.805929651 | 0.005017164 | 0.027339244 |
| GZMK      | 82.0555253  | -1.056997783 | 0.376836768 | -2.804922109 | 0.005032874 | 0.027416741 |
| SLC25A35  | 533.0376483 | -0.365244157 | 0.130222937 | -2.804760552 | 0.005033397 | 0.027422238 |
| MTOR      | 2761.468054 | -0.25382724  | 0.090608118 | -2.804456935 | 0.005040142 | 0.027440111 |
| RANGF     | 1137.305306 | 0.417929103  | 0.149040289 | 2.804135093  | 0.005045176 | 0.027455406 |
| NME8      | 41.95822542 | -0.99306601  | 0.354381045 | -2.803780323 | 0.00505073  | 0.02747341  |
| NRM       | 661.3952384 | 0.653880063  | 0.23212339  | 2.803797031  | 0.005050469 | 0.02747341  |
| CYS12R2   | 147.1339069 | -0.826640111 | 0.294938854 | -2.802750812 | 0.005056688 | 0.027553123 |
| PUS7L     | 873.7473511 | -0.336825776 | 0.120227228 | -2.801547175 | 0.005085395 | 0.027645647 |
| DNACS     | 7645.955334 | 0.278627203  | 0.099470576 | 2.801101722  | 0.005092846 | 0.02767799  |
| PIBF1     | 338.458501  | 0.377872441  | 0.134006519 | 2.800993831  | 0.005094549 | 0.027679083 |
| SPATS2L   | 3816.763562 | -0.337768013 | 0.120625125 | -2.800146426 | 0.005107943 | 0.027743673 |
| PPM1N     | 598.887678  | 0.599686842  | 0.214171683 | 2.799943637  | 0.005111553 | 0.027744754 |
| MUC3A     | 44.73586197 | 1.271128725  | 0.453960264 | 2.800032582  | 0.005109745 | 0.027744754 |
| PPM1G     | 3986.728113 | 0.38589908   | 0.137852917 | 2.799333803  | 0.005120025 | 0.027787306 |
| NVAL1     | 149.1443809 | 0.677395963  | 0.242033068 | 2.798774429  | 0.005129696 | 0.027812641 |
| PPIC      | 514.9871524 | 0.65019079   | 0.201878083 | 2.798813347  | 0.005129078 | 0.027812641 |
| MBDL3     | 1.667392682 | 3.446189909  | 1.231297129 | 2.798828835  | 0.005128832 | 0.027812641 |
| CLASP8    | 4327.90884  | -0.348634888 | 0.124589724 | -2.798263671 | 0.005137815 | 0.02783302  |
| TMEM119   | 1415.209182 | -0.79132081  | 0.28279102  | -2.79825297  | 0.005137985 | 0.02783302  |
| KLHL36    | 1749.494105 | 0.308832759  | 0.110360407 | 2.798401781  | 0.005135619 | 0.02783302  |
| NKNK1     | 2491.206632 | -0.298240204 | 0.106596299 | -2.797847653 | 0.005144437 | 0.02785978  |
| ARPC2     | 9701.450027 | 0.280242234  | 0.100171582 | 2.797622117  | 0.005148083 | 0.027871045 |
| NKG7      | 187.9352304 | 0.988126909  | 0.321125581 | 2.797411773  | 0.005151065 | 0.027879286 |
| SNY27     | 2839.544508 | -0.231081163 | 0.082609971 | -2.797268641 | 0.005153666 | 0.027885178 |
| UCN2      | 74.57402704 | 1.193509201  | 0.426721479 | 2.796927276  | 0.005159105 | 0.027906411 |
| SGM1      | 1332.721488 | -0.517480853 | 0.185032342 | -2.796704878 | 0.005162667 | 0.027909294 |
| SERPINA1  | 3667.677291 | 0.584555734  | 0.306950841 | 2.796720576  | 0.005162416 | 0.027909294 |
| DUSP27    | 52.62689668 | -0.800382503 | 0.286292285 | -2.795683998 | 0.005179016 | 0.027986981 |
| HIT1B     | 7.016693227 | 1.631623807  | 0.583636383 | 2.795617022  | 0.005180074 | 0.027986981 |
| PSMD7     | 4399.760121 | 0.220033751  | 0.078721403 | 2.79509439   | 0.005188456 | 0.028024051 |
| GIN1      | 332.0910194 | -0.332814338 | 0.119098905 | -2.794451486 | 0.005199363 | 0.028059793 |
| NWRAS     | 486.8930394 | -0.936124666 | 0.335006017 | -2.794351797 | 0.005200387 | 0.028059793 |
| MDN2      | 2343.195614 | -0.38396835  | 0.137410012 | -2.794325668 | 0.005200804 | 0.028059793 |
| COL9A1    | 377.9130804 | -1.066718893 | 0.381747687 | -2.794303488 | 0.005201164 | 0.028059793 |
| NFO1C     | 2372.276967 | 0.422383608  | 0.147601885 | 2.793891203  | 0.00520278  | 0.028079151 |
| SELENOH   | 3962.141928 | 0.422420742  | 0.151190608 | 2.793961567  | 0.005206667 | 0.028079151 |
| SRP14     | 12448.78164 | 0.248376425  | 0.088939338 | 2.792649815  | 0.005227825 | 0.02817888  |
| RBTDL     | 785.7111423 | -0.504924626 | 0.18081366  | -2.792514048 | 0.005232002 | 0.028183466 |
| PRPH1     | 484.5682127 | 0.924814528  | 0.331188862 | 2.79240633   | 0.005231729 | 0.028183466 |
| PNV       | 8439.470823 | -0.297989695 | 0.10671958  | -2.792268133 | 0.005233996 | 0.028183914 |
| MRPL51    | 4363.154501 | 0.381869555  | 0.136762297 | 2.792213742  | 0.005234876 | 0.028183914 |
| SLC9A1    | 1642.606672 | 0.436266316  | 0.156286939 | 2.791454247  | 0.005247178 | 0.028241891 |
| F1BP      | 3995.227099 | 0.372660465  | 0.133607171 | 2.791314215  | 0.005249448 | 0.028245864 |
| CFB1      | 82.02140989 | -1.012929084 | 0.36290463  | -2.791171569 | 0.005251763 | 0.028250068 |
| FLVCR2    | 647.9236988 | 0.699026016  | 0.250649098 | 2.789976188  | 0.005271192 | 0.028346307 |
| SF3B1     | 10921.2497  | -0.303288384 | 0.108728452 | -2.789411392 | 0.005280394 | 0.028387511 |
| ANTXR1    | 3657.170641 | -0.575286545 | 0.206294295 | -2.788669198 | 0.005292509 | 0.028437673 |
| CASP6     | 368.0051489 | 0.436623702  | 0.15657167  | 2.788650721  | 0.005292811 | 0.028437673 |
| FRAT2     | 509.6833939 | 0.330036648  | 0.118362698 | 2.788350127  | 0.005297725 | 0.028447489 |
| GSTK1     | 5186.133712 | 0.353029655  | 0.126607505 | 2.78837888   | 0.00529726  | 0.028447489 |
| NZDFB2    | 6508.830602 | 0.464821051  | 0.166721151 | 2.788014888  | 0.005303211 | 0.028468648 |
| EPFB2     | 18.3657174  | -1.453678567 | 0.521424409 | -2.787845234 | 0.005305989 | 0.028475266 |
| CHPT1     | 2890.44482  | 0.323800207  | 0.116183833 | 2.786965001  | 0.005320422 | 0.028544415 |
| MRPL34    | 2111.232043 | 0.286551288  | 0.102822657 | 2.78680624   | 0.005322301 | 0.028546181 |
| SEC12A    | 1438.205992 | -0.417636941 | 0.149871604 | -2.786631544 | 0.0053259   | 0.028557174 |
| DGAT1     | 1758.126351 | 0.358256972  | 0.128573905 | 2.786389089  | 0.005329885 | 0.028570232 |
| ZFP28     | 710.9323057 | -0.285066581 | 0.102512045 | -2.786078278 | 0.005349999 | 0.028589326 |
| NDFB7     | 7684.455708 | 0.544217601  | 0.195360542 | 2.785708905  | 0.005341081 | 0.02861316  |
| ZBTB20    | 4028.35527  | -0.45776906  | 0.164336483 | -2.785559495 | 0.005343543 | 0.028617696 |
| ATXN2     | 2559.365341 | -0.308093044 | 0.110614446 | -2.785287581 | 0.005348027 | 0.028617696 |
| LIX1      | 1939.845614 | 0.214650201  | 0.077065774 | 2.785285745  | 0.005348057 | 0.028617696 |
| TEX264    | 2829.051821 | 0.329471217  | 0.118288113 | 2.785328196  | 0.005347357 | 0.028617696 |
| HSP9A     | 12161.80504 | 0.152732695  | 0.054854665 | 2.784376421  | 0.005363075 | 0.028689729 |
| FBLX7     | 1616.587797 | -0.622951313 | 0.223779408 | -2.78377407  | 0.005373045 | 0.028730711 |
| HLY       | 8.08213271  | 2.750999909  | 0.98823648  | 2.783442999  | 0.005378531 | 0.028730711 |
| RIK       | 16.29559665 | 1.179970031  | 1.779970031 | 2.783490365  | 0.005377748 | 0.028730711 |
| RAMD29A   | 526.6344033 | 0.385464249  | 0.138480099 | 2.783336137  | 0.005376987 | 0.028730711 |
| OGFOD3    | 1615.066421 | 0.293578043  | 0.105464865 | 2.783657242  | 0.005374979 | 0.028730711 |
| LHA       | 15103.70609 | 0.514284629  | 0.184775687 | 2.783291667  | 0.005381041 | 0.028735787 |
| COL4A1    | 6778.483792 | -0.937743636 | 0.336997422 | -2.782643351 | 0.005391804 | 0.028784924 |
| EFCAB6    | 122.7187138 | -0.529684778 | 0.190370526 | -2.782388584 | 0.005396039 | 0.02879919  |
| HCK       | 162.4918173 | -0.360655043 | 0.129639451 | -2.781985263 | 0.005402749 | 0.028826655 |
| TRIM6     | 168.8374581 | 0.810557863  | 0.291370882 | 2.781876686  | 0.005404557 | 0.028827955 |
| EFCAB2    | 867.2144106 | -0.368458937 | 0.132050663 | -2.780699132 | 0.005424198 | 0.028898519 |
| DNDD2     | 38866.17019 | -0.722700194 | 0.259923651 | -2.780432602 | 0.005428653 | 0.028898519 |
| N1RP2B    | 4.088731327 | -1.147426492 | 0.412682129 | -2.78041362  | 0.005428991 | 0.028898519 |
| AC70101.1 | 13.52201388 | -0.847943315 | 0.304979134 | -2.780332291 | 0.005430331 | 0.028898519 |
| AC70101.2 | 13.52201388 | -0.847943315 | 0.304979134 | -2.780332291 | 0.005430331 | 0.028898519 |
| AC70101.3 | 13.52201388 | -0.847943315 | 0.304979134 | -2.780332291 | 0.005430331 | 0.028898519 |
| AC70101.4 | 13.52201388 | -0.847943315 | 0.304979134 | -2.780332291 | 0.005430331 | 0.028898519 |
| AC70101.5 | 13.52201388 | -0.847943315 | 0.304979134 | -2.780332291 | 0.005430331 | 0.028898519 |
| WFO1A     | 57.65385182 | 0.656648598  | 0.239746732 | 2.780636051  | 0.005452239 | 0.028898519 |
| VSN2      | 14.28920488 | -0.986470895 | 0.35485413  | -2.77994353  | 0.005457003 | 0.02882171  |
| KCNQ1     | 582.2973748 | -0.68905663  | 0.247872417 | -2.779884756 | 0.005437828 | 0.02882171  |
| AGAP1     | 6194.397261 | -0.608441414 | 0.219001598 | -2.778251019 | 0.005465238 | 0.029059109 |
| ATG4D     | 1303.69431  | 0.334849549  | 0.120541503 | 2.777877668  | 0.005471521 | 0.029084127 |
| DNAC2     | 991.217009  | 0.315251462  | 0.113496249 | 2.777637723  | 0.005475563 | 0.029097218 |
| RID6      | 546.1401786 | 0.900227383  | 0.212609858 | 2.777411781  | 0.005479371 | 0.029109061 |
| KIRREL3   | 1561.073324 | -0.74181742  | 0.267133224 | -2.77695679  | 0.005487047 | 0.029141439 |
| TENM4     | 1566.074586 | -0.624935408 | 0.225201768 | -2.775000223 | 0.005520133 | 0.029307842 |
| NPC2      | 14376.04016 | 0.643133526  | 0.231774886 | 2.774824511  | 0.00552315  | 0.029307842 |
| ST3GAL2   | 1281.897523 | 0.322362727  | 0.116171635 | 2.774883269  | 0.005522152 | 0.029307842 |
| PDAS      | 391.3494578 | 0.544910825  | 0.196503868 | 2.773028517  | 0.005535725 | 0.029461602 |
| PCYC3     | 854.985948  | 0.375936616  | 0.135659888 | 2.77117623   | 0.005585419 | 0.029621204 |
| TEN2      | 1422.13885  | -0.27542955  | 0.094116623 | -2.77        |             |             |

|               |             |              |             |              |             |             |
|---------------|-------------|--------------|-------------|--------------|-------------|-------------|
| RHPD3         | 666.045587  | -0.58624531  | 0.211699979 | -2.76927238  | 0.005618942 | 0.02975107  |
| RTLL-TMFR5F68 | 778.553469  | -0.55445707  | 0.20022872  | -2.76908979  | 0.00562112  | 0.02975107  |
| CZCDA         | 28.1610660  | 0.997683676  | 0.36031659  | 2.76890870   | 0.005624436 | 0.02975107  |
| PMFPI         | 112.870377  | 0.69763222   | 0.251948838 | 2.768943996  | 0.00562381  | 0.02975107  |
| C6or48        | 3683.17808  | 0.773943847  | 0.279490616 | 2.769122836  | 0.005620744 | 0.02975107  |
| GSDWA         | 129.722281  | 1.171577591  | 0.423145933 | 2.768731776  | 0.005627494 | 0.029758707 |
| AUH           | 643.318464  | -0.369359323 | 0.133443848 | -2.767900712 | 0.005641864 | 0.029826137 |
| AD74143.1     | 1455.71382  | 0.989799809  | 0.357615752 | 2.767774638  | 0.005644047 | 0.02982912  |
| BCKD8         | 1004.383078 | -0.498443335 | 0.180010424 | -2.767528715 | 0.005648307 | 0.02983769  |
| CL10f54       | 950.3814667 | -0.398479233 | 0.143995295 | -2.767307031 | 0.005652145 | 0.02983769  |
| EBPL          | 536.1043579 | 0.288072297  | 0.104098506 | 2.767352835  | 0.005651355 | 0.02983769  |
| ABC47         | 1362.292465 | 0.438448566  | 0.158428929 | 2.767478512  | 0.005649177 | 0.02983769  |
| FAM1338       | 947.5497334 | -0.216551464 | 0.078271643 | -2.766665638 | 0.005663281 | 0.02989771  |
| STGALNACT     | 1093.838841 | -0.682456814 | 0.246720913 | -2.766108501 | 0.005672966 | 0.029930456 |
| GATD38        | 4844.936385 | 0.370790961  | 0.133879817 | 2.765846046  | 0.005677533 | 0.029945981 |
| GRTG3         | 2822.46324  | -0.317011621 | 0.114643008 | -2.765205373 | 0.005686697 | 0.029996278 |
| NBD4          | 1906.59003  | 0.221443093  | 0.080085239 | 2.765092504  | 0.005690666 | 0.029998077 |
| PPMH          | 1899.947208 | -0.608089755 | 0.219565844 | -2.764473543 | 0.005710473 | 0.030041952 |
| CY86LD2       | 943.8076691 | 0.396761669  | 0.143528748 | 2.76433588   | 0.005703879 | 0.030041952 |
| WDR83         | 857.443980  | 0.384919271  | 0.139243916 | 2.764352528  | 0.005703588 | 0.030041952 |
| FRCCG2        | 643.388905  | -0.379053086 | 0.137127858 | -2.764231082 | 0.005705712 | 0.030043017 |
| CCDC12        | 1826.97963  | 0.46299643   | 0.167651508 | 2.763308042  | 0.005721874 | 0.030119512 |
| NXT1          | 661.9847817 | 0.49782479   | 0.180173136 | 2.763035612  | 0.005726652 | 0.030127452 |
| NRP153        | 2022.417089 | 0.437291008  | 0.15826258  | 2.763073227  | 0.005725992 | 0.030127452 |
| NTRK1         | 36.0061014  | -0.674083795 | 0.244057831 | -2.761983881 | 0.005745131 | 0.030212358 |
| C6P3          | 1366.290913 | 0.367238571  | 0.132964447 | 2.761905795  | 0.00574607  | 0.030212358 |
| HLAC          | 51389.4643  | 0.604917131  | 0.219885957 | 2.761094961  | 0.005760792 | 0.03028113  |
| LONP2         | 3755.93327  | -0.232766909 | 0.084124206 | -2.760996993 | 0.005762473 | 0.030281328 |
| EDV           | 2190.13265  | 0.369889131  | 0.097711689 | 2.760049831  | 0.005779255 | 0.030360856 |
| RTAN          | 7969.353192 | -0.505224127 | 0.183066306 | -2.759786725 | 0.005783911 | 0.030376657 |
| BH4CC1        | 2527.843824 | -0.414778613 | 0.150005219 | -2.759575617 | 0.005787649 | 0.030387631 |
| HS3T1         | 407.8314047 | 0.535585803  | 0.194154743 | 2.758551219  | 0.005805211 | 0.030473357 |
| PLEK48        | 1191.264519 | -0.434729583 | 0.157616015 | -2.758156166 | 0.005812842 | 0.030505252 |
| MNRIP         | 1707.160433 | -0.220917626 | 0.080118826 | -2.757374729 | 0.005826753 | 0.030560281 |
| DRG 1         | 1916.555853 | 0.27539911   | 0.099878122 | 2.757351626  | 0.005827165 | 0.030560281 |
| QR4D1         | 13.57424717 | 0.886103913  | 0.321524963 | 2.755941266  | 0.00585235  | 0.030683632 |
| SGCE          | 2293.448183 | -0.310936829 | 0.112828499 | -2.75583591  | 0.005854236 | 0.030684787 |
| SCO2          | 979.3680114 | 0.593986577  | 0.215548398 | 2.755699365  | 0.00585668  | 0.03068887  |
| PLC1          | 2467.408844 | -0.795910864 | 0.288848155 | -2.755464592 | 0.005860885 | 0.030702173 |
| PTG R1        | 1191.688566 | 0.27849582   | 0.101093861 | 2.754824244  | 0.005872367 | 0.030735382 |
| MRCC6         | 9736.136894 | 0.29245871   | 0.094112745 | 2.754654483  | 0.005875576 | 0.030761646 |
| CTNND2        | 11050.4545  | -0.70866127  | 0.257367636 | -2.754294141 | 0.005881888 | 0.030785945 |
| EDW2          | 1166.28311  | 0.502964649  | 0.183621108 | 2.754137877  | 0.005884697 | 0.030791903 |
| CTAGE1        | 0.706601702 | -2.498257806 | 0.907207168 | -2.753789233 | 0.005890959 | 0.030808074 |
| RGFBP3        | 8943.682252 | 0.968879155  | 0.350746635 | 2.753780249  | 0.005891131 | 0.030808074 |
| BLOC13        | 755.9280027 | 0.270745496  | 0.09832699  | 2.753523601  | 0.005895752 | 0.030823493 |
| POLR3E        | 1303.727536 | -0.199434794 | 0.072436639 | -2.753230922 | 0.005901026 | 0.030842045 |
| PCLAF         | 127.7290221 | -0.697407039 | 0.253336372 | -2.753140952 | 0.005902648 | 0.030842045 |
| RBV63         | 389.2945508 | -0.547133673 | 0.19874446  | -2.752950563 | 0.005906081 | 0.03085124  |
| NRP1.5        | 1390.969286 | 0.231589038  | 0.084141268 | 2.752383502  | 0.005916319 | 0.030895961 |
| GABI          | 3158.357331 | -0.549255041 | 0.199570127 | -2.752190664 | 0.005919804 | 0.030905404 |
| EVSL          | 4503.382589 | -0.395579349 | 0.143749689 | -2.751862302 | 0.005925743 | 0.030927647 |
| TRM1          | 2822.933225 | 0.390327077  | 0.141849198 | 2.751704514  | 0.005928599 | 0.03093379  |
| GPH85         | 0.651585874 | -1.569165712 | 0.570315011 | -2.751401737 | 0.005934082 | 0.030953636 |
| SECL4.5       | 4068.293959 | -0.835349111 | 0.303647222 | -2.751051389 | 0.005940432 | 0.030977993 |
| RUFY2         | 2772.83437  | -0.502064415 | 0.187504583 | -2.750870179 | 0.005943719 | 0.030986366 |
| AL03430.1     | 90.5386504  | 2.62010891   | 0.95351749  | 2.750719294  | 0.005946447 | 0.030991813 |
| TBL LWR1      | 3376.26114  | -0.25336357  | 0.09211509  | -2.750511023 | 0.005950239 | 0.030994051 |
| RGFZR         | 8949.048298 | 0.415058847  | 0.150898547 | 2.750568873  | 0.005949188 | 0.030994051 |
| LYL1          | 1124.142591 | 0.724139399  | 0.263336105 | 2.749887507  | 0.005951937 | 0.031046206 |
| PHR           | 2619.765376 | -0.354747206 | 0.129020272 | -2.749546269 | 0.005967784 | 0.031059103 |
| C6or52        | 98.02877854 | 0.659058007  | 0.239687046 | 2.749630474  | 0.005966251 | 0.031059103 |
| SDHF1         | 1270.995477 | 0.433390357  | 0.164981848 | 2.749334933  | 0.005971633 | 0.031070364 |
| PTPRM         | 1661.981099 | -0.559669606 | 0.203693808 | -2.748952448 | 0.005978606 | 0.031097863 |
| UB2EM         | 5289.608408 | 0.369740994  | 0.134554352 | 2.747893247  | 0.005997953 | 0.031189696 |
| CBFAT2        | 1702.916904 | -0.266302315 | 0.096930074 | -2.747365235 | 0.006007619 | 0.03121966  |
| UBE4B         | 2830.785259 | -0.278414061 | 0.101340941 | -2.747300099 | 0.006008798 | 0.03121966  |
| CD9B          | 63.86911729 | 0.878646031  | 0.319814171 | 2.747364283  | 0.006007637 | 0.03121966  |
| SERPIN1       | 3188.2312   | 0.513496035  | 0.186965399 | 2.746476286  | 0.006023924 | 0.031280613 |
| SELL          | 890.415882  | 0.784405342  | 0.285598748 | 2.746529336  | 0.00602295  | 0.031280613 |
| ZNF107        | 555.052778  | -0.58374735  | 0.212660809 | -2.746242455 | 0.00602823  | 0.031294101 |
| H6F5          | 4.046854272 | -1.03071649  | 0.375359507 | -2.746010649 | 0.006032481 | 0.031302973 |
| ABC42         | 62918.19697 | -0.635780633 | 0.231532706 | -2.745964686 | 0.006033326 | 0.031302973 |
| RBV66         | 2225.169498 | -0.247691364 | 0.090217984 | -2.745476605 | 0.006042308 | 0.031325991 |
| RECK          | 520.4260165 | -0.334597888 | 0.121874038 | -2.745440225 | 0.006042978 | 0.031325991 |
| SLC25A1       | 3686.649479 | 0.389918753  | 0.142015901 | 2.745599753  | 0.006040049 | 0.031325991 |
| CYP26C1       | 12.4825832  | -0.926258719 | 0.337430199 | -2.745038    | 0.006050389 | 0.031347377 |
| RAET1G        | 20.65469499 | 0.848906145  | 0.309245776 | 2.745058563  | 0.00604951  | 0.031347377 |
| ITFG.2        | 1037.702649 | -0.195732706 | 0.071333971 | -2.743954998 | 0.006070386 | 0.031442142 |
| SGCA          | 58.51299065 | 0.940124678  | 0.342684023 | 2.743415531  | 0.006080369 | 0.031485001 |
| ZNF89         | 713.3764107 | -0.344340332 | 0.125553914 | -2.742569473 | 0.006090555 | 0.03155736  |
| EIF3G         | 8316.310299 | 0.45130849   | 0.164588495 | 2.742041543  | 0.006105862 | 0.03159925  |
| GYG1          | 2615.027548 | 0.288596551  | 0.105245967 | 2.741764444  | 0.006111015 | 0.031617039 |
| NSANTD3-TMFF1 | 972.983058  | -0.59822969  | 0.218200021 | -2.74165734  | 0.006113008 | 0.031618472 |
| TMEH62        | 938.7515409 | 0.229527366  | 0.08173961  | 2.740961319  | 0.006125897 | 0.031676252 |
| OLM           | 24.2599772  | 0.97626605   | 0.356198148 | 2.740794876  | 0.006129076 | 0.031683792 |
| FTSD          | 2375.810174 | 0.306477613  | 0.111829039 | 2.740590656  | 0.006132886 | 0.031694604 |
| L3MYPH        | 810.1775983 | -0.389993304 | 0.142311624 | -2.740411784 | 0.006136113 | 0.031702391 |
| HSD17B4       | 7281.313575 | -0.366472911 | 0.133744269 | -2.740101781 | 0.006142016 | 0.031708636 |
| ZNF721        | 1120.58406  | -0.396938936 | 0.144863834 | -2.74008305  | 0.006142366 | 0.031708636 |
| SPOCK2        | 14865.00319 | 0.576455438  | 0.210379302 | 2.740076765  | 0.006142484 | 0.031708636 |
| MDR38         | 2303.010174 | -0.626173711 | 0.22853705  | -2.739922085 | 0.006145375 | 0.031714679 |
| ABHD8         | 493.0900114 | -0.30755383  | 0.112265629 | -2.739541485 | 0.006153006 | 0.031727405 |
| MGAT2         | 1096.515729 | 0.453826209  | 0.165657558 | 2.739544791  | 0.006152434 | 0.031727405 |
| HST1HHE       | 100.9830452 | 0.768227476  | 0.280413671 | 2.73962205   | 0.006150987 | 0.031727405 |
| CEP295        | 627.0215009 | -0.359270066 | 0.131183154 | -2.738690569 | 0.00616844  | 0.031798092 |
| BAGAL3        | 1281.31338  | 0.296281456  | 0.108199893 | 2.738278626  | 0.006176173 | 0.031832905 |
| LRR63         | 723.244077  | -0.931510922 | 0.340229097 | -2.737893179 | 0.006183416 | 0.03185747  |
| PREX2         | 1630.374959 | -0.64738601  | 0.234764981 | -2.737784905 | 0.006185453 | 0.031859052 |
| RGMB          | 1125.36652  | 0.314509529  | 0.114892877 | 2.737415501  | 0.006192403 | 0.031885942 |
| TNNC2         | 73.800153   | 0.756379444  | 0.27634668  | 2.737067193  | 0.006198963 | 0.031901896 |
| RPS5          | 17291.18653 | 0.443254033  | 0.161938823 | 2.73715279   | 0.006197351 | 0.031901896 |
| EZH1          | 3688.724721 | -0.26585128  | 0.097146967 | -2.736588565 | 0.006207988 | 0.031939423 |
| EMC10         | 11514.81029 | 0.361108229  | 0.132000725 | 2.736633381  | 0.006225657 | 0.032021389 |
| DENND1C       | 732.9361524 | 0.645748821  | 0.236121999 | 2.734810067  | 0.006241628 | 0.032094576 |
| IL4R          | 2027.788899 | 0.57916347   | 0.211855765 | 2.733763082  | 0.006261508 | 0.032187819 |
| DTHD1         | 36.74511086 | -1.141674545 | 0.417650366 | -2.733565295 | 0.00626527  | 0.032198176 |
| CIFR          | 44.94853151 | -1.162144172 | 0.425267094 | -2.732739467 | 0.006280999 | 0.032270013 |
| RSRC1         | 892.7708336 | -0.458807831 | 0.167956178 | -2.731711548 | 0.006300628 | 0.032361836 |
| DNAC15        | 2849.742124 | -0.358385609 | 0.131225877 | -2.731058979 | 0.006313117 | 0.032416951 |
| ELOVL5        | 6100.470743 | -0.370536614 | 0.135673372 | -2.730945711 | 0.006315287 | 0.032419062 |
| PREZ2         | 1907.9699   | -0.859274601 | 0.314808882 | -2.729511935 | 0.006342815 | 0.032546672 |
| CL46P17B      | 7.705526209 | 0.78959992   | 0.28831798  | 2.729487348  | 0.006343288 | 0.032546672 |
| NRP4.40       | 1946.900537 | 0.360572479  | 0.132145248 | 2.72860723   | 0.006360241 | 0.          |

|                |             |              |             |              |             |             |
|----------------|-------------|--------------|-------------|--------------|-------------|-------------|
| NR09           | 758.238404  | 0.36593707   | 0.09747688  | 2.728218639  | 0.006367779 | 0.032640424 |
| ANKR02         | 530.162524  | 0.35985002   | 0.13192275  | 2.727977143  | 0.006372398 | 0.032648577 |
| SERP1          | 5730.199418 | 0.230109426  | 0.084321276 | 2.727341286  | 0.006384658 | 0.032702295 |
| GPR19          | 408.3471287 | 0.413153022  | 0.151495899 | 2.727156483  | 0.006388274 | 0.032711724 |
| MWP2           | 2582.816373 | -0.637420011 | 0.233784854 | -2.726523985 | 0.00640053  | 0.032752088 |
| NEO1           | 6003.405543 | -0.433493099 | 0.158999341 | -2.726382986 | 0.006403265 | 0.032752088 |
| CAV1           | 3232.566516 | 0.701355859  | 0.257247265 | 2.726388014  | 0.006403168 | 0.032752088 |
| PSM1           | 3567.065679 | 0.23833554   | 0.087416024 | 2.726451394  | 0.006401938 | 0.032752088 |
| SLC4A1P        | 1942.072751 | 0.171822662  | 0.063029531 | 2.726055988  | 0.006409418 | 0.032774464 |
| DRS9           | 252.6353236 | 0.845622331  | 0.310247779 | 2.726354541  | 0.006417785 | 0.032808142 |
| TGFA           | 1141.654358 | -0.503887242 | 0.184890417 | -2.725329142 | 0.006423741 | 0.032829487 |
| UTP14A         | 756.3334839 | 0.252806832  | 0.092765635 | 2.725214858  | 0.006425965 | 0.032831749 |
| HTF1           | 582.7687943 | -0.470187112 | 0.172581087 | -2.724441701 | 0.00644103  | 0.032899596 |
| NDUFB10        | 4829.372149 | 0.46397151   | 0.170323566 | 2.724059398  | 0.006448491 | 0.032928578 |
| FNBP4          | 2644.081345 | 0.32581098   | 0.119661782 | 2.72395451   | 0.006450501 | 0.032929719 |
| CSF1R          | 7547.816802 | -0.750764501 | 0.275651599 | -2.723599299 | 0.006454748 | 0.032950338 |
| ATAD2B         | 457.6409493 | -0.452662463 | 0.166207977 | -2.723470151 | 0.006460005 | 0.032950338 |
| CDC3L1         | 2468.23793  | -1.103187554 | 0.405068954 | -2.72345015  | 0.006460396 | 0.032950338 |
| RAD54L         | 139.3690344 | -0.834615564 | 0.306462691 | -2.723383917 | 0.006461692 | 0.032950338 |
| ZNFX15         | 35.88820064 | 0.27814601   | 0.267328655 | 2.722545154  | 0.006478098 | 0.032924862 |
| RETREG 2       | 7010.936899 | 0.219350041  | 0.080633724 | 2.720388134  | 0.006520529 | 0.033231977 |
| TMSF19-1CTEX1D | 6.85118066  | 1.715106038  | 0.630643842 | 2.720042483  | 0.006527353 | 0.033257558 |
| PHL4D          | 4063.767157 | 0.754215401  | 0.277301331 | 2.719840536  | 0.00653134  | 0.033268677 |
| MZF1           | 1968.142478 | -0.369203259 | 0.098887046 | -2.719580702 | 0.006536474 | 0.033282107 |
| CRYBG 1        | 468.4391886 | 0.804509706  | 0.295827364 | 2.719524309  | 0.006537589 | 0.033282107 |
| PQDK1          | 32.0003779  | -0.661060378 | 0.243117206 | -2.719101583 | 0.00654595  | 0.033305437 |
| PCP1B          | 618.8504159 | 0.271311859  | 0.099783011 | 2.719018586  | 0.006547953 | 0.033305437 |
| CFRS5          | 2795.483542 | 0.24709147   | 0.090873902 | 2.719008660  | 0.0065468   | 0.033305437 |
| CCDC69         | 859.4743663 | 0.511333903  | 0.191767123 | 2.718573883  | 0.006556401 | 0.033331839 |
| EMC7           | 3500.372252 | 0.285015943  | 0.104837437 | 2.718646602  | 0.00655496  | 0.033331839 |
| TRIM1          | 5.474834282 | 1.457201218  | 0.586073996 | 2.718278305  | 0.006562262 | 0.033352422 |
| ABCA10         | 128.9996799 | -0.427136359 | 0.157179272 | -2.717510738 | 0.006577502 | 0.033420674 |
| NAVC1          | 8.554618212 | -1.101428506 | 0.405392607 | -2.716937821 | 0.006588898 | 0.033469352 |
| RPS9           | 10733.4278  | 0.7018463    | 0.25840794  | 2.716039992  | 0.006606794 | 0.033551006 |
| CDorf194       | 3340.858391 | -0.425641169 | 0.15676234  | -2.715200406 | 0.006623568 | 0.033626922 |
| SNX12          | 2405.680461 | 0.135482879  | 0.049900961 | 2.715035456  | 0.006626868 | 0.033634441 |
| SLR2           | 740.1136034 | 0.987888859  | 0.363883808 | 2.714846983  | 0.00663064  | 0.03364429  |
| KLH4           | 1152.458747 | -0.779822449 | 0.287555795 | -2.714731829 | 0.006632946 | 0.033646726 |
| CITA           | 1787.779035 | -0.607156516 | 0.223694022 | -2.714227728 | 0.006643048 | 0.03368871  |
| ZNFA29         | 435.7698681 | -0.498183919 | 0.18357215  | -2.713831155 | 0.006651006 | 0.033719759 |
| CDK13          | 2078.669613 | -0.254360496 | 0.093748516 | -2.713221564 | 0.006663254 | 0.033763299 |
| CHMP6          | 1715.117131 | 0.412952743  | 0.152197722 | 2.713264929  | 0.006662382 | 0.033763299 |
| RRM15          | 385.963376  | 0.378026302  | 0.124433229 | 2.713122577  | 0.006665245 | 0.0337641   |
| NDAB           | 330.132274  | 0.280637195  | 0.10345077  | 2.712760208  | 0.006672525 | 0.033791891 |
| Chor40B        | 1051.281492 | 0.28483214   | 0.087928358 | 2.712244594  | 0.006682926 | 0.033825774 |
| PLEKHF1        | 1155.537484 | 0.46741581   | 0.17233499  | 2.712251355  | 0.00668279  | 0.033825774 |
| DMC1           | 31.79534583 | -0.619898479 | 0.228568888 | -2.712085986 | 0.006686125 | 0.033832672 |
| NIPAL1         | 34.44497662 | 0.858150948  | 0.316490889 | 2.711455455  | 0.006698854 | 0.03388778  |
| ANKRD36        | 815.0738518 | -0.625372927 | 0.230672901 | -2.711081034 | 0.006706423 | 0.033892489 |
| ENY2           | 2452.529304 | 0.265414562  | 0.097801182 | 2.711045546  | 0.006707141 | 0.033892489 |
| NBRV4          | 8725.372188 | 0.259916167  | 0.095869947 | 2.711132897  | 0.006705375 | 0.033892489 |
| KIF3B          | 4200.931436 | 0.339970418  | 0.088512262 | 2.71154518   | 0.006704937 | 0.033892489 |
| NAT10          | 1902.552176 | 0.176792625  | 0.065221598 | 2.710645395  | 0.00671524  | 0.033914814 |
| HDHC5          | 1469.464977 | 0.369895428  | 0.13612209  | 2.71069471   | 0.006714241 | 0.033914814 |
| PPP1R10        | 3384.30026  | -0.252414459 | 0.093130485 | -2.710331202 | 0.006711605 | 0.033929855 |
| PFYF8          | 1728.612913 | 0.602659901  | 0.222357746 | 2.710166645  | 0.0067219   | 0.033929855 |
| FA2H           | 5699.692607 | -0.758430326 | 0.279850778 | -2.710124046 | 0.006732805 | 0.033930977 |
| PSM2           | 4936.147792 | 0.245345629  | 0.090527772 | 2.710447641  | 0.006725326 | 0.033930977 |
| PRODH          | 1645.979548 | -0.737499279 | 0.22231202  | -2.707699542 | 0.006775132 | 0.034110477 |
| GPATCH         | 2624.636317 | -0.372038823 | 0.137429714 | -2.707120697 | 0.006786958 | 0.034220751 |
| CDKAL1         | 545.8103154 | -0.428414196 | 0.15827441  | -2.706781195 | 0.006793902 | 0.034238537 |
| UBXN1          | 5817.584314 | 0.463070583  | 0.171084613 | 2.7066758    | 0.006796059 | 0.034238537 |
| ABC9           | 1338.070654 | 0.350825993  | 0.129616372 | 2.706676339  | 0.006796044 | 0.034238537 |
| RYS3           | 2325.311399 | -0.763857412 | 0.282240718 | -2.706404015 | 0.006801624 | 0.034244959 |
| CATP           | 107.9265609 | 0.745648914  | 0.275519169 | 2.706341332  | 0.006802908 | 0.034244959 |
| CCT5           | 5929.260676 | 0.349281168  | 0.129052736 | 2.706499517  | 0.006799668 | 0.034244959 |
| PPP1R2         | 2002.115604 | 0.257542458  | 0.095170748 | 2.706109416  | 0.006807661 | 0.034295271 |
| CL9orf71       | 57.34532636 | -0.750421398 | 0.277379289 | -2.705398088 | 0.006822758 | 0.034297974 |
| METTL15        | 404.0256726 | -0.357080312 | 0.131993009 | -2.70531776  | 0.006823908 | 0.034297974 |
| PDI1P1         | 1287.022251 | -0.362528111 | 0.134005925 | -2.705314039 | 0.006823985 | 0.034297974 |
| RIC3           | 1053.287302 | 0.464162399  | 0.171576306 | 2.705283784  | 0.006824668 | 0.034297974 |
| AGPAT1         | 6616.873438 | 0.242701327  | 0.089710771 | 2.705375562  | 0.006822721 | 0.034297974 |
| CCDC3          | 5.66824842  | 1.624898598  | 0.600766641 | 2.70470843   | 0.006836437 | 0.0343387   |
| C3orf52        | 52.07666448 | 1.038212553  | 0.383846359 | 2.704760719  | 0.006835361 | 0.0343387   |
| MVL4           | 27.53471173 | 1.076646901  | 0.398106142 | 2.704421729  | 0.006842339 | 0.034358981 |
| PPP1R1C        | 191.6880801 | -0.715634648 | 0.264676309 | -2.703810748 | 0.006854932 | 0.034412841 |
| DPYS15         | 8215.198246 | -0.66663763  | 0.246583155 | -2.703500289 | 0.006861339 | 0.034435625 |
| TRIM28         | 10379.69797 | 0.435267926  | 0.161023541 | 2.703132255  | 0.006868941 | 0.034464392 |
| NR6A1          | 201.4077307 | -0.435660761 | 0.161213537 | -2.702383249 | 0.006884436 | 0.034532734 |
| ARC            | 3465.841963 | 0.835156797  | 0.309140279 | 2.701546363  | 0.006901786 | 0.034600927 |
| PRPF19         | 5147.185666 | 0.297934888  | 0.110281223 | 2.701592155  | 0.006900835 | 0.034600927 |
| ZNFS96         | 398.2241236 | -0.254010982 | 0.094050887 | -2.70078241  | 0.006917658 | 0.034651427 |
| CN0T11         | 1463.299393 | 0.276694925  | 0.102453054 | 2.700699626  | 0.00691938  | 0.034651427 |
| MEI1           | 102.409785  | 0.673411269  | 0.249345242 | 2.700718339  | 0.006918991 | 0.034651427 |
| SOCS3          | 3133.421019 | 0.88000831   | 0.325809488 | 2.700967516  | 0.006913809 | 0.034651427 |
| NR6G           | 3570.096679 | 0.38124246   | 0.141193001 | 2.700511256  | 0.00693096  | 0.034699168 |
| NATN2          | 8970.374778 | -0.5821076   | 0.21602107  | -2.699786457 | 0.0069384   | 0.034712467 |
| FAM122C        | 383.1246644 | -0.284466702 | 0.105367651 | -2.699753413 | 0.006939089 | 0.034712467 |
| XPNPEP3        | 691.765826  | -0.254511889 | 0.094272296 | -2.699752727 | 0.006939103 | 0.034712467 |
| MWP3K13        | 1718.215151 | -0.194851375 | 0.07217934  | -2.699544998 | 0.006943437 | 0.03472472  |
| ACD07040.2     | 48.16869115 | 0.721045955  | 0.267116481 | 2.699360262  | 0.006947109 | 0.034733663 |
| FCERIA         | 132.0325563 | 1.322190381  | 0.489806044 | 2.698950056  | 0.006955861 | 0.034767988 |
| ATP5F1         | 5282.636366 | 0.341350005  | 0.126479966 | 2.698846442  | 0.006958027 | 0.034769384 |
| ARPC4          | 4700.856343 | 0.179820808  | 0.066638642 | 2.698446458  | 0.006963994 | 0.034801757 |
| FEZ1           | 28766.40691 | -0.521621627 | 0.193315453 | -2.698292443 | 0.006965618 | 0.034804283 |
| KRT1           | 1210.645299 | -0.37433579  | 0.138427239 | -2.697688531 | 0.006982274 | 0.034862183 |
| RPN2           | 9193.932815 | 0.363751954  | 0.134859649 | 2.697263086  | 0.006991201 | 0.034897304 |
| RPL41          | 56119.90501 | 0.401872421  | 0.149014225 | 2.696872873  | 0.006993999 | 0.034928762 |
| NTRF14         | 1907.462166 | 0.362359393  | 0.09724859  | 2.695787118  | 0.007001798 | 0.034931378 |
| SHP2           | 560.4607422 | -0.461134701 | 0.171008005 | -2.695642702 | 0.007005241 | 0.034944482 |
| GMPF1L1        | 3063.818483 | -0.172285    | 0.062902378 | -2.696128365 | 0.007012063 | 0.034978515 |
| INTS2          | 737.5603241 | -0.37174828  | 0.137887246 | -2.696030979 | 0.007011714 | 0.034979279 |
| KLRC1          | 13.50999922 | -0.917676747 | 0.340409888 | -2.695799346 | 0.007021995 | 0.034987128 |
| ADAMTS13       | 810.5159856 | -0.337926025 | 0.125353892 | -2.695776086 | 0.007022486 | 0.034987128 |
| SHBP1          | 2924.240668 | 0.453277726  | 0.168155994 | 2.695578757  | 0.007026646 | 0.034989804 |
| DERL1          | 2363.424648 | 0.214337321  | 0.079512914 | 2.695629068  | 0.007025586 | 0.034989804 |
| PIW1L3         | 3.348115973 | -1.11033469  | 0.412255926 | -2.695009093 | 0.007038671 | 0.035039349 |
| VPS3L          | 3413.469045 | -0.211406301 | 0.078459935 | -2.694449104 | 0.007050609 | 0.035083371 |
| AQPI1          | 28725.04209 | -1.060086468 | 0.393439079 | -2.694410709 | 0.007051322 | 0.035083371 |
| SRPK3          | 864.8897149 | -0.550982925 | 0.204500193 | -2.694290484 | 0.007053865 | 0.035086557 |
| CL10orf4       | 11.0904029  | 1.127178505  | 0.418414448 | 2.693928251  | 0.007061536 | 0.035115233 |
| LYPD1          | 1947.52445  | 0.585774122  | 0.217497645 | 2.693243543  | 0.007070566 | 0.035177943 |
| SGPC3          | 5592.716791 | 0.39677449   | 0.147333517 | 2.693035801  | 0.007080467 | 0.035190377 |
| GLI2           | 6854.174772 | -0.518745029 | 0.192635494 |              |             |             |

|            |             |              |             |              |             |             |
|------------|-------------|--------------|-------------|--------------|-------------|-------------|
| TONDC12    | 2800.188801 | 0.210716239  | 0.078258846 | 2.692554881  | 0.007090688 | 0.035203199 |
| CARN51     | 26340.72850 | -0.822975442 | 0.305704183 | -2.692064713 | 0.007101117 | 0.035245482 |
| BIGAT1     | 14151.47992 | -0.5015663   | 0.186351672 | -2.691504155 | 0.007113061 | 0.035295263 |
| PNKD       | 4658.67437  | 0.367676437  | 0.136673613 | 2.690844478  | 0.007127141 | 0.035355608 |
| SP2        | 1435.340398 | -0.278056716 | 0.103340995 | -2.690673126 | 0.007130803 | 0.035364252 |
| UBASH9B    | 644.8778825 | 0.577771113  | 0.214760677 | 2.690302154  | 0.007138735 | 0.035394067 |
| SETD6      | 3573.724571 | -0.38950996  | 0.148307239 | -2.690305066 | 0.007144549 | 0.035413364 |
| PPP2R2B    | 5190.0312   | -0.581122438 | 0.216052154 | -2.689732192 | 0.007150938 | 0.035429523 |
| HSBP1L1    | 657.5529443 | 0.362577946  | 0.134802435 | 2.689686792  | 0.007151654 | 0.035429523 |
| MTF        | 823.5461245 | -0.497745526 | 0.185134211 | -2.688565887 | 0.007157967 | 0.035540415 |
| DGKD       | 2551.31114  | -0.314803068 | 0.117116702 | -2.687943425 | 0.007189358 | 0.03558761  |
| TDG        | 865.9906139 | 0.400372863  | 0.1489483   | 2.687998877  | 0.007188164 | 0.03558761  |
| USP30      | 1458.48204  | -0.296244588 | 0.110220966 | -2.687740014 | 0.007193736 | 0.035599715 |
| TLL19      | 563.5954102 | -0.577850404 | 0.21501134  | -2.687534922 | 0.007198157 | 0.035612039 |
| C3orf3     | 289.1375646 | 0.3948014    | 0.146915048 | 2.687275777  | 0.007203723 | 0.03563001  |
| DYNLL12    | 19880.18972 | -0.433887011 | 0.161467081 | -2.687154605 | 0.007206359 | 0.035633482 |
| NME4       | 8766.559144 | 0.288671694  | 0.107432024 | 2.687017182  | 0.007209244 | 0.035638584 |
| ZZEF1      | 3242.474066 | -0.222729565 | 0.082915547 | -2.686250137 | 0.007226887 | 0.03571574  |
| CALCR      | 6.473377581 | -1.322189765 | 0.492302537 | -2.685726085 | 0.007232739 | 0.035757939 |
| ARAP2      | 3651.835301 | -0.504424314 | 0.187825334 | -2.685603182 | 0.007239902 | 0.035760962 |
| BIRC6      | 3144.943129 | -0.502528695 | 0.187133097 | -2.685407892 | 0.007244134 | 0.035772278 |
| RBM3       | 2468.727224 | 0.17835496   | 0.066421005 | 2.685217196  | 0.007248269 | 0.035783108 |
| RFTN2      | 2228.233143 | -0.54899404  | 0.204494845 | -2.684635111 | 0.007260903 | 0.035835881 |
| POLI       | 1175.384427 | -0.333665637 | 0.124314311 | -2.684048491 | 0.007273656 | 0.03587493  |
| SH2D4      | 30.39027405 | -0.922587415 | 0.343739164 | -2.683975273 | 0.007275249 | 0.03587493  |
| EEF2KMT    | 586.0631972 | 0.330937248  | 0.123308118 | 2.683833668  | 0.007278548 | 0.03587493  |
| CP5F3      | 1662.555419 | 0.323593478  | 0.12057085  | 2.683845043  | 0.007278083 | 0.03587493  |
| VDAC1      | 7596.946096 | 0.281553848  | 0.10490507  | 2.68381708   | 0.007277067 | 0.03587493  |
| ZNF564     | 324.9902689 | 0.34808337   | 0.139715781 | 2.683423383  | 0.007287071 | 0.035907334 |
| ILIR1      | 1202.252347 | 0.694097328  | 0.258715592 | 2.682858516  | 0.007295586 | 0.03595939  |
| MBX1       | 1128.434771 | 0.594242424  | 0.221548738 | 2.682589572  | 0.007305459 | 0.0359787   |
| LRP1B      | 883.8714631 | -0.872725345 | 0.325346715 | -2.682447076 | 0.007308571 | 0.035984415 |
| MRPL22     | 1005.767481 | 0.279954138  | 0.104374413 | 2.682210425  | 0.007313744 | 0.036000264 |
| C15orf62   | 25.13500086 | 0.925076199  | 0.344925738 | 2.681957583  | 0.007319274 | 0.036017864 |
| AS3MT      | 440.9414918 | 0.364497309  | 0.135916922 | 2.681765427  | 0.007323479 | 0.036028937 |
| MTRF1      | 331.7878898 | -0.30475202  | 0.113660846 | -2.681240115 | 0.007334986 | 0.036075918 |
| P2RY13     | 822.2065407 | -0.698588496 | 0.260584379 | -2.680853314 | 0.00734347  | 0.036105331 |
| TONRD3     | 281.0089058 | 0.306177168  | 0.114211595 | 2.680788828  | 0.007344885 | 0.036105331 |
| PWWP2A     | 857.946683  | -0.286503588 | 0.106885245 | -2.680480906 | 0.007351646 | 0.036106921 |
| YPEL2      | 1582.105843 | -0.422598577 | 0.157656559 | -2.680465554 | 0.007351961 | 0.036106921 |
| MTURN      | 100050.9799 | -0.756297631 | 0.282156688 | -2.680417197 | 0.007353045 | 0.036106921 |
| TRAM2      | 2342.737662 | 0.395993811  | 0.147728354 | 2.680553873  | 0.007350043 | 0.036106921 |
| PSMA7      | 5946.356768 | 0.298571421  | 0.111401576 | 2.680136511  | 0.007359214 | 0.036117586 |
| DGT1       | 6463.249089 | -0.424082179 | 0.158285822 | -2.679217714 | 0.007379444 | 0.036213798 |
| CCDC88A    | 8740.79173  | -0.498189701 | 0.18597226  | -2.678824363 | 0.007388114 | 0.036213798 |
| PLP1       | 2771.901488 | 0.699845263  | 0.261252895 | 2.67880386   | 0.007388566 | 0.036213798 |
| OR11G2     | 8.16703615  | 0.904728813  | 0.337715936 | 2.678963932  | 0.007385035 | 0.036213798 |
| PUSL1      | 835.4580427 | 0.330664582  | 0.145895845 | 2.679065889  | 0.007382786 | 0.036213798 |
| RTP4       | 552.5219042 | 0.664080701  | 0.247872118 | 2.679125589  | 0.00738147  | 0.036213798 |
| BA55F4     | 10923.00686 | -0.406448546 | 0.151739641 | -2.678991723 | 0.007393248 | 0.036227112 |
| GIMMP8     | 532.9355626 | -0.424041134 | 0.158395624 | -2.677101323 | 0.007426217 | 0.03637899  |
| ARG        | 390.4659147 | 0.336933681  | 0.125883496 | 2.676551673  | 0.007438009 | 0.036429032 |
| INKA2      | 1469.122368 | 0.669773     | 0.250306446 | 2.675874033  | 0.007453465 | 0.036483376 |
| SILC12A8   | 221.6985099 | 0.48867419   | 0.182622106 | 2.675876431  | 0.007453412 | 0.036483376 |
| COMMD10    | 450.2652731 | -0.547275901 | 0.204557745 | -2.675410321 | 0.007463784 | 0.036497017 |
| TMED1      | 1305.628456 | 0.37451647   | 0.1398986   | 2.675392816  | 0.007464174 | 0.036497017 |
| PNP1PEP1   | 2148.711103 | 0.187343626  | 0.069084359 | 2.675506771  | 0.007461637 | 0.036497017 |
| PNRC1      | 3548.68137  | 0.330950503  | 0.123677075 | 2.675557142  | 0.007466515 | 0.036497017 |
| TM6ID      | 93.7876462  | -0.742077758 | 0.277476114 | -2.674384281 | 0.007486661 | 0.036590117 |
| ZNF404     | 381.1955263 | -0.523960316 | 0.195919831 | -2.674380808 | 0.007487185 | 0.036590117 |
| CMT9B      | 3431.873843 | 0.520928749  | 0.194839268 | 2.673633273  | 0.007503446 | 0.036659861 |
| PPAL4G     | 38.80697024 | 0.771803728  | 0.28869303  | 2.673440811  | 0.007507752 | 0.036671182 |
| O'VCH      | 10.3399843  | -0.846432555 | 0.316638166 | -2.673185497 | 0.007513469 | 0.036689381 |
| GAPNL3     | 1065.555564 | -0.513229207 | 0.192020768 | -2.672779685 | 0.007522564 | 0.03672406  |
| SHB1       | 3949.878953 | -0.20976288  | 0.078485401 | -2.672635396 | 0.0075258   | 0.036730128 |
| C2orf88    | 1105.667792 | -0.462191148 | 0.17264109  | -2.672179513 | 0.007536032 | 0.036760597 |
| ZNF561     | 1607.885924 | 0.472119057  | 0.176679312 | 2.672182262  | 0.00753597  | 0.036760597 |
| P2RX7      | 2787.169479 | -0.501266902 | 0.187599505 | -2.672056744 | 0.00753879  | 0.036764318 |
| PPP1R16A   | 2795.945029 | 0.331429111  | 0.124062746 | 2.671463506  | 0.007551226 | 0.036819612 |
| ARPC3      | 9248.765881 | 0.340174542  | 0.127347964 | 2.671220880  | 0.00755759  | 0.036836504 |
| BTU1B2     | 101.7130463 | 0.897385445  | 0.186239918 | 2.670138781  | 0.00758199  | 0.036945663 |
| FAM22A     | 3113.216463 | -0.605237962 | 0.226728491 | -2.669433975 | 0.007597799 | 0.037012909 |
| ULK2       | 2980.38809  | -0.499454681 | 0.187108093 | -2.669337671 | 0.0076001   | 0.037014335 |
| AUGFV1     | 1914.29792  | -0.78603533  | 0.294676952 | -2.667447609 | 0.00764298  | 0.037203526 |
| POGFR1     | 4885.140762 | -1.26493888  | 0.474213224 | -2.667447459 | 0.007642984 | 0.037203526 |
| AL354822.1 | 117.1688942 | -0.706739228 | 0.264964689 | -2.667295894 | 0.007646432 | 0.037210481 |
| GNAO1      | 13841.99043 | -0.578122678 | 0.216758777 | -2.667124648 | 0.007650329 | 0.037219619 |
| SETDB1     | 1577.1093   | -0.201237607 | 0.075461371 | -2.666763204 | 0.007658561 | 0.037249833 |
| RSRC2      | 2557.053497 | -0.18560961  | 0.069604762 | -2.666623202 | 0.007661772 | 0.037252565 |
| POSTN      | 289.228372  | -1.168599239 | 0.438242048 | -2.666561195 | 0.007663165 | 0.037252565 |
| SHD09      | 1390.388298 | -0.522384566 | 0.195938872 | -2.666058855 | 0.007674626 | 0.037298438 |
| GID8       | 2517.552277 | 0.232674127  | 0.087289159 | 2.665558225  | 0.007686117 | 0.037344437 |
| KATNAL2    | 378.362688  | -0.481952167 | 0.18086585  | -2.664694128 | 0.007705838 | 0.037403895 |
| TOMM2L     | 7402.827901 | 0.328503609  | 0.123792624 | 2.664427209  | 0.007712007 | 0.037405788 |
| POLAI      | 675.6659269 | -0.495813765 | 0.186098988 | -2.664247528 | 0.007716078 | 0.037460371 |
| MHB        | 343.9559742 | -0.48223723  | 0.181015208 | -2.664070321 | 0.007720142 | 0.037465568 |
| TRIMD      | 2526238088  | 2.412748959  | 0.907867922 | 2.664023684  | 0.007721213 | 0.037465568 |
| GPX4       | 20485.00103 | 0.424839044  | 0.194888811 | 2.663754534  | 0.007727393 | 0.037485686 |
| ENOX2      | 623.7742012 | -0.400692778 | 0.150432503 | -2.663605079 | 0.007730826 | 0.037492473 |
| AKR7A2     | 2918.522513 | 0.322407639  | 0.121049556 | 2.663514332  | 0.007732912 | 0.037492723 |
| GALK2      | 668.1633442 | -0.335935067 | 0.126141017 | -2.663170758 | 0.007740812 | 0.037521154 |
| PAPS1      | 3775.753091 | -0.33822888  | 0.125367544 | -2.662753677 | 0.007750413 | 0.037557811 |
| RPS6KA5    | 931.43606   | -0.43658685  | 0.163970951 | -2.662586561 | 0.007754262 | 0.037566588 |
| PN2        | 1422.980554 | -0.372852837 | 0.140042753 | -2.662421495 | 0.007758066 | 0.037575139 |
| TNR6GA     | 3574.280978 | -0.330866577 | 0.124284883 | -2.662163478 | 0.007764016 | 0.037594076 |
| SPDY16     | 42.72365002 | -0.622394962 | 0.233827351 | -2.661771429 | 0.007773064 | 0.03762302  |
| MIDI1P     | 8552.011546 | -0.401597498 | 0.151040048 | -2.661529114 | 0.007778861 | 0.03762302  |
| TCTE1XD1   | 334.8476672 | -0.726868141 | 0.273108544 | -2.661462471 | 0.007780201 | 0.03762302  |
| NDI1C1     | 3503.709768 | 0.208205317  | 0.078214549 | 2.661636538  | 0.00777618  | 0.03762302  |
| NAI2013    | 4282.970208 | 0.325797466  | 0.122401307 | 2.661715583  | 0.007774354 | 0.03762302  |
| UNC5L      | 150.239677  | -0.51516451  | 0.193654854 | -2.661004573 | 0.007797079 | 0.037654463 |
| TAF10      | 4949.145647 | 0.421690422  | 0.158466848 | 2.661016945  | 0.007790504 | 0.037654463 |
| SETD3      | 3400.493174 | -0.254249    | 0.095656802 | -2.660460065 | 0.007803398 | 0.037695629 |
| PLBQ2      | 4776.687324 | 0.266667647  | 0.100231096 | 2.660528111  | 0.007801821 | 0.037695629 |
| RAB11FP5   | 2192.60026  | 0.493367899  | 0.185165151 | 2.659428439  | 0.007827336 | 0.037791451 |
| ARL4A      | 1191.44367  | 0.427857052  | 0.160878109 | 2.659510707  | 0.007825424 | 0.037791451 |
| RDI16      | 83.37483065 | -0.454383516 | 0.170877316 | -2.659121333 | 0.007834474 | 0.037806108 |
| RG512      | 3976.34352  | 0.297491962  | 0.111874913 | 2.659148272  | 0.007833848 | 0.037806108 |
| GPR35      | 253.4075665 | 0.441020643  | 0.165858227 | 2.659021807  | 0.007836789 | 0.037807378 |
| BCL7B      | 2881.676709 | 0.247138997  | 0.092953935 | 2.658725491  | 0.007843684 | 0.03783074  |
| AGPAT5     | 2620.667617 | 0.29000341   | 0.109437888 | 2.658136813  | 0.007857399 | 0.037888971 |
| ASB13      | 1731.960656 | 0.28827553   | 0.108464908 | 2.65778699   | 0.007865559 | 0.037916397 |
| GSTR4      | 2236.890821 | 0.365108854  | 0.137384643 | 2.657573983  | 0.007876511 | 0.037930445 |
| ZNF594     | 473.008904  | -0.405847102 | 0.152719699 | -2.657464035 | 0.00787     |             |



|             |             |              |             |              |             |             |
|-------------|-------------|--------------|-------------|--------------|-------------|-------------|
| PDW1        | 3443.591510 | 0.345496116  | 0.130044747 | 2.656747949  | 0.007898841 | 0.037987184 |
| CCDC160     | 121.4044079 | -0.558074431 | 0.210076614 | -2.656528119 | 0.007894987 | 0.037998619 |
| ETBP3       | 13828.71092 | 0.38548977   | 0.145149926 | 2.655804114  | 0.007911966 | 0.038070348 |
| ZNF347      | 607.2516028 | -0.310405773 | 0.116883124 | -2.65568913  | 0.007914654 | 0.038070992 |
| NME6        | 916.8091563 | 0.22575792   | 0.085011305 | 2.655623241  | 0.007916221 | 0.038070992 |
| CLOR54      | 275.095145  | -0.475676201 | 0.179133133 | -2.655433936 | 0.007920645 | 0.038075391 |
| FAIM        | 736.7770142 | -0.246668168 | 0.092892777 | -2.655407388 | 0.007921268 | 0.038075391 |
| CLND1       | 37127.15429 | -0.674128422 | 0.253939965 | -2.654676357 | 0.007938453 | 0.0381381   |
| FLNL1       | 487.9420391 | 0.64047214   | 0.241255544 | 2.654745795  | 0.007936819 | 0.0381381   |
| KLHL35      | 327.3698551 | 0.700250081  | 0.263825091 | 2.654220939  | 0.007949176 | 0.038179662 |
| GLCE        | 958.046733  | -0.278176187 | 0.104819424 | -2.653861059 | 0.007957659 | 0.038210445 |
| GPRES       | 1131.355352 | 0.429623564  | 0.161959798 | 2.652655593  | 0.007986131 | 0.038337174 |
| ACAP3       | 11493.62679 | -0.397816805 | 0.14997867  | -2.652489215 | 0.007990068 | 0.038346084 |
| CCP110      | 3735.226802 | -0.561154719 | 0.211619417 | -2.651716589 | 0.008008373 | 0.038387031 |
| ZNF171      | 471.4553307 | 0.349348153  | 0.093095981 | 2.651689533  | 0.008009015 | 0.038387031 |
| FIBO39      | 18.41561929 | 0.857884533  | 0.323512841 | 2.651778926  | 0.008005895 | 0.038387031 |
| NRAZAP      | 756.8189818 | 0.426649711  | 0.160888224 | 2.651851427  | 0.008005176 | 0.038387031 |
| MAN2B2      | 3561.242384 | 0.230034171  | 0.086742532 | 2.651919504  | 0.008003573 | 0.038387031 |
| TDRO7       | 1506.593763 | -0.260087562 | 0.098095811 | -2.651362577 | 0.008016773 | 0.038414225 |
| SPAG7       | 2968.266474 | 0.323671848  | 0.122093409 | 2.651018188  | 0.008024952 | 0.038443421 |
| GTF2A2      | 1981.895092 | 0.269017784  | 0.101490861 | 2.650660187  | 0.008033462 | 0.038464192 |
| VPS3B1      | 3248.424878 | 0.357944621  | 0.135036269 | 2.650729506  | 0.008031814 | 0.038464192 |
| NUSAP4      | 497.7701119 | -0.912712328 | 0.344367505 | -2.650402013 | 0.008039604 | 0.038474181 |
| MEITL26     | 3317.000804 | 0.442618637  | 0.167006409 | 2.650309289  | 0.008041811 | 0.038474181 |
| DCAF13      | 1385.545062 | 0.344406604  | 0.129949557 | 2.650309393  | 0.008041796 | 0.038474181 |
| LINS2       | 555.155843  | -0.376687087 | 0.142171667 | -2.649522893 | 0.008060551 | 0.038551643 |
| PTPN7       | 331.8070082 | 0.796767942  | 0.30072907  | 2.649454351  | 0.008062186 | 0.038551643 |
| LIMS        | 275.6246029 | -0.22571162  | 0.085198118 | -2.649414338 | 0.008065526 | 0.038557671 |
| TNXL4B      | 925.6456885 | 0.245101715  | 0.092545982 | 2.648431724  | 0.008086618 | 0.038648413 |
| ANKRD30BL   | 981.273332  | 0.943359029  | 0.356255228 | 2.647986225  | 0.008097282 | 0.038689348 |
| SHBG11      | 4775.758503 | 0.347726097  | 0.131357602 | 2.647171469  | 0.008116818 | 0.038762593 |
| CMY17       | 789.4695467 | 0.572292277  | 0.216180066 | 2.647184188  | 0.008116513 | 0.038762593 |
| CPQ         | 1875.79093  | -0.428650693 | 0.161965662 | -2.646549629 | 0.008131757 | 0.038814866 |
| STK39       | 2761.104013 | -0.507177353 | 0.191644201 | -2.646452913 | 0.008134083 | 0.038814866 |
| ACS2        | 1103.108641 | 0.363451544  | 0.137317982 | 2.646522609  | 0.008132407 | 0.038814866 |
| HNF1P       | 981.1574787 | 0.207501994  | 0.078412337 | 2.646296069  | 0.008137856 | 0.038822817 |
| HVEF3       | 913.5307908 | -0.240618923 | 0.09094297  | -2.645822143 | 0.008149265 | 0.038867186 |
| SFB2        | 1846.518328 | -0.541010868 | 0.204496554 | -2.645744997 | 0.008155233 | 0.038875526 |
| LAMP1       | 19202.96004 | 0.391831873  | 0.148107391 | 2.645592964  | 0.008154788 | 0.038875526 |
| NETN        | 18388.21    | 0.507059096  | 0.191677302 | 2.645378924  | 0.008159948 | 0.038877892 |
| EIF2AK4     | 1904.215542 | 0.208395147  | 0.078775437 | 2.645433094  | 0.008158642 | 0.038877892 |
| BST2        | 6115.990783 | 0.677066087  | 0.256037452 | 2.644402564  | 0.008183527 | 0.038900155 |
| FEI1A       | 1174.056103 | -0.971600573 | 0.362155413 | -2.644170348 | 0.008189146 | 0.038996838 |
| SYN2        | 6777.202314 | 0.600061788  | 0.226992356 | 2.643333037  | 0.008204678 | 0.039060224 |
| EFTUD2      | 4003.853673 | 0.263421595  | 0.099658228 | 2.643248503  | 0.008211474 | 0.039072879 |
| HEPPOA1     | 48261.9488  | 0.174838708  | 0.066143387 | 2.643328629  | 0.008209531 | 0.039072879 |
| ZNF488      | 2223.734461 | -0.674065768 | 0.255053413 | -2.642841592 | 0.008221349 | 0.039109767 |
| CLOR55      | 22.60031774 | 1.005130807  | 0.380493121 | 2.64165303   | 0.008250253 | 0.039237137 |
| ARID1A      | 3800.24758  | -0.335244055 | 0.126930709 | -2.641157987 | 0.008262318 | 0.039284381 |
| MEI1        | 3469.054542 | 0.392210715  | 0.148536697 | 2.640497077  | 0.008278451 | 0.039350933 |
| EPBA14A     | 510.4410461 | -0.3989132   | 0.151080391 | -2.640403547 | 0.008280736 | 0.039351646 |
| AGO3        | 1417.834076 | -0.331021458 | 0.12537422  | -2.640267338 | 0.008284065 | 0.039357918 |
| TRIM69      | 926.2168113 | -0.763584517 | 0.289266621 | -2.639725988 | 0.008297308 | 0.039370327 |
| CCL19       | 26.12030876 | -1.306707562 | 0.495029367 | -2.639656653 | 0.008299006 | 0.039370327 |
| CORF152     | 5.644719349 | -0.738486607 | 0.279768848 | -2.639631515 | 0.008299621 | 0.039370327 |
| SNRPB       | 2055.786104 | 0.28000648   | 0.106077909 | 2.639632947  | 0.008299586 | 0.039370327 |
| VRS         | 3989.254389 | 0.250254437  | 0.094801009 | 2.639785664  | 0.008295824 | 0.039370327 |
| IPP1        | 918.4048892 | 0.21661403   | 0.082052306 | 2.639944604  | 0.008292186 | 0.039370327 |
| DNMB        | 2606.864223 | -0.647801527 | 0.245438121 | -2.639988016 | 0.008306076 | 0.039409806 |
| ANKK1       | 3902.599478 | -0.480548305 | 0.185895873 | -2.638833754 | 0.008319177 | 0.039435766 |
| POLR2J2     | 2400.922978 | -0.315220201 | 0.119455578 | -2.638806885 | 0.008319836 | 0.039435766 |
| ATP9A1      | 6804.927337 | -0.735745958 | 0.278844998 | -2.638548163 | 0.008326187 | 0.039455722 |
| OR2W3       | 243.2938929 | -0.371295596 | 0.140746083 | -2.638081098 | 0.008337664 | 0.039489799 |
| ARMC1       | 450.6559089 | 0.472847736  | 0.179234551 | 2.638150589  | 0.008335956 | 0.039489799 |
| DU5A4       | 454.7522227 | -0.298937689 | 0.113322589 | -2.637935567 | 0.008341243 | 0.039496599 |
| JADE3       | 545.3099328 | -0.59009276  | 0.22367871  | -2.63775391  | 0.008345725 | 0.039501504 |
| TMEM233     | 131.8135985 | 0.902904169  | 0.342316183 | 2.637632143  | 0.008348709 | 0.039501504 |
| JWA1        | 689.5901454 | 0.98684209   | 0.374132253 | 2.637682481  | 0.00834747  | 0.039501504 |
| RSU1        | 2120.591687 | -0.411387406 | 0.155975965 | -2.637505121 | 0.008351836 | 0.039506159 |
| FANCF       | 511.6651404 | 0.341569408  | 0.129509335 | 2.637411487  | 0.008354142 | 0.039506929 |
| EFNA4       | 149.1502    | 0.589559807  | 0.223530309 | 2.637225040  | 0.008358711 | 0.03951839  |
| NMS2L1      | 365.5941149 | -0.428337029 | 0.162452971 | -2.636833667 | 0.008372086 | 0.039566568 |
| MFSD8       | 877.9218518 | -0.288978518 | 0.10960160  | -2.636624265 | 0.008373513 | 0.039566568 |
| TKO3        | 2628.464787 | -0.287130819 | 0.10897978  | -2.636551652 | 0.008373545 | 0.039566568 |
| CHRNA6      | 33.59444242 | 0.984682682  | 0.373532387 | 2.636137362  | 0.008385578 | 0.039584481 |
| MVP         | 9363.946101 | 0.58577066   | 0.222200934 | 2.636220507  | 0.008383523 | 0.039584481 |
| WDR75       | 1554.281539 | 0.186621837  | 0.070790487 | 2.636255589  | 0.008382649 | 0.039584481 |
| HPS1        | 3689.183471 | 0.312635676  | 0.118606065 | 2.635916439  | 0.008391039 | 0.039600118 |
| SEPECS      | 647.0767087 | -0.320834171 | 0.121738804 | -2.635430611 | 0.00840306  | 0.039646699 |
| DCAF17      | 757.443018  | -0.353692854 | 0.134234919 | -2.634879528 | 0.008416713 | 0.039700946 |
| BTAF1       | 1704.830051 | -0.513396669 | 0.1948724   | -2.63452736  | 0.008425451 | 0.039731996 |
| POMP        | 4307.680816 | 0.382238698  | 0.145146639 | 2.633465718  | 0.008451837 | 0.039846227 |
| P3H1        | 745.2862344 | 0.427723358  | 0.162430638 | 2.633267773  | 0.008456765 | 0.039859262 |
| OR1L8       | 9.82344913  | -0.906003089 | 0.344071888 | -2.633179637 | 0.008458959 | 0.039859413 |
| SEPPIN1     | 14361.51849 | 0.802976041  | 0.304899419 | 2.632799675  | 0.008464828 | 0.039883633 |
| AP0CA-AP0C2 | 81.9335868  | 0.997524488  | 0.378876345 | 2.632849744  | 0.008467118 | 0.039883633 |
| ANGL2       | 1427.793721 | -0.213766862 | 0.081205114 | -2.631607888 | 0.008498186 | 0.040013568 |
| PCCA        | 843.5204233 | -0.363569134 | 0.138164202 | -2.631427896 | 0.008502691 | 0.040024543 |
| TMEM161A    | 1231.923869 | 0.361105446  | 0.137245754 | 2.631086469  | 0.008511238 | 0.040054546 |
| MSH1        | 506.4769753 | -0.306445    | 0.116481546 | -2.630845931 | 0.008517264 | 0.040072672 |
| SBF1        | 10875.19445 | -0.303129859 | 0.115240521 | -2.630410347 | 0.008528186 | 0.040112202 |
| PCHB14      | 436.9151528 | -0.461701564 | 0.175532655 | -2.630288724 | 0.008531238 | 0.040112202 |
| TNFSF15     | 72.01410534 | 0.864874431  | 0.328818266 | 2.630250566  | 0.008532196 | 0.040112202 |
| MTMR4       | 2685.88866  | -0.350611265 | 0.133346229 | -2.629330193 | 0.008555325 | 0.04021068  |
| GCLC        | 3209.191617 | -0.403743388 | 0.153570065 | -2.629053382 | 0.008562292 | 0.04022291  |
| ALKB6       | 4826.602606 | 0.233172864  | 0.088690539 | 2.629061315  | 0.008562092 | 0.04022291  |
| XKR3        | 5.688680009 | 1.764788378  | 0.671488364 | 2.62871197   | 0.00858453  | 0.040317101 |
| NSMCE2      | 505.880434  | -0.309900654 | 0.117983683 | -2.626639548 | 0.008623252 | 0.040478329 |
| INH8        | 11.07561666 | 1.23578937   | 0.470481973 | 2.626645323  | 0.008632116 | 0.040478329 |
| PEX5        | 4359.413692 | -0.720053327 | 0.274174329 | -2.626260931 | 0.008632861 | 0.040509765 |
| ZNF552      | 242.1294234 | 0.403763202  | 0.153784168 | 2.626202395  | 0.008634346 | 0.040509766 |
| AKTIP       | 2699.106692 | -0.3225273   | 0.122777231 | -2.625507111 | 0.008652    | 0.040582263 |
| GLIPR2      | 5472.5714   | 0.529609356  | 0.20177032  | 2.624812979  | 0.008669657 | 0.040644394 |
| RIT1        | 1031.25228  | 0.301692209  | 0.114934784 | 2.624899092  | 0.008667465 | 0.040644394 |
| SMARCA1     | 1039.636987 | 0.21158332   | 0.080633095 | 2.624025774  | 0.008689721 | 0.040728094 |
| FA1         | 2089.060553 | -0.41294003  | 0.157399806 | -2.623516132 | 0.008707232 | 0.040769525 |
| NPIG6B      | 22.53721057 | 1.029339159  | 0.392352485 | 2.62350624   | 0.008702985 | 0.040769525 |
| ZNF100      | 432.2162714 | -0.420516688 | 0.160332916 | -2.622772025 | 0.008717261 | 0.040842471 |
| SPX         | 1415.353141 | -0.909595853 | 0.346966668 | -2.622612344 | 0.008725849 | 0.040842471 |
| ATF6        | 2281.854159 | -0.244284608 | 0.093147656 | -2.622552401 | 0.008727385 | 0.040842471 |
| GRM3        | 3683.121028 | -0.766097108 | 0.292133759 | -2.622316267 | 0.008733434 | 0.040842471 |
| CHEK2D      | 3329.944453 | 0.529910597  | 0.221146597 | 2.62229146   | 0.008734007 | 0.040842471 |
| ZNF747      | 1053.119467 | 0.158562075  | 0.060463428 | 2.622445994  | 0.00873011  | 0.040842471 |
| TUT1        | 1214.284547 | 0.273023852  | 0.104107299 | 2.62252463   |             |             |

|               |             |              |             |              |             |             |
|---------------|-------------|--------------|-------------|--------------|-------------|-------------|
| MSF1          | 1530.251131 | 0.32688924   | 0.124628431 | 2.621309933  | 0.008759363 | 0.040939584 |
| FRWV          | 31930.48124 | -0.856835971 | 0.326891068 | -2.621166681 | 0.008762941 | 0.040935922 |
| WAP1G.DS1     | 4683.4061   | -0.39050168  | 0.150720652 | -2.621075223 | 0.008765292 | 0.040936534 |
| NOF2          | 1281.86212  | 0.402377195  | 0.153525087 | 2.620921467  | 0.008769246 | 0.04094625  |
| CEP290        | 1113.285437 | -0.335391197 | 0.127973415 | -2.620788049 | 0.008772678 | 0.040950726 |
| TESK1         | 3205.206425 | 0.280780833  | 0.107145261 | 2.620562311  | 0.008778489 | 0.040967021 |
| TUUFM         | 9680.357667 | 0.303493455  | 0.115824738 | 2.620281816  | 0.008785713 | 0.040990355 |
| GLR02         | 709.4704542 | 0.231437032  | 0.088336345 | 2.619952542  | 0.0087942   | 0.04101957  |
| FAS70K5       | 694.9688031 | 0.310613852  | 0.118582071 | 2.619399802  | 0.008808465 | 0.04105707  |
| TMEM128       | 1355.918669 | -0.296436488 | 0.113187526 | -2.618985491 | 0.00881917  | 0.041094433 |
| CUL7          | 1349.97949  | 0.326460446  | 0.124650663 | 2.619002878  | 0.00881872  | 0.041094433 |
| PRSS23        | 4875.116313 | 0.711311428  | 0.271592222 | 2.61904197   | 0.00881771  | 0.041094433 |
| EXOC3         | 4066.238602 | 0.213370507  | 0.081473882 | 2.618882297  | 0.008821838 | 0.041096475 |
| TMEM1798      | 1938.192872 | 0.396380024  | 0.151388929 | 2.618289367  | 0.008837183 | 0.041157555 |
| OXI           | 29917.147   | -0.584580731 | 0.223291628 | -2.618014576 | 0.008844303 | 0.041173918 |
| NBDAT2        | 3349.287094 | -0.324236601 | 0.123852118 | -2.617934023 | 0.008846391 | 0.041173918 |
| MM1           | 4933.31523  | 0.282624755  | 0.107861149 | 2.617911711  | 0.008846969 | 0.041173918 |
| PYROXD2       | 625.4701541 | -0.314640348 | 0.12023736  | -2.618281681 | 0.008857136 | 0.04128364  |
| ACD07325.4    | 938.184978  | 0.5380641    | 0.205617976 | 2.616814496  | 0.008875456 | 0.04128364  |
| PRM3          | 875.419653  | -0.363713217 | 0.139004073 | -2.616565184 | 0.00888194  | 0.041303376 |
| ATP5MC3       | 5397.565389 | 0.244825158  | 0.093286896 | 2.616019636  | 0.008896144 | 0.041358991 |
| MAOB          | 18597.83469 | -0.649658006 | 0.248357031 | -2.615822886 | 0.008901272 | 0.041361961 |
| SNAPC2        | 1137.956357 | 0.34515951   | 0.131949592 | 2.615843713  | 0.008900729 | 0.041361961 |
| HGF           | 8948.87866  | 0.254222028  | 0.097191353 | 2.615685671  | 0.008904849 | 0.041368154 |
| SYT14         | 447.853473  | -0.521603343 | 0.199437291 | -2.615375191 | 0.008912949 | 0.04139347  |
| AMDF-PLA2G.4B | 1236.077663 | -0.556776618 | 0.212909283 | -2.615085498 | 0.008920434 | 0.041409238 |
| OICAR2        | 1521.172244 | 0.545935438  | 0.208757591 | 2.615164487  | 0.008918465 | 0.041409238 |
| ZNRF2         | 627.5559555 | -0.348270693 | 0.133159396 | -2.614963683 | 0.008923694 | 0.041413942 |
| UBEB          | 2320.786873 | 0.190340521  | 0.073802319 | 2.614484413  | 0.008936228 | 0.041461549 |
| GLCC16A       | 1641.812147 | -0.192181405 | 0.073510809 | -2.614326443 | 0.008940357 | 0.041470385 |
| PTPM13        | 3588.882264 | -0.516287167 | 0.197514118 | -2.613925389 | 0.008950858 | 0.04147761  |
| RENBP         | 2639.8268   | 0.515302769  | 0.197137691 | 2.613923129  | 0.008950917 | 0.04147761  |
| DPEP2         | 696.7302388 | 0.779473026  | 0.298191956 | 2.613997493  | 0.008948969 | 0.04147761  |
| AMV           | 4738.204027 | 0.191188856  | 0.073137188 | 2.614112755  | 0.008949591 | 0.04147761  |
| METTL25       | 167.9447013 | -0.349815621 | 0.133833729 | -2.613823805 | 0.00895352  | 0.041479239 |
| TFPT          | 2576.863602 | 0.581088633  | 0.22238538  | 2.612980367  | 0.008975646 | 0.041550409 |
| LRTM1         | 442.3590967 | 0.929287599  | 0.355633085 | 2.613051595  | 0.008973775 | 0.041550409 |
| MTRF1L        | 1685.23783  | 0.205406625  | 0.078606151 | 2.613111333  | 0.008972207 | 0.041550409 |
| CRY11         | 3928.91161  | -0.393176641 | 0.150485228 | -2.612725828 | 0.008982333 | 0.041570922 |
| EH4           | 1808.299831 | 0.387879568  | 0.14848631  | 2.612229794  | 0.008995378 | 0.041610399 |
| PRPF18        | 481.7469023 | 0.226828099  | 0.086830888 | 2.612303374  | 0.008993441 | 0.041610399 |
| TLL7          | 5912.678717 | -0.695484934 | 0.266276382 | -2.612028517 | 0.009000675 | 0.04162445  |
| ECDC141       | 54.3663099  | -0.488482545 | 0.187035076 | -2.611716232 | 0.0090089   | 0.041632039 |
| FRH1          | 2482.849382 | 0.17732266   | 0.067901189 | 2.611404088  | 0.009017128 | 0.04167962  |
| CREG1         | 7646.348344 | 0.474073768  | 0.181599582 | 2.610944373  | 0.009039824 | 0.041774063 |
| BCL10         | 657.6438712 | 0.966185826  | 0.370159166 | 2.610190199  | 0.009049189 | 0.041806847 |
| ZDHX3         | 8274.007914 | -0.429716215 | 0.164661057 | -2.609701552 | 0.009062124 | 0.041856113 |
| LIMCH1        | 7580.717159 | -0.583565945 | 0.223690286 | -2.608812719 | 0.009085709 | 0.041954532 |
| WDR43         | 1148.562203 | 0.264341166  | 0.101338308 | 2.608501858  | 0.009093952 | 0.041982074 |
| THBO          | 630.8239051 | 0.766357452  | 0.293832906 | 2.608140323  | 0.009103563 | 0.042015917 |
| NRKE2         | 975.6024104 | -0.189638582 | 0.072222996 | -2.607708934 | 0.009115042 | 0.042016287 |
| SHRF2         | 77.4775943  | 0.825453367  | 0.316537662 | 2.60775198   | 0.009113757 | 0.042016287 |
| PRAMEF2       | 2.02042309  | 1.316944466  | 1.215456709 | 2.607780634  | 0.009113134 | 0.042016287 |
| NFG.E8        | 5507.202023 | 0.541306875  | 0.207568573 | 2.607846015  | 0.009111993 | 0.042016287 |
| SHMT2         | 2463.205002 | 0.445967723  | 0.171007339 | 2.607886462  | 0.009110317 | 0.042016287 |
| CDK18         | 27979.86952 | -0.562923978 | 0.215891726 | -2.607430564 | 0.009122298 | 0.042039212 |
| DN5           | 1697.572386 | 0.199709706  | 0.076611527 | 2.605649131  | 0.0091433   | 0.042113648 |
| GR3           | 1332.045927 | 0.520603551  | 0.194166018 | 2.605344593  | 0.009151434 | 0.042152407 |
| SLCC5A4B      | 350.7420907 | -0.87581891  | 0.346065725 | -2.60622194  | 0.009154712 | 0.042159665 |
| CSNK2A2       | 2487.947623 | 0.1724749    | 0.066184992 | 2.605951815  | 0.009161935 | 0.042169156 |
| RAD23A        | 6641.561321 | 0.272976481  | 0.104750564 | 2.605966696  | 0.009161537 | 0.042169156 |
| NFKB1L1       | 1494.794094 | 0.400755711  | 0.153799733 | 2.605698347  | 0.009168717 | 0.042189834 |
| SFTPD         | 128.2420309 | 0.77291283   | 0.296678822 | 2.605217403  | 0.009181598 | 0.04223856  |
| KDR           | 959.2963236 | -0.451275583 | 0.173233541 | -2.605012752 | 0.009187084 | 0.04225329  |
| SLC35A4       | 3713.859669 | 0.281224938  | 0.107959683 | 2.604907045  | 0.009189919 | 0.042255742 |
| MYH9B         | 797.222621  | -0.757394688 | 0.290771287 | -2.60477816  | 0.009193376 | 0.042261096 |
| MRPS5         | 2671.809697 | 0.280342685  | 0.107664058 | 2.603885116  | 0.009217903 | 0.042363274 |
| NUOF18        | 667.8963759 | 0.488543437  | 0.187638438 | 2.603642641  | 0.009223888 | 0.042380211 |
| VRK3          | 1736.894888 | 0.23700643   | 0.091033648 | 2.603503592  | 0.00922763  | 0.042388833 |
| EXOSC1        | 887.503117  | 0.30009476   | 0.115286824 | 2.603027398  | 0.009240457 | 0.042435181 |
| BICRA         | 1313.903885 | 0.348771011  | 0.095393108 | 2.602599303  | 0.009251718 | 0.0424763   |
| PAH2          | 21132.6662  | -0.58994021  | 0.226231592 | -2.602460309 | 0.009255751 | 0.042484242 |
| COL2A         | 1312186354  | 2.40821082   | 0.925640278 | 2.601884663  | 0.009271304 | 0.042545033 |
| OR56A1        | 20.86103064 | -0.645603855 | 0.248187851 | -2.601270986 | 0.009287906 | 0.042616068 |
| CATS.PE       | 76.6026505  | -0.48001752  | 0.184538635 | -2.601090833 | 0.009292785 | 0.042622381 |
| CM51          | 914.7700048 | -0.383085933 | 0.147331775 | -2.600158277 | 0.009318077 | 0.042717126 |
| BAHD1         | 1509.209527 | 0.299172398  | 0.115056362 | 2.600224744  | 0.009316272 | 0.042717126 |
| ACD36214.3    | 9.766072198 | -0.867362437 | 0.33360228  | -2.599989339 | 0.00932266  | 0.042727907 |
| DMKN          | 232.1761888 | 0.621013125  | 0.238886613 | 2.599614595  | 0.009332851 | 0.042742325 |
| IL13RAP       | 60.57294651 | 1.018778864  | 0.39189501  | 2.599621936  | 0.009332652 | 0.042742325 |
| GSX2          | 295.1223786 | 1.075614959  | 0.413748706 | 2.599681747  | 0.009331025 | 0.042742325 |
| TTL3          | 4115.282958 | -0.287240772 | 0.110508886 | -2.599254974 | 0.009342635 | 0.042765877 |
| PRAMEF1       | 3.032403749 | 2.399536471  | 0.9231357   | 2.599332331  | 0.00934053  | 0.042765877 |
| ARR1A1        | 4508.174289 | 0.361774351  | 0.13919065  | 2.599182661  | 0.009346085 | 0.042771043 |
| CRBP          | 383.754863  | -0.650836888 | 0.250439198 | -2.598782048 | 0.009355115 | 0.042797949 |
| TINCR         | 231.6788072 | 0.649690725  | 0.249996133 | 2.598803115  | 0.009354941 | 0.042797949 |
| CDG7          | 1039.998662 | -0.205063894 | 0.078942391 | -2.597640083 | 0.009386682 | 0.042924856 |
| PLXDC2        | 3874.343782 | -0.63485024  | 0.244466063 | -2.596884947 | 0.009407343 | 0.042987335 |
| RNF7          | 2586.601206 | 0.332916363  | 0.128197334 | 2.596905497  | 0.00940678  | 0.042987335 |
| CDX19         | 866.4752547 | 0.215775963  | 0.083086186 | 2.59701368   | 0.009403818 | 0.042987335 |
| NFATC2        | 609.4102219 | -0.527147605 | 0.203020636 | -2.596522288 | 0.00941728  | 0.043022074 |
| MPDU1         | 2779.034151 | 0.340057498  | 0.130973013 | 2.596393624  | 0.009420807 | 0.043027523 |
| B3GN19        | 1236.22743  | -0.410218474 | 0.1580169   | -2.596041774 | 0.00943046  | 0.043066938 |
| HECTD4        | 4216.90908  | -0.464903428 | 0.179114045 | -2.59557216  | 0.009443357 | 0.043109148 |
| BLG.2         | 4106.733128 | -0.797326922 | 0.30720936  | -2.595386163 | 0.00944847  | 0.043121805 |
| CSDC2         | 1223.254618 | 0.649587937  | 0.25030205  | 2.595216209  | 0.009453143 | 0.043132453 |
| MCTD2         | 5026.6583   | 0.283493025  | 0.109255964 | 2.59476018   | 0.009465694 | 0.043179025 |
| ACD05702.1    | 87.8188981  | 0.657007309  | 0.253219365 | 2.594617150  | 0.009466634 | 0.043186309 |
| ANKAR         | 95.81897808 | -0.403599445 | 0.15557573  | -2.59423491  | 0.009480169 | 0.043218599 |
| UTP11         | 1242.123802 | 0.239563215  | 0.092500242 | 2.594190118  | 0.009481404 | 0.043218599 |
| GSABR3        | 7.251517931 | -0.8011012   | 0.308929515 | -2.593152031 | 0.009510072 | 0.043388555 |
| OR6D4         | 5.295185747 | -0.86860926  | 0.334888088 | -2.592956552 | 0.009515504 | 0.043352588 |
| MRRF          | 946.0334134 | -0.206908743 | 0.079822029 | -2.592125829 | 0.009538488 | 0.043446562 |
| ANKRD11       | 6337.309223 | -0.25576054  | 0.098677495 | -2.591883194 | 0.009545217 | 0.043449573 |
| DN.ABS        | 2307.179774 | 0.45896188   | 0.17079708  | 2.591846991  | 0.009546222 | 0.043449573 |
| BO.RC.8       | 1378.149324 | 0.300219199  | 0.115827551 | 2.591494802  | 0.00954337  | 0.043449573 |
| ARMBG         | 1343.584272 | -0.18464973  | 0.071256419 | -2.591341699 | 0.009560251 | 0.043502683 |
| VGF           | 3337.181126 | 1.069919553  | 0.412906063 | 2.591193612  | 0.009564367 | 0.043510667 |
| TNFAIP3       | 1313.873886 | 0.705948663  | 0.273912173 | 2.590957733  | 0.009570925 | 0.043529755 |
| ACD92718.8    | 134.6971033 | -0.581096596 | 0.224303084 | -2.590677375 | 0.009578724 | 0.043554481 |
| TPR3.1L       | 4825.611668 | 0.401627547  | 0.155045002 | 2.590393386  | 0.009586631 | 0.043579881 |
| ECBL.DI       | 570.1540486 | 0.400043691  | 0.154447493 | 2.590160528  | 0.009593119 | 0.043598413 |
| BRX           | 3741.508765 | -0.528935147 | 0.204123328 | -2.589869703 | 0.009601227 | 0.043606228 |
| RBT08         | 1017.520402 | 0.285855161  | 0.110379847 | 2.58974049</ |             |             |

|            |             |              |             |              |             |             |
|------------|-------------|--------------|-------------|--------------|-------------|-------------|
| MPCE13     | 5351.63327  | -0.58632608  | 0.226474996 | -2.588923407 | 0.009627679 | 0.043701598 |
| CLCM       | 775.9799379 | -0.843411300 | 0.325922723 | -2.587844071 | 0.009657869 | 0.043821192 |
| ATG16L2    | 2834.250760 | 0.481555539  | 0.186086037 | 2.587811524  | 0.009658781 | 0.043821912 |
| H6PA2      | 11238.38744 | -6.401515446 | 0.247397663 | -2.587548475 | 0.009666159 | 0.043843872 |
| AL157935.2 | 723.0385345 | 0.583783799  | 0.225638767 | 2.587249554  | 0.009674455 | 0.043871133 |
| FCMR       | 199.397025  | 0.78089797   | 0.301838875 | 2.587135176  | 0.009677762 | 0.043874901 |
| H5T15H8    | 3455783348  | 1.749004566  | 0.676095498 | 2.586919411  | 0.009683824 | 0.043891586 |
| NELFB      | 3783.790691 | 0.250827016  | 0.096865446 | 2.586766924  | 0.009688111 | 0.043900216 |
| NRPL54     | 2181.318645 | 0.500105683  | 0.193338671 | -2.586682112 | 0.009690495 | 0.043900227 |
| TP63       | 14.47731218 | -1.44817026  | 0.442707603 | -2.585943899 | 0.009711274 | 0.043983549 |
| NRPL10     | 1912.920062 | 0.192940367  | 0.074613919 | 2.585849527  | 0.009713933 | 0.043984783 |
| AP1M1      | 3940.324089 | 0.206016076  | 0.079681153 | 2.585505697  | 0.009723627 | 0.044017862 |
| NM         | 752.2594162 | 0.518879043  | 0.200705599 | 2.585274489  | 0.009730155 | 0.044036574 |
| SPAG4      | 250.0920472 | 0.703217968  | 0.272076299 | 2.584635176  | 0.009748208 | 0.044107472 |
| EM6        | 527.1469889 | -0.455583951 | 0.176283118 | -2.584401540 | 0.009754812 | 0.044136519 |
| LONP1      | 5950.310992 | 0.31865908   | 0.123335225 | 2.584401145  | 0.009763316 | 0.044143314 |
| ZFYVE27    | 2282.9393   | 0.27224889   | 0.105614393 | 2.5841636    | 0.009761548 | 0.044143314 |
| OTDA       | 205.8676337 | 0.840421974  | 0.32525876  | 2.583856538  | 0.009770243 | 0.044163797 |
| PIGG       | 2265.000062 | -0.191058303 | 0.073945688 | -2.583758328 | 0.009773025 | 0.044165541 |
| ALPL       | 1169.338063 | 0.458139914  | 0.177323043 | 2.583660257  | 0.009775804 | 0.044167269 |
| EPST11     | 728.4175242 | -0.529172272 | 0.204824552 | -2.583539268 | 0.009779233 | 0.044171934 |
| ENAM       | 3.363256387 | 1.027745783  | 0.397874548 | 2.583090044  | 0.009791976 | 0.044218655 |
| NDFU3A3    | 457.8198385 | 0.409741689  | 0.158641716 | 2.582811762  | 0.009799878 | 0.044234494 |
| RPL38      | 17995.80179 | 0.47674165   | 0.184593513 | 2.582656557  | 0.009804286 | 0.044253558 |
| PKD2       | 1978.074915 | -0.341596562 | 0.132297292 | -2.582040466 | 0.009821807 | 0.044320783 |
| TBC1D10C   | 135.5367753 | 0.792048558  | 0.306783478 | 2.581784594  | 0.009829091 | 0.044342796 |
| NOMO2      | 6833.890831 | 0.323050154  | 0.125140574 | 2.581488097  | 0.009837253 | 0.044347051 |
| HNT1       | 8539.17989  | 0.320730369  | 0.124238678 | 2.581366179  | 0.009835313 | 0.044347051 |
| WYH9B      | 15244.48845 | 0.224007215  | 0.085769699 | 2.58162361   | 0.009833508 | 0.044347051 |
| ACR        | 31.68911542 | -0.589217222 | 0.220515099 | -2.581297925 | 0.009842296 | 0.044361923 |
| ARV1       | 1152.280343 | -0.246227978 | 0.095407217 | -2.580797296 | 0.009857244 | 0.044415441 |
| ZNF664     | 8826.788417 | -0.37432366  | 0.14506126  | -2.580452289 | 0.009867099 | 0.044448977 |
| PPP1R32    | 320.759667  | -0.529142492 | 0.205085208 | -2.580110475 | 0.009876871 | 0.044452608 |
| ACD11511.4 | 1547.915899 | 0.706996361  | 0.274020396 | 2.580086629  | 0.009877533 | 0.044452608 |
| SELEN O5   | 2270.534349 | 0.294545274  | 0.114158073 | 2.580152829  | 0.009875566 | 0.044452608 |
| CLL2       | 6010.622612 | 0.919420546  | 0.356321252 | 2.580313531  | 0.009871065 | 0.044452608 |
| BMO4987.1  | 49.17308302 | -0.924982307 | 0.358521236 | -2.579993008 | 0.009880029 | 0.044453796 |
| CCCB6      | 1434.676073 | 0.385204958  | 0.149334252 | 2.579481893  | 0.009894865 | 0.044508777 |
| ENOPH1     | 4449.890371 | -0.298484715 | 0.115722642 | -2.579311272 | 0.009895974 | 0.044519903 |
| STK26      | 89.6988193  | 0.813385348  | 0.315386989 | 2.579007303  | 0.009908469 | 0.044537961 |
| PARP10     | 4219.17666  | 0.488457993  | 0.189394994 | 2.579043843  | 0.009907421 | 0.044537961 |
| RNF8       | 1142.831209 | 0.204443852  | 0.079275777 | 2.57890087   | 0.009911522 | 0.044540221 |
| ADCI       | 10.77899487 | 1.176826301  | 0.533075368 | 2.578445354  | 0.0099246   | 0.044588119 |
| CCDC7      | 118.2296334 | -0.439886958 | 0.170314697 | -2.578091406 | 0.009934771 | 0.044622829 |
| GMP2       | 5594.070123 | 0.808605457  | 0.313655136 | 2.578008019  | 0.009937169 | 0.044622829 |
| LRBA       | 841.5975627 | -0.442617100 | 0.171735006 | -2.577326042 | 0.009956798 | 0.044700083 |
| DOF        | 3507.080943 | 0.393448887  | 0.152676465 | 2.577010723  | 0.009965886 | 0.044729983 |
| ZGRF1      | 452.1358198 | -0.669164304 | 0.259703565 | -2.576646591 | 0.009976389 | 0.044756007 |
| RPL23      | 21395.31913 | 0.375774788  | 0.145838997 | 2.576641334  | 0.009976541 | 0.044756007 |
| PNPLA2     | 5042.058069 | 0.31869265   | 0.123018284 | 2.576549113  | 0.009979203 | 0.044757052 |
| RGL1       | 3955.272232 | -0.377333261 | 0.146484269 | -2.575930259 | 0.009997081 | 0.044805069 |
| ZMYND11    | 4774.190612 | -0.395357888 | 0.153484983 | -2.575873422 | 0.009998724 | 0.044805069 |
| NDFJF3     | 2345.844208 | 0.266610487  | 0.103510965 | 2.575673866  | 0.010004496 | 0.044805069 |
| EXTL3      | 3626.836802 | 0.253914275  | 0.098579178 | 2.575739419  | 0.0100026   | 0.044805069 |
| CBS2       | 498.3435979 | 0.747021664  | 0.290017431 | 2.575781946  | 0.01000137  | 0.044805069 |
| ZNF628     | 405.9210383 | 0.387973540  | 0.150620085 | 2.575842059  | 0.009999631 | 0.044805069 |
| NRP13      | 1350588305  | -1.613903031 | 0.626793513 | -2.574855988 | 0.010020383 | 0.04490024  |
| TBC1D10A   | 1132.482337 | 0.351637155  | 0.136579796 | 2.574691303  | 0.010035859 | 0.044923699 |
| ATXN7      | 813.7560491 | -0.366298087 | 0.142318634 | -2.573788668 | 0.010059169 | 0.045017104 |
| RELN       | 263.7008738 | -0.710381465 | 0.276055683 | -2.573336718 | 0.010072607 | 0.045064004 |
| TES        | 381.9030086 | 0.587263702  | 0.228217758 | 2.573260324  | 0.01007454  | 0.045064004 |
| ZNF511     | 954.5730301 | 0.289977796  | 0.112739775 | 2.57202884   | 0.010108416 | 0.04520456  |
| NUF2       | 133.1507229 | -0.821416912 | 0.319830381 | -2.570298309 | 0.010161098 | 0.045429128 |
| NPW        | 95.22304737 | 1.03272553   | 0.401825619 | 2.570083844  | 0.01016739  | 0.045446238 |
| KRTAP5-7   | 21.3801816  | -0.916248098 | 0.356575971 | -2.569573309 | 0.010182385 | 0.045482501 |
| USP8N1     | 758.1154551 | -0.289136366 | 0.112523883 | -2.569555523 | 0.010182907 | 0.045482501 |
| HVAL3      | 248.9779925 | 0.533991012  | 0.207801802 | 2.569713102  | 0.010178277 | 0.045482501 |
| WPB1L      | 3306.838303 | 0.236522703  | 0.092058131 | 2.56927552   | 0.01019114  | 0.045497217 |
| ARID3A     | 502.3746068 | 0.301730333  | 0.117435347 | 2.569331473  | 0.010189494 | 0.045497217 |
| INPP5K     | 2128.877201 | 0.185063172  | 0.072044968 | 2.568717551  | 0.010207562 | 0.045559495 |
| ZNF606     | 718.13233   | 0.292345631  | 0.11383757  | 2.568365111  | 0.010217944 | 0.045594792 |
| TGF12      | 4370.988924 | -0.59113676  | 0.230205661 | -2.567863719 | 0.010223738 | 0.045649752 |
| TCEA7      | 2616.151997 | -0.382835467 | 0.149129969 | -2.567126316 | 0.010254525 | 0.045735876 |
| INT54      | 893.0986872 | -0.230814163 | 0.089914897 | -2.567029156 | 0.010257399 | 0.045735949 |
| RADS2      | 540.3049445 | -0.349659292 | 0.136217888 | -2.566911713 | 0.010260873 | 0.045735949 |
| CST2       | 4.04097599  | 1.926974247  | 0.750782079 | 2.566622593  | 0.010269432 | 0.045735949 |
| PORCN      | 941.3306237 | 0.378790574  | 0.14758053  | 2.566670173  | 0.010268017 | 0.045735949 |
| IPO4       | 1333.634571 | 0.436086128  | 0.169901968 | 2.566692625  | 0.010267358 | 0.045735949 |
| HPX        | 79.45360144 | 0.627842774  | 0.244608375 | 2.566726403  | 0.010266358 | 0.045735949 |
| SMYD5      | 1629.734597 | 0.211584589  | 0.082442919 | 2.566437379  | 0.010274918 | 0.045749325 |
| DTL        | 178.2166904 | -1.04651158  | 0.407793852 | -2.56627601  | 0.010279699 | 0.045759556 |
| CEP95L     | 453.1954419 | -0.37338322  | 0.145565999 | -2.566109708 | 0.010284629 | 0.045764169 |
| VDAC3      | 4626.41051  | 0.245375082  | 0.095622778 | 2.566073563  | 0.010285701 | 0.045764169 |
| PSMC4      | 4557.996339 | 0.27844808   | 0.108531921 | 2.565586943  | 0.01030014  | 0.045817351 |
| UBN11      | 1947.491376 | 0.336820145  | 0.131101059 | 2.565250919  | 0.010310122 | 0.045850683 |
| TGFBPAP1   | 1631.576489 | 0.183742375  | 0.071640633 | 2.564778219  | 0.010324159 | 0.045902034 |
| SEC13      | 4238.69953  | 0.271686707  | 0.105956671 | 2.564130268  | 0.010343472 | 0.045976806 |
| BTNL9      | 562.3352281 | -0.783864805 | 0.30575451  | -2.563706438 | 0.010356109 | 0.046013728 |
| MWP28      | 1326.583914 | 0.560081309  | 0.218467352 | 2.563684246  | 0.010356772 | 0.046013728 |
| HST21HA    | 186.3437811 | 0.787460395  | 0.307171276 | 2.563587343  | 0.010359663 | 0.046015481 |
| ZNF644     | 1565.948727 | -0.325435525 | 0.126965715 | -2.563176405 | 0.010371934 | 0.046058883 |
| CYB561A3   | 2247.520962 | 0.472287192  | 0.184263334 | 2.563082174  | 0.010374749 | 0.046060287 |
| NTSC2      | 3175.415814 | -0.294839306 | 0.115052916 | -2.562640877 | 0.010387944 | 0.046107758 |
| RFX3       | 907.5337356 | -0.510431428 | 0.199201135 | -2.562392167 | 0.010395386 | 0.046129683 |
| TMEM34     | 2193.832089 | 0.396215579  | 0.15463386  | 2.562282154  | 0.01039868  | 0.046131911 |
| CNKSR3     | 876.7246648 | -0.359791388 | 0.140447484 | -2.561790329 | 0.010414616 | 0.046192768 |
| RPGRP1     | 47.22397317 | -0.555225582 | 0.216759847 | -2.561478009 | 0.010442784 | 0.046217874 |
| INAFM0     | 1747.883232 | 0.316739167  | 0.123660798 | 2.561208429  | 0.010430876 | 0.046242629 |
| ITGA2      | 1113.14025  | 0.527362016  | 0.205875431 | 2.561073033  | 0.010434942 | 0.046245093 |
| NRNR8      | 2367.302224 | 0.573374998  | 0.223885158 | 2.561022217  | 0.01043645  | 0.046245093 |
| TMEM171    | 68.84853894 | -0.893280234 | 0.348877234 | -2.560299704 | 0.010458193 | 0.046340298 |
| MEF2       | 744.633157  | 0.22324262   | 0.087221196 | 2.559507003  | 0.010482074 | 0.046424934 |
| FAM149B1   | 1278.332443 | -0.442468891 | 0.172880157 | -2.559396633 | 0.010485403 | 0.046428519 |
| EXO2       | 1376.007072 | -0.271646536 | 0.106149778 | -2.559087176 | 0.010494742 | 0.046436399 |
| SILCO4C1   | 15.31211109 | 1.196475423  | 0.467531875 | 2.559131232  | 0.010493412 | 0.046436399 |
| SILCSA5    | 7068.18809  | 0.281204388  | 0.109880677 | 2.55917961   | 0.010491952 | 0.046436399 |
| SYCP2L     | 56.60721327 | -0.636847363 | 0.248928634 | -2.55833182  | 0.010516922 | 0.046515221 |
| GDNF       | 193.4409988 | 0.760697664  | 0.297348772 | 2.55826738   | 0.010519517 | 0.046515221 |
| CL20R65    | 699.675377  | 0.187996928  | 0.073485076 | 2.558300764  | 0.010518507 | 0.046515221 |
| C9orf85    | 468.363479  | -0.223399314 | 0.087321104 | -2.557907572 | 0.010530408 | 0.046538693 |
| SPATA25    | 66.08431019 | -0.782177478 | 0.305788327 | -2.557904948 | 0.010530487 | 0.046538693 |
| HCT        | 687.3564288 | 0.658997817  | 0.25774959  | 2.556737038  | 0.010565908 | 0.046680027 |
| EIF4G1     | 11913.15544 | 0.238227263  | 0.093194844 | 2.556179546  | 0.010582847 | 0.046716767 |
| HWP        | 788.791507  | 0.818535378  | 0.3         |              |             |             |

|           |             |              |             |              |             |             |
|-----------|-------------|--------------|-------------|--------------|-------------|-------------|
| BOE       | 738.822183  | -0.64643468  | 0.253051189 | -2.554560995 | 0.010632181 | 0.046932061 |
| BRCC2     | 1554.169292 | 0.30276802   | 0.118333314 | -2.55438364  | 0.010637998 | 0.046933279 |
| ZSCAN20   | 164.1105437 | 0.319097497  | 0.124959576 | -2.553605795 | 0.010661388 | 0.047026982 |
| ATXN171   | 307.661544  | -0.340050138 | 0.133172158 | -2.553466704 | 0.01066577  | 0.047030501 |
| HCZ3      | 138.3408155 | -0.516898771 | 0.202442593 | -2.553310368 | 0.010670437 | 0.047035297 |
| PKOREJ    | 10.91724202 | -0.881479833 | 0.345232374 | -2.552942448 | 0.010670993 | 0.047035297 |
| ZNFA28    | 4828.468122 | 0.429504466  | 0.168238517 | -2.552949673 | 0.010681493 | 0.047070596 |
| TARSL2    | 2048.856783 | -0.399297857 | 0.156439175 | -2.552416014 | 0.010698787 | 0.047126679 |
| HMG3      | 1535.068684 | 0.46921681   | 0.183841849 | -2.552285085 | 0.010701891 | 0.047126679 |
| POLR2E    | 7053.832363 | 0.25370028   | 0.099398941 | -2.552343001 | 0.010700084 | 0.047126679 |
| SLC24A2   | 6300.75569  | -0.764351036 | 0.299490297 | -2.552172956 | 0.010705336 | 0.047130588 |
| PRCO      | 826.5889792 | -0.719659921 | 0.282013975 | -2.551859072 | 0.010714985 | 0.0471618   |
| FAMT2B    | 102.8106714 | -0.702849096 | 0.27565389  | -2.549752143 | 0.010779953 | 0.047425101 |
| MRI       | 1903.152689 | 0.49467544   | 0.193921298 | -2.549899933 | 0.010778166 | 0.047425101 |
| PPW01     | 1185.15091  | 0.337161712  | 0.093060621 | -2.549539323 | 0.010786533 | 0.047447273 |
| PRD1      | 1305.278559 | -0.527450929 | 0.206896557 | -2.549346133 | 0.010792513 | 0.047457699 |
| NRID2     | 1059.601627 | -0.327938433 | 0.132584118 | -2.548860589 | 0.010807549 | 0.047494828 |
| ZCCH24    | 13468.84578 | -0.508292494 | 0.198422737 | -2.548233853 | 0.010808388 | 0.047494828 |
| TFE3      | 5646.589747 | 0.240477214  | 0.094343021 | -2.548966653 | 0.010804263 | 0.047494828 |
| CNTNAP4   | 6833.374729 | -0.787464948 | 0.309129246 | -2.548600493 | 0.010815612 | 0.047502601 |
| SAYSID    | 734.7029682 | 0.219498765  | 0.086122416 | -2.548683335 | 0.010813044 | 0.047502601 |
| LAM2      | 857.5628813 | -0.490266773 | 0.192393317 | -2.548252614 | 0.010826404 | 0.047538672 |
| TMFF2     | 1719.673892 | -0.606455883 | 0.238053303 | -2.547563409 | 0.010847814 | 0.047611556 |
| TMMD3B    | 463.894014  | -0.277698706 | 0.109006101 | -2.547551954 | 0.01084817  | 0.047611556 |
| CL10F45   | 161.0629403 | 0.540138787  | 0.21209128  | -2.54672793  | 0.010873817 | 0.047712574 |
| FLT3LG    | 455.4363043 | 0.476971331  | 0.187295997 | -2.546630103 | 0.010876865 | 0.047714773 |
| UBL7      | 2925.070583 | 0.370206214  | 0.145376968 | -2.546525892 | 0.010880114 | 0.047717663 |
| TUBA1B    | 57529.5502  | -0.336117067 | 0.132051894 | -2.545340745 | 0.010917115 | 0.047868549 |
| ZNF991    | 330.7391844 | -0.433043061 | 0.17015113  | -2.545047033 | 0.010936303 | 0.047897439 |
| HTS8      | 343.458087  | -0.348419417 | 0.136807843 | -2.544919333 | 0.010930299 | 0.047900466 |
| GPMB4     | 192.2010924 | 0.854117683  | 0.335624775 | -2.544888859 | 0.010932192 | 0.047900466 |
| HST1HE    | 33.19657662 | 0.927133895  | 0.364380233 | -2.544412627 | 0.010946169 | 0.04795031  |
| RIK2      | 794.6965553 | 0.182776195  | 0.071842879 | -2.544110124 | 0.010956544 | 0.047969053 |
| CAS21     | 171.503567  | 0.526378969  | 0.206894566 | -2.544189434 | 0.010953166 | 0.047969053 |
| TRB3      | 734.3996189 | 0.761040764  | 0.299162642 | -2.543903082 | 0.01096215  | 0.047986094 |
| GBF1      | 3078.577134 | -0.209370744 | 0.082319032 | -2.543406281 | 0.01097775  | 0.04801639  |
| NMN2C1    | 6244.347214 | -0.212488693 | 0.083546617 | -2.543354845 | 0.010979367 | 0.04801639  |
| PET117    | 496.7208311 | 0.366277729  | 0.104695635 | -2.543350832 | 0.010979493 | 0.04801639  |
| WRD53     | 335.5497666 | 0.254547864  | 0.100438805 | -2.543417989 | 0.010977382 | 0.04801639  |
| NEA1      | 4178.235828 | 0.286272067  | 0.112571408 | -2.543026432 | 0.010989692 | 0.048038194 |
| CUEDC2    | 4033.020884 | 0.346330496  | 0.13618619  | -2.543066199 | 0.010988441 | 0.048038194 |
| CDPS2     | 1754.615982 | -0.276009203 | 0.108539773 | -2.542911463 | 0.010992679 | 0.048039858 |
| ENAH      | 4627.0266   | 0.318611315  | 0.125113363 | -2.542511633 | 0.011005863 | 0.048086068 |
| SLC39A13  | 3364.188997 | 0.323202021  | 0.127133277 | -2.542236215 | 0.011014571 | 0.048101309 |
| RLA8      | 50507.6501  | 0.618993017  | 0.243478031 | -2.542295148 | 0.011012714 | 0.048101309 |
| SLCO2B1   | 9535.94382  | -0.604002713 | 0.237601719 | -2.542080562 | 0.011019477 | 0.048104442 |
| CLCA2     | 160.9315789 | 0.98215057   | 0.386361952 | -2.542047848 | 0.011020509 | 0.048104442 |
| ZNFT4     | 1207.307079 | -0.31958827  | 0.125754297 | -2.541370571 | 0.011041882 | 0.048186323 |
| RPA1      | 432.0823055 | 0.290818851  | 0.114439423 | -2.541247084 | 0.011045783 | 0.048191939 |
| BAAP2     | 3040.812129 | 0.448832415  | 0.176662609 | -2.540620632 | 0.011065591 | 0.048266931 |
| NPIR3     | 1028.942282 | -0.417409682 | 0.164338071 | -2.539945117 | 0.011086987 | 0.04832594  |
| UNC119    | 1434.736074 | 0.304243438  | 0.119796138 | -2.540026795 | 0.011084938 | 0.04832594  |
| STEAP4    | 98.98499863 | 0.679660711  | 0.267576601 | -2.540060337 | 0.011083335 | 0.04832594  |
| ZNF726    | 94.4113369  | -0.54389829  | 0.214165999 | -2.539432292 | 0.011103253 | 0.048369729 |
| NCPB3     | 2524.746814 | -0.292804955 | 0.115305677 | -2.539380211 | 0.011104907 | 0.048369729 |
| LOXL4     | 193.3568322 | 0.586877953  | 0.231108149 | -2.539420813 | 0.011104015 | 0.048369729 |
| RLEPO1    | 4034.795408 | 0.371353008  | 0.146246308 | -2.539232011 | 0.011109678 | 0.048370067 |
| CVCS      | 5385.354824 | 0.281469717  | 0.110854049 | -2.539101604 | 0.011113748 | 0.048385367 |
| RDN4      | 410.1651867 | -0.580918623 | 0.22880817  | -2.538959872 | 0.011118257 | 0.048393568 |
| CS16      | 12.09306582 | 1.097740228  | 0.432384288 | -2.538806929 | 0.011123119 | 0.048403295 |
| RAS1      | 1471.549314 | -0.377690768 | 0.148745426 | -2.538631127 | 0.011128709 | 0.048406483 |
| DKX       | 1147.919843 | -0.480964262 | 0.189459041 | -2.538618689 | 0.011129105 | 0.048406483 |
| CCL7      | 70.91794352 | 1.656561424  | 0.652769078 | -2.537744934 | 0.011156927 | 0.048516045 |
| VSTM2B    | 1591.115081 | -0.762512472 | 0.300609529 | -2.537398645 | 0.01116797  | 0.048552612 |
| COP21     | 4731.905663 | 0.237088189  | 0.093444359 | -2.537212436 | 0.011173913 | 0.048566989 |
| TBC1D5    | 3212.091064 | -0.551599319 | 0.217444873 | -2.536731776 | 0.011189265 | 0.048622249 |
| SEC14L1   | 5820.021817 | -0.283228268 | 0.111676433 | -2.536510728 | 0.011207848 | 0.048691522 |
| PP1A4C    | 2.65844094  | 2.33861432   | 0.920269017 | -2.536064335 | 0.011210614 | 0.048692057 |
| POLR3D    | 907.2755498 | 0.27447352   | 0.108238421 | -2.535823382 | 0.01121833  | 0.048702814 |
| ENDOG     | 1068.269992 | 0.462468543  | 0.184340755 | -2.535893909 | 0.01121608  | 0.048702814 |
| CRK       | 3313.622329 | 0.14023363   | 0.05534334  | -2.535600754 | 0.01123463  | 0.048772106 |
| TMEM160   | 2413.586298 | 0.603099038  | 0.237882443 | -2.535265029 | 0.011236228 | 0.048757346 |
| NR1D2     | 1617.907144 | -0.345351201 | 0.18422728  | -2.535110391 | 0.01124119  | 0.048764361 |
| XOR7      | 198.1184939 | 1.095816173  | 0.432266147 | -2.535049716 | 0.011243137 | 0.048764361 |
| DHS7      | 4177.257679 | 0.327706752  | 0.129279824 | -2.534863843 | 0.011249104 | 0.048776762 |
| FKBP11    | 614.6554217 | 0.39941358   | 0.157598841 | -2.534368767 | 0.011265011 | 0.048824763 |
| RPL37A    | 35860.79789 | 0.411310907  | 0.162292342 | -2.534382727 | 0.011264562 | 0.048824763 |
| LRRCL1    | 862.46783   | -0.42644644  | 0.168286163 | -2.534055273 | 0.011275095 | 0.048848456 |
| KRTAP5-5  | 1.729640401 | -1.475491175 | 0.582269683 | -2.534034003 | 0.011275779 | 0.048848456 |
| RICTOR    | 1647.06186  | -0.43853322  | 0.173076139 | -2.533758971 | 0.011286632 | 0.04887532  |
| BBM4      | 21.53274259 | -0.691246314 | 0.272801866 | -2.532948286 | 0.011310764 | 0.048976989 |
| NUBPL     | 489.437832  | -0.374564993 | 0.147836562 | -2.532835553 | 0.011314403 | 0.048981237 |
| TYW1      | 924.7712169 | -0.331076378 | 0.130777997 | -2.532559085 | 0.011323328 | 0.049008365 |
| UZF1E1    | 4007.772581 | -0.20382418  | 0.080486681 | -2.532396368 | 0.011328585 | 0.049019604 |
| ACD9706.2 | 55.93873622 | 0.806426645  | 0.31846342  | -2.532250574 | 0.011333297 | 0.049038481 |
| DYNCL12   | 8781.446288 | -0.336753038 | 0.133002943 | -2.531921704 | 0.011342932 | 0.049059262 |
| RO511     | 4360.557023 | -0.506612058 | 0.200940446 | -2.531869929 | 0.011345746 | 0.049059262 |
| SARNP     | 2229.757964 | 0.30077251   | 0.118804799 | -2.531652859 | 0.011352637 | 0.049075565 |
| ANOB      | 3660.496978 | -0.383305275 | 0.15141367  | -2.531510372 | 0.011357246 | 0.049085999 |
| TOR2A     | 707.4362566 | 0.276469979  | 0.10924882  | -2.530644991 | 0.011385302 | 0.049195716 |
| PDXN      | 1889.414127 | -0.585404592 | 0.23137552  | -2.530105999 | 0.011402807 | 0.049254519 |
| USP48     | 2743.263933 | -0.22008607  | 0.086888405 | -2.530061426 | 0.011404256 | 0.049254519 |
| BCL2L2    | 5989.567599 | -0.44876803  | 0.177403657 | -2.529605127 | 0.011419096 | 0.049303953 |
| NEK7      | 2965.735839 | -0.62097534  | 0.245488947 | -2.529545006 | 0.011421053 | 0.049303953 |
| CALCB     | 28.19686596 | 0.954760369  | 0.377338062 | -2.528911561 | 0.011441685 | 0.049358338 |
| LRRCL25   | 852.6365517 | 0.691207031  | 0.273316503 | -2.528961931 | 0.011440044 | 0.049358338 |
| CAPN10    | 1697.952068 | 0.273068001  | 0.107977297 | -2.529061107 | 0.011436811 | 0.049358338 |
| LDB1      | 2687.892111 | -0.754091187 | 0.29828072  | -2.528125809 | 0.011467325 | 0.049457365 |
| COIL      | 669.1702181 | 0.18503908   | 0.073195677 | -2.528005569 | 0.011471253 | 0.049462734 |
| MEF2B     | 253.0720632 | 0.744002137  | 0.29439172  | -2.527252134 | 0.011495887 | 0.049557359 |
| GALN17    | 1567.08773  | -0.433852276 | 0.171674661 | -2.527150631 | 0.011499217 | 0.04956012  |
| CCNF      | 309.8409567 | 0.670635925  | 0.26539967  | -2.526890578 | 0.011507735 | 0.049585235 |
| APP       | 46288.27974 | -0.396614073 | 0.156091149 | -2.526346714 | 0.011525567 | 0.049650463 |
| NSFL1C    | 5309.300949 | 0.23538677   | 0.09318092  | -2.526126756 | 0.011532803 | 0.049670021 |
| UBL5      | 6977.063292 | 0.399165155  | 0.158037099 | -2.525786882 | 0.011544547 | 0.049708384 |
| CKL16     | 5546.629597 | 0.577715689  | 0.228834735 | -2.524597886 | 0.011583074 | 0.049863227 |
| TOR1B     | 1171.308283 | 0.290197558  | 0.114955049 | -2.524443765 | 0.011588154 | 0.049873446 |
| SAXO2     | 112.0180693 | -0.533133409 | 0.211399278 | -2.523828778 | 0.011608445 | 0.049937451 |
| NIP2A     | 1822.271401 | 0.218691143  | 0.086648211 | -2.5238968   | 0.011606199 | 0.049937451 |
| MWP15     | 3690.319366 | 0.323216671  | 0.128072529 | -2.523700024 | 0.01161269  | 0.049944054 |
| PI3       | 531.919229  | 1.656404959  | 0.656416543 | -2.523405265 | 0.011622437 | 0.04997431  |
| USP53     | 1752.990848 | -0.397081309 | 0.157370809 | -2.523224065 | 0.011628428 | 0.049987771 |
| PTAFR     | 1643.869441 | 0.609254819  | 0.24146628  | -2.523146528 | 0.011630993 | 0.049987771 |

| NAME                                       | SIZE | ES     | NES       | NOM p-val   | FDR q-val   | FWER p-val | RANK AT MAX | LEADING EDGE     |
|--------------------------------------------|------|--------|-----------|-------------|-------------|------------|-------------|------------------|
| HALLMARK_P53_PATHWAY                       | 195  | 0.5515 | 2.9842005 | 0           | 0           | 0          | 2063        | tags=42%, list=1 |
| HALLMARK_OXIDATIVE_PHOSPHORYLATION         | 200  | 0.4791 | 2.6175818 | 0           | 0           | 0          | 2998        | tags=42%, list=1 |
| HALLMARK_TNFA_SIGNALING_VIA_NFKB           | 198  | 0.4707 | 2.5340328 | 0           | 0           | 0          | 3033        | tags=39%, list=1 |
| HALLMARK_MYC_TARGETS_V2                    | 58   | 0.5291 | 2.272414  | 0           | 0           | 0          | 2058        | tags=33%, list=1 |
| HALLMARK_REACTIVE_OXYGEN_SPECIES_PATHWAY   | 49   | 0.4948 | 2.1158695 | 0           | 0           | 0          | 3292        | tags=43%, list=1 |
| HALLMARK_INFLAMMATORY_RESPONSE             | 200  | 0.3763 | 2.0045283 | 0           | 0.001925926 | 0.002      | 2970        | tags=36%, list=1 |
| HALLMARK_DNA_REPAIR                        | 149  | 0.3662 | 1.889633  | 0           | 0.002303855 | 0.003      | 4395        | tags=42%, list=2 |
| HALLMARK_COAGULATION                       | 138  | 0.363  | 1.8870662 | 0           | 0.002015873 | 0.003      | 3451        | tags=36%, list=1 |
| HALLMARK_HYPOXIA                           | 197  | 0.3498 | 1.8562508 | 0           | 0.002559564 | 0.005      | 3627        | tags=34%, list=1 |
| HALLMARK_APOPTOSIS                         | 159  | 0.3336 | 1.7487315 | 0           | 0.003331323 | 0.009      | 2772        | tags=28%, list=1 |
| HALLMARK_UV_RESPONSE_UP                    | 156  | 0.3332 | 1.7478431 | 0           | 0.003028476 | 0.009      | 3926        | tags=36%, list=2 |
| HALLMARK_COMPLEMENT                        | 199  | 0.315  | 1.7045422 | 0           | 0.004497797 | 0.014      | 2304        | tags=28%, list=1 |
| HALLMARK_IL2_STATS_SIGNALING               | 199  | 0.3112 | 1.6965114 | 0           | 0.004749615 | 0.016      | 3181        | tags=31%, list=1 |
| HALLMARK_ADIPOGENESIS                      | 199  | 0.3065 | 1.6222962 | 0           | 0.008268605 | 0.033      | 2826        | tags=28%, list=1 |
| HALLMARK_XENOBIOTIC_METABOLISM             | 198  | 0.2926 | 1.5997667 | 0           | 0.008300723 | 0.036      | 2527        | tags=25%, list=1 |
| HALLMARK_GLYCOLYSIS                        | 197  | 0.2913 | 1.5712166 | 0           | 0.009666126 | 0.044      | 3292        | tags=27%, list=1 |
| HALLMARK_ESTROGEN_RESPONSE_LATE            | 198  | 0.2795 | 1.4800677 | 0           | 0.021792695 | 0.093      | 2994        | tags=24%, list=1 |
| HALLMARK_UNFOLDED_PROTEIN_RESPONSE         | 109  | 0.2884 | 1.4242083 | 0.010869565 | 0.031318847 | 0.142      | 4287        | tags=36%, list=2 |
| HALLMARK_ESTROGEN_RESPONSE_EARLY           | 198  | 0.2606 | 1.410954  | 0           | 0.032736376 | 0.153      | 3185        | tags=24%, list=1 |
| HALLMARK_MYC_TARGETS_V1                    | 195  | 0.2495 | 1.3491921 | 0.016129032 | 0.051919013 | 0.249      | 2925        | tags=22%, list=1 |
| HALLMARK_EPITHELIAL_MESENCHYMAL_TRANSITION | 196  | 0.2431 | 1.3273076 | 0.008       | 0.05723446  | 0.287      | 3245        | tags=27%, list=1 |
| HALLMARK_FATTY_ACID_METABOLISM             | 156  | 0.2546 | 1.3096892 | 0.020408163 | 0.05987752  | 0.307      | 3336        | tags=28%, list=1 |
| HALLMARK_IL6_JAK_STAT3_SIGNALING           | 85   | 0.2744 | 1.3091527 | 0.076576576 | 0.057472914 | 0.307      | 3801        | tags=34%, list=1 |
| HALLMARK_MTORC1_SIGNALING                  | 196  | 0.2398 | 1.259943  | 0.04        | 0.08433014  | 0.43       | 3367        | tags=21%, list=1 |
| HALLMARK_HEME_METABOLISM                   | 191  | 0.2258 | 1.1989383 | 0.107913665 | 0.1346032   | 0.61       | 3193        | tags=26%, list=1 |
| HALLMARK_PEROXISOME                        | 104  | 0.2353 | 1.1728563 | 0.13227513  | 0.15610808  | 0.679      | 1696        | tags=15%, list=9 |
| HALLMARK_APICAL_SURFACE                    | 44   | 0.2861 | 1.1696348 | 0.1696113   | 0.15290487  | 0.681      | 3371        | tags=27%, list=1 |
| HALLMARK_ANGIOGENESIS                      | 36   | 0.2974 | 1.159393  | 0.2027027   | 0.1613807   | 0.713      | 911         | tags=17%, list=5 |
| HALLMARK_KRAS_SIGNALING_UP                 | 199  | 0.2009 | 1.0790316 | 0.22689076  | 0.28989896  | 0.917      | 2128        | tags=15%, list=1 |
| HALLMARK_APICAL_JUNCTION                   | 200  | 0.187  | 0.9974    | 0.52755904  | 0.49565935  | 0.985      | 2773        | tags=19%, list=1 |
| HALLMARK_PI3K_AKT_MTOR_SIGNALING           | 104  | 0.1902 | 0.9272463 | 0.6782178   | 0.6878964   | 0.998      | 654         | tags=9%, list=3% |
| HALLMARK_PANCREAS_BETA_CELLS               | 40   | 0.1649 | 0.6593815 | 0.9640288   | 0.9910655   | 1          | 4680        | tags=33%, list=2 |

|                                     |     |         |            |             |            |       |                       |
|-------------------------------------|-----|---------|------------|-------------|------------|-------|-----------------------|
| HALLMARK_MITOTIC_SPINDLE            | 197 | -0.4399 | -1.9742376 | 0           | 4.00E-04   | 0.001 | 6009 tags=46%, list=3 |
| HALLMARK_UV_RESPONSE_DN             | 141 | -0.3397 | -1.4786652 | 0.003550296 | 0.08764573 | 0.33  | 6155 tags=42%, list=3 |
| HALLMARK_BILE_ACID_METABOLISM       | 112 | -0.3157 | -1.3349258 | 0.044665013 | 0.26472762 | 0.851 | 5115 tags=38%, list=2 |
| HALLMARK_WNT_BETA_CATENIN_SIGNALING | 42  | -0.3828 | -1.3206433 | 0.10661268  | 0.22642471 | 0.883 | 3634 tags=33%, list=1 |
| HALLMARK_G2M_CHECKPOINT             | 192 | -0.2799 | -1.2624408 | 0.068571426 | 0.30963138 | 0.976 | 9514 tags=63%, list=4 |
| HALLMARK_SPERMATOGENESIS            | 133 | -0.2886 | -1.2391869 | 0.0936019   | 0.31403098 | 0.989 | 5502 tags=29%, list=2 |
| HALLMARK_HEDGEHOG_SIGNALING         | 36  | -0.3601 | -1.2314923 | 0.18865249  | 0.28623465 | 0.99  | 6051 tags=31%, list=3 |
| HALLMARK_KRAS_SIGNALING_DN          | 198 | -0.2694 | -1.2235917 | 0.09568261  | 0.26729056 | 0.996 | 3240 tags=21%, list=1 |
| HALLMARK_E2F_TARGETS                | 198 | -0.2566 | -1.162008  | 0.16705069  | 0.37133558 | 1     | 9101 tags=56%, list=4 |
| HALLMARK_ALLOGRAFT_REJECTION        | 195 | -0.2595 | -1.1556926 | 0.18203034  | 0.3487454  | 1     | 3591 tags=26%, list=1 |
| HALLMARK_INTERFERON_ALPHA_RESPONSE  | 95  | -0.2823 | -1.1464889 | 0.217333668 | 0.33723947 | 1     | 2826 tags=26%, list=1 |
| HALLMARK_CHOLESTEROL_HOMEOSTASIS    | 73  | -0.2928 | -1.1434523 | 0.23859191  | 0.3146566  | 1     | 3589 tags=27%, list=1 |
| HALLMARK_NOTCH_SIGNALING            | 32  | -0.3292 | -1.1005156 | 0.31476322  | 0.3811923  | 1     | 6005 tags=47%, list=3 |
| HALLMARK_TGF_BETA_SIGNALING         | 53  | -0.2901 | -1.0831869 | 0.33380282  | 0.39424372 | 1     | 4485 tags=32%, list=2 |
| HALLMARK_PROTEIN_SECRETION          | 95  | -0.2463 | -0.9921578 | 0.47831476  | 0.5817538  | 1     | 7751 tags=54%, list=3 |
| HALLMARK_ANDROGEN_RESPONSE          | 98  | -0.24   | -0.9894925 | 0.4628205   | 0.5522625  | 1     | 6252 tags=38%, list=3 |
| HALLMARK_INTERFERON_GAMMA_RESPONSE  | 197 | -0.2158 | -0.9735866 | 0.5318656   | 0.55569273 | 1     | 5221 tags=32%, list=2 |
| HALLMARK_MYOGENESIS                 | 198 | -0.217  | -0.9722666 | 0.5411499   | 0.5270091  | 1     | 3484 tags=22%, list=1 |

|                 | pre-CED     | post-CED outside mask | post-CED inside mask |    |
|-----------------|-------------|-----------------------|----------------------|----|
| <b>snRNaseq</b> | gl_Pro1     | 4                     | 6                    | 0  |
|                 | gl_Pro2     | 5                     | 0                    | 0  |
|                 | gl_PN1      | 11                    | 5                    | 1  |
|                 | gl_PN2      | 6                     | 5                    | 4  |
|                 | gl_Mes1     | 2                     | 3                    | 2  |
|                 | gl_Mes2     | 7                     | 11                   | 14 |
|                 | AC_Neftel   | 3                     | 2                    | 3  |
| <b>scrNaseq</b> | G1/S_Neftel | 3                     | 1                    | 2  |
|                 | G2/M_Neftel | 7                     | 5                    | 0  |
|                 | MES1_Neftel | 1                     | 4                    | 9  |
|                 | MES2_Neftel | 5                     | 8                    | 2  |
|                 | NPC1_Neftel | 2                     | 0                    | 0  |
|                 | NPC2_Neftel | 5                     | 4                    | 5  |
|                 | OPC_Neftel  | 9                     | 6                    | 0  |

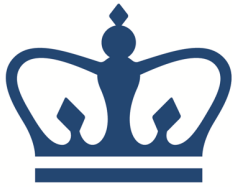

# COLUMBIA UNIVERSITY MEDICAL CENTER

**Herbert Irving Comprehensive Cancer Center  
Protocol**

**NCI·CC**

A Cancer Center Designated by the  
National Cancer Institute

**CUMC IRB#: AAAQ9520  
Version Date: 04/03/2019**

**TITLE: CHRONIC CONVECTION ENHANCED DELIVERY OF TOPOTECAN FOR  
RECURRENT HIGH GRADE GLIOMAS**

**Coordinating Center:** Columbia University Medical Center

**Principal Investigator:** Jeffrey Bruce, MD  
710 W. 168<sup>th</sup> St.  
4<sup>th</sup> floor, suite 434  
New York, NY 10032  
T: 212-305-7346  
F: 212-305-2026  
Jnb2@cumc.columbia.edu



**Columbia University Medical Center**  
**Herbert Irving Comprehensive Cancer Center**  
**Version Date: 04/03/2019**

**Co-Investigators:**

Peter Canoll, MD, PhD  
Irving Cancer Research Center  
Room 1001  
1130 St. Nicholas Avenue  
New York, NY 10032  
T: 212-851-4632  
F: 212-305-4548

Michael Sisti, MD  
710 W. 168th St.  
4th floor  
New York, NY 10032  
T: 212-305-7346  
F: 212-305-2026  
[mbs4@cumc.columbia.edu](mailto:mbs4@cumc.columbia.edu)

Guy McKhann II, MD  
710 W. 168th St  
4th floor  
New York, NY 10032  
T: 212-305-0052  
F: 212-305-2026  
[gm317@cumc.columbia.edu](mailto:gm317@cumc.columbia.edu)

Andrew Lassman, MD  
710 W. 168th St.  
9th floor  
New York, NY 10032  
T: 212-342-0571  
F: 212-342-1246  
[abl7@cumc.columbia.edu](mailto:abl7@cumc.columbia.edu)

Fabio Iwamoto, MD  
710 W. 168th St.  
9th floor  
New York, NY 10032  
T: 212-342-0571  
F: 212-342-1246  
[fi2146@cumc.columbia.edu](mailto:fi2146@cumc.columbia.edu)

Teri Kreisl  
710 W. 168th St.  
9th floor  
New York, NY 10032

**Columbia University Medical Center  
Herbert Irving Comprehensive Cancer Center  
Version Date: 04/03/2019**

T: 212-342-0571  
F: 212-342-1246  
[tnk2109@cumc.columbia.edu](mailto:tnk2109@cumc.columbia.edu)

Mary Welch  
710 W. 168th St.  
9th floor  
New York, NY 10032  
T: 212-342-0571  
F: 212-342-1246  
[mw2517@cumc.columbia.edu](mailto:mw2517@cumc.columbia.edu)

Aya Haggiagi  
710 W. 168th St.  
9th floor  
New York, NY 10032  
T: 212-342-0571  
F: 212-342-1246  
[amh2237@cumc.columbia.edu](mailto:amh2237@cumc.columbia.edu)

**Statistician:**

Wei-Yann Tsai, PhD  
722 W. 168th St.  
R6-26D  
T: 212-305-9402  
[wt5@columbia.edu](mailto:wt5@columbia.edu)

**Columbia University Medical Center  
Herbert Irving Comprehensive Cancer Center  
Version Date: 04/03/2019**

|                            |                                                                                                                                                                             |
|----------------------------|-----------------------------------------------------------------------------------------------------------------------------------------------------------------------------|
| <b>Regulatory Sponsor:</b> | Jeffrey Bruce, MD<br>710 W. 168 <sup>th</sup> St.<br>4 <sup>th</sup> floor, suite 434<br>New York, NY 10032<br>T: 212-305-7346<br>F: 212-305-2026<br>jnb2@cumc.columbia.edu |
| <b>Funding Source:</b>     | NIH/NCI<br>National Institutes of Health<br>9000 Rockville Pike<br>Bethesda, Maryland 20892<br>301-496-4000                                                                 |
| <b>Study Agent:</b>        | Topotecan                                                                                                                                                                   |
| <b>Other Agent:</b>        | Gadolinium                                                                                                                                                                  |
| <b>IND Status:</b>         | <b>IND #:</b> 131889<br><b>IND Sponsor:</b> Jeffrey Bruce, MD                                                                                                               |

**Affiliate Institutions:**

| <b>Site Principal Investigator and Contact Information:</b>                                                                                                                                                                                         | <b>Other Investigators at Site</b>                                                                                                                                   |
|-----------------------------------------------------------------------------------------------------------------------------------------------------------------------------------------------------------------------------------------------------|----------------------------------------------------------------------------------------------------------------------------------------------------------------------|
| Columbia University Medical Center<br><b>Principal Investigator:</b><br>Jeffrey Bruce, MD<br>710 W. 168 <sup>th</sup> St.<br>4 <sup>th</sup> floor, suite 434<br>New York, NY 10032<br>T: 212-305-7346<br>F: 212-305-2026<br>Jnb2@cumc.columbia.edu | Peter Canoll, MD, PhD<br>Michael Sisti, MD<br>Guy McKhann II, MD<br>Andrew Lassman, MD<br>Fabio Iwamoto, MD<br>Teri Kreisl, MD<br>Mary Welch, MD<br>Aya Haggiagi, MD |

**Initial version:** 08/2/2016  
**Amended:** 12/12/2016  
**Amended:** 1/12/2017  
**Amended:** 4/7/2017  
**Amended:** 9/12/2017  
**Amended:** 12/14/2017  
**Amended:** 3/13/2018

**Columbia University Medical Center  
Herbert Irving Comprehensive Cancer Center  
Version Date: 04/03/2019**

Amended: 9/20/2018  
**Amended: 10/15/2018**  
**Amended: 11/01/2018**  
**Amended: 04/03/2019**

**Protocol Signature Page**

I confirm that I have read this protocol, I understand it, and I will work according to this protocol and to the ethical principles stated in the latest version of the Declaration of Helsinki, the applicable ICH guidelines for good clinical practices, and the applicable federal, state, and local laws, rules, and regulations relating to the conduct of the protocol. I have read and understand the information in the Investigators' Brochure (or Manufacturer's Brochure) regarding the risks and potential benefits. I will promptly submit the protocol to the applicable IRB for review and approval. Once the protocol has been approved by the IRB, I understand that any modification made during the course of the study must first be approved by the IRB, prior to implementation except when such modification is made to remove an immediate hazard to the subject. I certify that I, and the study staff, have received the requisite training to conduct this research protocol. I agree to maintain adequate and accurate records in accordance with Columbia University and Herbert Irving Comprehensive Cancer Center policies, Federal, state and local laws and regulations. I agree to maintain the confidentiality of all information received or developed in connection with this protocol.

Instructions to Principal Investigator: Sign and Date this signature page and print your name.  
Return the original, completed and signed to the Clinical Protocol & Data Management Office.  
Retain a copy in the regulatory binder.

\_\_\_\_\_  
Signature of Principal Investigator

\_\_\_\_\_  
Date

\_\_\_\_\_  
Principal Investigator Name (Print)

\_\_\_\_\_  
Name of Institution

**Protocol Synopsis**

|                                              |                                                                                                                                                                                                                                                                                                                                                                                                                                                                                                                                                                                                                                                                                                                                                                                                                                                                                               |
|----------------------------------------------|-----------------------------------------------------------------------------------------------------------------------------------------------------------------------------------------------------------------------------------------------------------------------------------------------------------------------------------------------------------------------------------------------------------------------------------------------------------------------------------------------------------------------------------------------------------------------------------------------------------------------------------------------------------------------------------------------------------------------------------------------------------------------------------------------------------------------------------------------------------------------------------------------|
| <b>Title</b>                                 | Chronic Convection Enhanced Delivery of Topotecan for Recurrent High Grade Gliomas                                                                                                                                                                                                                                                                                                                                                                                                                                                                                                                                                                                                                                                                                                                                                                                                            |
| <b>Short Title</b>                           | Chronic TPT CED for Recurrent HGG                                                                                                                                                                                                                                                                                                                                                                                                                                                                                                                                                                                                                                                                                                                                                                                                                                                             |
| <b>Protocol Number</b>                       | AAAQ9520                                                                                                                                                                                                                                                                                                                                                                                                                                                                                                                                                                                                                                                                                                                                                                                                                                                                                      |
| <b>Phase</b>                                 | Phase Ib                                                                                                                                                                                                                                                                                                                                                                                                                                                                                                                                                                                                                                                                                                                                                                                                                                                                                      |
| <b>Methodology</b>                           | Open label                                                                                                                                                                                                                                                                                                                                                                                                                                                                                                                                                                                                                                                                                                                                                                                                                                                                                    |
| <b>Study Duration</b>                        | 5 years                                                                                                                                                                                                                                                                                                                                                                                                                                                                                                                                                                                                                                                                                                                                                                                                                                                                                       |
| <b>Study Center(s)</b>                       | Single center                                                                                                                                                                                                                                                                                                                                                                                                                                                                                                                                                                                                                                                                                                                                                                                                                                                                                 |
| <b>Objectives</b>                            | The aim of this study is to assess safety of chronic TPT CED in patients with recurrent high grade glioma (WHO grade III-IV), and to characterize the drug's intracerebral distribution using an innovative, non-invasive methodology.                                                                                                                                                                                                                                                                                                                                                                                                                                                                                                                                                                                                                                                        |
| <b>Number of Subjects</b>                    | 5 Evaluable                                                                                                                                                                                                                                                                                                                                                                                                                                                                                                                                                                                                                                                                                                                                                                                                                                                                                   |
| <b>Diagnosis and Main Inclusion Criteria</b> | Patients with recurrent high grade glioma (WHO grade III-IV).                                                                                                                                                                                                                                                                                                                                                                                                                                                                                                                                                                                                                                                                                                                                                                                                                                 |
| <b>Study Product, Dose, Route, Regimen</b>   | ~20 mL of 146 uM topotecan with 1:100 gadolinium by chronic pulsatile intracerebral convection enhanced delivery.                                                                                                                                                                                                                                                                                                                                                                                                                                                                                                                                                                                                                                                                                                                                                                             |
| <b>Duration of administration</b>            | Approximately 23-29 days                                                                                                                                                                                                                                                                                                                                                                                                                                                                                                                                                                                                                                                                                                                                                                                                                                                                      |
| <b>Reference therapy</b>                     | Standard reference therapy: temozolomide, radiation                                                                                                                                                                                                                                                                                                                                                                                                                                                                                                                                                                                                                                                                                                                                                                                                                                           |
| <b>Statistical Methodology</b>               | Clinical toxicity (defined by a serious adverse event) is projected to be $\leq 5\%$ at approximately 23-29 days. A clinical toxicity rate that exceeds 20% will be considered unacceptable for this procedure. We will use a truncated Sequential Probability Ratio Test (SPRT) to determine whether the rate of toxicity exceeds our target. We will use correlation analysis to determine the relationship between gadolinium signal intensity and distribution on MRI and the direct measurement of TPT levels. The power calculations are framed to assess our ability to detect these correlations. Since volume of distribution is determined by infusion rate once equilibrium is achieved (within the first 24-48 hours), we do not expect to see a difference in overall volume of distribution at the end of each pulse. We will verify the lack of change with a t-test analysis. |

**Protocol Schema:**

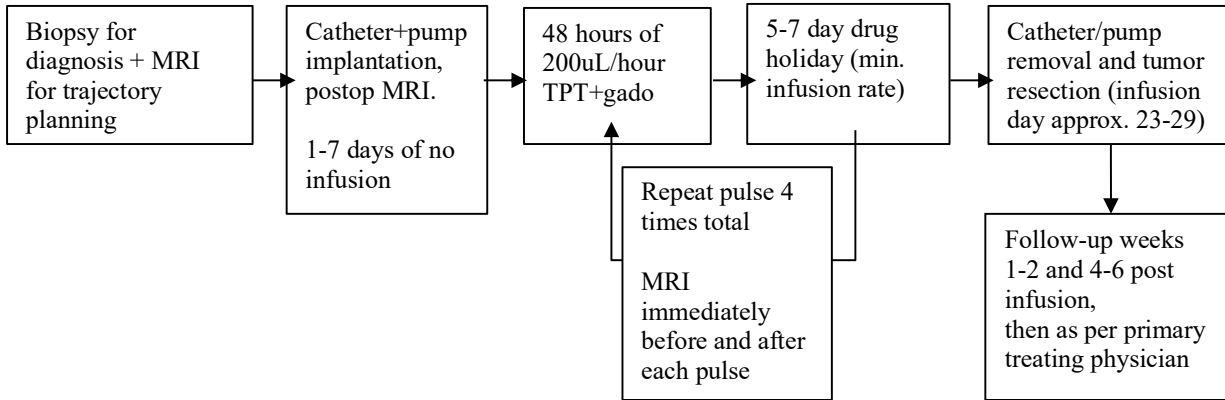

**Contents**

Protocol Signature Page.....5

1. Introduction.....11

2. Study Objectives .....11

    2.1 Primary Objective .....11

    2.2 Secondary Objective .....11

3. Background.....11

4. Investigational Agent.....12

    4.1 Preclinical Data.....13

    4.2 Clinical Data to Date.....14

    4.3 Other Agent(s) .....15

5. Study Design.....18

    5.1 General:.....18

    5.2 Primary Study Endpoints: .....18

    5.3 Design .....18

    5.4 Dose Modifications:.....**Error! Bookmark not defined.**

    5.5 Dose Limiting Toxicities .....**Error! Bookmark not defined.**

    5.6 Number of Patients .....23

6. Subject Selection and Withdrawal .....24

    6.1 Inclusion Criteria/Eligibility Requirements .....24

    6.2 Exclusion Criteria .....25

    6.3 Inclusion of Women and Minorities .....25

    6.4 Subject Recruitment.....25

    6.5 Early Withdrawal of Subjects .....26

7. REGISTRATION PROCEDURES .....27

    7.1 CUMC Research Participant Registration .....27

8. TREATMENT PLAN.....28

    8.1 Agent Administration.....29

    8.2 General Concomitant Medication and Supportive Care Guidelines.....37

    8.3 Duration of Therapy.....38

    8.4 Duration of Follow Up.....38

    8.5 Criteria for Removal from Study .....38

9. DOSING DELAYS/DOSE MODIFICATIONS .....38

10. ADVERSE EVENTS: LIST AND REPORTING REQUIREMENTS .....38

    10.1 Adverse events.....38

    10.2 Definitions.....47



**Columbia University Medical Center**  
**Herbert Irving Comprehensive Cancer Center**  
**Version Date: 04/03/2019**

|       |                                                                 |    |
|-------|-----------------------------------------------------------------|----|
| 10.3  | Recording of Adverse Events .....                               | 50 |
| 10.4  | Reporting of Serious Adverse Events .....                       | 50 |
| 10.5  | Reporting Process .....                                         | 52 |
| 11    | PHARMACEUTICAL INFORMATION.....                                 | 52 |
| 11.1  | Description.....                                                | 52 |
| 11.2  | Treatment Regimen.....                                          | 52 |
| 11.3  | Method for Assigning Subjects to Treatment Groups .....         | 52 |
| 11.4  | Preparation and Administration of Study Drug .....              | 53 |
| 11.5  | Subject Compliance Monitoring.....                              | 53 |
| 11.6  | Prior and Concomitant Therapy.....                              | 53 |
| 11.7  | Packaging.....                                                  | 53 |
| 11.8  | Blinding of Study Drug.....                                     | 53 |
| 11.9  | Receiving, Storage, Dispensing and Return .....                 | 53 |
| 11.10 | Other Agent(s) .....                                            | 54 |
| 12    | STUDY CALENDAR .....                                            | 54 |
|       | MEASUREMENT OF EFFECT .....                                     | 61 |
| 13.1  | Antitumor Effect – Solid Tumors .....                           | 61 |
| 13.2  | Disease Parameters .....                                        | 61 |
| 13.3  | Methods for Evaluation of Measurable Disease .....              | 61 |
| 13.4  | Response Criteria .....                                         | 62 |
| 13.4  | Duration of Response.....                                       | 62 |
| 13.5  | Progression-Free Survival (PFS) and Overall Survival (OS) ..... | 62 |
| 13.6  | Other Response Parameters .....                                 | 63 |
| 13.8  | Stopping Rules.....                                             | 63 |
| 14    | DATA REPORTING / REGULATORY REQUIREMENTS.....                   | 63 |
| 14.1  | Data Collection .....                                           | 63 |
| 14.2  | Data Reporting.....                                             | 63 |
| 14.3  | Data and Safety Monitoring Committee.....                       | 64 |
| 14.4  | Quality Control and Quality Assurance.....                      | 64 |
| 14.5  | Confidentiality .....                                           | 65 |
| 14.6  | Source Documents .....                                          | 65 |
| 14.7  | Case Report Forms.....                                          | 66 |
| 14.8  | Records Retention.....                                          | 66 |
| 15    | STATISTICAL CONSIDERATIONS.....                                 | 66 |
| 15.1  | Study Design/Endpoints .....                                    | 66 |
| 15.2  | Size/Accrual Rate.....                                          | 66 |
| 15.3  | Stratification Factors.....                                     | 67 |
| 15.4  | Analysis of Secondary Endpoints .....                           | 67 |
| 15.5  | Reporting and Exclusions .....                                  | 68 |
| 16    | Protection of Human Subjects .....                              | 69 |

**Columbia University Medical Center  
Herbert Irving Comprehensive Cancer Center  
Version Date: 04/03/2019**

|    |                                                   |    |
|----|---------------------------------------------------|----|
| 17 | Publication Plan .....                            | 69 |
| 18 | References.....                                   | 69 |
| 19 | Appendix A – Study Calendar .....                 | 0  |
| 20 | Appendix B – Chronological Study Procedures ..... | 0  |
| 21 | Appendix C- MRI Procedures.....                   | 0  |

## **1. INTRODUCTION**

This document is a protocol for a human research study. This study is to be conducted according to U.S. and international standards of Good Clinical Practice (FDA Title 21 part 312 and International Conference on Harmonization guidelines), applicable government regulations, and Columbia University Medical Center institutional research policies and procedures.

## **2. STUDY OBJECTIVES**

### 2.1 Primary Objective

The primary goal of this study is to establish, for the first time, safety of prolonged intracerebral convection enhanced delivery of chemotherapy in patients with recurrent high grade glioma (WHO grade III-IV).

### 2.2 Secondary Objective

Secondary objectives will include determination of TPT distribution and radiographic tumor response with prolonged intracerebral CED.

## **3. BACKGROUND**

Malignant gliomas are among the most pernicious of human tumors. They are locally invasive and universally recurrent, with recurrence usually occurring within two centimeters of the original resection cavity. Although numerous chemotherapeutic drugs demonstrate significant anti-tumor activity in preclinical studies, their efficacy in clinical trials has been dismal because systemic delivery fails to achieve therapeutic drug levels in tumor cells due to various factors including limited blood-brain barrier permeability and systemic toxicity. Convection-enhanced delivery (CED) is a method of regional drug delivery that circumvents this problem. We have shown in a phase 1 clinical trial that a potent topoisomerase inhibitor, topotecan (TPT), can be safely and effectively delivered by CED into patients with recurrent malignant gliomas[1]. Our current proposal will expand on these clinical results to address two current limitations to the clinical application of CED: 1) A reliable method for non-invasively monitoring drug distribution throughout the tumor and brain does not exist; and 2) Duration of CED therapy has been limited to short-term infusions secondary to the use of externalized infusion pumps. We hypothesize that extended chronic pulsatile local-regional delivery of TPT is safe, effective and feasible in patients with recurrent gliomas. To test this hypothesis, we will optimize the ability to chronically deliver TPT directly into the tumor and surrounding brain by CED through subcutaneously implanted pumps while innovating a methodology for monitoring the drug distribution through non-invasive imaging. This strategy will overcome the limitations of chemotherapy as currently used in the treatment of gliomas, and may be applicable to other CNS diseases currently limited by drug delivery barriers.

The aim of this study is to implement chronic pulsatile CED of TPT in patients with recurrent high

grade glioma (HGG) (WHO grade III-IV) and characterize the drug's distribution using an innovative, non-invasive methodology for measuring intracerebral distribution of TPT.

**Hypothesis:** TPT can be safely, effectively and chronically infused into recurrent HGG patients via intracerebral CED, and drug distribution can be accurately measured non-invasively. The chronic CED and non-invasive imaging methodology developed in our pig model[2] will require validation in recurrent HGG patients where a significantly more complex experimental environment exists. Patients with recurrent HGGs will undergo implantation of CED catheters and subcutaneously implanted pumps through which 4 cycles of TPT/gadolinium CED will be administered. These cycles will include 48 hours of active drug infusion followed by 5-7 days of drug holiday. Following the four cycles, catheters and pumps will be removed, and tumors will be resected. Tumoral and parenchymal distribution of gadolinium measured through MRI will be correlated with TPT levels measured by mass spectrophotometry of tissue samples obtained upon tumor resection. Cytotoxic response to TPT will be investigated by histological comparison of tissue samples taken at resection versus initial biopsy and by MRI.

At the conclusion of these studies, the expected outcome will be a novel, measurable strategy to treat recurrent HGG patients with chronically delivered high doses of TPT directly into their tumors, thereby avoid the limitations imposed by conventional systemic delivery. On a broader level, we will have demonstrated, for the first time in humans, the ability to chronically achieve a local-regional distribution of a drug directly into the brain parenchyma.

#### **4. INVESTIGATIONAL AGENT**

##### Topotecan (TPT)

Our choice of TPT for this study is based on a preponderance of animal and human data demonstrating its safety and efficacy with CED[2-5]. Because of the inherent advantage of CED over systemic delivery, many different drugs could be successfully substituted for TPT in this proposal. However, TPT is the ideal candidate because it has been validated in clinical trials[3], shown to be the most effective drug compared to over 20 other drugs in our rat glioma model[4, 6-8], and is easily measurable in tumor and brain tissue[4]. TPT, a camptothecin analog inhibitor of topoisomerase 1, is suitable for the treatment of malignant brain tumors as it is cytotoxic to proliferating glioma cells but remains relatively innocuous to normal brain where topoisomerase levels are low[4]. Although TPT had potent anti-neoplastic effects in preclinical models of glioma, it failed to show appreciable effects in glioma patients when delivered systemically[9]. However, CED of TPT proved to be safe and showed surprising efficacy in our recent phase 1 trial indicating that more effective therapy is possible when limitations to systemic delivery are overcome[3]. In this phase 1 study, TPT was administered through an externalized catheter and external micro infusion pump. As such, the treatment period was limited to four days to minimize hospital time and the risk of infection in this externalized system. However, a compelling rationale for pursuing chronic CED of TPT in clinical trials was provided by our rat glioma studies that demonstrated increased survival when TPT was delivered for longer periods of time[5]. Based on these studies, we hypothesized that prolonged CED of TPT would enhance its therapeutic effect in patients with malignant gliomas.

The infusate will consist of gadolinium plus TPT (146 uM) with the TPT dosage based on the results of our phase I clinical trial where a maximum tolerated dose of 218uM was established after 4 days of treatment[3]. Our choice of 146 uM is the next lower level tested in the phase I trial. Although no toxicity was seen at 218 uM, a lower dose is desirable to decrease the likelihood of toxicity during longer infusion durations.

Although we hope to gain information on the efficacy of this drug in treating malignant brain tumors, there may or may not be benefit from taking part in this study.

The tumors being studied are highly malignant and rapidly fatal. The major risks of this therapy are the direct effects of the topotecan and the infusion technique which may exacerbate increased intracranial pressure. These risks have been well-tolerated in preclinical animal and phase I human studies. The monitoring strategy outlined in the protocol is designed to minimize complications associated with these risks. There are no proven alternative therapies for patients with recurrent HGG who have failed radiation and temozolomide chemotherapy.

#### 4.1 Preclinical Data

In the previous phase I study, TPT was administered through an externalized catheters and external microinfusion pumps, and the treatment period was limited to four days to minimize hospital time and the risk of infection in this externalized system. However, preclinical rat glioma studies have demonstrated increased survival when TPT was delivered for longer periods of time[5]. This finding provides a compelling rationale for pursuing chronic exposure to TPT CED in clinical trial. This finding likely relates to topotecan's mechanism of action, which is cell cycle dependent. Thus, when cells are exposed to topotecan at multiple time points, more cells will have likely passed through the appropriate phase of the cycle for topotecan to take action. We hypothesize that prolonged duration of TPT CED will enhance its therapeutic effect in malignant glioma patients. We have evaluated the feasibility of short term and prolonged TPT administration by CED in a large porcine animal model by using a subcutaneous implantable pump, the same pump that will be used for the current study. 136 uM TPT with gadodiamide (28.7 mg/mL) were first administered for either 3 day or 10 days using the Medtronic Synchroned-II pumps[2]. In another set of preclinical porcine experiments, similar infusions were administered for between 3-32 days (see study report). Pigs underwent MRI imaging at various time points throughout the treatment period. Areas of enhancement were analyzed and volumes of distribution (Vd) were calculated. CED of TPT/gadolinium was well tolerated for the 3 day, 10 day, and the 32 day infusions. No animals showed evidence of significant neurological deficit or systemic toxicity throughout either the short-term or long-term infusions. In the long-term infusions, maximum enhancement volume was typically reached by day three or four, with the largest gains in volume of distribution occurring within the first 48 hours of infusion (see study report). Furthermore, the volume of distribution reached a plateau at a medium volume of infusion of 14.25 mL during the 10-day course. During 32 day infusions, volume of distribution declined from max distribution as steady state was achieved. In these long-term infusions, anticipated local MRI signal change was seen at the catheter tip likely representing local tissue changes in response to infusion. Again, such radiographic changes were not associated with neurological deficit or evidence of toxicity.

The study investigators recognize that the tissue properties of normal pig brains are not

necessarily completely representative of human high grade glioma tissue. Due to tumor hypercellularity and peritumoral edema, it is possible that tumor tissue in these patients is less compliant than normal brain tissue. Such a decrease in compliance has the potential to affect the delivery of drugs via convection, as it will subject the catheter tip and infusion system to variable pressures. This difference in compliance may represent a distinct change from the type of tissue compliance that was encountered in preclinical porcine studies. Yet, this difference does not pose a problem for this study. In fact, one of the aims of this study is specifically to understand the nature of CED flow dynamics in the context of a variably compliant brain tumor. Given the fact that high grade gliomas are heterogeneous tumors with areas of variable cellularity, drugs delivered via CED are likely to flow down the path of least resistance out of the tumor and into peritumoral white matter tracts. Such tendency for CED to flow down white matter tracts is suggested by our preclinical porcine work described above, as these tracts represent the paths of least resistance to flow. In clinical application, drug will, thus, be able to reach diffusely infiltrative tumor cells in more normal, and likely more compliant white matter. These diffusely infiltrative cells are the ones that are typically left behind in brain tumor resection and account for tumor recurrence. As such, these cells are specifically the target of CED therapy. Since our protocol includes serial MRI throughout the infusion, the assessment of CED dynamics and likely proclivity of CED fluids to follow white matter tracts can thus be assessed.

#### 4.2 Clinical Data to Date

We have previously performed a phase 1b, open label, nonrandomized, dose escalation study employing CED of TPT in patients with recurrent WHO grade III anaplastic astrocytoma or glioblastoma[1]. CED was performed for 100 hours using a Medfusion 2010 external syringe pump. This phase 1b study had the following enrollment and study results:

|                                                           |    |
|-----------------------------------------------------------|----|
| Total Enrollment                                          | 18 |
| Total Completed Treatment                                 | 18 |
| Patients Still Active on Treatment                        | 0  |
| Patients Completed Treatment Still in Long-term Follow-up | 0  |
| Completed Protocol Follow-up                              | 17 |
| Withdrew Consent Prior to Completing Follow-up            | 1  |
| Termination associated with an adverse experience         | 0  |

Of the 18 adult patients studied, 1 remains alive at 347 weeks post-treatment, but has withdrawn consent and is no longer in follow-up, as of March 11, 2015. Survival ranged from 13 to 524 weeks with a median overall survival of 60 weeks. Progression-free survival ranged from 4 to 347 weeks with median progression-free survival of 23 weeks. The 6-month progression-free survival and 6-month overall survival were 44% and 75%, respectively. 6-month progression-free survival in the group of patients with GBM was 55%. One patient, due to his unrelated death not long after his treatment (see below), was not evaluable for treatment response, and was censored from future analyses. The serum concentrations of active and inactive forms of TPT were undetectable

(<0.5ng/mL) at all time points in all patients. At 1 week after infusion 1 patient had grade 1 leukopenia, and 1 patient had grade 2 thrombocytopenia, both of which resolved by week 2 with no adverse sequelae. There were two dose limiting toxicities (DLT) seen at the highest dose (0.133mg/mL). The first patient experienced a dose limiting toxicity (DLT) manifested by a right parietal syndrome with dysmetria and hemineglect. Treatment was terminated after 3.53 mg of infusion, and symptoms partially improved. This patient also suffered DVT, which was deemed unrelated to topotecan infusion. Another patient treated with the highest TPT concentration developed a transient DLT consisting of left upper extremity weakness, which resolved spontaneously. A patient with history of systemic chemotherapy, bone marrow transplant, and seizure disorder was readmitted 7 weeks after infusion with worsening of seizure disorder and severe metabolic disarray. This patient ultimately suffered cardiac arrest and died; autopsy was notable for aspergillus pneumonitis. This mortality was thus deemed unlikely to be related to the local topotecan therapy. In addition to the above severe events, seizure, headache, fatigue, or worsening hemiparesis each occurred in 5 patients (31%). GI symptoms or back/extremity pain were both seen in 4 patients (25%). 3 patients (19%) experienced either DVT, pneumonia, aphasia, memory impairment/confusion, or urinary symptoms. Right hand dyscoordination, poor wound healing, thrombocytopenia/leukopenia, dizziness, or anxiety/depression were each seen in 2 patients (13%). ICH (intratumoral hemorrhage >1 month following infusion), dry gangrene, upper extremity weakness, right parietal syndrome, tremor, rash, thrush, or sinusitis were each seen in individual patients (6%). The Average Karnofsky performance score before treatment was 84 and after treatment was 83. Except for the 2 patients experiencing DLTs, all patients remained ambulatory following infusion. No significant changes were seen in Cognitive Stability Index or the Physical or Mental Quality of Life assessments. Thus, all quality of life and neurocognitive testing verified the safety and tolerability of the treatment. Overall, this study suggested that TPT by CED has antitumor activity at concentrations that are non-toxic to the normal brain.

#### 4.3 Other Agent(s) Gadolinium (gado)

Prior work has established the utility of using diffusion-weighted MRI[10, 11], T2-weighted MRI[12] and dynamic-contrast enhanced MRI[13] among other modalities to determine the intraparenchymal volume of distribution (Vd) of drugs administered via CED. Intracerebral co-infusion of gadolinium with therapeutic compounds via CED is a delivery paradigm that offers real-time assessment of the volume of drug distribution. Additionally, co-infusion of gadolinium contrast is significantly less complex to implement than other direct imaging tracer-drug labeling strategies, such as liposomes or radio-labeled compounds. The technical and economic complexities of these other imaging approaches create significant limitations in human multi-center clinical trials involving numerous patients. Gadolinium is a widely available MRI contrast agent that is used routinely in clinical practice via IV administration, especially for imaging of intracranial tumors. In addition, to IV administration, there have been investigation of use of gadolinium in intraparenchymal convection enhanced delivery. The volume of distribution of gadolinium can be easily visualized and quantified on T1 weighted MRI, and several studies[10, 14-18], including both animal and human trials[2, 5, 17-22] have shown that intracerebral infusion of gadolinium compounds are safe and well tolerated. Pre-clinical animal studies have

demonstrated that gadolinium is safe in long-term chronic co-infusion up to 6 weeks[14, 15]. In our previous long-term CED in porcine models, gadolinium was utilized without toxicity issues [2], including in infusions of up to 32 days. Gadolinium has thus been employed in many previous CED studies with promising results, and can be safely used in this study.

The interactions between topotecan and gadolinium have been evaluated, and no concerning interactions have been identified. During our porcine trial, gadolinium was included in all infusions. Characteristic hyperintense T1 gadolinium signal was appreciated on all MRIs performed, suggesting that gadolinium's imaging properties are retained despite presence of topotecan. MTS assays were performed on human U87 glioma cell lines in which cytotoxic efficacy of 146uM topotecan both with and without 1:100 gadolinium were assessed. In comparison to nutrient rich media without drug, both the TPT-alone and TPT-gadolinium treated cells demonstrated a statistically significant reduction in glioma cell density ( $p < 0.01$  for both). However, no difference in cytotoxicity was seen when the TPT-alone and TPT-gadolinium treated cells were compared ( $p = 0.48$ ; see study report). TPT, therefore, retains its anti-tumoral activity at 48 hours despite the presence of gadolinium.

Implanted pumps:

**Synchromed II:**

- 1) **PMA/510(k) number:** P860004
- 2) **Model Number:** Model 8637-20
- 3) **Indication for Use**
  - a. **Approved:** "Chronic intraspinal (epidural and intrathecal) infusion of preservative-free morphine sulfate sterile solution in the treatment of chronic intractable pain, chronic intrathecal infusion of preservative-free ziconotide sterile solution for the management of severe chronic pain, and chronic intrathecal infusion of Lioresal® Intrathecal (baclofen injection) for the management of severe spasticity; chronic intravascular infusion of floxuridine (FUDR) or methotrexate for the treatment of primary or metastatic cancer. Outside of US: Chronic infusion of drugs or fluids tested as compatible and listed in the product labeling." [23]
  - b. **Proposed:** Chronic intracerebral infusion of topotecan-gadolinium for patients with recurrent high grade glioma.
- 4) **Administration routes/drugs**
  - a. **Approved:**
    - i. **Drugs:** Morphine sulfate, Baclofen, Ziconotide, Floxuridine, Methotrexate
    - ii. **Routes:** Epidural, Intrathecal, Intravascular
  - b. **Proposed:**
    - i. **Drugs:** Topotecan, gadolinium
    - ii. **Route:** Intracerebral (intratumoral)
- 5) **Critical Performance Attributes**
  - i. **Approved:** Flow rates: 0.048mL/day-24mL/day





reach diffusely infiltrative tumor cells in more normal, and likely more compliant white matter. These diffusely infiltrative cells are the ones that are typically left behind in brain tumor resection and account for tumor recurrence. As such, these cells are specifically the target of CED therapy. Since our protocol includes serial MRI throughout the infusion, the assessment of CED dynamics and likely proclivity of CED fluids to follow white matter tracts can thus be assessed.

It is possible that in cases of extreme brain non-compliance, there will be obstruction to drug delivery through the catheter. This situation is unlikely as even elevated intracerebral pressures are relatively low. But, if pressures did become high enough to occlude the infusion system, this event would serve as a fail-safe, preventing excess fluid from entering the noncompliant brain. Since patients will be monitored continuously throughout active infusions, any clinical sign of increase ICP will be acted on immediately by urgent discontinuation of drug infusion, use of steroids, hypertonics, mannitol, and possible surgical intervention if necessary.

## **5. STUDY DESIGN**

### **5.1 General:**

Allocation: Non-randomized  
Endpoint Classification: Safety/Efficacy Study  
Intervention Model: Parallel Assignment  
Masking: Open Label  
Primary Purpose: Treatment

### **5.2 Primary Study Endpoints:**

The primary endpoint of this study is assessment of safety of chronic pulsatile intracerebral topotecan infusion. Safety will be assessed by evaluation of physical and neurologic examinations, laboratory studies, radiographic studies, and by adverse events. An adverse event is any new or worsening symptom or clinical finding which occurs during the study period (see section 10). Adverse events are to be recorded irrespective of causality, on the adverse events form. Each event will be described by its severity (mild, moderate, severe, life-threatening), duration, and relation to study medication (unrelated, unlikely, possible, probable, definite). Additional secondary endpoints that will be assessed are steady state volume of drug distribution as measured on volumetric MRI, correlation of intraparenchymal TPT concentration with contrast enhancement intensity on MRI, as well as time to tumor progression/recurrence, and time to death.

### **5.3 Design**

This is a **phase Ib** open label non-randomized trial. See schema below. All times indicated are optimal but should be considered approximate.

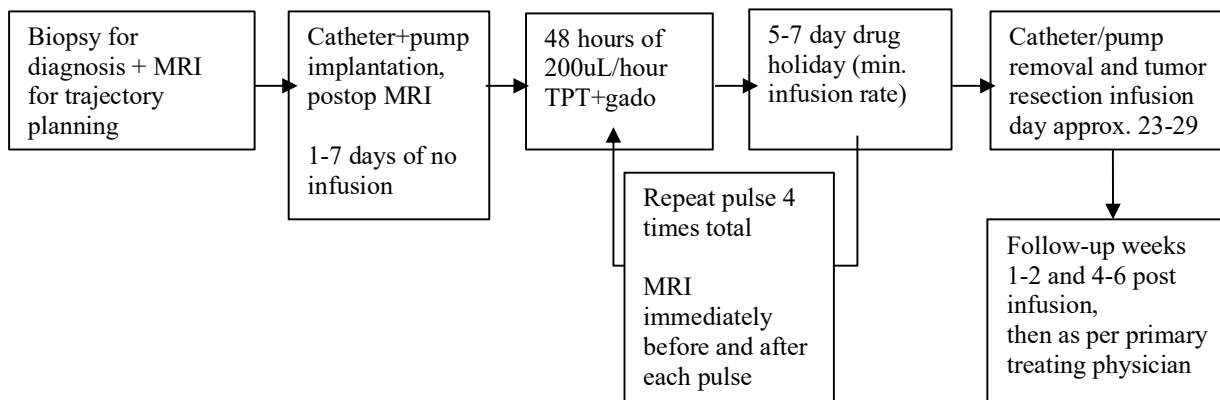

For effective clinical translation, the correlations between drug distribution and non-invasive imaging established in a pig model must be validated in humans with GBM[2]. Although drug infusions into normal pig brain serve as a convenient model for establishing these correlations, they must be re-calibrated in the significantly more complex intracerebral environment of patients with HGG. A series of 5 patients with recurrent HGGs will be recruited for a study in which TPT and gado will be co-delivered by CED via an implanted pump-catheter system in a pulsatile fashion prior to surgical resection about four weeks later. The infusate consists of gadolinium (approx. 1:100) plus TPT (146  $\mu$ M). Active infusion will be initiated on post-operative day 1-7 at the discretion of the attending neurosurgeon to allow time for expected and routine recovery from surgery. The patients will then undergo four 48-hour pulses of therapy interspersed by several day therapy holidays. Notably, gadolinium will only be included in the CED infusion during the first and fourth pulses of therapy; during the second and third pulses, topotecan will be infused alone.

In each pulse cycle, patients will receive 200 $\mu$ L/hr of 146 $\mu$ M topotecan for 48 hours (daily volume = 4.8 mL; total volume = 9.6 mL) followed by between five to seven days of therapy holiday during which the pumps will be set at the minimum programmable rate (2 $\mu$ L/hr; 5-7 day volume = 0.24-0.34mL). This cycle will be repeated two more times. After three complete cycles, patients will receive a fourth and final pulse at the same infusion rate (200 $\mu$ L/hr for 48 hours). After this fourth dose, patients will be taken to the OR for pump removal and tumor resection as described. As such, once infusions are initiated, they will be carried out over a total of approximately 23-29 days. Four 48-hour infusion pulses at 200 $\mu$ L/hr will be administered for a total volume infused of 38.4mL. When accounting for the near negligible volume delivered while the pump is placed at minimum performance rate (0.048mL/day for 15-28 days), a combined total volume of 39.12-39.41mL will be infused. Rationale for 48-hour pulsatile infusion is derived from preclinical porcine studies demonstrating that the largest relative gains in volume of distribution of infusate occur within the first 24-48 hours, which subsequently decline as infusions reach a steady state. Similarly, the total volume of infusion and dose concentration is based on our previous clinical trial in which 40mL of drug was infused and an MTD of 218 $\mu$ M TPT was defined. Additionally, the reason for including possible variability in the length of each infusion holiday (5-7 days) is that it will allow investigators to ensure that all surgical procedures, including pump removals, tumor

resections, pump refills, as well as infusion initiations occur during weekdays when all staff members and support personnel are available to provide appropriate safety monitoring.

Tumor and parenchymal distribution and concentration of TPT will be investigated by MRI using gado as a surrogate tracer as well as mass spectrophotometric measurement from the tumor samples obtained at the time of tumor resection. A preoperative MRI will be performed to optimize catheter trajectory selection to ensure optimal CED and tumor coverage. Patients will undergo stereotactic biopsies of the tumor. Intraoperative histopathologic assessment of localized tumor biopsies will be performed to verify the diagnosis and distinguish active tumor from radiation necrosis prior to catheter/pump placement and infusion. These specimens taken at the time of catheter placement will also be used for secondary more comprehensive diagnostic immunohistopathologic and/or molecular analysis as well as for comparison to post treatment specimens.

As secondary objectives, tumor response to TPT will be investigated by MRI and by comparing signs of cytotoxicity between tissue samples from resection and initial biopsy obtained at study initiation. MRIs will be obtained on postoperative day 0 or 1 following catheter implantation prior infusion initiation to confirm catheter placement. For the first infusion, MRIs will then be performed around 8 hours, 14 hours, 24hours and 48 hours after the infusion is started, and then around 8 hours, 14 hours and 24 hours after completion of first infusion. For the remaining three two-day pulses of chemotherapy, MRIs will be performed just before and at 48 hours after start of each infusion. Catheters will be removed upon termination of the final 48-hour infusion pulse at which time patients will undergo surgical resection of the tumor and removal of catheters.

At the time of tumor resection, MRI-directed stereotactic biopsies from different areas within the volume of gado distribution and outside the volume (in areas of non-eloquent brain tissue) will be used to collect specimens for TPT concentration measurements at strategic distances from the catheter tip. Tumor and peritumoral brain tissue removed as part of the surgical resection will be collected for TPT and gadolinium measurements, as well as histological and immunohistochemical analysis of treatment effects, including apoptosis, necrosis, reactive gliosis, inflammation, and edema. These studies will validate the noninvasive parameters established in the pig model.

Patients will remain in the hospital during each two-day infusion, after which discharge safety will be assessed by the PI. At each visit they will undergo a full neurological and physical examination.

The implanted pumps are designed to be refilled percutaneously and will be refilled prior to each new 48-hour pulse. MRIs will be obtained on postoperative day 0 or 1 following catheter implantation prior infusion initiation to confirm catheter placement. For the first infusion, MRIs will then be performed around 8 hours, 14 hours, 24hours and 48 hours after the infusion is started, and then around 8 hours, 14 hours and 24 hours after completion of first infusion. For the remaining three two-day pulses of chemotherapy, MRIs will be performed just before and at 48 hours after start of each infusion. To account for the potential presence of intraparenchymal gadolinium, which would obscure intravenously administered contrast, IV contrast-enhanced MRI (and corresponding perfusion data) will not be performed during the first and fourth 48-hour infusion pulses. Since gadolinium is removed into brain capillaries and undergoes rapid renal

excretion with a blood concentration half-life between 20-70 min[25], we do not expect significant retention of CED gadolinium within the brain parenchyma when IV contrast-enhanced MR imaging occurs during the second and third dose pulses.

The primary goal of the study is to establish, for the first time, the safety of long-term pulsatile topotecan convection enhanced delivery via an implanted system in high grade glioma patients. Secondary outcomes will include determination of the TPT distribution and radiographic tumor response with prolonged CED. After four cycles of infusion, patients will undergo surgical resection of the tumor. At the time of tumor resection, MRI-directed stereotactic biopsies from sites within the gadolinium volume and sites outside (as in the above short-term studies) will be collected for TPT concentration measurements. Tumor and peritumoral brain tissue removed as part of the surgical resection will be collected for histological analysis of treatment effects.

In these initial human studies with CED, it is critical that the patient population be as uniform as possible. Although it will be desirable to expand this treatment to all HGG patients in the future, the purpose of these studies is to generate sufficient monitoring and toxicity data to advance the delivery methodology. Therefore, the study cohort will be carefully selected to consist of patients with minimal tumor resection cavities whose tumors are small and spherical. This selected population represents a very small percentage of patients with recurrent malignant gliomas. We have shown through our previous phase 1 trial that we can recruit this select type of patient who is optimal for CED since our institution treats a high volume of HGG patients.

Patients will return as outpatients for follow-up evaluation at one-two and four-five weeks post infusion termination unless there is clinical or radiographic indication for more frequent monitoring. At these visits, patients will undergo a physical/neurologic examination, neuropsychological evaluations. During the four-five week visit, a brain MRI will be performed to determine tumor response. Further outpatient follow-up will be determined by the patient's primary treating physician in accordance with standard of care. Patients will be contacted every 3-6 months by phone until death in order to assess survival data.

#### 5.4 Study Drug Dose

##### 5.4.1 Starting Dose

###### Concentration

Pulses 1, 2, 3 and 4 will be prepared with 146uM topotecan. This will not be modified at any time.

Pulses 1 and 4 will be prepared with topotecan AND gadolinium at approximately 1:100 concentration ratio to topotecan. This concentration will not be modified at any time.

###### Rate

Active pulse rate: The starting rate will be approximately 200 microliters/hour. Active pulse rate may be modified per section 5.4.2.

Resting rate: The resting pulse rate to be used will be approximately 2 microliters/hour

Study Drug Administration Duration: The duration of each pulse will be approximately 48 hours. This may be modified per section 5.4.2.

Resting Phase Duration: The duration of each resting period will be 5-7 days. This may be modified per section 5.4.2.

#### 5.4.2 Dose Modifications and Delays

If at any time the principal investigator determines that the dose must be modified for patient safety they may make the following modifications: decrease active pulse rate, decrease active pulse duration, increase or decrease resting duration between active pulses to less than 5 or greater than 7 days. Implementation, effective duration of any of the listed modifications remains at the discretion of the principal investigator. If an implemented dose modification is no longer deemed necessary and the principal investigator determines that it is in the patient's best interest to proceed with study therapy for maximal therapeutic benefit, the next scheduled pulse should be administered and may be re-increased in rate or duration as tolerated.

Increased variability in the length of each infusion holiday is meant to allow investigators to ensure that all surgical procedures, including pump removals, tumor resections, pump refills, as well as infusion initiations are not compromised by scheduling conflicts such as weekends, holidays, operative room availability when staff members and support personnel are available. Additional modifications to timing of doses and dose decreases may be performed at the discretion of the PI.

#### 5.5 Dose Limiting Toxicities

Dose limiting toxicities will be defined as any new (or increased from baseline) treatment related (drug and/or device), neurological deficits as found on neurological examination which are grade 3 or higher. These deficits include but are not limited to changes in level of consciousness, new onset speech difficulties (aphasia, mutism, dysarthria), confusion, visual field deficits, focal weakness, seizures.

Furthermore, DLT will include severe myelotoxicity defined as grade 4 thrombocytopenia, anemia, or neutropenia lasting at least 1 week using the current active version of the NCI CTCAE, he/she will be removed from study. However, systemic effects are thought to be minimal due to the small amount of drug expected to enter the systemic circulation.

Notably, maximum tolerated doses were established in a separate phase I trial of CED with topotecan. Toxicity of topotecan was not seen at concentrations of  $\leq 0.10$  mg/ml, which established the maximum tolerated dose (MTD). Neurologic dose limiting toxicities (DLTs) occurred in two patients at the highest administered dose (level V, 0.133 mg/ml), including a parietal lobe syndrome and left upper-extremity weakness. Similar total volumes of drug infusion will also be used as in the prior study. During the previous human trial, two catheters infusing at a rate of

200uL/hr were placed in each patient, and infusions were continued for 100 hours, for a total infusion volume of 40mL.

In this trial, four approximately 48-hour infusion pulses at approximately 200uL/hr will be administered through one catheter for a volume of approximately 38.4mL. When accounting for the near negligible volume delivered while the pump is placed at minimum performance rate (0.048mL/day for 15-28 days), a combined total of approximately 39.12-39.41mL will be infused. During the previous human trial, two catheters infusing at a rate of 200uL/hr were placed in each patient, and infusions were continued for 100 hours, for a total infusion volume of 40mL[1]. In this trial, a MTD of 218uM was defined. Thus, patients tolerated both a higher total dose and similar volume infused as in the currently proposed trial.

**Early Stopping Rule guidelines:**

In the event 2 DLT's occur (as defined above), study enrollment will immediately be halted. After re-evaluation and consultation with the HICCC DSMC board, the trial may re-initiate enrollment with adjusted treatment parameters after a consensus is agreed upon by the Sponsor-Investigator and the HICCC DSMC, and a subsequent modification is reviewed/approved by the local PRMC/IRB. If a consensus cannot be reached, no further enrollment will be permitted on the trial and closure procedures will be initiated.

**5.6 Number of Patients**

Five evaluable patients with recurrent HGG will be recruited for infusion of TPT and gadolinium by pulsatile CED over approximately 23-29 days, followed by surgical resection of the tumor.

Since recurrent glioma and radiation necrosis are difficult to distinguish on imaging, several patients meeting enrollment criteria may not meet treatment criteria. As such, initial enrollment numbers may have to exceed treatment numbers to ensure that 5 patients enter the treatment study. Based on rates of radiation necrosis, which are roughly 10% of reoperations[26], we will cap enrollment at 10 patients (barring any early stopping rule concerns as indicated in section 5.5 above). Enrollment will stop when 5 evaluable patients have been obtained (barring any early stopping rule implementation as outlined above). Thus, we will have an initial enrollment of 10 patients, and a maximum of 5 evaluable patients that undergo catheter implantation and complete topotecan infusion. Furthermore, if patients who have catheters placed and infusion initiated fail to complete the full course of infusion due to reasons unrelated to treatment related toxicity, they will be considered inevaluable for the primary endpoint (but evaluable for toxicity), as the primary study endpoint is assessment of infusion safety over a full four cycles of infusion lasting between approximately 23-29 days. If a patient's infusion is terminated early for reasons unrelated to treatment toxicity/DLTs, then a new subject will be recruited to replace him/her to ensure a total of 5 evaluable subjects at the completion of the study. If patients are removed from the study as a result of failure to follow up with pre-defined safety follow-up evaluations, they will also be considered inevaluable, as assessment of infusion safety will not be ascertainable in such patients. As above, such inevaluable patients will be replaced with newly recruited and enrolled evaluable patients.

## 6. SUBJECT SELECTION AND WITHDRAWAL

### 6.1 Inclusion Criteria/Eligibility Requirements

1. Patients must have suspected recurrent malignant glioma (WHO grade III-IV), including recurrent glioblastoma, anaplastic astrocytoma, anaplastic oligodendroglioma, anaplastic oligoastrocytoma, and anaplastic ependymoma. Stereotactic biopsies will be performed to confirm the presence of active tumor by frozen section prior to initiating the treatment.

2. Patients with tumors of the brain must have been previously treated with surgical resection, temozolomide chemotherapy, and external beam radiation. Other additional treatments are permitted without limitation.

Note: Patients with tumors that are unmethylated are not required to have been treated with temozolomide chemotherapy, as current SOC and clinical trial treatment for patients with unmethylated tumors may exclude temozolomide chemotherapy.

3. An MR scan must be obtained within 30 days of enrollment and must demonstrate an enhancing mass without significant mass effect. Tumors must be less than approximately 32 cc in total volume, as assessed by the PI based on pre-enrollment MRI. The lesion must be stereotactically accessible.

4. Patients must have demonstrated evidence of increasing contrast enhancement on MR or CT imaging while on stable or increasing dose of steroid.

5. Karnofsky performance score of greater than or equal to 70.

6. Men and women of childbearing potential must practice birth control. Women of child bearing potential must have a urine pregnancy test within 7 days of study entry. In accordance with topotecan administration guidelines, women must practice birth control for at least 1 month following chemotherapy infusion. Men must practice birth control for at least four months following termination of chemotherapy infusion.

7. Patients or appropriate legally authorized representatives must possess the ability to give Informed Consent.

8. Patients must be willing to and medically capable of undergoing the surgical operation.

9. Patients must be at least 18 years old.

10. Patients must have normal organ and marrow function as defined below 14 days or fewer from registration:

- Leukocytes:  $\geq 3,000/\text{mcL}$
- Absolute neutrophil count:  $\geq 1,500/\text{mcL}$
- Platelets:  $\geq 100,000/\text{mcL}$
- Total bilirubin: within normal institutional limits
- AST(SGOT)/ALT(SGPT):  $\leq 2.5 \times$  institutional upper limit of normal
- Creatinine: within normal institutional limits

OR

- Creatinine clearance:  $\geq 60 \text{ mL/min/1.73 m}^2$  for patients with creatinine levels above institutional normal.

The effects of Topotecan on the developing human fetus are unknown. For this reason and because category D agents are known to be teratogenic, women of child-bearing potential and men must agree to use adequate contraception (hormonal or barrier method of birth control; abstinence) prior



to study entry and for at least one month following topotecan infusion. Should a woman become pregnant or suspect she is pregnant while she or her partner is participating in this study, she should inform her treating physician immediately. Men treated or enrolled on this protocol must also agree to use adequate contraception prior to the study, for the duration of study participation, and 4 months after completion of Topotecan administration as topotecan may damage spermatozoa resulting in possible genetic and fetal abnormalities. These recommendations regarding men and women of child bearing age are based on the package insert for systemic administration of topotecan.

#### 6.2 Exclusion Criteria

1. Patients with diffuse subependymal or CSF disease.
2. Patients with tumors involving the cerebellum or both cerebral hemispheres.
3. Patients with an active infection requiring treatment or having an unexplained febrile illness.
4. Patients who are known HIV, Hepatitis B or Hepatitis C positive. HIV-positive patients on combination antiretroviral therapy are ineligible because of the potential for pharmacokinetic interactions with topotecan. In addition, these patients are at increased risk of lethal infections when treated with marrow-suppressive therapy. Appropriate studies will be undertaken in patients receiving combination antiretroviral therapy when indicated. HIV, Hepatitis B and Hepatitis C testing is not required for patients not known to have those infections.
5. Patients with systemic diseases which may be associated with unacceptable anesthetic/operative risk.
6. Patients who have previously received systemic topotecan for their tumor.
7. Patients who are not able to receive MRI or PET scans.
8. History of allergic reactions attributed to compounds of similar chemical or biologic composition to topotecan, other topoisomerase inhibitors or gadolinium compounds.
9. Patients who are currently receiving treatment with agents that are metabolized solely through cytochrome P450 (CYP) 3A4/5 (CYP3A4/5) and have a narrow therapeutic index or are strong CYP2C8 inhibitors; or are receiving treatment with agents that carry a risk for QT prolongation and are CYP3A substrates. Caution should be used in patients taking other CYP2C8 - or CYP3A4/5-interacting agents as they may increase the serum concentrations of topotecan. If previously on such agents, the patient must be off of it for at least two weeks prior to study treatment.
10. Patients with uncontrolled intercurrent illness including, but not limited to, ongoing active infection, systemic congestive heart failure, unstable angina pectoris, cardiac arrhythmia, or psychiatric illness/social situations that would limited compliance with study requirements.
11. Women of child-bearing potential must have a negative pregnancy test 7 or fewer days from registration.
12. Women must agree not to breast feed while on study.

#### 6.3 Inclusion of Women and Minorities

Both men and women of all races and ethnic groups are eligible for this trial.

#### 6.4 Subject Recruitment

Patients will be recruited from the Neurology and Neurosurgery practices/clinics at Columbia University Medical Center. All patients will be seen by an attending physician who is an

investigator on the trial.

## 6.5 Early Withdrawal of Subjects

### 6.5.1 When and How to Withdraw Subjects

- If the patient's initial stereotactic biopsy is not consistent with recurrent high grade glioma, he/she will be deemed inevaluable and removed from the study **and replaced**. He/she will not undergo catheter implantation or topotecan infusion.
- If the patient's final pathology analysis of initial stereotactic biopsies fails to validate intraoperative assessment of tumor recurrence, he/she will be deemed inevaluable, and will be removed from the study **and replaced**. He/she will not initiate topotecan infusion, and will undergo removal of catheter and pump as needed.
- If at any time the patient develops unacceptable toxicity, such as severe myelotoxicity defined as grade 4 thrombocytopenia, anemia, or neutropenia lasting at least 1 week using the current active version of the NCI CTCAE, he/she will be removed from study. However, systemic effects are thought to be minimal due to the small amount of drug expected to enter the systemic circulation.
- If the patient fails to comply with the defined treatment plan and follow-up evaluations, the patient may be removed from the study at the discretion of the treatment investigator.
- If the patient withdraws consent for continued participation, he/she will be removed from study.

### 6.5.2 Data Collection and Follow-up for Withdrawn Subjects

Even though subjects may be withdrawn prematurely from the study, it is imperative to collect at least survival data on such subjects throughout the protocol defined follow-up period for that subject (though careful thought should be given to the full data set that should be collected on such subjects to fully support the analysis). Such data is important to the integrity of the final study analysis since early withdrawal could be related to the safety profile of the study drug. If a subject withdraws consent to participate in the study, attempts will be made to obtain consent from the subject to record at least survival data up to the protocol-described end of subject follow-up period. It must be a high priority to try to obtain at least survival data on all subjects lost to follow-up and to note what methods should be used before one can state the subject is truly lost to follow-up (e.g. number of phone calls to subject, phone calls to next-of-kin if possible, certified letters, etc.). Subjects who have received study drug and are withdrawn because of unacceptable adverse events will be followed until resolution or stabilization of the adverse event. An exception to this continued follow-up includes patients whose initial biopsies are not consistent with recurrent high-grade glioma and are removed from the study prior to catheter implantation and treatment initiation due to being inevaluable. Since these patients will not have undergone any experimental treatment intervention, study follow-up will be unnecessary beyond appropriate safety monitoring. They will undergo standard postoperative follow-up with the operating surgeon. In all cases, survival information may be available from public records, and will be collectable, consistent with FDA guidelines.

## **7 REGISTRATION PROCEDURES**

### **7.1 CUMC Research Participant Registration**

Confirm eligibility as defined in the section entitled Criteria for Subject Eligibility.

Obtain informed consent, by following procedures defined in section entitled Informed Consent Procedures, along with applicable institutional policies and federal regulations.

Only Investigators/Research personnel properly trained and delegated to consent subjects for this protocol will participate in the consenting process. Furthermore, properly delegated/trained Physician Investigators (e.g., MD, MD PhD) are required to sign/verify a protocol specific Eligibility Checklist for each subject enrolled on the study, in addition to providing the relevant source documentation confirmation subject eligibility.

All participants must be centrally registered through the Central Registration Office within Herbert Irving Comprehensive Cancer Center at CUMC prior to initiation of study treatment.

Registration hours are available Monday through Friday from 9:00am – 5:00pm EST (excluding holidays and weekends). Same day patient registrations (and after hour registrations) will be accommodated on a case by case basis provided that the study team has expressed all time sensitive registration concerns/cases in a timely manner to the Central Registration Office.

#### **CPDM Central Registration Procedures:**

Within 48 hours of obtaining consent (excluding holidays and weekends), a completed/signed IRB approved informed consent HIPAA form, and demographics forms should be submitted to the CPDM Central Registration Office via an email to [CPDMRegistration@columbia.edu](mailto:CPDMRegistration@columbia.edu) or fax to 212.305.5292, with the subject line “AAAQ9520 Pending Subject Registration Request (PHI)”. Upon receipt, applicable subject information as well as a “pending eligibility” status will be entered into HICCC’s institutional database. This status will remain until further source documentation is made available to confirm overall patient eligibility. Required materials for all pending registration submissions are as follows:

- Completed/signed IRB approved/stamped Informed Consent Forms, including additional study ICFs (e.g., tissue, DNA, etc.), as applicable.
- The completed/signed IRB approved HIPAA Authorization form
- Completed/signed CPDM ICF checklist
- Completed/signed HICCC personal census form
- Completed/signed CPDM Demographics Note to File

In order to confirm eligibility status, Investigators/designees (e.g., study specific Clinical Research Coordinator/Research Nurse, etc.) must submit the following documentation to the Central

**Columbia University Medical Center  
Herbert Irving Comprehensive Cancer Center  
Version Date: 04/03/2019**

Registration Office via email or fax:

- The completed/signed study specific Eligibility Checklist (signed by a Physician level Investigator)
- Copies of source documentation necessary for each item to be verified on the CPDM specific Eligibility Checklist, including but not limited to:
  - Copy of required laboratory test and procedure reports (e.g., hematology, serum chemistry, pregnancy test when applicable, MRI reports, CT/bone scans, etc.)
  - Copy of pathology and surgical reports
  - Copy of clinic note(s) or other appropriate medical records capturing the consent process information, along with providing source documentation of any other items needed for screening/eligibility that are not captured in other source document forms (e.g., positive investigator statements of unique eligibility items not captured via other direct source documentation, concomitant medication lists, etc.)
  - Protocol deviation/waiver approvals (if applicable)
- **Please note**: subject line of email or fax should include the following: “AAAQ9520 Complete Subject Registration Request (PHI)”.

Upon receipt of the above mentioned documentation, participant eligibility information will be verified by a qualified Central Registration Registrar. If any questions arise during the review process, queries in the form of emails will be addressed to the applicable study team personnel for clarification prior to enrollment. All applicable finalized registration/eligibility information will then be entered into HICCC’s institutional CTMS database by the Central Registration Registrar. Upon completion, an official subject registration notification email will be sent to the PI/research team which will include eligibility/enrollment status, as well as subject ID information. Protocol therapy may not be initiated prior to receipt of this notification from the Central Registration Office.

All screen fail/ineligible subjects, as well as subject’s who withdraw consent prior to enrollment/initiation of protocol therapy must be submitted to the Central Registration office in a manner analogous to the procedures noted above. Applicable source documentation will be required within the corresponding submissions.

## **8. TREATMENT PLAN**

**Note:** A detailed chronological description of study procedures has been included. Please see Appendix B.

### 8.1 Agent Administration

Patients will have treatment administered on an inpatient or outpatient basis per investigator discretion. Patients will be hospitalized during each active infusion pulse lasting 48 hours, plus or minus 6 hours. Patients may be discharged from the hospital during the intervening 5-7 day infusion holidays at the discretion of the investigator. Reported adverse events and potential risks for Topotecan and Gadolinium are described in Section 10. Appropriate dose modifications for Topotecan and Gadolinium are described in Section 9.

Patients will receive 200uL/hr of 146uM topotecan for 48 hours, plus or minus 6 hours (daily volume = 4.8 mL; total volume = 9.6 mL) followed by between five to seven days of therapy holiday during which the pumps will be set at the minimum programmable rate (2uL/hr; 5-7 day volume = 0.24-0.336mL). This cycle will be repeated two more times. After three complete cycles, patients will receive a fourth and final pulse at the same infusion rate (200uL/hr for 48 hours, plus or minus 6 hours ). After this fourth dose, patients will be taken to the OR for pump removal and tumor resection as described. Once infusions are initiated, they will be carried out over a total of approximately 23-29 days. Gadolinium will only be included in the CED infusion during the first and fourth pulses of therapy; during the second and third pulses, topotecan will be infused alone. Minor under or over infusions of 10% or less are not considered protocol violations. See section 5.4.2 for dose modifications.

Gadolinium is a widely available MRI contrast agent that is used routinely in clinical practice via IV administration, especially for imaging of intracranial tumors. Gadolinium has been utilized in multiple previous CED investigations with promising results [2, 5, 17-22], and, thus, can be safely used as an intraparenchymal CED co-infusate in this study. The interactions between topotecan and gadolinium have been evaluated via multiple assessments, and no concerning interactions have been identified. During our porcine trial, gadolinium was included in all infusions. Characteristic hyperintense T1 gadolinium signal was appreciated on all MRIs performed, suggesting that gadolinium's imaging properties are retained despite presence of topotecan. MTS assays were performed on human U87 glioma cell lines in which cytotoxic efficacy of 146uM topotecan both with and without 1:100 gadolinium were assessed. In comparison to nutrient rich media without drug, both the TPT-alone and TPT-gadolinium treated cells demonstrated a statistically significant reduction in glioma cell density ( $p < 0.01$  for both). However, no difference in cytotoxicity was seen when the TPT-alone and TPT-gadolinium treated cells were compared ( $p = 0.48$ ; see study report). TPT, therefore, retains its anti-tumoral activity at 48 hours despite the presence of gadolinium.

#### 8.1.3 Other Modalities or Procedures

##### Implanted pumps:

##### *Medtronic Synchroned II:*

- 1) **PMA/510(k) number:** P860004
- 2) **Model Number:** Model 8637-20
- 3) **Indication for Use**

- a. **Approved:** “Chronic intraspinal (epidural and intrathecal) infusion of preservative-free morphine sulfate sterile solution in the treatment of chronic intractable pain, chronic intrathecal infusion of preservative-free ziconotide sterile solution for the management of severe chronic pain, and chronic intrathecal infusion of Lioresal® Intrathecal (baclofen injection) for the management of severe spasticity; chronic intravascular infusion of floxuridine (FUDR) or methotrexate for the treatment of primary or metastatic cancer. Outside of US: Chronic infusion of drugs or fluids tested as compatible and listed in the product labeling.”[23]
  - b. **Proposed:** Chronic intracerebral infusion of topotecan-gadolinium for patients with recurrent high grade glioma.
- 4) **Administration routes/drugs**
- a. **Approved:**
    - i. **Drugs:** Morphine sulfate, Baclofen, Ziconotide, Floxuridine, Methotrexate
    - ii. **Routes:** Epidural, Intrathecal, Intravascular
  - b. **Proposed:**
    - i. **Drugs:** Topotecan, gadolinium
    - ii. **Route:** Intracerebral (intratumoral)
- 5) **Critical Performance Attributes**
- i. **Approved:** Flow rates: 0.048mL/day-24mL/day
  - ii. **Proposed:** Flow rates: 0.048mL/day & 4.8mL/day
- 6) **Accessories (software programmer, catheters, tubing, etc.)**
- a. **Catheters:** Ascenda intrathecal catheter (models 8780, 8781)
  - b. **Programmers:** **Synchromed II Tablet Clinician Programmer; N’Vision Clinician Programmer** (model 8840), myPTM Personal Therapy Manager (model 8835)

Synchromed II infusion pumps (Medtronic), currently FDA-approved for the treatment of spasticity and chronic pain, will be implanted subcutaneously to facilitate chronic infusion of intracerebral chemotherapy. This application represents an off label use of this device. Such an internalized infusion system will allow the extension of CED to approximately 23-29 days while avoiding complications associated with externalized catheters. Preclinical studies in pig models have demonstrated both safety and feasibility of prolonged intracerebral topotecan CED utilizing internalized Synchromed II infusion pumps (see section 4.1).

The Synchromed II infusion pump will be used well within its critical performance range to chronically deliver a fixed volume of fluid over time. The Medtronic pump will be placed under the subcutaneous fascia. This is consistent with the approved use of this product, as such no bio-incompatibility is expected. In these regards, the proposed use of this product for this study is not different from its approved use. The differences that arise are two.

One difference is a change in the drug that is being delivered. Topotecan-gadolinium will be used instead of the approved morphine sulfate, baclofen, ziconotide, floxuridine, and methotrexate. Notably, since the pump is compatible with methotrexate, there is a precedent for

its use with chemotherapeutics. The risk of using topotecan-gadolinium, which is not currently approved for use with this pump, is that drug-device incompatibility could occur leading to over/underdosing of medication or damage to the device. However, based on our preclinical studies in pigs in which the same pumps and drugs were used, no device interactions were noted. Pumps did not experience unexpected stalls or interruptions in infusions. Pumps continued to infuse without complication throughout the entirety of the intended infusions (up to 32 days). Topotecan was detectable in the target tissue by LCMS and gadolinium was detectable by MRI, suggesting that neither drug was altered by the device components with which it came into contact. The risk of drug incompatibility causing dosing errors will be mitigated by regular pump interrogations following pump implantation as well as prior to and following all MRI procedures and pump refills. During pump refills, remaining drug volumes will be aspirated, measured, and compared to the expected remaining volume based on infusion rates. While passing through the Medtronic pump, the study drug will come into contact with the following materials: titanium, silicone, and polyvinylidene fluoride. There is no expected interaction between study drug and titanium or silicone, as these products are used in several implanted ports through which topotecan has been infused in human trials[27]. Polyvinylidene fluoride is a plastic that is particularly nonreactive, and resistant to solvents, acids, and bases. As such, this material would not be expected to interact with study drug. Furthermore, as mentioned above, in our porcine experiments, topotecan was detectable in the target tissue by LCMS and gadolinium was detectable by MRI, suggesting that neither drug significantly interacted with materials within the Medtronic pump.

The second difference that arises in this experiment is the target infusion location. The pump is approved for use in the epidural, intrathecal, and intravascular spaces; however, our project will employ its use in the intracerebral space. The issue should not present significant new risks, as the pumps ability to infuse a fixed volume of fluid over time should not be changed by the intracerebral location of the infusion catheter. By nature of the fact that the pump is certified for intrathecal use, it is capable of delivering drug despite normal fluctuations in ICP. In fact, the fluctuations in ICP encountered in lumbar intrathecal location would be greater than those found intracranial, as intrathecal lumbar pressure can fluctuate widely with patient position (standing, recumbent). Since intracerebral placement, would subject the pump to usual intracranial ICP (with fewer fluctuations than lumbar placement) there should be no pressure related mechanical issues preventing stable infusion. The risk that arises due to intracranial location is that errors in dosing could result in cerebral damage. Again, this risk is mitigated by the fact that the pump will be used within its critical performance attribute range. The pump will be regularly interrogated and drug dosing will be regularly checked as described above. Regular cerebral imaging (MRIs) will be obtained, in which brain swelling and mass effect will be assessed. In the case of complication related to drug infusion causing cerebral edema/mass effect, the following measures (as described in the protocol) can be performed if indicated: the infusion can be stopped, steroids, mannitol, hypertonics can be administered, and decompressive craniotomy/craniectomy can be performed.

Pump programmers:

All pump settings will be programmed into the pump using the Synchronmed II Tablet clinician

programmer . Prior to pump implantation and catheter connection, the pump will be filled with study drug and then programmed to deliver a priming bolus of 0.3mL so that the internal pump tubing is primed with study drug. As mentioned, the use of this priming bolus program will be used prior to pump implantation, as is recommended in the Medtronic manual.

Following the priming bolus, the pump will be implanted. Active infusion will then be initiated 1-7 days following pump implantation. At that time, the pump will be programmed to the “simple continuous” setting at an infusion rate of approximately 0.2ml/hr for 48 hours, plus or minus 6 hours. Upon completion of the intended 48 hours of infusion, the pump will then be set at the minimal programmable flow rate of 0.048ml/hr, for 5-7 days, plus or minus one day. This processes will be repeated for every subsequent pulse. After each reprogramming, the pump will be interrogated with the Synchronomed II Tablet clinician programmer to ensure the correct settings are programmed.

Notably, the myPTM Personal Therapy Manager will not be utilized, as all interrogations and infusion adjustments will be performed by the study investigators. In order to ensure safety, patients will not have the ability to modify the infusion rates, as such the myPTM Personal Therapy Manager will have no role in this study.

#### Infusion Catheters:

##### *Spetzler Lumbar Peritoneal Catheter*

- 1) **PMA/510(k) number:** K811288
- 2) **Model Number:** Integra (NL97105S01)
- 3) **Indication for Use- approved and proposed**
  - a. **Approved:** CSF drainage from lumbar subarachnoid space to the peritoneum (lumboperitoneal shunt)
  - b. **Proposed:** Intracerebral/intratumoral infusion of topotecan
- 4) **Administration routes/drugs**
  - a. **Approved:** Intrathecal; CSF drainage
  - b. **Proposed:** Intracerebral; topotecan-gadolinium infusion
- 5) **Critical Performance Attributes**
  - a. Length-105cm; Outer diameter-1.5mm; Inner diameter-0.7mm
  - b. Should not be used for CSF drainage in presence of non-communicating hydrocephalus, known or suspected meningitis, ventriculitis, skin infection, bacteremia, septicemia, or peritonitis.

The catheter is made of a silicone elastomer and approved for lumbar subarachnoid placement for drainage of CSF into the peritoneum. In the proposed study, the catheter will be placed intraparenchymal which represents a difference from it approved placement route. This application represents an off label used of this device. Both of these spaces (intra-parenchymal and lumbar subarachnoid) however, are intradural and thus within the neuroaxis. As such, there should be no



increased risk of infection/meningitis with the proposed placement. In terms of catheter contact with the brain parenchyma, no additional risk is perceived as the catheter is made of the same silicone elastomer as all Integra CSF shunting products, many of which are purposely designed to traverse brain parenchyma. Furthermore a larger diameter Integra lumbo-peritoneal catheter of the same type was used in our previous human trial for intraparenchymal/intratumoral placement and topotecan infusion without catheter-associated complications[1].

In its approved use, the lumbar catheter tubing passes through muscle, fascia, fat, and subcutaneous tissue, and is thereby compatible with all of these spaces. The catheter, in the proposed use, will be placed below the subcutaneous fascia and above muscle. Since the catheter normally passes through these spaces, no biological incompatibility is expected with the proposed use. Furthermore, during our porcine preclinical experiments in which these catheters were placed in the subcutaneous soft tissue, no abnormal tissue swelling or breakdown was seen along the catheter tract.

The main risk arises from the fact that the catheter is not designed for drug delivery. As such, there is a risk of drug incompatibility with the catheter material. As mentioned above, this catheter is made of the same silicone elastomer as other Integra CSF shunting products. Specifically, the Integra Pudenz proximal catheter (Integra, Plainsboro NJ, NL850-1504) is also made of silicone elastomer, and is designed for both CSF shunting as well as drug delivery. This silicone catheter is used in conjunction with Integra Ommaya drains (Integra, Plainsboro NJ, product number: NL8501213) to deliver various intrathecal chemotherapeutics, including topotecan in various clinical trials [28-32]. As such, there is no reasonable expectation of drug-material interaction using the proposed catheter. This expectation is supported by the fact that topotecan-gadolinium was infused through proposed lumbar catheters in our preclinical porcine trial. Following infusion through these catheters, topotecan was detectable in the target tissue by LCMS and gadolinium was detectable by MRI, suggesting that neither drug was altered by the catheter components with which it came into contact. Following infusions, visual inspection of the catheters revealed no breaks or discontinuities in the catheter materials.

Additionally, since the catheter is not designed specifically for drug delivery, there is the possibility that the catheter will be unable to deliver drug at the desired rate due to flow limitations. This risk is extremely unlikely. The lumbar catheter is designed to accommodate fluid flow at a rate similar to (and exceeding) that of CSF production, which is roughly 20mL/hr. As such, the catheter should be capable of accommodating continuous fluid flow at the far lower rate of 0.2mL/hr required in this study. Again, in preclinical porcine studies, topotecan-gadolinium was successfully delivered through this catheter without obstructions to flow as evidenced by the presence of intracerebral gadolinium observed on MRI. To ensure appropriate drug delivery through the catheter, regular pump interrogations will be performed as described above. During pump refills, remaining drug volumes will be aspirated, measured, and compared to the expected remaining volume based on infusion rates. Serial MRIs will be performed to ensure successful delivery of drug to the target tissues.

The only modification that will be made to the catheters is that roughly 20mm of the proximal end of the closed tipped catheters will be cut off. This modification will remove the multiple

draining holes that are found along the length of the first 17mm the catheters. This modification will ensure that there is only one efflux point for the drug infusion from catheters. It will also allow connection of the lumbar catheter to both the intracerebral catheter and infusion pump, thereby creating a closed system with no additional/unintended points of drug efflux. This modification will increase safety, as it will ensure that drug is delivered directly to the desired target area at the tip of the catheter. This modification should pose no increased risk to the patient.

While the lumbar catheter proposed is not approved for use with the Medtronic pump, it has been used in combination with the Synchronomed II pump in our preclinical animal experiments without issue. The outer diameter of the proposed catheter is 1.5mm and the inner diameter is 0.7mm. This catheter has been used during preclinical pig experiments. A secure connection between the catheter tubing and the Synchronomed II port is able to be formed without slippage of the catheter. However, the main risk of using this catheter with the Synchronomed pump would be a catheter-pump disconnection. This risk is mitigated by tying a 2-0 silk suture around the connection site and securing it with tight surgical knots. This technique has been used in the pig experiments and no instances of catheter-pump disconnections occurred. To further mitigate risk of catheter pump disconnection, an excess loop of catheter will be left in the shunt pocket to allow for additional slack on the catheter thereby preventing tension from being placed on the catheter-pump connection.

Note: The contraindication to use of the lumbar catheters in patients with large intracranial masses, tumors or hematomas does not pertain to this study. The contraindication is specifically in reference to lumbar CSF drainage, which, when performed in patients with such masses, can induce brainstem herniation. Since the catheter will not be used for CSF drainage in this study, the contraindication does not apply. Furthermore no metal or valve elements of the typical Spetzler shunt system will be used in this experiment. The only part of the system that will be used is the MRI-safe silastic catheter.

Biopsies, Catheter placement and MRI imaging Procedures:

A pre-biopsy MRI will be performed to optimize catheter trajectory selection to ensure optimal CED and tumor coverage. Patients will then undergo stereotactic biopsies of the tumor to verify the diagnosis and distinguish active tumor from radiation necrosis (also called pseudoprogression or treatment effect). The specimens taken at the time of catheter placement will also be used for comparison to post treatment specimens. If the initial biopsies are consistent with active tumor/ recurrent tumor on a frozen section performed at the time of biopsy, the patient will be considered pathologically evaluable, and catheter placement will proceed. If the initial biopsies are consistent with active tumor/ recurrent tumor on a frozen section performed at the time of biopsy, the patient will be considered pathologically evaluable, and catheter placement will proceed. However, if the final pathology analysis fails to validate intraoperative assessment of tumor recurrence, treatment may not be necessary, the patient will be deemed inevaluable, and will be removed from the study and replaced. The patient will not initiate topotecan infusion, and will undergo removal of catheter and pump as needed.

If frozen section pathology does not clearly demonstrate active tumor consistent with high grade

glioma, the patient will be considered unevaluable (and subsequently replaced), the procedure will be stopped, and the patient's incision will be closed in standard surgical fashion. We recognize that final pathology may yield a diagnosis of recurrent tumor not confirmed on frozen section; such patients will be planned to undergo resection as part of standard of care at the discretion of the treating investigator, but we would prefer to exclude some patients who may ultimately be proven to have recurrence to guard against the possibility of treating a patient who does not have recurrent active tumor.

All measurements and volumes below are to be considered approximate and minor differences in technique at the discretion of the surgeon are not considered protocol violations.

For the pathologically evaluable patients, a cranial incision and burr hole will be made through which a single catheter will be placed stereotactically into the geometric center of the tumor at a site chosen to maximize coverage of the tumor and adjacent infiltrated brain tissue based on spherical distribution. We will utilize a simple 1.5 mm outer diameter silastic Spetzler lumbar shunt catheter that is commercially available (Integra, Plainsboro, NJ; see above) for intracranial placement. Our experience testing different catheters is that they play a minor role in CED. That is, the design of the catheter does not significantly alter the more important aspect of CED, which is to maximize the volume of distribution. Our use of the standard shunt catheter is in keeping with our goal of a CED system that will be readily available to other investigators. All catheters will be trimmed in order to remove multiple drainage slits from the proximal and distal ends of the catheter. This will require 1.7cm of catheter to be removed from the distal end and 4cm of catheter be removed from the proximal end. This trimming will occur intraoperatively on the sterile surgical equipment stand. The catheter will be trimmed at 90 degrees to the length of the catheter using standard sterile surgical scissors. The excess catheter ends will be immediately removed from the surgical field, counted, and discarded. The proximal catheter will be placed without priming, as an inner stylet will be required to assist placement. The distal catheter and pump will be primed with study drug prior to implantation. Importantly, since the proximal catheter will not be primed, there will be an unavoidable amount of dead space in the catheter system. The maximal proximal catheter length will be 99.3 cm, taking into account the 1.7 cm and 4 cm of length that will be removed from the distal and proximal ends of the catheter, respectively. The inner diameter of the catheter is 0.07 cm. Thus, the maximal dead space volume is 0.38 mL. In certain patients, the length of the proximal catheter may have to be shorted based on the depth of the tumor. However, any changes to the length of the catheter will result in sub-milliliter differences in the volume of dead space. Such a small volume of maximal dead space and inter-patient variability in dead space is considered negligible for the purposes of this study. Given the fact that maximal infusion volumes in our porcine preclinical studies have reached an average volume of 11.30 mL, a dead space volume of up to 0.38 mL should not present a barrier to assessment of therapy distribution.

A second incision roughly the size of the infusion pump will be made in either the chest or the subcostal region (midway between the rib bone and hip bone) ipsilateral to the intracranial catheter. Chest or subcostal placement will be decided by the operative surgeon based on the patient's body habitus. A subcutaneous pocket large enough to hold the infusion pump will be created using blunt dissection. Once the pocket is created, a second, 1.5mm outer diameter silastic Spetzler Integra

lumbar catheter (see above) will be tunneled rostrally within the subcutaneous tissue to the cranial incision using a shunt passer as is done in typical ventriculoperitoneal shunt placement. The proximal and distal tubing will be connected with a nylon straight connector, and the distal tubing will be connected to the infusion pump, which will be placed in the subcutaneous pocket that was created. All connection points will be reinforced with 2-0 silk suture ties. Of note, the pump will be implanted with the device face up in the subcutaneous soft tissue while the patient is supine (required to allow for pump refills). In this position, the refill port face of the pump will run parallel to the patient's skin. This face up position relative to the patient will be confirmed prior to closure of the surgical site. This positioning is important as it will prevent permanent pump stalls caused by 90° alignment of the implanted pump with the Z axis of 1.5 T and 3.0 T horizontal, closed-bore magnetic resonance imaging (MRI) scanners during MRI procedures. After pump position is confirmed, the proximal and distal incisions will then be closed in standard fashion after hemostasis is achieved and the wounds are copiously irrigated with antibiotic irrigation as per typical protocol. Closure of all wounds will provide a safe, closed, sterile system suitable for chronic treatment. CT and/or MRI will be performed to confirm intracerebral catheter placement. Following pump-catheter placement, the patient will be given 1-7 days to recover from surgery prior to initiation of active infusion.

There is potential for permanent stall if there is 90° alignment of an implanted pump with the Z axis of 1.5 T and 3.0 T horizontal, closed-bore magnetic resonance imaging (MRI) scanners. As recommended by the Medtronic manual, prior to all MRIs, pumps will be palpated by the investigator to ensure that their positioning has not shifted and to confirm that there is no possibility for a 90-degree alignment with the Z axis of the MRI. In accordance with Medtronic recommendations, pumps will be interrogated with the SynchroMed II Tablet clinician programmer following MRIs. The investigator will ensure that the event log has recorded the following events: "Motor stall occurred" and "Motor stall recovery occurred." If these events are not logged, the pump will be re-interrogated after 20 minutes as is recommended. This procedure will be repeated until stall recovery is recorded. If motor stall recovery is not achieved after repeated attempts, a Medtronic representative will be contacted for further troubleshooting assistance.

Pumps will be refilled percutaneously with new infusate prior to the start of each new 48-hour pulse.

Quality of life and cognitive stability assessments will be administered throughout the infusion process and at designated follow-up intervals (see section 12).

After four cycles of infusion, patients will undergo craniotomy for surgical resection of the tumor. Surgery will proceed in standard fashion with the use of frameless stereotactic neuronavigation. At the time of tumor resection, MRI-directed stereotactic biopsies from sites within the gado volume and sites outside will be collected for TPT concentration measurements at strategic distances from the catheter tip. Tumor and peritumoral brain tissue removed as part of the surgical resection will be collected for histological analysis of treatment effects. During this procedure, the entire infusion system will be removed, including the intracranial catheter, tunneled distal catheter,

and infusion pump. The infusion pump will be removed by reopening the previous chest or subcostal incision, which will then be closed in standard surgical fashion after the pump is removed and hemostasis is achieved.

Throughout the course of the infusions there will be multiple checks in place in order to identify system failures. Firstly, patients will undergo serial MRIs. This procedure will provide direct visual evidence of continued drug delivery. If a decreasing volume of drug distribution is seen during an active infusion, or if an increasing volume of drug distribution is seen during a rest phase, the system will be further investigated via pump interrogation and possible residual drug aspiration. Following every MRI and refill procedure, the pump will be interrogated using the Synchronmed II Tablet clinician programmer. The programmed infusion rate will be verified, and any stalls or incorrectly programmed rates will be noted. The programmer will also be used to check the residual volume of drug in the pump. This value is the result of a calculation based on the programmed rate and initial drug volume in the pump. This calculated volume will then be compared to the volume of residual drug aspirated from the pump during refill procedures. Any discrepancy between calculated residual volume and actual residual volume may signal an infusion malfunction. Such discrepancies will be recorded. By comparing data from pump interrogations, refills, and MRIs, both the integrity of the pump and catheter can be assessed. For instance, if infusion is not seen on MRI, and both pump interrogation and residual pump volume investigation are normal, a potential catheter disconnection may explain the MRI findings. In this situation, an X-ray or ultrasound of the catheter course can be obtained to assess the integrity of the tubing. If infusion is not seen on MRI, electronic pump interrogation is normal, but excess residual drug is aspirated during a refill, a block in the tubing may have occurred. Again, an X-ray or ultrasound can be obtained to assess the integrity of the tubing. Failures in the pump itself will be recognized by electronic interrogation.

#### Pump Refills:

Pumps will need to be refilled prior to each pulse of therapy. Pump refills will be performed at the bedside while the patient is inpatient. The pump will be refilled in standard fashion in accordance with Medtronic guidelines using a designated Medtronic SynchroMed II refill kit. The pump template will be used to localize the refill port. If factors such as seroma or deep pump placement limit the ability to localize the refill port by palpation, X-ray will be utilized in accordance with Medtronic recommendations. Once the refill port is localized, the skin and soft tissue will be locally anesthetized with a local anesthetic injection. A 22-gauge non-coring needle contained within the kit will be used to puncture the skin/soft tissue and access the refill port. Placement within the refill reservoir will be confirmed by aspirating drug from within the pump. All residual drug within the pump will be aspirated prior to refilling the pump with new infusate solution. Care will be taken to ensure that no drug extravasates subcutaneously or comes in contact with the patient's skin.

#### 8.2 General Concomitant Medication and Supportive Care Guidelines

No prophylactic or supportive care regimens are required for topotecan or gadolinium administration. Renal function should be tested prior to topotecan administration. Systemic side

effects of topotecan are expected to be limited due to the small amount of drug expected to enter the systemic circulation.

Standard supportive care at the discretion of the investigator is allowable. The case report form must capture the concurrent use of all other drugs, over-the-counter medications, or alternative therapies.

### 8.3 Duration of Therapy

In the absence of treatment delays due to adverse events, treatment may continue for entire planned duration of drug infusion (approximately 23-29 days) unless one of the following criteria applies:

- Intercurrent illness that prevents further administration of treatment
- Unacceptable adverse event(s), per the discretion of the principal investigator and primary attending physician
- Patient decides to withdraw from treatment.
- General or specific changes in the patient's condition render the patient unacceptable for further treatment in the judgment of the investigator

### 8.4 Duration of Follow Up

Patients will return as outpatients for follow-up evaluation at one-two and four-five weeks following termination of infusion, unless there is clinical or radiographic indication for more frequent monitoring. Following this assessment, further medical follow-up will be guided by their primary treating physician in accordance with standard of care. Patients will be contacted by phone every 3-6 months until death to assess for survival data. Patients removed from study for unacceptable adverse events will be followed until resolution or stabilization of the adverse event.

### 8.5 Criteria for Removal from Study

Patients will be removed from study when any of the criteria listed in Section 8.3 applies. The reason for study removal and the date the patient was removed will be documented in the Case Report Form.

## **9 DOSING DELAYS/DOSE MODIFICATIONS**

Refer to section 5.4 for dose, dose modifications, dose delays and dose limiting toxicities.

## **10 ADVERSE EVENTS: LIST AND REPORTING REQUIREMENTS**

### 10.1 Adverse events

Topotecan:

We have extensive experience with TPT by CED in human and animal studies with little toxicity except at concentrations of drug greater than planned for in this study [3-5]. In this planned clinical study of topotecan for HGG, the drug will be injected mostly into the tumor and a small amount of brain around the tumor. The brain at risk will mostly be the brain immediately beside the tumor which might result in increased swelling around the tumor after treatment that could cause a brief worsening of brain function. Possible risks associated with such chemotherapy-induced irritation could include seizures, paralysis, sensory loss, language difficulty, loss of intellectual function, and death. Any swelling and the associated clinical worsening should go away in one to two weeks and should be helped by steroids. Systemic effects are thought to be minimal due to the small amount of drug expected to enter the systemic circulation. Upon refilling of the Medtronic infusion pumps, there is small risk of topotecan extravasation into the subcutaneous tissue which could lead to mild local tissue reactions including erythema and bruising as well as severe local tissue injury. There is also risk of similar local tissue injury due to drug extravasation in the event that the infusion catheter becomes disconnected or damaged. Topotecan is considered an irritant chemotherapeutic. Therefore, local extravasation or direct skin contact can lead to tissue inflammation, redness, swelling. There is potential for topotecan to cause local tissue necrosis, however reports of such severe soft tissue reactions were not found in the literature. As topotecan is used as an IV chemotherapeutic, extravasation does likely occur in clinical practice. Case reports document instances of extravasation leading to local discomfort and soft tissue swelling that resolve with cooling the area[33]. Various clinical guidelines at chemotherapy infusion centers similarly recommend cold pack application and washing with soap and water ([34, 35]). As such, should topotecan be found to extravasate or come into contact with skin during this study, the area will be irrigated with soap and water, a cold pack will be applied to extravasated area for 30 min every four hours for 24 hours, and topical hydrocortisone cream 1% will be applied every 6 hours for 7 days. If a subcutaneous drug fluid pocket is present, the pocket can be aspirated to remove as much drug as possible. The risk of extravasation will be mitigated by proper refill technique protocol.

Gadolinium:

Both animal and human trials[2, 5, 17-22] have shown that intracerebral infusion of gadolinium compounds are safe and well tolerated. Pre-clinical animal studies have demonstrated that gadolinium is safe in long-term chronic co-infusion up to 6 weeks[14, 15]. In our previous long-term CED in porcine models, gadolinium was utilized without toxicity issues [2], including in infusions of up to 32 days. Gadolinium has thus been employed in many previous CED studies with promising results, and can be safely used in this study. IV administered gadolinium-based contrast agents have been identified as the cause of the rare disease nephrogenic systemic fibrosis (NSF), which presents as acute to subacute edema of the extremities as well as cutaneous plaques[36]. NSF can also be associated with extremity pain and muscle contractures, and can lead to severe disability and even death. However, development of NSF after gadolinium administration has been linked to renal impairment, with prevalence of 2-6% in patients with severe renal impairment[36] It is unlikely that gadolinium CED would contribute to NSF since it will be given extravascularly in a dilute solution (1:100 gadolinium). Nevertheless, patients in this study will be

screened for appropriate renal function (see Section 6.1), as they will receive both intraparenchymal gadolinium with CED and IV gadolinium for follow-up MRIs. As with any medication, there is risk of allergic reaction and possible anaphylaxis with administration of gadolinium. Patient's will be monitored for allergic reactions and treated appropriately if any evidence of allergy is identified. Patient's with known pre-existing contrast allergies will be excluded from participation in the study.

Of note, the interactions between topotecan and gadolinium have been evaluated, and no concerning interactions have been identified. During our porcine trial, gadolinium was included in all infusions. Characteristic hyperintense T1 gadolinium signal was appreciated on all MRIs performed, suggesting that gadolinium's imaging properties are retained despite presence of topotecan. MTS assays were also performed on human U87 glioma cell lines in which cytotoxic efficacy of 146uM topotecan both with and without 1:100 gadolinium were assessed. In comparison to nutrient rich media without drug, both the TPT-alone and TPT-gadolinium treated cells demonstrated a statistically significant reduction in glioma cell density ( $p < 0.01$  for both). However, no difference in cytotoxicity was seen when the TPT-alone and TPT-gadolinium treated cells were compared ( $p = 0.48$ ; see study report). TPT, therefore, retains its anti-tumoral activity at 48 hours despite the presence of gadolinium.

#### Convection enhanced delivery

The primary risk of CED has been the effects of increased fluid volume in the brain surrounding the tumor. Complications related to cerebral edema from the direct effects of increased volume occur in approximately 10 to 20% of patients [37]. These complications can be manifest by focal neurological deficits referable to the region of the brain being infused or they can result in general lethargy and decreased cognitive function if the edema is more generalized. Cerebral edema is usually reversible by stopping the infusion and treating the patient with dexamethasone and/or mannitol and hypertonic saline.

#### Operation [Stereotactic surgery]

The risks of inserting the infusion catheter into the tumor depend on the tumor's size and location. Possible risks include bleeding, worsening of brain functions (such as moving, feeling and thinking functions), and infection. These risks are expected to happen with a frequency of less than 1-2%. The chance of infection after operations in patients with recurrent malignant brain tumors may be slightly higher than 1-2% due to previous radiation damage to the skin, and because of a higher risk of infection in patients with malignant brain tumors.

In the event that there is a device malfunction, it may be reasonable to attempt revision surgery. Revision may be attempted for identified pump/catheter disconnections, pump failures/permanent stalls, and catheter kinking, all of which would result in failure to deliver drug to the target tissue. The risks of such a revision surgical procedure would be similar to the risks of the initial surgery and include infection, bleeding, as well as risks associated with general anesthesia. During reoperations there is risk of damage to the catheter-pump system, which could



result in a catheter disconnection. Such an event could result in extravasation of chemotherapy into the soft tissue. Topotecan is considered an irritant chemotherapeutic. Therefore, local extravasation or direct skin contact can lead to tissue inflammation, redness, swelling. There is potential for topotecan to cause local tissue necrosis, however reports of such severe soft tissue reactions were not found in the literature. If such extravasation were to occur, the area would be thoroughly irrigated with saline fluid prior to wound closure. The patient's wound would be treated with cold packs for 30 min every four hours for 24 hours, and the tissue will be monitored for visible signs of inflammation.

### Biopsy

Because a small amount of brain tissue is being removed, there is a chance that some small blood vessels may be damaged and that some bleeding may occur. This frequency is on the order of 1%. Risks of bleeding include loss of neurological function and death.

### Surgical complications

The stereotactic catheter implantation procedure and the craniotomy for tumor resection carry a risk for loss of neurologic function, non-neurologic complications and death. These risks depend primarily on the preoperative condition of the patient, the size and location of the tumor and associated diseases. The potential risk for the patient will be determined and will be discussed in detail with the patient prior to the catheter implantation and infusion as well as prior to tumor resection.

### Internal infusion pumps:

Implantation of infusion pumps carry a risk of local tissue injury, swelling, hematoma, and infection around the implantation site. These risks will be mitigated by ensuring hemostasis prior to incision closure, as well as use of appropriate antibiotic irrigation and perioperative IV antibiotics. There is a risk of pump malfunction resulting in insufficient or excess drug delivery. There is risk of pump malfunction following magnetic resonance imaging; as such, pumps will be electronically interrogated to ensure proper functioning following all MRIs and at every follow up interval while that pump is in place. There is risk of pump-catheter disconnection causing infusion of drug into the local subcutaneous space, which can lead to local tissue reactions including possible severe tissue injury. To avoid such complications all connection points will be repeatedly checked and secured prior to incision closure. Infusion pump sites will be routinely inspected at follow up intervals. There is risk of damage to the infusion pump and extravasation of drug into the subcutaneous space during pump refills, which will be avoided by following specific manufacturer instructions for pump refills (see 8.1). All of these risks will be discussed with the patient in detail prior to pump implantation.

The SynchroMed II infusion pump will be used in an off label manner in this study. However, the pumps will be used well within their critical performance range to chronically deliver a fixed volume of fluid over time. The Medtronic pump will be placed under the subcutaneous fascia. This is consistent with the approved use of this product, as such no bio-incompatibility is expected. In these regards, the proposed use of this product for this study is not different from its

approved use, and thus do not pose additional risk. The differences that arise are two, which may add additional risk to those discussed above.

One difference is a change in the drug that is being delivered. Topotecan-gadolinium will be used instead of the approved morphine sulfate, baclofen, ziconotide, floxuridine, and methotrexate. Notably, since the pump is compatible with methotrexate, there is a precedent for its use with chemotherapeutics. The risk of using topotecan-gadolinium, which is not currently approved for use with this pump, is that drug-device incompatibility could occur leading to over/underdosing of medication or damage to the device. While passing through the Medtronic pump, the study drug will come into contact with the following materials: titanium, silicone, and polyvinylidene fluoride. There is no expected interaction between study drug and titanium or silicone, as these products are used in several implanted ports through which topotecan has been infused in human trials[27]. Polyvinylidene fluoride is a plastic that is particularly nonreactive, and resistant to solvents, acids, and bases. As such, this material would not be expected to interact with study drug. Additionally, based on our preclinical studies in pigs in which the same pumps and drugs were used, no device interactions were noted. Pumps did not experience unexpected stalls or interruptions in infusions. Pumps continued to infuse without complication throughout the entirety of the intended infusions (up to 32 days). Topotecan was detectable in the target tissue by LCMS and gadolinium was detectable by MRI, suggesting that neither drug was altered by the device components with which it came into contact. The risk of drug incompatibility causing dosing errors will be mitigated by regular pump interrogations following pump implantation as well as prior to and following all MRI procedures and pump refills. During pump refills, remaining drug volumes will be aspirated, measured, and compared to the expected remaining volume based on infusion rates.

The second difference that arises in this experiment is the target infusion location. The pump is approved for use in the epidural, intrathecal, and intravascular spaces; however, our project will employ its use in the intracerebral space. The issue should not present significant new risks, as the pumps ability to infuse a fixed volume of fluid over time should not be changed by the intracerebral location of the infusion catheter. By nature of the fact that the pump is certified for intrathecal use, it is capable of delivering drug despite normal fluctuations in ICP. In fact, the fluctuations in ICP encountered in lumbar intrathecal location would be greater than those found intracranial, as intrathecal lumbar pressure can fluctuate widely with patient position (standing, recumbent). Since intracerebral placement, would subject the pump to usual intracranial ICP (with fewer fluctuations than lumbar placement) there should be no pressure related mechanical issues preventing stable infusion. The risk that arises due to intracranial location is that errors in dosing could result in cerebral damage. Again, this risk is mitigated by the fact that the pump will be used within its critical performance attribute range. The pump will be regularly interrogated and drug dosing will be regularly checked as described above. Regular cerebral imaging (MRIs) will be obtained, in which brain swelling and mass effect will be assessed. In the case of complication related to drug infusion causing cerebral edema/mass effect, the following measures (as described in the protocol) can be performed if indicated: the infusion can be stopped, steroids, mannitol, hypertonics can be administered, and decompressive craniotomy/craniectomy can be performed.

Throughout the course of the infusions there will be multiple checks in place in order to identify system failures. Firstly, patients will undergo serial MRIs. This procedure will provide direct visual evidence of continued drug delivery. If a decreasing volume of drug distribution is seen during an active infusion, or if an increasing volume of drug distribution is seen during a rest phase, the system will be further investigated via pump interrogation and possible residual drug aspiration. Following every MRI and refill procedure, the pump will be interrogated using the Synchronmed II Tablet clinician programmer. The programmed infusion rate will be verified, and any stalls or incorrectly programmed rates will be noted. The programmer will also be used to check the residual volume of drug in the pump. This value is the result of a calculation based on the programmed rate and initial drug volume in the pump. This calculated volume will then be compared to the volume of residual drug aspirated from the pump during refill procedures. Any discrepancy between calculated residual volume and actual residual volume may signal an infusion malfunction. Such discrepancies will be recorded. By comparing data from pump interrogations, refills, and MRIs, both the integrity of the pump and catheter can be assessed. For instance, if infusion is not seen on MRI, and both pump interrogation and residual pump volume investigation are normal, a potential catheter disconnection may explain the MRI findings. In this situation, an X-ray or ultrasound of the catheter course can be obtained to assess the integrity of the tubing. If infusion is not seen on MRI, electronic pump interrogation is normal, but excess residual drug is aspirated during a refill, a block in the tubing may have occurred. Again, an X-ray or ultrasound can be obtained to assess the integrity of the tubing. Failures in the pump itself will be recognized by electronic interrogation.

#### Pump Refills:

Upon refilling of the Medtronic infusion pumps, there is small risk of topotecan extravasation into the subcutaneous tissue (“pocket fill”) which could lead to mild local tissue reactions including erythema and bruising as well as severe local tissue injury. Topotecan is considered an irritant chemotherapeutic. Therefore, local extravasation or direct skin contact can lead to tissue inflammation, redness, swelling. There is potential for topotecan to cause local tissue necrosis, however reports of such severe soft tissue reactions were not found in the literature. As topotecan is used as an IV chemotherapeutic, extravasation does likely occur in clinical practice. Case reports document instances of extravasation leading to local discomfort and soft tissue swelling that resolve with cooling the area[33]. Various clinical guidelines at chemotherapy infusion centers similarly recommend cold pack application and washing with soap and water ([34, 35]). As such, should topotecan be found to extravasate or come into contact with skin during this study, the area will be irrigated with soap and water, a cold pack will be applied to extravasated area for 30 min every four hours for 24 hours, and topical hydrocortisone cream 1% will be applied every 6 hours for 7 days. If a subcutaneous drug fluid pocket is present, the pocket can be aspirated to remove as much drug as possible. The risk of extravasation will be mitigated by proper refill technique protocol.

#### MRI with Internal Pumps:

Medtronic Synchronmed II pump performance has been established for 1.5 and 3T horizontal closed bore MRIs, which are the only types of MRIs that will be used in this study in order to

mitigate risks to the patients. To further mitigate risks, all product catalogue recommendations for MRI use will be followed (see below).

In general, the main risk of MRI is extended pump stalls. During MRI, pump stalls are expected and should occur, but should be temporary in nature. However, pump stalls of 2-24 hours have been reported. Stalls should resolve 20 minutes after the patient is removed from the magnetic field. In accordance with Medtronic recommendations, pumps will be interrogated with the Synchroned II Tablet clinician programmer following MRIs. The investigator will ensure that the event log has recorded the following events: "Motor stall occurred" and "Motor stall recovery occurred." If these events are not logged, the pump will be re-interrogated after 20 minutes as is recommended. This procedure will be repeated until stall recovery is recorded. If motor stall recovery is not achieved after repeated attempts, a Medtronic representative will be contacted for further troubleshooting assistance.

There is potential for permanent stall if there is 90° alignment of an implanted pump with the Z axis of 1.5 T and 3.0 T horizontal, closed-bore magnetic resonance imaging (MRI) scanners. This positioning will be avoided by implanting the device face up in the subcutaneous soft tissue (required to allow for pump refills). In this position, a 90-degree alignment with the Z axis in a closed bore MRI is not possible. As recommended by the Medtronic manual, prior to all MRIs, pumps will be palpated by the investigator to ensure that their positioning has not shifted and to confirm that there is no possibility for a 90-degree alignment with the Z axis of the MRI.

In general, the risk of any pump stall is acceptable, as cessation in topotecan infusion would not present an increased risk to the patient.

#### Catheters:

The Integra Spetzler catheter utilized in this study will be used in an off label manner for convection enhanced delivery. The catheter is made of a silicone elastomer and approved for lumbar subarachnoid placement for drainage of CSF into the peritoneum. In the proposed study, the catheter will be placed intra-parenchymal which represents a difference from its approved placement route. Both of these spaces (intra-parenchymal and lumbar subarachnoid) however, are intradural and thus within the neuraxis. As such, there should be no increased risk of infection/meningitis with the proposed placement. In terms of catheter contact with the brain parenchyma, no additional risk is perceived as the catheter is made of the same silicone elastomer as all Integra CSF shunting products, many of which are purposely designed to traverse brain parenchyma. Furthermore a larger diameter Integra lumbo-peritoneal catheter of the same type was used in our previous human trial for intraparenchymal/intratumoral placement and topotecan infusion without catheter-associated complications[1].

In its approved use, the lumbar catheter tubing passes through muscle, fascia, fat, and subcutaneous tissue, and is thereby compatible with all of these spaces. The catheter, in the proposed use, will be placed below the subcutaneous fascia and above muscle. Since the catheter normally passes through these spaces, no biological incompatibility is expected with the proposed use. Furthermore, during our porcine preclinical experiments in which these catheters

were placed in the subcutaneous soft tissue, no abnormal tissue swelling or breakdown was seen along the catheter tract.

The main risk arises from the fact that the catheter is not designed for drug delivery. As such, there is a risk of drug incompatibility with the catheter material. As mentioned above, this catheter is made of the same silicone elastomer as other Integra CSF shunting products. Specifically, the Integra Pudenz proximal catheter (Integra, Plainsboro NJ, NL850-1504) is also made of silicone elastomer, and is designed for both CSF shunting as well as drug delivery. This silicone catheter is used in conjunction with Integra Ommaya drains (Integra, Plainsboro NJ, product number: NL8501213) to deliver various intrathecal chemotherapeutics, including topotecan in various clinical trials[28, 29]. As such, there is no reasonable expectation of drug-material interaction using the proposed catheter. This expectation is supported by the fact that topotecan-gadolinium was infused through these catheters in our preclinical porcine trial. Following infusion through these catheters, topotecan was detectable in the target tissue by LCMS and gadolinium was detectable by MRI, suggesting that neither drug was altered by the catheter components with which it came into contact. Following infusions, visual inspection of the catheters revealed no breaks or discontinuities in the catheter materials.

Additionally, since the catheter is not designed specifically for drug delivery, there is the possibility that the catheter will be unable to deliver drug at the desired rate due to flow limitations. This risk is extremely unlikely. The lumbar catheter is designed to accommodate fluid flow at a rate similar to (and exceeding) that of CSF production, which is roughly 20mL/hr. As such, the catheter should be capable of accommodating continuous fluid flow at the far lower rate of 0.2mL/hr required in this study. Again, in preclinical porcine studies, topotecan-gadolinium was successfully delivered through this catheter without obstructions to flow as evidence by the presence of intracerebral gadolinium observed on MRI. To ensure appropriate drug delivery through the catheter, regular pump interrogations will be performed as described above. During pump refills, remaining drug volumes will be aspirated, measured, and compared to the expected remaining volume based on infusion rates. Serial MRIs will be performed to ensure successful delivery of drug to the target tissues.

The only modification that will be made to the lumbar catheter is that roughly 2cm of the proximal end of the closed tipped catheter will be cut off. This modification will remove the multiple draining holes that are found along the length of the first 1.7cm of the catheter. This modification will allow connection of the lumbar catheter to both the intracerebral catheter and infusion pump, thereby creating a closed system with no additional/unintended points of drug efflux. This modification will increase safety, as it will ensure that drug is delivered directly to the desired target area at the tip of the proximal catheter. We do not feel that this modification will increase risk to the patient.

While the lumbar catheter proposed is not approved for use with the Medtronic pump, it has been used in combination with the Synchronmed II pump in our preclinical animal experiments without issue. The outer diameter of the proposed catheter is 1.5mm and the inner diameter is 0.7mm. This catheter has been used during preclinical pig experiments. A secure connection between the catheter tubing and the Synchronmed II port is able to be formed without slippage of the catheter.

However, the main risk of using this catheter with the synchroed pump would be a catheter-pump disconnection. This risk is mitigated by tying a 2-0 silk suture around the connection site and securing it with tight surgical knots. This technique has been used in the pig experiments and no instances of catheter-pump disconnections occurred. To further mitigate risk of catheter pump disconnection, an excess loop of catheter will be left in the shunt pocket to allow for additional slack on the catheter thereby preventing tension from being placed on the catheter-pump connection.

Anesthesia:

Patients undergoing general anesthesia will be subjected to associated risks including pneumothorax, pneumonia, airway injury, hypotension, myocardial infarction, stroke, hepatic and renal injury and death. These risks will be discussed with the patient prior to enrollment by the primary surgeon/investigator as well as immediately prior to surgery by the anesthesia team.

Infection:

The probability of postoperative wound infection is increased due to immune suppression by steroids, which occurs in patients with brain tumors. All patients will be treated perioperatively and during the infusion with appropriate antibiotics per the discretion of the neurosurgeon. For patients with external catheter infusions, there is increased risk of meningitis/encephalitis due to skin flora tracking down the catheter and into the brain. In order to prophylaxis against meningitis/encephalitis, patients will continue to receive appropriate antibiotics per the discretion of the neurosurgeon, preferably 1 gram of IV cefazolin every 12 hours, plus or minus one hour, until the catheter is removed. For patients who are allergic to penicillin/cephalosporins, IV vancomycin will be used (dosing based on individual patient weight and renal function) or another appropriate antibiotic.

Elevated intracranial pressure:

Intracranial pressure falls under the category of events not described adequately by CTCAE and can be therefore be recorded by the investigator by severity (mild, moderate, severe, life-threatening). All events are evaluated and recorded for duration, and relation to study medication infusion (unrelated, unlikely, possible, probable, definite).

Given that brain tumor patients often present with symptoms and signs of increased intracranial pressure (ICP), increased intracranial pressure is classified as a preexisting condition which will be recorded as an adverse event if the frequency, intensity, or if the character of the condition worsens during the study period. Patients demonstrating evidence of *mild increased intracranial pressure* from baseline may be *treated with high doses of dexamethasone* prior to, during, and following the drug treatment. Patients with signs of *moderate increased intracranial pressure* from baseline may be *treated with high doses of dexamethasone* plus intravenous hypertonic saline prior to, during, and following the drug treatment. Patients with signs of *severe to severe increased intracranial pressure* from baseline may be *treated with high doses of dexamethasone*, intravenous hypertonic saline and mannitol as needed to reduce ICP during toxin infusions.

Infusion may be stopped if patients demonstrate signs of severe to life-threatening increased intracranial pressure following adjunct administration of high dose dexamethasone, hypertonic saline and mannitol. Patient may resume infusion at standard rate of infusion upon resolution of event and return to baseline ICP score has been achieved based on clinical and radiologic parameters (neurologic examination, MRI scan, and normalization of laboratory values.) If symptoms fail to abate following discontinuation of the infusion, CT or MR scan may be performed to evaluate for hemorrhage/edema. If symptoms remain unmanageable by medications, craniotomy may be performed.

Except for the infusion of TPT and gadolinium into the tumor, and MRI imaging of the infusion process, all procedures and treatments participants will experience during the care of their brain tumor are non-investigational; the types of medical treatments, procedures, and tests they experience will be Standard of Care for patients with brain tumors.

#### Patient Evaluation Procedures:

The evaluation of patients before and after Topotecan treatment should entail little risk. Blood testing requires a simple venipuncture to remove blood samples with minimal risk of peripheral nerve damage or wound infection. Idiosyncratic and allergic reactions to gadolinium for MRI scans are possible, but occur rarely and are usually self-limited.

#### Radiation:

The risks involved in exposure to the amount of radiation delivered during head CTs are very low. Patients will be counseled to monitor and minimize their cumulative radiation exposure.

#### Unknown risks:

There may as yet be unknown risks associated with the drug treatment not determined by preclinical studies. Neurological deficits are possible secondary to direct brain toxicity. The nature of these deficits would be dependent on the location of the tumor and infusion volume.

### 10.2 Definitions

#### **Adverse Event:**

An adverse event (AE) is any untoward or unfavorable medical occurrence in a human subject, including abnormal sign, symptom or disease, temporally associated with the subject's participation in research, whether or not considered related to the subject's participation in the research. Abnormal results of a procedure are considered to be adverse events if the abnormality:

- results in study withdrawal
- is associated with a serious adverse event
- is associated with clinical signs or symptoms
- leads to additional treatment or to further diagnostic tests
- is considered by the investigator to be of clinical significance

**Serious Adverse Event:**

Adverse events are classified as serious or non-serious. A serious adverse event is any AE that is:

- fatal
- life-threatening
- requires inpatient hospitalization/prolongation of existing hospitalization, unless:
  - routine treatment or monitoring of the studied indication, not associated with any deterioration in condition (procedures such as central line placements, paracentesis, pain control)
  - elective or pre-planned treatment for a pre-existing condition that is unrelated to the indication under study and has not worsened since the start of study drug
  - treatment on an emergency outpatient basis for an event not fulfilling any of the definitions of an SAE given above/below and not resulting in hospital administrations
  - social reasons and respite care in the absence of any deterioration in the patient's general condition
- results in persistent or significant disability or incapacity
- a congenital anomaly or birth defect
- an important medical event

Important medical events are those that may not be immediately life threatening, but are clearly of major clinical significance. They may jeopardize the subject, and may require intervention to prevent one of the other serious outcomes noted above. For example, drug overdose or abuse, a seizure that did not result in in-patient hospitalization or intensive treatment of bronchospasm in an emergency department would typically be considered serious.

All adverse events that do not meet any of the criteria for serious events should be regarded as non-serious adverse events.

**Unanticipated Problem:**

An unanticipated problem is any incident, experience or outcome involving risks to subjects or others in any human subjects research that meets all of the following criteria:

- Unexpected (in terms of nature, severity or frequency) given (a) the research procedures that are described in the IRB-approval protocol and informed consent document, and (b) the characteristics of the subject population being studied;
- Related or possibly related to participation in such research (e.g., there is a reasonable possibility that the incident, experience or outcome may have been caused by the procedures involved in such research); and
- Suggests that the research places subjects or others at a greater risk of harm (including physical, psychological, economic or social harm) than was previously known or recognized.

**Adverse Event Reporting Period**



The study period during which adverse events must be reported is normally defined as the period from the initiation of any study procedures (e.g., after the first dose of study treatment) to the end of the study treatment (e.g., last dose of study treatment) and/or follow-up. For this study, the study treatment follow-up is defined as 30 days following the last administration of study treatment, or 30 days following the decision to remove the subject from study treatment, whichever is earliest.

### **Baseline/Preexisting Condition**

A baseline/preexisting condition is one that is present at the start of the study. A preexisting condition should be recorded as an adverse event if the frequency, intensity, or if the character of the condition worsens during the study period.

### **General Physical Examination Findings**

At screening, any clinically significant abnormality should be recorded as a preexisting condition. At the end of the study, any new clinically significant findings/abnormalities that meet the definition of an adverse event must also be recorded and documented as an adverse event.

### **Post-study Adverse Event**

All unresolved adverse events should be followed by the investigator until the events are resolved, the subject is lost to follow-up, or the adverse event is otherwise explained. At the last scheduled visit, the investigator should instruct each subject to report any subsequent event(s) that the subject, or the subject's personal physician, believes might reasonably be related to participation in this study.

### **Abnormal Laboratory Values**

A clinical laboratory abnormality should be documented as an adverse event if any one of the following conditions is met:

- The laboratory abnormality is not otherwise refuted by a repeat test to confirm the abnormality
- The abnormality suggests a disease and/or organ toxicity
- The abnormality is of a degree that requires active management (e.g., change of dose, discontinuation of the drug, more frequent follow-up assessments, further diagnostic investigation, etc.).

### **Hospitalization, Prolonged Hospitalization or Surgery**

Any adverse event that results in hospitalization or prolonged hospitalization should be documented and reported as a serious adverse event unless specifically instructed otherwise in this protocol. Any condition responsible for surgery should be documented as an adverse event if the condition meets the criteria for an adverse event.

Neither the condition, hospitalization, prolonged hospitalization, nor surgery are reported as an adverse event in the following circumstances:

- Hospitalization or prolonged hospitalization for diagnostic or elective surgical procedures for a preexisting condition. Surgery should not be reported as an outcome of an adverse event if the purpose of the surgery was elective or diagnostic and the outcome was uneventful.
- Hospitalization or prolonged hospitalization required to allow efficacy measurement for the study.

- Hospitalization or prolonged hospitalization for therapy of the target disease of the study, unless it is a worsening or increase in frequency of hospital admissions as judged by the clinical investigator.
  - Prolonged stay at CUMC or NeuroICU at the Investigator's discretion unless it is for an adverse event that otherwise qualifies as an SAE.

### 10.3 Recording of Adverse Events

At each contact with the subject, the investigator must seek information on adverse events by specific questioning and, as appropriate, by examination. Information on all adverse events should be recorded immediately in the source document, and also in the appropriate adverse event module of the case report form (CRF). All clearly related signs, symptoms, and abnormal diagnostic procedures results should be recorded in the source document, though should be grouped under one diagnosis.

All adverse events occurring during the study period must be recorded. The clinical course of each event should be followed until resolution, stabilization, or until it has been determined that the study treatment or participation is not the cause. Serious adverse events that are still ongoing at the end of the study period must be followed up to determine the final outcome. Any serious adverse event that occurs after the study period and is considered to be possibly related to the study treatment or study participation should be recorded and reported immediately.

The investigator will make every effort to determine the relationship of each AE to: surgical procedure, CED, topotecan, and gadolinium. Causality should be assessed using the following categories: not related, unlikely, possible, probable, and definite.

### 10.4 Reporting of Serious Adverse Events

#### 10.4.1 IRB Notification by Sponsor-Investigator

Reports of all events (including follow-up information) that meet the definition of an unanticipated and serious problem posing risk to subjects or others must be submitted to the IRB within 5 business days following the occurrence of the unanticipated problem or the principal investigator's acquiring knowledge of the unanticipated problem in accordance with IRB policy. Additionally, the sponsor-investigator will submit a summary of all Unanticipated problems that occurred since the beginning of the study at the time of continuing review. Unanticipated events that are not considered serious adverse events, will be reported at the time of continuing review. Copies of each report and documentation of IRB notification and receipt will be kept in the Regulatory binder.

#### 10.4.3 FDA Notification by Sponsor-Investigator

The Columbia University Medical Center Sponsor-Investigator, as holder of the IND, will be responsible for all communication with the FDA. Columbia University Medical Center Principal Investigator will report to the FDA, regardless of the site of occurrence, any adverse event that is serious, unexpected and there is evidence to suggest a causal relationship between the drug and

**Columbia University Medical Center  
Herbert Irving Comprehensive Cancer Center  
Version Date: 04/03/2019**

the adverse event. These must be reported to the FDA and any affiliate sites as soon as possible, but in no case later than 15 calendar days after the sponsor determines that the information qualifies for reporting. The Sponsor-Investigator will also submit an IND annual report to the FDA in accordance with 21.CFR 312.33.

The Columbia University Medical Center Sponsor Investigator must report to the FDA and any affiliate site investigators as follows:

- Any unexpected fatal or life-threatening event must be reported as soon as possible, but no later than 7 calendar days after the sponsor investigator initial receipt of the information
- Any findings from epidemiological studies, pooled analysis of multiple studies, or clinical studies, whether or not conducted under an IND, and whether or not conducted by the sponsor-investigator, that suggest a significant risk in humans exposed to the drug must be reported as soon as possible but no later than 15 calendar days after the sponsor-investigator determines that the information qualifies for reporting
- Any findings from animal or in vitro testing whether or not conducted under an IND, and whether or not conducted by the sponsor-investigator, that suggest a significant risk in humans exposed to the drug must be reported as soon as possible but no later than 15 calendar days after the sponsor-investigator determines that the information qualifies for reporting
- Any clinically important increase in the rate of a serious suspected adverse reactions over that listed in the protocol or Investigator Brochure
- Expected SAEs and AEs will be included in the IND Annual Reports.

Follow-up information to a safety report should be submitted as soon as the relevant information is available. However, if the results of a sponsor's investigation show that an adverse drug experience not initially determined to be reportable are so reportable, the sponsor investigator must report such experience as soon as possible, but no later than 15 calendar days after the determination is made.

All other serious unexpected experiences associated with the use of the study treatment will be reported to FDA as soon as possible but in no event later than 15 calendar days after initial receipt of the information.

#### 10.4.4 DSMC Reporting by the Sponsor Investigator

Serious adverse events not constituting unanticipated problems are to be reported to the HICCC DSMC. Reporting should occur within 24 hours of knowledge of the SAE occurring at our institution or affiliate sites.

#### 10.4.5 Reporting to Drug Manufacturer by Sponsor-Investigator

The Sponsor-Investigator will any serious adverse events that meet the reporting criteria to the Institutional Review Board and DSMC as described above. Since drug stock is being purchased directly from commercial entities, there is no need for adverse event reporting directly to the drug manufacturer.

## 10.5 Reporting Process

Adverse events may be submitted on FDA Form 3500A, the HICCC DSMC Serious Adverse Event Reporting Form, or in a narrative format. If supplied as in a narrative format, the minimum information to be supplied is noted above at the beginning of section 10.

## 11 PHARMACEUTICAL INFORMATION

### Study Drugs

#### 11.1 Description

The infusate administered to the patient consists of 146uM Topotecan (TPT, Hycamtin, Novartis, GalaxoSmithKlein) and approximately 1:100 Gadolinium.

Due to variability of the molecular weight of topotecan depending on the manufacturer the pharmacist preparing the infusate will need to calculate the micrograms/hour rate for each pulse which must then be verified by an investigator prior to filling and programming the pump.

#### 11.2 Treatment Regimen

In each pulse cycle, patients will receive 200uL/hr of 146uM topotecan for 48 hours (daily volume = 4.8 mL; total volume = 9.6 mL) followed by between five to seven days of therapy holiday during which the pumps will be set at the minimum programmable rate (2uL/hr; 5-7 day volume = 0.24-0.336mL). This cycle will be repeated two more times. After three complete cycles, patients will receive a fourth and final pulse at the same infusion rate (200uL/hr for 48 hours, plus or minus 6 hours). After this fourth dose, patients will be taken to the OR for pump removal and tumor resection as described. Once infusions are initiated, they will be carried out over a total of approximately 23-29 days. Four 48-hour infusion pulses at 200uL/hr will be administered for a total volume infused of 38.4 mL. When accounting for the near negligible volume delivered while the pump is placed at minimum performance rate (0.048mL/day for 15-21 days), a combined total volume of 39.12-39.41mL will be infused. Gadolinium will not be included in the CED infusion during the second and third infusion cycles; during this time TPT will be infused alone. The reason for including possible variability in the length of each infusion holiday (5-7 days) is that it will allow investigators to ensure that all surgical procedures, including pump removals, tumor resections, pump refills, as well as infusion initiations occur during weekdays when all staff members and support personnel are available to provide appropriate safety monitoring.

Volume or dose deviations of 10% or less are not considered protocol violations.

#### 11.3 Method for Assigning Subjects to Treatment Groups

Not applicable.

11.4 Preparation and Administration of Study Drug

The topotecan and gadolinium will be purchased, stored, prepared and dispensed by the CUMC Research Pharmacy (contact number: 212.305.1965).

11.5 Subject Compliance Monitoring

Patients will be hospitalized for the initial catheter implantation, each 48-hour active drug infusion, and for final tumor resection. To avoid infection complications associated with prolonged hospitalization patients, if medically stable and per investigator discretion, the patient may elect to be discharged during each of the 5-7 day infusion holidays. Pumps will be re-filled percutaneously prior to each new 48-hour pulse of TPT (3 refills total). Re-filling the pump prior to Day 0 of a pulse due to pharmacy availability is allowed and will not affect drug stability. Patients will be monitored throughout the infusion process. Compliance is not expected to be an issue in this study.

11.6 Prior and Concomitant Therapy

No concomitant medicine or therapies for treatment of recurrent glioma are permitted while the patient is enrolled in this study.

11.7 Packaging

Topotecan will be purchased from commercial stock and packaged/labeled accordingly and in compliance with CUMC Research Pharmacy procedures.

11.8 Blinding of Study Drug

Since this is a phase Ib study, in which the primary goal is monitoring safety of therapy, there is no need for blinding.

11.9 Receiving, Storage, Dispensing and Return

11.9.1 Receipt of Drug Supplies

The topotecan will be purchased, stored, prepared and dispensed by the CUMC Research Pharmacy (contact number: 212.305.1965).

11.9.2 Storage

Topotecan should be kept in a secure place in the CUMC research Pharmacy under appropriate storage conditions according to manufacturer guidelines and USP requirements. Study drug will be handled in accordance with institutional policies for appropriate handling and disposal of antineoplastic agents.

### 11.9.3 Dispensing of Study Drug

Regular study drug reconciliation will be performed to document drug assigned, drug consumed, and drug remaining. This reconciliation will be logged on the drug reconciliation form, and signed and dated by the study team.

### 11.9.4 Return or Destruction of Study Drug

Unused drug vials will be returned to the pharmacy and destroyed on site. Excess topotecan will be destroyed in accordance with institutional policies for appropriate disposal of antineoplastic agents. At the completion of the study, there will be a final reconciliation of drug shipped, drug consumed, and drug remaining. This reconciliation will be logged on the drug reconciliation form, signed and dated. Any discrepancies noted will be investigated, resolved, and documented prior to return or destruction of the study drug.

### 11.10 Other Agent(s)

Product description: Gadolinium is a widely available, low cost MR contrast agent that is technically and economically feasible to use, and is routinely used intravenously in clinical practice.

Solution preparation (how the dose is to be prepared): The gadolinium will be used at a dilution of approximately 1:100.

Storage requirements: The original gadolinium solution will be stored in the Research Pharmacy at a temperature of 20-25<sup>0</sup> C. The 1:100 dilution will be prepared fresh prior to being loaded in the pump.

Stability: The original form as well as the final diluted gadolinium is stable.

Route of administration:

Gadolinium will be administered in conjunction with topotecan by convection enhanced delivery at approximately 200uL/hr during the first and fourth cycles of infusion.

## **12 STUDY CALENDAR**

An enumerated list of chronological study procedures has been provided below. Please see Appendix A – Study Calendar.

**MRI:** Specific imaging acquisition instructions are provided in a separate imaging reference guide. MRI scans not performed for any reason will not be considered violations of the protocol. Additional imaging will be performed at the PI's discretion.

Pre-study (14 days or less before registration unless specified otherwise elsewhere in this document):

1. Patient recruited
2. Enrollment criteria verified
3. Informed consent signed
4. MRI with and without IV contrast (within 30 days of enrollment)
5. PET (Brain) – FDG-F18 (within 30 days of enrollment)
6. Pre-study information collected
  - a. Medical history
  - b. Physical exam
  - c. Vital signs
  - d. Height
  - e. Weight
  - f. Performance status (KPS)
  - g. Neurocognitive assessment preformed
  - h. Quality of life assessments performed
  - i. Basic labs/preop testing collected and reviewed
    - i. CBC with differential
    - ii. Coagulation studies (INR/PT/PTT)
    - iii. Serum chemistry (BMP and hepatic function panel)
    - iv. EKG (as indicated by primary care physician/anesthesiology)
    - v. Urine B-HCG for women of childbearing potential

Procedure:

1. MRI with and without IV contrast for intraoperative navigation
2. Stereotactic biopsy performed
  - a. If intraoperative pathology consistent with glioma recurrence, proceed to 3
  - b. If intraoperative pathology not clearly demonstrative of active tumor/recurrent high grade glioma, patient will be deemed inevaluable and removed from trial and replaced. Surgery will be stopped and no catheter will be implanted. Remainder of care will be dictated by primary surgeon and neuro-oncologist.
3. Catheter placement
  - a. Proximal catheter placed into tumor
  - b. Medtronic Synchroned II pump (prefilled with study drug) implanted subcutaneously
  - c. Infusion initiated (Tpt+gadolinium) at rest rate

Implant Recovery:

1. Patient spends approximately 1-7 days post operatively in Neuro ICU in accordance with standard postoperative care. More time in the ICU may be required, per the discretion of the neurosurgeon and Neuro ICU team.

**Columbia University Medical Center**  
**Herbert Irving Comprehensive Cancer Center**  
**Version Date: 04/03/2019**

2. Postoperative day 0 or 1: MRI with and without IV contrast performed to confirm catheter placement prior to infusion initiation
3. Patient transferred out of Neuro ICU once stable
4. Assessments performed at any time during implant recovery and prior to Pulse 1 Day 0:
  - i. Physical exam
  - ii. Vitals
  - iii. CBC with differential
  - iv. Serum chemistry (BMP and hepatic function panel)Adverse event evaluation and concomitant medication review

**Infusion pulse #1:**

1. Infusion day 0:
  - a. Active Infusion initiated (Tpt+Gadolinium)
  - b. MRI without IV contrast performed at 8 hours (plus or minus 2 hours) and 14 hours (plus or minus 2 hours) post infusion initiation
  - c. Assessments performed at any time on infusion day 0:
    - i. Physical exam
    - ii. Vitals
    - iii. Performance status
    - iv. CBC with differential
    - v. Coagulation panel: PT/PTT/INR
    - vi. Serum chemistry (BMP and hepatic function panel)
    - vii. Adverse event evaluation and concomitant medication review
2. Infusion day 1:
  - a. MRI without IV contrast performed at 24 hours, plus or minus 6 hours, post infusion initiation
  - b. Assessments performed at any time on infusion day 1
    - i. Physical exam
    - ii. Vital signs
    - iii. CBC with differential
    - iv. Coagulation panel: PT/PTT/INR
    - v. Serum chemistry (BMP and hepatic function panel)
    - vi. Adverse event evaluation and concomitant medication review
3. Infusion day 2:
  - a. MRI without IV contrast performed at 48 hours, plus or minus 6 hours, post infusion initiation
  - b. Infusion turned down to rest rate
  - c. Assessments performed at any time on infusion day 2
    - i. Physical exam
    - ii. Vital signs
    - iii. Performance status
    - iv. Neurocognitive assessment



**Columbia University Medical Center**  
**Herbert Irving Comprehensive Cancer Center**  
**Version Date: 04/03/2019**

- v. Quality of life assessment
- vi. Adverse event evaluation and concomitant medication review

Rest phase #1: (lasting 5-7 days):

1. Infusion remains at rest rate
2. Rest day 0, post completion of pulse 1
  - a. MRI without IV contrast performed at 8 hours (plus or minus 2 hours) and 14 hours (plus or minus 2 hours) post infusion completion, rest day 0
3. Rest day 1, post completion of pulse 1
  - a. MRI without IV contrast performed at 24 hours, plus or minus 6 hours, post infusion completion, rest day 1
4. Rest day 2, post completion of pulse 1
  - a. PET (Brain) FDG F18 @ 48 hours plus or minus 6 hours, post-infusion completion Patient evaluated for discharge and discharged home at the investigator's discretion. Patient may stay at home for remainder of rest phase.

Infusion pulse #2:

1. Patient admitted to CUMC
2. MRI with and without IV contrast performed prior to restarting infusion
3. Pump refilled (Topotecan only, no gadolinium), interrogated, and reprogrammed
4. Pump reprogrammed to active infusion rate
5. Infusion continues for 48 hours, plus or minus 6 hours, while patient remains inpatient
6. Assessments to be performed at any time on the days indicated on the study calendar.
  - a. Physical exam
  - b. Vital signs
  - c. Performance status
  - d. Adverse event evaluation and concomitant medication review
7. MRI with and without IV contrast performed at 48 hours, plus or minus 6 hours, post infusion initiation
8. Infusion turned down to rest rate after completion of MRI
9. Patient evaluated for discharge and discharged home at the investigator's discretion

Rest phase #2: (lasting 5-7 days)

1. Infusion remains at rest rate
2. Patient may remain home at this time

Infusion pulse #3:

1. Patient admitted to CUMC
2. MRI with and without IV contrast performed prior to restarting infusion
3. Pump refilled (Topotecan only, no gadolinium), interrogated, and reprogrammed
4. Pump reprogrammed to active infusion rate
5. Infusion continues for 48 hours, plus or minus 6 hours, while patient remains inpatient
6. Assessments to be performed at any time on the days indicated on the study calendar

**Columbia University Medical Center**  
**Herbert Irving Comprehensive Cancer Center**  
**Version Date: 04/03/2019**

- a. Physical exam
- b. Vital signs
- c. Performance status
- d. Adverse event evaluation and concomitant medication review
7. MRI with and without IV contrast performed at 48 hours, plus or minus 6 hours, post infusion initiation
8. Infusion turned down to rest rate
9. Patient evaluated for discharge and discharged home at the investigator's discretion

Rest phase #3: (lasting 5-7 days)

1. Infusion remains at rest rate
2. Patient may remain at home at this time

Infusion pulse #4:

1. Patient admitted to CUMC
2. MRI with and without IV contrast performed prior to restarting infusion
3. Pump refilled (Topotecan+Gadolinium), interrogated, and reprogrammed
4. Pump reprogrammed to active infusion rate
5. Infusion continues for 48 hours, plus or minus 6 hours, while patient remains inpatient
6. Assessments to be performed at any time on the days indicated on the study calendar with the exception of the neurocognitive and quality of life assessments which should be performed prior to pulse 4 infusion start.
  - a. Physical exam
  - b. Vital signs
  - c. Performance status
  - d. Neurocognitive assessment
  - e. Quality of life assessment
  - f. Adverse event evaluation and concomitant medication review
  - g. Preop labs (CBC with differential, BMP, coagulation panel (PT, INR, PTT), and hepatic function panel) drawn once
7. PET (Brain) FDG-F18 - Infusion day 1 @ 24 hours +/- 12 hours post initiation of infusion
8. MRI without IV contrast performed at 48 hours, plus or minus 6 hours, post infusion initiation
9. Infusion turned off
10. Patient returns to OR
  - a. Stereotactic biopsies performed
  - b. Tumor resection
  - c. Pump removal
11. Patient admitted to NeuroICU

Patient remains in NeuroICU for 24-48 hours postop for routine care, more time may be required in the ICU, per the discretion of the Neurosurgery and ICU teams.

Post-infusion/Post-operative day 1 or 2:

**Columbia University Medical Center**  
**Herbert Irving Comprehensive Cancer Center**  
**Version Date: 04/03/2019**

1. MRI with IV contrast performed post op day 1 for assessment of extent of resection
2. Assessments performed on post-infusion/post-operative day 1:
  - a. Physical exam
  - b. Vital signs
  - c. Adverse event evaluation and concomitant medication review
  - d. CBC with differential
  - e. Coagulation panel: PT/PTT/INR
  - f. Serum chemistry (BMP and hepatic function panel)

Post-infusion/Post-operative day 3:

1. Assessments performed on post-infusion/post-operative day 3:
  - a. Neurocognitive assessment to be performed within 72 hours plus or minus 24 hours post-infusion/post-op window
  - b. Quality of life assessment to be performed within 72 hours plus or minus 24 hours post-infusion/post-op window

Post-infusion week 1-2:

1. Follow up office visit
2. Assessments performed for this visit:
  - a. Physical exam
  - b. Vital signs
  - c. Weight
  - d. Performance status
  - e. Neurocognitive assessment
  - f. Quality of life assessment
  - g. Adverse event evaluation and concomitant medication review
  - h. CBC with differential
  - i. Serum chemistry (BMP and hepatic function panel)

Post-infusion week 4-6:

1. Follow up office visit
2. Assessments performed for this visit:
  - a. MRI with IV gadolinium contrast
  - b. Physical exam
  - c. Vital signs
  - d. Weight
  - e. Performance status
  - f. Neurocognitive assessment
  - g. Quality of life assessment
  - h. Adverse event evaluation and concomitant medication review
  - i. CBC with differential
  - j. Serum chemistry (BMP and hepatic function panel)

**Columbia University Medical Center  
Herbert Irving Comprehensive Cancer Center  
Version Date: 04/03/2019**

Every 3-6 months thereafter:

1. Phone call for survival assessment
2. Remainder of care per primary clinical team

## **MEASUREMENT OF EFFECT**

### 13.1 Antitumor Effect – Solid Tumors

For the purposes of this study, patients should be re-evaluated for response by MRI 4-6 weeks following cessation of drug infusion. Thereafter, patients will have usual physician follow-up, in which further MRIs will be performed based on their primary neurologist/neurosurgeon's recommendations. In addition to a baseline MRI scan, confirmatory scans should also be obtained at the following timepoints: immediately following placement of the infusion catheter (surgery day), Pulse 1 Day 2, Pulse 4 Day 2, 1 day post resection, 4-6 weeks following drug termination, and then as recommended by the primary treating physician. Response and progression will be evaluated in this study using the international criteria proposed by the updated Response Assessment in Neuro-oncology (RANO) guidelines[38].

Measurement of response will be based upon the volume of contrast enhancing lesion in the treatment area. If the MRI remains unclear as to whether the increase in enhancement volume is due to tumor progression vs. inflammatory change, a biopsy may be performed to make a definitive diagnosis. In order to categorize a response as stable or responding, patients must be on stable or decreasing dose of steroids. Any response must last a minimum of 4 weeks.

### 13.2 Disease Parameters

Measurable disease: Measurable lesions are defined as those that can be accurately measured in at least one dimension on T1 weighted MRI of the brain with IV gadolinium enhancement. Furthermore, recurrent high grade gliomas will be confirmed with stereotactic biopsies and intraoperative pathology prior to implantation of the infusion catheter.

Target lesions: Target lesions will be well circumscribed, solitary enhancing lesions within the brain parenchyma. Ideal target lesions for convection enhanced delivery will not have cystic resection cavities or extensive associated central necrosis.

### 13.3 Methods for Evaluation of Measurable Disease

Measurable disease will be determined from a preoperative T1 weighted brain MRI with IV gadolinium obtained no greater than 48 hours prior to planned implantation of the catheter. Lesions will be measured using hospital radiology tools and viewers as part of the standard assessment performed by neuroradiologists. The number and maximum diameters of the lesions will be recorded.

Prior to implantation of the catheter, stereotactic biopsies will be performed to obtain a sample of enhancing tissue to document the presence of recurrent glioma with intraoperative pathology consult.

### 13.4 Response Criteria

RANO criteria will be used (Wen PY et al, citation 38), summarized here. Response requires confirmation by repeat imaging at least 4 weeks apart. Non-sustained responses will be characterized as stable disease.

| Criterion                       | CR          | PR          | SD                  | PD       |
|---------------------------------|-------------|-------------|---------------------|----------|
| T1 gadolinium enhancing disease | None        | ≥ 50% ↓     | < 50% ↓ but < 25% ↑ | ≥ 25% ↑* |
| T2/FLAIR                        | Stable or ↓ | Stable or ↓ | Stable or ↓         | ↑*       |
| New lesion                      | None        | None        | None                | Present* |
| Corticosteroids                 | None        | Stable or ↓ | Stable or ↓         | NA†      |
| Clinical status                 | Stable or ↑ | Stable or ↑ | Stable or ↑         | ↓*       |
| Requirement for response        | All         | All         | All                 | Any*     |

Abbreviations: RANO, Response Assessment in Neuro-Oncology; CR, complete response; PR, partial response; SD, stable disease; PD, progressive disease; FLAIR, fluid-attenuated inversion recovery; NA, not applicable.  
 \*Progression occurs when this criterion is present.  
 †Increase in corticosteroids alone will not be taken into account in determining progression in the absence of persistent clinical deterioration.

#### 13.4.1 Evaluation of Best Overall Response

The best overall response is the best response recorded from the start of the treatment until disease progression/recurrence. The patient's best response assignment will depend on the achievement of both measurement and confirmation criteria.

#### 13.4 Duration of Response

Duration of overall response: The duration of overall response is measured from the time measurement criteria are met for CR or PR (whichever is first recorded) until the first date that recurrent or progressive disease is objectively documented (taking as reference for progressive disease the smallest measurements recorded since the treatment started).

The duration of overall CR is measured from the time measurement criteria are first met for CR until the first date that progressive disease is objectively documented.

Duration of stable disease: Stable disease is measured from the start of the treatment until the criteria for progression are met, taking as reference the smallest measurements recorded since the treatment started, including the baseline measurements.

#### 13.5 Progression-Free Survival (PFS) and Overall Survival (OS)

PFS is defined as the duration of time from start of topotecan treatment to time of progression or death from any cause, whichever occurs first. Overall survival is defined as the duration of time from the start of topotecan treatment to death from any cause.

### 13.6 Other Response Parameters

Additionally, we attempt to use MRS to monitor response as possible. In our preliminary studies we have seen that maps of normalized choline (Cho), creatine (Cr), N-acetylaspartate (NAA), and lactate (Lac) distributions have correlated well with clinical and radiographic measures of tumor response. There is also considerable evidence in the brain tumor literature that changes in these metabolites, with reduction or elimination of the so-called tumor pattern of proton MRS (elevated Cho, reduced NAA and elevated Lac), correlates well with histologic and clinical response of tumor to therapy. The MRS metabolite maps will be used to assess baseline and immediate post-treatment as well as long term treatment response. These measures may be used to supplement the changes based on T1-weighted contrast enhancement.

### 13.7 Stopping Rules

The primary endpoint of this study is safety. As such, subjects will be withdrawn from the study as per the guidelines outlined in section 6.5. Should similar toxicities occur in more than one patient, early interruption of the study will be considered.

## **14 DATA REPORTING / REGULATORY REQUIREMENTS**

Adverse event lists, guidelines, and instructions for AE reporting can be found in Section 10.0 (Adverse Events: List and Reporting Requirements).

### 14.1 Data Collection

The Herbert Irving Comprehensive Cancer Center has an electronic clinical trials and data management system (CTMS) that will be used for data collection. CRFs for the study will be built into the CTMS for data entry. The system has full auditing capabilities which is web-based and housed on a server in a fully HIPAA compliant server room with restricted access and video camera monitoring. All users must login with their own application username and password. Users off campus must first access the Virtual Private Network with their assigned campus username and password and then use their application credentials. Users are only able to see study information if they are indicated as study personnel in our electronic IRB system. Users are limited to access based on the role assigned in their corresponding protocol. Subject data is entered directly into the system, which (in the case of Columbia subjects) confirms the correct identity of patients via an interface with the electronic medical patient index. Staff with the appropriate IRB defined roles can run reports within the system for reporting purposes.

### 14.2 Data Reporting

Case Report Forms will be completed for each subject enrolled into the clinical study through the CTMS. It is the investigator's responsibility for ensuring that all clinical and laboratory data entered on the corresponding CRFs are complete, accurate and authentic.

#### 14.3 Data and Safety Monitoring Committee

The NCI-approved Data Safety and Monitoring Committee (DSMC) of the Herbert Irving Comprehensive Cancer Center (HICCC) will monitor every subject who receives treatment on this protocol for toxicity. This protocol will adhere to the policies of the currently approved HICCC Data and Safety Monitoring Plan (DSMP), which is in accordance with NCI and CUMC-IRB policy and guidelines. The committee chair is appointed by the HICCC Director. The committee consists of HICCC faculty and staff with expertise in oncology, research pharmacy, research nursing, and data management. The DSMC convenes twice a month to review patient safety and the conduct of the trial. The PI will submit data and safety monitoring reports to the DSMC at a frequency to be determined by the DSMC based on risk to the subjects.

At the time of renewal, the study team will submit the most recent DSMC approval letter for safety review to the CUMC IRB. Any modifications that are required by the DSMC to ensure patient safety will be submitted to the IRB. All protocol deviations, violations, and eligibility waivers will be submitted to and approved by the DSMC prior to being reported to the IRB. All study data reviewed and discussed during these meetings will be kept confidential.

#### 14.4 Quality Control and Quality Assurance

Independent monitoring of the clinical study for protocol and GCP compliance will be conducted periodically by the CPDM Compliance Core on behalf of the HICCC DSMC. Additionally, the Compliance Oversight Committee of the IRB at Columbia University Medical Center may audit the study at any time per institutional policies and procedures. The investigator-sponsor and Columbia University Medical Center will permit direct access of the study monitors and appropriate regulatory authorities to the study data and to the corresponding source data and documents to verify the accuracy of this data.

A risk-based approach will be used by the Compliance Core to determine the frequency, number of subject charts, and data elements to be monitored. The Compliance Coordinator will review the study status and summarize enrollment, toxicities, SAEs/UPs, dose escalation, statistical endpoints (e.g., stopping rules), etc. for the full DSMC membership at the regularly scheduled meetings.

##### Internal On-site Monitoring:

- The study Monitoring Visit Log will be completed and signed by the monitor and the PI/CRNP/CRN and/or CRC and will be filed in the regulatory binder.
- The Compliance Coordinator will communicate with the site coordinator/Site Principle Investigator to schedule the monitoring visit and arrange for access to study materials and documentation.



- The assigned Compliance Coordinator will monitor IIT trials within 1 month after the first subject is enrolled and throughout the life of the study to ensure that the study is being conducted in accordance with the protocol, GCP, applicable federal and local regulations, and per all applicable SOPs. The Compliance Coordinator is responsible to notify the PI and CRNP/CRN/CRC of upcoming monitor visits and convey what information and documentation will be required for the visit(s). The Compliance Coordinator is responsible for verifying that informed consent is properly obtained, eligibility is met (via the central registration process), and all study procedures are conducted according to the study protocol. The Compliance Coordinator will also verify that the data reported in the CRF's accurately reflect source documents, that all toxicities have been reported to date, and that all SAE's/UPs/deviations/violations have been reported according to local IRB and HICCC DSMC requirements. The Compliance Coordinator will issue queries and ensure resolution in a timely and efficient manner. The Compliance Coordinator will also monitor for applicable regulatory compliance and research pharmacy compliance (if applicable) and communicate any deficiencies as appropriate.

#### 14.5 Confidentiality

Information about study subjects will be kept confidential and managed according to the requirements of the Health Insurance Portability and Accountability Act (HIPAA). Those regulations require a signed subject authorization informing the subject of the following:

- What protected health information (PHI) will be collected from subjects in this study
- Who will have access to that information and why
- Who will use or disclose that information
- The rights of a research subject to revoke their authorization for use of their PHI.

In the event that a subject revokes authorization to collect or use PHI, the investigator, by regulation, retains the ability to use all information collected prior to the revocation of subject authorization. For subjects that have revoked authorization to collect or use PHI, attempts should be made to obtain permission to collect at least vital status (e.g., that the subject is alive) at the end of their scheduled study period.

The subject binders will be maintained with in the CPDM offices, a secured floor within the Herbert Irving Pavilion and only the investigator and study staff will have access to the file.

#### 14.6 Source Documents

Source data is all information, original records of clinical findings, observations, or other activities in a clinical trial necessary for the reconstruction and evaluation of the trial. Source data are contained in source documents. Examples of these original documents, and data records include: hospital records, clinical and office charts, laboratory notes, memoranda, subjects' diaries or evaluation checklists, pharmacy dispensing records, recorded data from automated instruments, copies or transcriptions certified after verification as being accurate and complete, microfiches, photographic negatives, microfilm or magnetic media, x-rays, subject files, and records kept at the pharmacy, at the laboratories, and at medico-technical departments involved in the clinical trial.

**Columbia University Medical Center  
Herbert Irving Comprehensive Cancer Center  
Version Date: 04/03/2019**

14.7 Case Report Forms

The study case report form (CRF) is the primary data collection instrument for the study. All data requested on the CRF will be recorded. All missing data will be explained. If a space on the CRF is left blank because the procedure was not done or the question was not asked, “N/D” will be documented. If the item is not applicable to the individual case, “N/A” will be documented.

14.8 Records Retention

Records relating to a specific research activity, including research records collected by investigators, will be maintained for at least three years after completion of the research (45 CFR 46.115(b); 21 CFR 56.115(b); 21 CFR 312.62). This minimum retention period will apply whether or not any subjects were enrolled in the study.

Since this research is FDA regulated, records will be retained for at least two years after approval of the investigational agent by FDA; if it is not approved, records will be retained at least two years after the study is terminated and FDA is notified.

Clinical records, including consent forms that document clinical intervention or clinical diagnostic procedure research-related procedures, will be retained in medical records by the institution for at least seven years, per CUMC and NYP policy which is based on state law.

**15 STATISTICAL CONSIDERATIONS**

15.1 Study Design/Endpoints

Safety is the main study endpoint. Safety is defined as the dose at which all patients have had no greater than grade 2 adverse reactions possibly, probably, or definitely related to the topotecan. For the purposes of this study, necrosis of tumor and edema which result in neurologic symptoms will not be considered as a safety limitation, as long as symptoms can be adequately controlled by corticosteroids, mannitol, and craniotomy if necessary. Safety will be assessed by evaluation of physical and neurologic examinations, laboratory studies, radiographic studies, and by adverse events. An adverse event is any new or worsening symptom or clinical finding which occurs during the study period which is possibly, probably, or definitely related to study-specific treatment. Adverse events are to be recorded irrespective of causality, on the adverse events form. The current version of the CTCAE will be used. For events not described adequately by the CTCAE, the investigator may record events by severity (mild, moderate, severe, life-threatening). All events will be recorded for duration, and relation to study medication (unrelated, unlikely, possible, probable, definite). Any specific therapy for the adverse event will be recorded. Any serious adverse experience associated with the use of this drug will be reported to Institutional IRB.

15.2 Size/Accrual Rate

Five evaluable patients will be accrued for this study. Since radiation necrosis (also called pseudoprogression or treatment effect) is difficult to distinguish from true tumor recurrence

intraoperatively on frozen section, it is likely that several patients meeting enrollment criteria will not have biopsy confirmed tumor at the time the initial study biopsy is taken. Such patients will not be considered evaluable and will not actively enter the treatment phase of the study. As such, anticipated enrollment in the study must be greater than 5 to ensure that 5 evaluable patients are ultimately identified and treated. Based on rates of radiation necrosis, which are roughly 10% of reoperations[26], we will initially cap enrollment at 10 patients, and enrollment will stop when 5 evaluable patients have been obtained. Thus we will have an initial enrollment of 10 patients total (barring any early stopping rule concerns as outlined in section 5.5), and a maximum of 5 evaluable patients that undergo catheter implantation and complete topotecan infusion. Furthermore, if patients who have catheters placed and infusion initiated fail to complete the full course of infusion for reasons unrelated to treatment toxicity/DLTs, they will be considered inevaluable for the primary endpoint (but evaluable for toxicity), as the primary study endpoint is assessment of infusion safety over a full 23. If a patient's infusion is terminated early for reasons unrelated to treatment toxicity/DLTs, then a new subject will be recruited to replace him/her to ensure a total of 5 evaluable subjects at the completion of the study. If patients are removed from the study as a result of failure to follow up with pre-defined safety follow-up evaluations, they will also be considered inevaluable, as assessment of infusion will not be ascertainable in such patients. As above, such inevaluable patients will be replaced with newly recruited and enrolled evaluable patients. Additional patients may be replaced or accrued at the discretion of the PI in discussion with the DSMC if there is further clarity required to assess safety.

Given our previous experience, we expect to enroll approximately 1-2 patients/month.

### 15.3 Stratification Factors

N/A

### 15.4 Analysis of Secondary Endpoints

Anti-tumor effect will be a secondary endpoint of this study and will be analyzed as described in section 13. Furthermore, quality of life will be assessed using 4 questionnaires. All patients enrolled in this study will be administered the following four (4) paper and pencil measures at baseline, prior to receiving their medical treatment, during the pulses and follow-up as indicated on the study calendar. These measures are widely used and well validated and assess the patient's quality of life, in addition to other pertinent symptoms such as fatigue, pain, sleep, mood, etc. All these measures utilize a 5-point Likert-type scale (0 = Not at all; 1 = A little bit; 2 = Somewhat; 3 = Quite a bit; and 4 = Very Much) and the recall period for each question is "during the past 7 days" and this time frame is well comprehended by patients. Each subject's scores on these measures will be compared with their subsequent scores at each follow-up period to closely examine the trajectory of their QoL and symptoms over time while being treated and monitored on this study. Copies of the measures are attached.

1. The FACT-Brain: comprised of the FACT-G + Brain Tumor specific concerns
2. The FACIT-Fatigue scale
3. PROMIS Global health measure

The FACIT Measurement System (Functional Assessment of Chronic Illness Therapy) is a collection of QOL questionnaires targeted to the management of chronic illness. The measurement system, under development since 1987, began with the creation of a generic CORE questionnaire called the Functional Assessment of Cancer Therapy-General (FACT-G). These paper and pencil questionnaires are designed to be brief yet focused to accurately measure the symptoms that cancer patients can experience. The FACT-G (now in Version 4) is a 27-item compilation of general questions divided into four primary QOL domains: Physical Well-Being, Social/Family Well-Being, Emotional Well-Being, and Functional Well-Being. It is considered appropriate for use with patients with any form of cancer, and has also been used and validated in other chronic illness conditions (e.g., HIV/AIDS and multiple sclerosis) and in the general population. The FACT-Br includes a list of 23 additional concerns that brain tumor patients often experience.

The Functional Assessment of Chronic Illness Therapy-Fatigue Scale (FACIT-F Scale) is a 13-item questionnaire that assesses self-reported fatigue and its impact upon daily activities and function. It was developed in 1994-1995 to meet a growing demand for the precise evaluation of fatigue associated with anemia in cancer patients. Subsequent to its development, it has been employed in over 70 published studies including over 20,000 people. Since 1995, studied groups have included cancer patients receiving chemotherapy, cancer patients not receiving chemotherapy, long term cancer survivors, and several other clinical samples.

The PROMIS Global Health items assess health in general (i.e. overall health). The global health items include global ratings of the five primary PROMIS domains (physical function, fatigue, pain, emotional distress, social health) as well as perceptions of general health that cut across domains. Global items allow respondents to weigh together different aspects of health to arrive at a “bottom-line” indicator of their health. Similar global health items have been found predictive of future health care utilization and mortality. The PROMIS Global Health items include the most widely used single self-rated health item (“In general, would you say your health is . . .”). PROMIS Global Health items include specific ratings of physical health and mental health, as well as a rating of overall quality of life. The remaining items provide global ratings of physical function, fatigue, pain, emotional distress, and social health. There is no reporting period specified for these items; current status is inferred.

## 15.5 Reporting and Exclusions

### 15.5.1 Evaluation of toxicity

All patients will be evaluable for toxicity from the time of their first treatment with the study drug.

#### 15.5.2 Evaluation of response

Response will be evaluated based on degree of tumor recurrence progression seen on follow up MRIs at 3-months post infusion and MRIs performed thereafter per their primary treating physician. All conclusions should be based on all eligible patients. Subanalyses may then be performed on the basis of a subset of patients, excluding those for whom major protocol deviations have been identified (e.g., early death due to other reasons, early discontinuation of treatment, major protocol violations, etc.).

#### 15.5.3 Pathologically Evaluable

Patient's whose pre-study (via standard of care processes) biopsy material is reviewed as active tumor, consistent with HGG.

### **16 PROTECTION OF HUMAN SUBJECTS**

This study is to be conducted in accordance with applicable government regulations and Institutional research policies and procedures.

This protocol and any amendments will be submitted to a properly constituted Institutional Review Board (IRB), in agreement with local legal prescriptions, for formal approval of the study conduct. The decision of the IRB concerning the conduct of the study will be made in writing to the investigator and a copy of this decision will be obtained before commencement of this study.

All subjects for this study will be provided a consent form describing this study and providing sufficient information for subjects to make an informed decision about their participation in this study. This consent form will be submitted with the protocol for review and approval by the IRB for the study. The formal consent of a subject, using the IRB-approved consent form, must be obtained before that subject is submitted to any study procedure. This consent form must be signed by the subject or legally acceptable surrogate, as outlined in the IRB approved protocol, and the investigator-designated research professional obtaining the consent.

### **17 PUBLICATION PLAN**

Neither the complete nor any part of the results of the study carried out under this protocol, nor any of the information provided by the sponsor for the purposes of performing the study, will be published or passed on to any third party without the consent of the study sponsor. Any investigator involved with this study is obligated to provide the sponsor with complete test results and all data derived from the study.

### **18 REFERENCES**

1. Bruce, J.N., et al., *Regression of recurrent malignant gliomas with convection-enhanced*

- delivery of topotecan*. Neurosurgery, 2011. **69**(6): p. 1272-9; discussion 1279-80.
2. Sonabend, A.M., et al., *Prolonged intracerebral convection-enhanced delivery of topotecan with a subcutaneously implantable infusion pump*. Neuro Oncol, 2011. **13**(8): p. 886-93.
  3. Bruce, J.N., et al., *Regression of Recurrent Malignant Gliomas with Convection-Enhanced Delivery of Topotecan*. Neurosurgery, 2011.
  4. Kaiser, M.G., et al., *Tissue distribution and antitumor activity of topotecan delivered by intracerebral clysis in a rat glioma model*. Neurosurgery, 2000. **47**(6): p. 1391-8; discussion 1398-9.
  5. Lopez, K.A., et al., *Convection-Enhanced Delivery of Topotecan into a PDGF-Driven Model of Glioblastoma Prolongs Survival and Ablates Both Tumor-Initiating Cells and Recruited Glial Progenitors*. Cancer Res, 2011. **71**(11): p. 3963-71.
  6. Angelastro, J.M., et al., *Selective destruction of glioblastoma cells by interference with the activity or expression of ATF5*. Oncogene, 2006. **25**(6): p. 907-16.
  7. Bruce, J.N., et al., *Intracerebral clysis in a rat glioma model*. Neurosurgery, 2000. **46**(3): p. 683-91.
  8. Senatus, P.B., et al., *Restoration of p53 function for selective Fas-mediated apoptosis in human and rat glioma cells in vitro and in vivo by a p53 COOH-terminal peptide*. Mol Cancer Ther, 2006. **5**(1): p. 20-8.
  9. Friedman, H.S., et al., *Topotecan treatment of adults with primary malignant glioma. The Brain Tumor Center at Duke*. Cancer, 1999. **85**(5): p. 1160-5.
  10. Mardor, Y., et al., *Convection-enhanced drug delivery: increased efficacy and magnetic resonance image monitoring*. Cancer Res, 2005. **65**(15): p. 6858-63.
  11. Mardor, Y., et al., *Monitoring response to convection-enhanced taxol delivery in brain tumor patients using diffusion-weighted magnetic resonance imaging*. Cancer Res, 2001. **61**(13): p. 4971-3.
  12. Sampson, J.H., et al., *Induction of hyperintense signal on T2-weighted MR images correlates with infusion distribution from intracerebral convection-enhanced delivery of a tumor-targeted cytotoxin*. AJR Am J Roentgenol, 2007. **188**(3): p. 703-9.
  13. Raghavan, R., et al., *Convection-enhanced delivery of therapeutics for brain disease, and its optimization*. Neurosurg Focus, 2006. **20**(4): p. E12.
  14. Ding, D., et al., *Convection-enhanced delivery of free gadolinium with the recombinant immunotoxin MRI-1*. J Neurooncol, 2010. **98**(1): p. 1-7.
  15. Ding, D., et al., *Long-term safety of combined intracerebral delivery of free gadolinium and targeted chemotherapeutic agent PRX321*. Neurol Res, 2009. **32**: p. 810-815.
  16. Heiss, J.D., et al., *Image-guided convection-enhanced delivery of muscimol to the primate brain*. J Neurosurg, 2010. **112**(4): p. 790-5.
  17. Lonser, R.R., et al., *Image-guided, direct convective delivery of glucocerebrosidase for neuronopathic Gaucher disease*. Neurology, 2007. **68**(4): p. 254-61.
  18. Lonser, R.R., et al., *Real-time image-guided direct convective perfusion of intrinsic brainstem lesions. Technical note*. J Neurosurg, 2007. **107**(1): p. 190-7.
  19. Murad, G.J., et al., *Image-guided convection-enhanced delivery of gemcitabine to the brainstem*. J Neurosurg, 2007. **106**(2): p. 351-6.
  20. Sampson, J.H., et al., *Colocalization of gadolinium-diethylene triamine pentaacetic acid with high-molecular-weight molecules after intracerebral convection-enhanced delivery in*

- humans. *Neurosurgery*, 2011. **69**(3): p. 668-76.
21. Brady, M.L., et al., *Pathways of infusate loss during convection-enhanced delivery into the putamen nucleus*. *Stereotact Funct Neurosurg*, 2013. **91**(2): p. 69-78.
  22. Richardson, R.M., et al., *Novel platform for MRI-guided convection-enhanced delivery of therapeutics: preclinical validation in nonhuman primate brain*. *Stereotact Funct Neurosurg*, 2011. **89**(3): p. 141-51.
  23. Medtronic. *Targeted Drug Delivery: Indications, Safety, and Warnings*. 2016 [cited 2016 October 1]; Available from: <http://professional.medtronic.com/pt/neuro/idd/ind/#.WBoAJGPeNFK>.
  24. Kirmani, A.R., A.H. Sarmast, and A.R. Bhat, *Role of external ventricular drainage in the management of intraventricular hemorrhage; its complications and management*. *Surg Neurol Int*, 2015. **6**: p. 188.
  25. Haar, P.J., et al., *Gd-DTPA T1 relaxivity in brain tissue obtained by convection-enhanced delivery, magnetic resonance imaging and emission spectroscopy*. *Phys Med Biol*, 2010. **55**(12): p. 3451-65.
  26. Grossman, R., et al., *Impact of Resecting Radiation Necrosis and Pseudoprogression on Survival of Patients with Glioblastoma*. *World Neurosurg*, 2016. **89**: p. 37-41.
  27. Muntz, H.G., et al., *Phase 2 study of intraperitoneal topotecan as consolidation chemotherapy in ovarian and primary peritoneal carcinoma*. *Cancer*, 2008. **113**(3): p. 490-6.
  28. Blaney, S.M., et al., *Phase I clinical trial of intrathecal topotecan in patients with neoplastic meningitis*. *J Clin Oncol*, 2003. **21**(1): p. 143-7.
  29. Potter, S.L., et al., *Phase 2 clinical trial of intrathecal topotecan in children with refractory leptomeningeal leukemia: a Children's Oncology Group trial (P9962)*. *Pediatr Blood Cancer*, 2012. **58**(3): p. 362-5.
  30. *Pudenz Ventricular Catheter*. Integra Neuroscience 2002; Available from: [http://integralife.com/products/pdfs/pudenz%20ventricular%20catheter%20ifu\\_560.pdf](http://integralife.com/products/pdfs/pudenz%20ventricular%20catheter%20ifu_560.pdf).
  31. *Integra CSF Reservoir with Intergral Connectors*. Integra 2003; Available from: [http://www.integralife.com/products/pdfs/integra%20csf%20reservoirs%20ifu\\_546.pdf](http://www.integralife.com/products/pdfs/integra%20csf%20reservoirs%20ifu_546.pdf).
  32. *Operating Room Product Catalog*. Integra LifeSciences 2009; Available from: <http://www.integralife.com/eCatalogs/Operating-Room/OR-Catalog-NS3590-09-09.pdf>.
  33. Oostweegel LM, v.W.L., Schot M, Dubbelman RC, Ten Bokkel Huinink W, Beignen JH., *Extravasation of topotecan, a report of two cases*. *Journal of Oncology Pharmacy Practice*, 1997. **3**(2): p. 115-116.
  34. *Clinical Guideline for the Management of Extravasation of Cytotoxic Drugs in Adults*. NHS Trust.
  35. *Extravasation Guidelines*. Children's Oncology Group, 2007.
  36. Kaewlai, R. and H. Abujudeh, *Nephrogenic systemic fibrosis*. *AJR Am J Roentgenol*, 2012. **199**(1): p. W17-23.
  37. Laske, D.W., R.J. Youle, and E.H. Oldfield, *Tumor regression with regional distribution of the targeted toxin TF-CRM107 in patients with malignant brain tumors*. *Nat Med*, 1997. **3**(12): p. 1362-8.
  38. Wen, P.Y., et al., *Updated response assessment criteria for high-grade gliomas: response assessment in neuro-oncology working group*. *J Clin Oncol*, 2010. **28**(11): p. 1963-72.
